# Supplementary material for: Kidney failure related to broad-spectrum antibiotics in critically ill patients: secondary end point results from a 1200 patient randomised trial
Source: PubMed Central journal article supplement — BMJ Open. 2012 Mar 11;2(2):e000635. doi: 10.1136/bmjopen-2011-000635 (PMC3307126; doi:10.1136/bmjopen-2011-000635), 2012-03-11
Supplement: bmjopen-2011-000635-s1.pdf [file bmjopen-2011-000635-s1.pdf]

**Table 1: Prevalence and duration of kidney organ failure ('Standard exposure' group vs. 'High exposure' group)**

|                                                                                        | <b>'Standard exposure' group<br/>(N=596)</b> | <b>'High exposure' group<br/>(N=604)</b> | <b>p-value</b> |
|----------------------------------------------------------------------------------------|----------------------------------------------|------------------------------------------|----------------|
| <b>EstimatedGFR*:</b>                                                                  |                                              |                                          |                |
| N. days (% of days from day 1 to 28 with values):                                      |                                              |                                          |                |
| Moderately-severely impaired: (eGFR: $\leq 60$ mL/min/1.73 m <sup>2</sup> )            | 3016 (43.4%)                                 | 3672 (48.1%)                             | <0.0001        |
| Severely impaired: (eGFR $\leq 30$ mL/min/1.73 m <sup>2</sup> )                        | 1445 (20.8%)                                 | 1910 (25.0%)                             | <0.0001        |
| Severely impaired: (eGFR $\leq 30$ mL/min/1.73 m <sup>2</sup> ), days from day 1 to 14 | 984 (20.0%)                                  | 1253 (23.5%)                             | <0.0001        |
| <b>'RIFLE' criteria, N patients (%) within day 1 to 28</b>                             |                                              |                                          |                |
| 'R' reached                                                                            | 170 (28.5%)                                  | 209 (34.6%)                              | 0.02           |
| 'I' reached                                                                            | 75 (12.6%)                                   | 92 (15.2%)                               | 0.19           |
| 'F' reached                                                                            | 121 (20.3%)                                  | 150 (24.8%)                              | 0.06           |
| 'R' or death                                                                           | 298 (50.0%)                                  | 327 (54.1%)                              | 0.15           |
| 'I' or death                                                                           | 234 (39.3%)                                  | 252 (41.7%)                              | 0.39           |
| 'F' or death                                                                           | 270 (45.3%)                                  | 287 (47.5%)                              | 0.44           |
| <b>Urea</b>                                                                            |                                              |                                          |                |
| Patients with a urea level ever $\geq 20$ mmol/L (day 1-28); N (%)                     | 217 (37.4%)                                  | 253 (43.4%)                              | 0.04           |

\*eGFR was assessed using the Cockcroft and Gault method [Ref: Cockcroft DW, Gault MH.: Prediction of creatinine clearance from serum creatinine. Nephron 1976;16:31-41]. Actual measured creatinin values were used. If using the 'last observation carried forward' approach regarding creatinin measurement to take into account that patients who died in renal failure should be counted as such, did not change the signal or the statistics of these analyses. 'R':Risk, 'I': Injury, 'F': Failure. Presence of renal failure according to 'RIFLE' was assessed using the guidelines developed by the acute dialysis quality initiative ([www.adqi.net](http://www.adqi.net))

**Table 2: Prevalence of kidney organ failure on the last day of follow-up ('Standard exposure' group vs. 'High exposure' group)**

|                                                                                       | <b>'Standard exposure' group</b> | <b>'High exposure' group</b> | <b>p-value</b> |
|---------------------------------------------------------------------------------------|----------------------------------|------------------------------|----------------|
| <b>Survivors and patients who had last creatinine measured &gt;24 h before death:</b> | <b>(N=432)</b>                   | <b>(N=438)</b>               |                |
| Renal failure (eGFR: $\leq 60$ mL/min/1.73 m <sup>2</sup> )                           | 119 (27.6%)                      | 137 (31.3%)                  | 0.23           |
| <b>Patients who died (with last creatinine measured within 24 h before death):</b>    | <b>(N=150)</b>                   | <b>(N=145)</b>               |                |
| Renal failure (eGFR: $\leq 60$ mL/min/1.73 m <sup>2</sup> )                           | 105 (70.0%)                      | 99 (68.3%)                   | 0.83           |
| <b>All patients with creatinine measurements</b>                                      | <b>(N=582)</b>                   | <b>(N=583)</b>               |                |
| Renal failure (eGFR: $\leq 60$ mL/min/1.73 m <sup>2</sup> )                           | 224 (38.5)                       | 236 (40.5)                   | 0.51           |

\*eGFR was assessed using the Cockcroft and Gault method [Ref: Cockcroft DW, Gault MH.: Prediction of creatinine clearance from serum creatinine. Nephron 1976;16:31-41]. Actual measured creatinin values were used.





**Table 3. Multiple effects models investigating estimated GFR changes after starting and stopping beta-lactam antibiotics**

|                                |                                                | Unadjusted analysis                |         | Multivariable analysis             |         |
|--------------------------------|------------------------------------------------|------------------------------------|---------|------------------------------------|---------|
|                                |                                                | Regression coefficient<br>(95% CI) | P-value | Regression coefficient<br>(95% CI) | P-value |
| <b>After starting the drug</b> |                                                |                                    |         |                                    |         |
| Piperacillin/tazobactam        | Per day more on piperacillin/tazobactam        | 1.39 (1.17, 1.60)                  | <0.0001 | 0.99 (0.71, 1.27)                  | <0.0001 |
| Meropenem                      | Per day more on meropenem                      | 2.74 (2.39, 3.09)                  | <0.0001 | 2.86 (2.45, 3.28)                  | <0.0001 |
| Cefuroxim                      | Per day more on cefuroxim                      | 1.91 (1.67, 2.16)                  | <0.0001 | 1.27 (0.90, 1.64)                  | <0.0001 |
| <b>After stopping the drug</b> |                                                |                                    |         |                                    |         |
| Piperacillin/tazobactam        | Per day after stopping piperacillin/tazobactam | 2.79 (2.35, 3.24)                  | <0.0001 | 2.70 (2.26, 3.14)                  | <0.0001 |
| Meropenem                      | Per day after stopping meropenem               | 0.20 (-0.51, 0.91)                 | 0.59    | 0.17 (-0.52, 0.86)                 | 0.63    |
| Cefuroxim                      | Per day after stopping cefuroxim               | 0.13 (-0.25, 0.50)                 | 0.51    | 0.01 (-0.35, 0.37)                 | 0.96    |

All multivariable analyses were adjusted for: treatment arm ('low exposure' vs. 'high exposure'), gender, age ( $\geq 65$  vs.  $< 65$  years), APACHE II score ( $\geq 20$  vs.  $< 20$ ), Clinically judged infection (severe sepsis/septic shock vs. milder or no infection), patient category (surgical vs. medical) and eGFR level at administration of the antibiotic, (1:  $< 30$  ml/min/1,73 m<sup>2</sup>, 2: 31-60 ml/min/1,73 m<sup>2</sup>, 3:  $> 60$  ml/min/1,73 m<sup>2</sup>).

**Table 4. Multivariable logistic regression: beta-lactam antibiotics and other risk variables vs. binary endpoint eGFR<60 ml/min/1.73m<sup>2</sup> on day 7.**

| Variable                                              | Unadjusted analysis    |         | Multivariable analysis |         |
|-------------------------------------------------------|------------------------|---------|------------------------|---------|
|                                                       | Odds ratio<br>(95% CI) | P-value | Odds ratio<br>(95% CI) | P-value |
| <b>Other variables</b>                                |                        |         |                        |         |
| Age (≥65 vs. <65 years)                               | 2.36 (1.86, 3.00)      | <0.0001 | 1.85 (1.31, 2.60)      | <0.0001 |
| APACHE II score (≥20 vs. <20)                         | 2.49 (1.90, 3.25)      | <0.0001 | 1.64 (1.12, 2.41)      | 0.01    |
| Severe sepsis/septic shock vs. milder or no infection | 2.02 (1.59, 2.56)      | <0.0001 | 1.16 (0.82, 1.66)      | 0.40    |
| Auto-immune disease (Y vs. N)                         | 1.31 (0.73, 2.33)      | 0.36    | NI                     | -       |
| Cancer (Y vs. N)                                      | 1.26 (0.88, 1.79)      | 0.21    | NI                     | -       |
| Charlson score (≥2 vs. <2)                            | 1.72 (1.35, 2.18)      | <0.0001 | 1.70 (1.21, 2.40)      | 0.002   |
| Surgical (Y vs. N)                                    | 1.16 (0.90, 1.50)      | 0.24    | NI                     | -       |
| Body Mass Index (≥25 vs. <25)                         | 1.57 (1.17, 2.12)      | 0.003   | 1.19 (0.78, 1.82)      | 0.41    |
| Gender (Male vs. Female)                              | 1.25 (0.99, 1.57)      | 0.06    | 1.28 (0.92, 1.78)      | 0.14    |
| eGFR level at baseline                                |                        |         |                        |         |
| >60 ml/min/1,73 m <sup>2</sup>                        | Ref                    | -       | Ref                    | -       |
| 31-60 ml/min/1,73 m <sup>2</sup>                      | 14.6 (10.2, 21.0)      | <0.0001 | 11.7 (8.0, 17.0)       | <0.0001 |
| <30 ml/min/1,73 m <sup>2</sup>                        | 81.1 (51.2, 128.5)     | <0.0001 | 65.9 (40.7, 106.6)     | <0.0001 |
| <b>Beta-lactam antibiotics</b>                        |                        |         |                        |         |
| Piperacillin/tazobactam (≥3 vs. <3 days)*             | 2.32 (1.82, 2.96)      | <0.0001 | 1.70 (1.18, 2.43)      | 0.004   |
| Meropenem (≥3 vs. <3 days)*                           | 0.99 (0.71, 1.37)      | 0.94    | NI                     | -       |
| Cefuroxim (≥3 vs. <3 days)*                           | 0.73 (0.57, 0.94)      | 0.01    | 1.24 (0.85, 1.80)      | 0.26    |

All variables entered in the multivariable analysis were adjusted for the other variables in this model. \*All beta-lactam drug exposures are (≥3 vs. <3 days within the first 7 days in the study). All variables with a p-value <0.2 were included in the multivariable model. NI: Not Included.
