# Supplementary material for: Kidney failure related to broad-spectrum antibiotics in critically ill patients: secondary end point results from a 1200 patient randomised trial
Source: PubMed Central journal article supplement — BMJ Open. 2012 Mar 11;2(2):e000635. doi: 10.1136/bmjopen-2011-000635 (PMC3307126; doi:10.1136/bmjopen-2011-000635), 2012-03-11
Supplement: bmjopen-2011-000635-s3.pdf [file bmjopen-2011-000635-s3.pdf]

CONSORT 2010 checklist of information to include when reporting a randomised trial\*

| Section/Topic             | Item No | Checklist item                                                                                                                            | Reported on page No     |
|---------------------------|---------|-------------------------------------------------------------------------------------------------------------------------------------------|-------------------------|
| <b>Title and abstract</b> |         |                                                                                                                                           |                         |
|                           | 1a      | Identification as a randomised trial in the title                                                                                         | 1                       |
|                           | 1b      | Structured summary of trial design, methods, results, and conclusions (for specific guidance see CONSORT for abstracts <sup>21 31</sup> ) | 3                       |
| <b>Introduction</b>       |         |                                                                                                                                           |                         |
| Background and objectives | 2a      | Scientific background and explanation of rationale                                                                                        | 4                       |
|                           | 2b      | Specific objectives or hypotheses                                                                                                         | 4                       |
| <b>Methods</b>            |         |                                                                                                                                           |                         |
| Trial design              | 3a      | Description of trial design (such as parallel, factorial) including allocation ratio                                                      | 5                       |
|                           | 3b      | Important changes to methods after trial commencement (such as eligibility criteria), with reasons                                        | -                       |
| Participants              | 4a      | Eligibility criteria for participants                                                                                                     | 5                       |
|                           | 4b      | Settings and locations where the data were collected                                                                                      | 1,5,15                  |
| Interventions             | 5       | The interventions for each group with sufficient details to allow replication, including how and when they were actually administered     | 6 + fig. 2 + Diagram D1 |
| Outcomes                  | 6a      | Completely defined pre-specified primary and secondary outcome measures, including how and when they were assessed                        | 6-7                     |
|                           | 6b      | Any changes to trial outcomes after the trial commenced, with reasons                                                                     | -                       |
| Sample size               | 7a      | How sample size was determined                                                                                                            | 7-8                     |
|                           | 7b      | When applicable, explanation of any interim analyses and stopping guidelines                                                              | -                       |
| Randomisation:            |         |                                                                                                                                           |                         |
| Sequence generation       | 8a      | Method used to generate the random allocation sequence                                                                                    | 5                       |
|                           | 8b      | Type of randomisation; details of any restriction (such as blocking and block size)                                                       | 5                       |

| Section/Topic                                        | Item No | Checklist item                                                                                                                                                                              | Reported on page No        |
|------------------------------------------------------|---------|---------------------------------------------------------------------------------------------------------------------------------------------------------------------------------------------|----------------------------|
| Allocation concealment mechanism                     | 9       | Mechanism used to implement the random allocation sequence (such as sequentially numbered containers), describing any steps taken to conceal the sequence until interventions were assigned | 5                          |
| Implementation                                       | 10      | Who generated the random allocation sequence, who enrolled participants, and who assigned participants to interventions                                                                     | 6                          |
| Blinding                                             | 11a     | If done, who was blinded after assignment to interventions (for example, participants, care providers, those assessing outcomes) and how                                                    | 6                          |
|                                                      | 11b     | If relevant, description of the similarity of interventions                                                                                                                                 | 6                          |
| Statistical methods                                  | 12a     | Statistical methods used to compare groups for primary and secondary outcomes                                                                                                               | 6-7                        |
|                                                      | 12b     | Methods for additional analyses, such as subgroup analyses and adjusted analyses                                                                                                            | 6-7                        |
| <b>Results</b>                                       |         |                                                                                                                                                                                             |                            |
| Participant flow (a diagram is strongly recommended) | 13a     | For each group, the numbers of participants who were randomly assigned, received intended treatment, and were analysed for the primary outcome                                              | Figure 1 (CONSORT diagram) |
|                                                      | 13b     | For each group, losses and exclusions after randomisation, together with reasons                                                                                                            | Figure 1 (CONSORT diagram) |
| Recruitment                                          | 14a     | Dates defining the periods of recruitment and follow-up                                                                                                                                     | 8                          |
|                                                      | 14b     | Why the trial ended or was stopped                                                                                                                                                          | 8                          |
| Baseline data                                        | 15      | A table showing baseline demographic and clinical characteristics for each group                                                                                                            | Table 1                    |
| Numbers analysed                                     | 16      | For each group, number of participants (denominator) included in each analysis and whether the analysis was by original assigned groups                                                     | 8-9, table 3 +table 4      |
| Outcomes and estimation                              | 17a     | For each primary and secondary outcome, results for each group, and the estimated effect                                                                                                    |                            |

| Section/Topic            | Item No | Checklist item                                                                                                                            | Reported on page No             |
|--------------------------|---------|-------------------------------------------------------------------------------------------------------------------------------------------|---------------------------------|
|                          |         | size and its precision (such as 95% confidence interval)                                                                                  | 9-10 + table 2, 3, 4 + fig. 3+4 |
|                          | 17b     | For binary outcomes, presentation of both absolute and relative effect sizes is recommended                                               | Abstract + p.                   |
| Ancillary analyses       | 18      | Results of any other analyses performed, including subgroup analyses and adjusted analyses, distinguishing pre-specified from exploratory | Table 3, fig. 3+4, p 10.        |
| Harms                    | 19      | All important harms or unintended effects in each group (for specific guidance see CONSORT for harms <sup>28</sup> )                      | Table 3+4, p. 10-11, fig. 3+4   |
| <b>Discussion</b>        |         |                                                                                                                                           |                                 |
| Limitations              | 20      | Trial limitations, addressing sources of potential bias, imprecision, and, if relevant, multiplicity of analyses                          | 13                              |
| Generalisability         | 21      | Generalisability (external validity, applicability) of the trial findings                                                                 | 13                              |
| Interpretation           | 22      | Interpretation consistent with results, balancing benefits and harms, and considering other relevant evidence                             | 10-14                           |
| <b>Other information</b> |         |                                                                                                                                           |                                 |
| Registration             | 23      | Registration number and name of trial registry                                                                                            | 4-5                             |
| Protocol                 | 24      | Where the full trial protocol can be accessed, if available                                                                               | 5                               |
| Funding                  | 25      | Sources of funding and other support (such as supply of drugs), role of funders                                                           | 16                              |

\*We strongly recommend reading this statement in conjunction with the CONSORT 2010 Explanation and Elaboration<sup>13</sup> for important clarifications on all the items. If relevant, we also recommend reading CONSORT extensions for cluster randomised trials,<sup>11</sup> non-inferiority and equivalence trials,<sup>12</sup> non-pharmacological treatments,<sup>32</sup> herbal interventions,<sup>33</sup> and pragmatic trials.<sup>34</sup> Additional extensions are forthcoming: for those and for up to date references relevant to this checklist, see [www.consort-statement.org](http://www.consort-statement.org).
