# Supplementary material for: Kidney failure related to broad-spectrum antibiotics in critically ill patients: secondary end point results from a 1200 patient randomised trial
Source: PubMed Central journal article supplement — BMJ Open. 2012 Mar 11;2(2):e000635. doi: 10.1136/bmjopen-2011-000635 (PMC3307126; doi:10.1136/bmjopen-2011-000635), 2012-03-11
Supplement: bmjopen-2011-000635-s5.pdf [file bmjopen-2011-000635-s5.pdf]

## Diagram D1

## Example of the site-specific interventional algorithm, site 'Aarhus'

### The Procalcitonin And Survival Study (PASS) Intervention Algorithm, Site: Aarhus

IMPORTANT: All patients shall (at least) receive antimicrobial therapy covering "standard-of-care", i.e. if any existing guidelines or evidence for antimicrobial treatment indicate/ contra-indicate surgical and/or antibiotic treatment, then the patient should be treated according to this. Indicated treatment should never be left out because of a possibly low procalcitonin (PCT).

All (except for the above standing situations) patients in the "PCT intervention" group must have treatment according to the present guidelines, including interventions when procalcitonin is  $\geq 1,0$  ng/ml and "Alert"<sup>a</sup>.

Patients are categorized daily according to the PASS intervention categories, on the basis on the present and the previous PCT measurement (displayed as "Alert" or "Non-Alert" in the website). In correspondence with every category, a PASS-intervention is displayed below. The treatment is, adjusted according to new and relevant microbiology that "explains" the clinical picture

|                   |                                                                                                                                                                                                                                                        |
|-------------------|--------------------------------------------------------------------------------------------------------------------------------------------------------------------------------------------------------------------------------------------------------|
| <b>CATEGORY 1</b> | First PCT > 1,0 ng/ml, patient has not received antibiotics ( $\geq 1$ DDD <sup>b</sup> within 72 h)                                                                                                                                                   |
| <b>CATEGORY 2</b> | A) First PCT $\geq 1,0$ ng/ml, patient has received antibiotics ( $\geq$ DDD <sup>b</sup> within 72 h)<br>or<br>B) PCT "Alert" for 1 day after CAT 1, CAT 4 or CAT 5 has been started<br>or<br>C) PCT "Alert"*** from "start-sample" till next morning |
| <b>CATEGORY 3</b> | A) First PCT $\geq 1,0$ ng/ml, patient has received antibiotics ( $\geq$ DDD <sup>b</sup> within 72 h) and clinical suspicion of fungal infection or catheter related infection.<br>or<br>B) PCT "Alert" for 1 day after CAT 2 has been started        |
| <b>CATEGORY 4</b> | A) Start PCT < 1,0 ng/ml<br>or<br>B) "Non-Alert" PCT, but $\geq 1,0$ ng/ml.<br>or<br>C) PCT < 1,0 for 1-2 days                                                                                                                                         |
| <b>CATEGORY 5</b> | PCT < 1,0 ng/ml for 3 or more days.                                                                                                                                                                                                                    |

| Action<br>Category | Diagnostics                                                                                                                                                                                                                                                   | Surgery                                               | Antimicrobials <sup>c</sup>                                                                                                                                                                                                                                                                          |
|--------------------|---------------------------------------------------------------------------------------------------------------------------------------------------------------------------------------------------------------------------------------------------------------|-------------------------------------------------------|------------------------------------------------------------------------------------------------------------------------------------------------------------------------------------------------------------------------------------------------------------------------------------------------------|
| <b>CATEGORY 1</b>  | <ul style="list-style-type: none"> <li>Blood culture</li> <li>Tracheal secretion</li> <li>Urine culture</li> <li>Culture from susp. source</li> <li>Diagnostic imaging of susp. source</li> </ul>                                                             | According to diagnostic imaging and clinical judgment | <ol style="list-style-type: none"> <li>Cefuroxim 1500 mg x 3 i.v. or Ampicillin 1g x 4 / 2 g x 3 i.v.</li> <li>Ciprofloxacin 400 mg x 2 i.v.</li> <li>Consider: Metronidazol 500 mg x 2 i.v.</li> </ol>                                                                                              |
| <b>CATEGORY 2</b>  | <ul style="list-style-type: none"> <li>Blood culture</li> <li>Tracheal secretion</li> <li>Urine culture</li> <li>Culture from susp. source</li> <li>Diagnostic imaging of susp. source</li> </ul>                                                             | According to diagnostic imaging and clinical judgment | <ol style="list-style-type: none"> <li>Pip/Tazo<sup>d</sup> 4gx3 iv or Meropenem 1gx3 iv</li> <li>Ciprofloxacin 400 mg x 2 i.v.</li> <li>Metronidazol 500 mg x 2 i.v.</li> <li>Consider fungal infection: Fluconazole i.v. and cath. inf: Vancomycin, dosage acc.to. Se-Vanco<sup>e</sup></li> </ol> |
| <b>CATEGORY 3</b>  | <ul style="list-style-type: none"> <li>Blood culture</li> <li>Tracheal secretion</li> <li>Urine culture</li> <li>Culture from susp. source</li> <li>Diagnostic imaging of susp. source</li> <li>Renewing oldest diagnostic imaging of susp. source</li> </ul> | According to diagnostic imaging and clinical judgment | <ol style="list-style-type: none"> <li>Pip/Tazo<sup>d</sup> 4gx3 iv or Meropenem 1gx3 iv</li> <li>Ciprofloxacin 400 mg x 2 i.v.</li> <li>Metronidazol 500 mg x 2 i.v.</li> <li>Fluconazol 400 mg x 2 i.v.</li> <li>Vancomycin, dosage acc.to. Se-Vanco<sup>e</sup></li> </ol>                        |
| <b>CATEGORY 4</b>  | Nothing further                                                                                                                                                                                                                                               | Standard-of-care approach                             | Continue present treatment                                                                                                                                                                                                                                                                           |
| <b>CATEGORY 5</b>  | Nothing further                                                                                                                                                                                                                                               | Standard-of-care approach                             | Re-consider the indication for antibiotics (standard-of-care principle)                                                                                                                                                                                                                              |

<sup>a</sup> 'Alert PCT' is defined as PCT-day1  $\geq$  PCT day 0 x 0.9. So a decrease in PCT from 11,2 ng/ml to 10,5 ng/ml is an "irrelevant decrease" and is defined as an "Alert" PCT. <sup>b</sup> DDD = Defined Daily Dosages). N.B.: The mentioned dosages are examples. Dosing regimen and frequency is prescribed according to the department guidelines (according to weight, kidney function, haemodialysis, Continuous dialysis etc.). <sup>c</sup> Antimicrobial spectrum covered can be broader than suggested (discretion of investigator). Administration of antimicrobials with a narrower spectrum on Alert-PCT days, should only take place when any antimicrobial treatment covering the suggested spectrum is contra-indicated and such a therapy should always be discussed and accepted by the coordinating centre. <sup>d</sup> Pip/Tazo: piperacillin/tazobactam. <sup>e</sup> Se-Vanco: serum-vancomycin measurements
