# Supplementary material for: Kidney failure related to broad-spectrum antibiotics in critically ill patients: secondary end point results from a 1200 patient randomised trial
Source: PubMed Central journal article supplement — BMJ Open. 2012 Mar 11;2(2):e000635. doi: 10.1136/bmjopen-2011-000635 (PMC3307126; doi:10.1136/bmjopen-2011-000635), 2012-03-11
Supplement: bmjopen-2011-000635-s9.pdf [file bmjopen-2011-000635-s9.pdf]

**Supplementary Table 1. Baseline characteristics of the study participants.**

|                                                   | 'Standard exposure'<br>group (n=596) | 'High exposure'<br>group (n=604) | Overall (n=1200)  |
|---------------------------------------------------|--------------------------------------|----------------------------------|-------------------|
| Age, years - median (IQR)                         | 67 (58–75)                           | 67 (58–76)                       | 67 (58–76)        |
| Male sex – no. (%)                                | 333 (55.9%)                          | 330 (54.6%)                      | 663 (55.3%)       |
| Body Mass Index, kg/m <sup>2</sup> – median (IQR) | 24.7 (22.0–27.8)                     | 25.0 (22.5–28.7)                 | 24.8 (22.2–27.9)  |
| APACHE II Score - median (IQR)                    | 18 (13–24)                           | 18 (13–25)                       | 18 (13–24)        |
| <b>Chronic co-morbidity* - no. (%)</b>            |                                      |                                  |                   |
| No chronic co-morbidities                         | 102 (17.1)                           | 123 (20.4)                       | 225 (18.8)        |
| <b>Kidney function and electrolytes</b>           |                                      |                                  |                   |
| Creatinin, µmol/L - median (IQR)                  | 119 (78, 197)                        | 119 (75, 208)                    | 119 (76, 202)     |
| eGFR, mL/min/1.73m <sup>2</sup> – median (IQR)    | 51.4 (29.2, 80.5)                    | 49.4 (25.4, 82.6)                | 50.2 (27.1, 81.5) |
| Carbamid, mmol/L - median (IQR)                   | 10.3 (6.5, 17.0)                     | 10.6 (6.3, 18.1)                 | 10.5 (6.4, 17.4)  |
| Na <sup>+</sup> , mmol/l - median (IQR)           | 138 (134, 141)                       | 137 (134, 141)                   | 138 (134, 141)    |
| K <sup>+</sup> , mmol/l - median (IQR)            | 4.0 (3.7, 4.4)                       | 4.0 (3.6, 4.5)                   | 4.0 (3.6, 4.4)    |
| pH - median (IQR)                                 | 7.29 (7.21–7.39)                     | 7.29 (7.20–7.38)                 | 7.29 (7.20–7.38)  |
| Dialysis required, patients (%)                   | 88 (14.8%)                           | 86 (14.2%)                       | 174 (14.5%)       |
| <b>Indicators of severity (non-renal)</b>         |                                      |                                  |                   |
| Temperature, °C - median (IQR)                    | 37.2 (36.4–38.0)                     | 37.3 (36.5–38.1)                 | 37.3 (36.4–38.0)  |
| Mean arterial pressure, mmHg - median (IQR)       | 71 (60–84)                           | 72 (63–85)                       | 71 (62–84)        |
| Heart frequency - median (IQR)                    | 100 (82–116)                         | 100 (84–117)                     | 100 (83–117)      |
| Need for vasopressor/inotropic drug† - n (%)      | 315 (52.9)                           | 326 (53.4)                       | 641 (53.4)        |
| Mechanical ventilation used - n (%)               | 401 (67.3%)                          | 401 (66.4%)                      | 802 (66.8%)       |
| <b>Biomarkers</b>                                 |                                      |                                  |                   |
| Alert-PCT § – no. (%)                             | 279 (47.0)                           | 312 (51.7)                       | 591 (49.4)        |
| Leukocytes, x10 <sup>9</sup> – median (IQR)       | 13.0 (8.8–18.1)                      | 12.4 (8.0–18.1)                  | 12.8 (8.4–18.1)   |
| C-reactive protein, mg/L – median (IQR)           | 131 (40–234)                         | 137 (40–253)                     | 135 (40–241)      |

Interquartile range (IQR). Acute Physiology and Chronic Health Evaluation II score (APACHE II) ranges from 0 to 71. \*Chronic co-morbidity: Earlier diagnosed via hospital admission: heart failure, lung disease, cancer, diabetes, alcohol abuse, chronic infection, neurological disease, renal diseases, liver disease, gastrointestinal disease, autoimmune disease, cancer and psychiatric disorders. †Vasopressors/inotropic drugs are considered to be epinephrine, nor-epinephrine, dopamine and dobutamine. ‡ Infections were rated according to the ACCP/SCCM definitions; investigators were trained in using them. §Alert-PCT: Procalcitonin-level not decreasing by at least 10% from the previous day and above 1.0 ng/ml. If only one measurement is available: Absolute procalcitonin-level above 1.0 ng/ml. A comprehensive baseline table is available in the primary publication from this material<sup>13</sup>.

| <b>Supplementary Table 2. Consumption of antimicrobials during follow-up</b>                                                                                                                                                                                                                                                                                                                                                                                                                                                |                              |                          |         |
|-----------------------------------------------------------------------------------------------------------------------------------------------------------------------------------------------------------------------------------------------------------------------------------------------------------------------------------------------------------------------------------------------------------------------------------------------------------------------------------------------------------------------------|------------------------------|--------------------------|---------|
|                                                                                                                                                                                                                                                                                                                                                                                                                                                                                                                             | Standard exposure<br>(n=596) | High exposure<br>(n=604) | p-value |
| <b>Consumption of antimicrobials</b>                                                                                                                                                                                                                                                                                                                                                                                                                                                                                        |                              |                          |         |
| Pip/tazo used within 28 days (DDD)                                                                                                                                                                                                                                                                                                                                                                                                                                                                                          | 1893                         | 2925                     | -       |
| Proportion of days <sup>a</sup> followed where Pip/tazo was used                                                                                                                                                                                                                                                                                                                                                                                                                                                            | 0.00 (0.00 – 0.33)           | 0.11 (0.00 – 0.56)       | <0.001  |
| Meropenem used within 28 days (DDD)                                                                                                                                                                                                                                                                                                                                                                                                                                                                                         | 2174                         | 2480                     | -       |
| Proportion of days <sup>a</sup> followed where meropenem was used                                                                                                                                                                                                                                                                                                                                                                                                                                                           | 0.00 (0.00 – 0.00)           | 0.00 (0.00 – 0.07)       | 0.23    |
| Cefuroxim used within 28 days (DDD)                                                                                                                                                                                                                                                                                                                                                                                                                                                                                         | 4369                         | 3390                     | -       |
| Proportion of days <sup>a</sup> followed where cefuroxim was used                                                                                                                                                                                                                                                                                                                                                                                                                                                           | 0.11 (0.00 – 0.39)           | 0.04 (0.00 – 0.29)       | <0.001  |
| Ciprofloxacin used within 28 days (DDD)                                                                                                                                                                                                                                                                                                                                                                                                                                                                                     | 6210                         | 8382                     | -       |
| Proportion of days <sup>a</sup> followed where ciprofloxacin was used                                                                                                                                                                                                                                                                                                                                                                                                                                                       | 0.21 (0.00 – 0.71)           | 0.33 (0.04 – 0.88)       | <0.001  |
| Number (%) ICU days spent with at least three antimicrobials                                                                                                                                                                                                                                                                                                                                                                                                                                                                | 2721 (57.7%)                 | 3570 (65.5%)             | 0.002   |
| <p>ICU: Intensive care unit. <sup>a</sup>This comparison was made with complete follow-up for 28 days (if patients were discharged from ICU, they were followed for antimicrobial use in all hospital admissions in Denmark).<br/> Pip/tazo: piperacillin/tazobactam. DDD: Defined Daily Dose administered within day 1-28. Parts of this table is also available in the primary publication on this material<sup>13</sup>. It is included in the present report since it is crucial for interpretation of the results.</p> |                              |                          |         |





**Supplementary table 3: Cox proportional hazards models investigating predictors of mortality after ten days**

| Variable                                                                        | Unadjusted analysis      |         | Multivariable analysis   |         |
|---------------------------------------------------------------------------------|--------------------------|---------|--------------------------|---------|
|                                                                                 | Hazard ratio<br>(95% CI) | P-value | Hazard ratio<br>(95% CI) | P-value |
| Treatment arm (‘High exposure vs. ‘Standard exposure)                           | 0.97 (0.72, 1.31)        | 0.86    | 0.93 (0.69, 1.26)        | 0.63    |
| Hospital:                                                                       |                          |         |                          |         |
| 1                                                                               | Ref                      | 0.11    | Ref                      | 0.37    |
| 2                                                                               | 0.63 (0.19, 2.05)        |         | 0.50 (0.15, 1.66)        |         |
| 3                                                                               | 0.54 (0.17, 1.75)        |         | 0.49 (0.15, 1.63)        |         |
| 4                                                                               | 0.86 (0.26, 2.81)        |         | 0.65 (0.19, 2.21)        |         |
| 5                                                                               | 0.56 (0.16, 1.88)        |         | 0.45 (0.13, 1.56)        |         |
| 6                                                                               | 0.71 (0.21, 2.37)        |         | 0.63 (0.18, 2.12)        |         |
| 7                                                                               | 0.79 (0.23, 2.72)        |         | 0.66 (0.18, 2.40)        |         |
| 8                                                                               | 0.43 (0.11, 1.53)        |         | 0.34 (0.09, 1.26)        |         |
| 9                                                                               | 0.23 (0.05, 1.02)        |         | 0.27 (0.06, 1.26)        |         |
| Gender (Female vs. Male)                                                        | 0.80 (0.59, 1.08)        | 0.14    | 0.77 (0.57, 1.05)        | 0.10    |
| Age (≥65 years vs. <65 years)                                                   | 1.96 (1.42, 2.69)        | <0.0001 | 1.86 (1.34, 2.58)        | <0.0001 |
| APACHE II score (≥20 vs. <20)                                                   | 1.77 (1.31, 2.39)        | <0.0001 | 1.35 (0.98, 1.87)        | 0.07    |
| Infection at baseline (Severe Sepsis or septic shock vs Milder or no infection) | 1.31 (0.97, 1.76)        | 0.08    | 1.17 (0.84, 1.64)        | 0.35    |
| Surgical patient (Yes vs. No)                                                   | 0.78 (0.57, 1.06)        | 0.11    | 0.76 (0.55, 1.05)        | 0.09    |
| Date recruited (01/01/08 to 02/06/09 vs. 09/01/06 to 31/12/07)                  | 1.11 (0.81, 1.53)        | 0.50    | 1.18 (0.84, 1.67)        | 0.34    |
| eGFR ever <30 mL/min/1.73 m <sup>2</sup> over the first ten days (Yes vs. No)   | 1.81 (1.34, 2.45)        | <0.0001 | 1.47 (1.06, 2.04)        | 0.02    |
