# Supplementary material for: Kidney failure related to broad-spectrum antibiotics in critically ill patients: secondary end point results from a 1200 patient randomised trial
Source: PubMed Central journal article supplement — BMJ Open. 2012 Mar 11;2(2):e000635. doi: 10.1136/bmjopen-2011-000635 (PMC3307126; doi:10.1136/bmjopen-2011-000635), 2012-03-11
Supplement: bmjopen-2011-000635-s10.pdf [file bmjopen-2011-000635-s10.pdf]

**Table T1: Cox proportional hazards models investigating predictors of 'all cause' mortality on day 7-28**

| Variable                                                     | Unadjusted analysis      |            |                          | Multivariable analysis   |            |  |
|--------------------------------------------------------------|--------------------------|------------|--------------------------|--------------------------|------------|--|
|                                                              | Hazard ratio<br>(95% CI) | P-value    | Hazard ratio<br>(95% CI) | Hazard ratio<br>(95% CI) | P-value    |  |
| Gender (Male vs. Female)                                     | 1.31 (0.99, 1.75)        | 0.06       | 1.30 (0.97, 1.73)        |                          | 0.08       |  |
| Age ( $\geq 65$ years vs. $< 65$ years)                      | 1.90 (1.41, 2.55)        | $< 0.0001$ | 1.78 (1.31, 2.42)        |                          | $< 0.0001$ |  |
| APACHE II score ( $\geq 25$ vs. $< 25$ )                     | 1.67 (1.24, 2.25)        | 0.001      | 1.29 (0.94, 1.76)        |                          | 0.12       |  |
| Severe Sepsis/septic shock vs. Milder or no infection)       | 1.29 (0.97, 1.72)        | 0.08       | 1.31 (0.97, 1.76)        |                          | 0.08       |  |
| Surgical patient (Yes vs. No)                                | 0.58 (0.41, 0.82)        | 0.002      | 0.54 (0.38, 0.77)        |                          | 0.001      |  |
| Cancer (Yes vs. No)                                          | 1.19 (0.79, 1.79)        | 0.41       | NI                       |                          | -          |  |
| Charlson score ( $\geq 2$ vs. $< 2$ )                        | 1.69 (1.28, 2.24)        | $< 0.0001$ | 1.68 (1.22, 2.30)        |                          | 0.001      |  |
| eGFR $< 60$ mL/min/1.73 m <sup>2</sup> on day 7 (Yes vs. No) | 2.20 (1.66, 2.92)        | $< 0.0001$ | 2.29 (1.58, 3.34)        |                          | $< 0.0001$ |  |

eGFR: estimated glomerular filtration rate; APACHE II: Acute Physiology And Chronic Health Evaluation II; NI: Not Included. Only patients who survived until day 7 were included in this analysis. Forward censoring was applied and variables with  $p < 0.2$  in the univariate analysis were entered into the multivariate model. If a creatinine measurement was not available on day 7, the last measured creatinine on day 1-6 was used. To not let hydration influence the eGFR estimations, baseline body weight was used for all daily eGFR estimations (so eGFR was a first degree function of measured creatinine for each patient). The analysis was stratified for baseline eGFR ( $< 30$  mL/min/1.73 m<sup>2</sup>, 30-60 mL/min/1.73 m<sup>2</sup>,  $> 60$  mL/min/1.73 m<sup>2</sup>). In a sensitivity analysis, not stratifying for baseline eGFR did not alter the signal.
