# Supplementary material for: Kidney failure related to broad-spectrum antibiotics in critically ill patients: secondary end point results from a 1200 patient randomised trial
Source: PubMed Central journal article supplement — BMJ Open. 2012 Mar 11;2(2):e000635. doi: 10.1136/bmjopen-2011-000635 (PMC3307126; doi:10.1136/bmjopen-2011-000635), 2012-03-11
Supplement: bmjopen-2011-000635.draft_revisions.pdf [file bmjopen-2011-000635.draft_revisions.pdf]

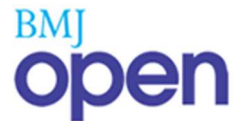

**Kidney failure related to broad-spectrum antibiotics in critically ill patients: secondary end point results from a 1200 patient randomized trial**

|                               |                                                                                                                                                                                                                                                                                                                                                                                                                                                                                                                                                                                                                                                                                                                                                                                                                                                                                                                                                                                                                                                                                                                                                                                                                                                                                                                                                                                                                                                                                                                                                                                                                                                                                                                                                                                                                                                                                                                                                                                                                                                                                                                                                                                                                                                                                                                      |
|-------------------------------|----------------------------------------------------------------------------------------------------------------------------------------------------------------------------------------------------------------------------------------------------------------------------------------------------------------------------------------------------------------------------------------------------------------------------------------------------------------------------------------------------------------------------------------------------------------------------------------------------------------------------------------------------------------------------------------------------------------------------------------------------------------------------------------------------------------------------------------------------------------------------------------------------------------------------------------------------------------------------------------------------------------------------------------------------------------------------------------------------------------------------------------------------------------------------------------------------------------------------------------------------------------------------------------------------------------------------------------------------------------------------------------------------------------------------------------------------------------------------------------------------------------------------------------------------------------------------------------------------------------------------------------------------------------------------------------------------------------------------------------------------------------------------------------------------------------------------------------------------------------------------------------------------------------------------------------------------------------------------------------------------------------------------------------------------------------------------------------------------------------------------------------------------------------------------------------------------------------------------------------------------------------------------------------------------------------------|
| Journal:                      | <i>BMJ Open</i>                                                                                                                                                                                                                                                                                                                                                                                                                                                                                                                                                                                                                                                                                                                                                                                                                                                                                                                                                                                                                                                                                                                                                                                                                                                                                                                                                                                                                                                                                                                                                                                                                                                                                                                                                                                                                                                                                                                                                                                                                                                                                                                                                                                                                                                                                                      |
| Manuscript ID:                | bmjopen-2011-000635                                                                                                                                                                                                                                                                                                                                                                                                                                                                                                                                                                                                                                                                                                                                                                                                                                                                                                                                                                                                                                                                                                                                                                                                                                                                                                                                                                                                                                                                                                                                                                                                                                                                                                                                                                                                                                                                                                                                                                                                                                                                                                                                                                                                                                                                                                  |
| Article Type:                 | Research                                                                                                                                                                                                                                                                                                                                                                                                                                                                                                                                                                                                                                                                                                                                                                                                                                                                                                                                                                                                                                                                                                                                                                                                                                                                                                                                                                                                                                                                                                                                                                                                                                                                                                                                                                                                                                                                                                                                                                                                                                                                                                                                                                                                                                                                                                             |
| Date Submitted by the Author: | 17-Nov-2011                                                                                                                                                                                                                                                                                                                                                                                                                                                                                                                                                                                                                                                                                                                                                                                                                                                                                                                                                                                                                                                                                                                                                                                                                                                                                                                                                                                                                                                                                                                                                                                                                                                                                                                                                                                                                                                                                                                                                                                                                                                                                                                                                                                                                                                                                                          |
| Complete List of Authors:     | <p>Jensen, Jens-Ulrik; Faculty of Health Sciences, University of Copenhagen, Copenhagen HIV Programme; University Hospital of Copenhagen, Bispebjerg, Pulmonary Medicine (L)</p> <p>Hein, Lars; Copenhagen University Hospital Hillerød, Department of Anesthesia and Intensive Care; Copenhagen University Hospital Glostrup, Department of Anesthesia and Intensive Care</p> <p>Lundgren, Bettina; University Hospital of Copenhagen Rigshospitalet, Diagnostic Centre</p> <p>Bestle, Morten; Copenhagen University Hospital Hillerød, Department of Anesthesia and Intensive Care</p> <p>Mohr, Thomas; Copenhagen University Hospital Gentofte, Department of Anesthesia and Intensive Care</p> <p>Andersen, Mads; Aarhus University Hospital in Skejby, Department of Anesthesia and Intensive Care</p> <p>Thornberg, Klaus; Copenhagen University Hospital Gentofte, Department of Anesthesia and Intensive Care</p> <p>Løken, Jesper; Copenhagen University Hospital Hvidovre, Department of Anesthesia and Intensive Care</p> <p>Steensen, Morten; Copenhagen University Hospital Hvidovre, Department of Anesthesia and Intensive Care</p> <p>Fox, Zoë; Royal Free Hospital School of Medicine in London, Research Department of Infection and Population Health; University of Copenhagen, Faculty of Health Sciences, Copenhagen HIV Programme</p> <p>Tousi, Hamid; Copenhagen University Hospital Herlev, Department of Anesthesia and Intensive Care</p> <p>Søe-Jensen, Peter; Copenhagen University Hospital Herlev, Department of Anesthesia and Intensive Care</p> <p>Lauritsen, Anne; Copenhagen University Hospital Glostrup, Department of Anesthesia and Intensive Care</p> <p>Strange, Ditte; Copenhagen University Hospital Glostrup, Department of Anesthesia and Intensive Care</p> <p>Reiter, Nanna; University Hospital in Roskilde, Department of Anesthesia and Intensive Care</p> <p>Thormar, Katrin; Copenhagen University Hospital Gentofte, Department of Anesthesia and Intensive Care</p> <p>Fjeldbord, Paul; Aarhus University Hospital in Skejby, Department of Anesthesia and Intensive Care</p> <p>Larsen, Kim; Aarhus University Hospital in Aarhus, Department of Anesthesia and Intensive Care</p> <p>Drenck, Niels-Erik; University Hospital in Roskilde, Department of</p> |

|                                 |                                                                                                                                                                                                                                                                                                                                                                                                                                                                                                                                                                                                                                                                                                    |
|---------------------------------|----------------------------------------------------------------------------------------------------------------------------------------------------------------------------------------------------------------------------------------------------------------------------------------------------------------------------------------------------------------------------------------------------------------------------------------------------------------------------------------------------------------------------------------------------------------------------------------------------------------------------------------------------------------------------------------------------|
|                                 | Anesthesia and Intensive Care<br>Østergaard, Christian; Copenhagen University Hospital Hvidovre, Clinical Microbiology<br>Johansen, Maria; University of Copenhagen, Faculty of Health Sciences, Copenhagen HIV Programme<br>Nielsen, Lene; University of Copenhagen, Faculty of Health Sciences, Copenhagen HIV Programme<br>Kjær, Jesper; University of Copenhagen, Faculty of Health Sciences, Copenhagen HIV Programme<br>Grarup, Jesper; University of Copenhagen, Faculty of Health Sciences, Copenhagen HIV Programme<br>Lundgren, Jens; University of Copenhagen, Faculty of Health Sciences, Copenhagen HIV Programme; Copenhagen University Hospital Rigshospitalet, Infectious Diseases |
| <b>Primary Subject Heading</b>: | Infectious diseases                                                                                                                                                                                                                                                                                                                                                                                                                                                                                                                                                                                                                                                                                |
| Secondary Subject Heading:      | Renal medicine, Intensive care, Patient-centred medicine, Pharmacology & therapeutics                                                                                                                                                                                                                                                                                                                                                                                                                                                                                                                                                                                                              |
| Keywords:                       | Adult intensive & critical care < ANAESTHETICS, Acute renal failure < NEPHROLOGY, Adverse events < THERAPEUTICS, Toxicity < THERAPEUTICS, Clinical trials < THERAPEUTICS                                                                                                                                                                                                                                                                                                                                                                                                                                                                                                                           |
|                                 |                                                                                                                                                                                                                                                                                                                                                                                                                                                                                                                                                                                                                                                                                                    |

SCHOLARONE™  
Manuscripts

Review only

1  
2  
3 Kidney failure related to broad-spectrum antibiotics in critically ill  
4  
5  
6 patients: secondary end point results from a 1200 patient randomized trial  
7

8  
9 Corresponding author Jens-Ulrik Jensen, Copenhagen HIV Programme, The Panum Institute,  
10  
11 Faculty of Health Sciences, University of Copenhagen, Blegdamsvej 3B, DK-2200 Copenhagen N,  
12  
13 [juj@cphiv.dk](mailto:juj@cphiv.dk)  
14

15 Jens Ulrik Jensen *medical doctor*<sup>1,2</sup>, Lars Hein *anaesthetist*<sup>3,4</sup>, Bettina Lundgren *centre director*,  
16  
17 *hospital diagnostic centre*<sup>2,5</sup>, Morten Heiberg Bestle *anaesthetist*<sup>4</sup>, Thomas Mohr *anaesthetist*<sup>6</sup>,  
18  
19 Mads Holmen Andersen *anaesthetist*<sup>7</sup>, Klaus Julius Thornberg *anaesthetist*<sup>6</sup>, Jesper Løken  
20  
21 *anaesthetist*<sup>8</sup>, Morten Steensen *anaesthetist*<sup>8</sup>, Zoe Fox *biostatistician*<sup>1,9</sup>, Hamid Tousi *anaesthetist*<sup>10</sup>,  
22  
23 Peter Søe-Jensen *anaesthetist*<sup>10</sup>, Anne Øberg Lauritsen *anaesthetist*<sup>3</sup>, Ditte Gry Strange  
24  
25 *anaesthetist*<sup>3</sup>, Nanna Reiter *anaesthetist*<sup>11</sup>, Katrin Thormar *anaesthetist*<sup>6</sup>, Paul Christian Fjeldborg  
26  
27 *anaesthetist*<sup>7</sup>, Kim Michael Larsen *anaesthetist*<sup>12</sup>, Niels-Erik Drenck *anaesthetist*<sup>11</sup> Maria Egede  
28  
29 Johansen *junior research associate*<sup>1</sup>, Lene Ryom *junior research executive*<sup>1</sup>, Christian Østergaard  
30  
31 *senior research executive*<sup>2,13</sup>, Jesper Kjær *database manager*<sup>1</sup>, Jesper Grarup *administrative leader*  
32  
33 <sup>1</sup>, Jens D. Lundgren *professor of infectious diseases*<sup>1,14</sup> of the The Procalcitonin And Survival  
34  
35 Study (PASS) Group\*.  
36  
37

38  
39 <sup>1</sup>Copenhagen HIV Programme at the University of Copenhagen; <sup>2</sup>Department of Clinical  
40  
41 Microbiology at Copenhagen University Hospital Hvidovre; <sup>3</sup>Department of Anesthesia and  
42  
43 Intensive Care at Copenhagen University Hospital Glostrup; <sup>4</sup>Department of Anesthesia and  
44  
45 Intensive Care at Copenhagen University Hospital Hillerød; <sup>5</sup>Diagnostic Centre at Copenhagen  
46  
47 University Hospital Rigshospitalet; <sup>6</sup>Department of Anesthesia and Intensive Care at Copenhagen  
48  
49 University Hospital Gentofte; <sup>7</sup>Department of Anesthesia and Intensive Care at Aarhus University  
50  
51 Hospital in Skejby; <sup>8</sup>Department of Anesthesia and Intensive Care at Copenhagen University  
52  
53 Hospital Hvidovre; <sup>9</sup>Royal Free Hospital School of Medicine in London; <sup>10</sup>Department of  
54  
55  
56  
57  
58  
59  
60

1  
2  
3 Anesthesia and Intensive Care at Copenhagen University Hospital Herlev; <sup>11</sup>Department of  
4  
5 Anesthesia and Intensive Care at Copenhagen University Hospital in Roskilde; <sup>12</sup>Department of  
6  
7 Anesthesia and Intensive Care at Aarhus University Hospital in Aarhus; <sup>13</sup>Department of Clinical  
8  
9 Microbiology at Copenhagen University Hospital Herlev; <sup>14</sup>Department of Infectious Diseases at  
10  
11 Copenhagen University Hospital Rigshospitalet. All except<sup>9</sup> are from Denmark. <sup>9</sup> is from England.

12  
13  
14 \*Participating investigators are listed in the appendix.

15  
16 Running Title: Broad-Spectrum Antibiotics and Renal Failure in Critically Ill Patients

17  
18 Keywords: Antibiotics – Renal Failure – Sepsis – Intensive Care  
19

20  
21  
22 **Copyright:** The Corresponding Author has the right to grant on behalf of all authors and does grant  
23  
24 on behalf of all authors, an exclusive licence (or non exclusive for government employees) on a  
25  
26 worldwide basis to the BMJ Publishing Group Ltd and its licensees , to permit this article (if  
27  
28 accepted) to be published in BMJ editions and any other BMJPG products and to exploit all  
29  
30 subsidiary rights, as set out in our licence.  
31  
32

### 33 34 35 36 37 38 Summary:

#### 39 40 Article Focus:

- 41 • To determine whether high exposure to beta-lactam, carbapenem and fluor-quinolone antibiotics leads to renal failure in intensive care patients
- 42 • If renal failure is observed: To determine whether this renal failure is caused by antibiotics as a class of drugs or rather if one antibiotic or a certain combination leads to
- 43 this renal failure.
- 44

#### 45 46 Key messages:

- 47 • Patients randomised to 'high exposure' to antibiotics in the intensive care unit had substantially increased time with renal failure
- 48 • Patients who had piperacillin/tazobactam administered suffered the slowest rate of renal function recovery of all antibiotics tested.
- 49 • Adjustment for potential confounders did not change this signal and all sensitivity analyses also confirmed the findings. After discontinuation of piperacillin/tazobactam,
- 50 renal function recovered with a rapid pace, indicating a reversible nephrotoxicity.
- 51

#### 52 53 Strengths and Limitations:

- 54 • The randomised design, sample size of 1200 patients, Good Clinical Practice monitoring with high follow-up rates and broad eligibility criteria are powerful means of
- 55 avoiding bias, confounding, and coincidental variation, and to assure a high external validity of the results.
- 56 • The study was, however, a secondary analysis. To compensate for this limitation, a detailed analysis plan was made before starting the study. Additionally, in the original
- 57 protocol, analyses of renal function in the two arms was already planned.
- 58
- 59
- 60

## Abstract

**Objectives:** To determine whether a strategy of more intensive antibiotic therapy with antibiotics not normally considered to be nephrotoxic leads to adverse renal outcomes in intensive care patients.

**Design:** Secondary analysis from a randomized antibiotic strategy trial (the *PASS study*). The randomized arms were conserved from the primary trial for the main analysis.

**Setting:** Nine mixed surgical/medical intensive care units across Denmark.

**Participants:** 1200 adult intensive care patients, 18 years or older, who were expected to stay more than 24 hours. Exclusion criteria were known extreme bilirubin >40 mg/dL or triglycerides >1000 mg/dL, patients at an increased risk from blood sampling, pregnant or breast feeding and persons held by force (psychiatric).

**Interventions:** Patients were randomized either to guideline-based therapy ('standard-exposure'-arm), or to guideline-based therapy supplemented with antibiotic escalation whenever procalcitonin increased ('high-exposure'-arm), according to daily measurements of this biomarker.

**Main outcome measures:** Renal failure, as defined by 1) RIFLE criteria, 2) estimated Glomerular Filtration Rate (eGFR) increase after administration of a certain drug, 3) eGFR <60 ml/min/1.73 m<sup>2</sup> ('ever' or 'total time') until day 28. Analysis was by intention to treat.

**Results:** 28-day mortality was 31.8% and comparable (Jensen et al, CCM 2011). A total of 3672/7634 (48.1%) study days during follow-up in the "high-exposure" vs. 3016/6949 (43.4%) in the 'standard-exposure'-arm were spent with eGFR <60 ml/min/1.73m<sup>2</sup>, p<0.001. In a multiple effects model, piperacillin/tazobactam was identified as causing the lowest rate of renal recovery of all antibiotics: 1.0 ml/min/m<sup>2</sup> per 24h while exposed to this drug [95% CI: 0.7 – 1.3 ml/min/m<sup>2</sup>/24h] vs. meropenem: 2.9 ml/min/m<sup>2</sup>/24h [2.5 – 3.3 ml/min/m<sup>2</sup>/24h]); after discontinuing piperacillin/tazobactam, the renal recovery rate increased: 2.7 ml/min/1.73 m<sup>2</sup> /24h [2.3 – 3.1

1  
2  
3 ml/min/1.73 m<sup>2</sup> /24h]. eGFR<60 ml/min/1.73m<sup>2</sup> in the two groups at entry and at last day of  
4  
5 follow-up was 57% vs. 55% and 41% vs. 39%, resp.  
6

7 **Conclusions:** Piperacillin/tazobactam was identified as a cause of delayed renal recovery in  
8  
9 critically ill patients. This nephrotoxicity was not observed when using other beta-lactam  
10  
11 antibiotics. It remains unclear, whether such a nephrotoxic effect is also present in non-critically ill  
12  
13 patients.  
14

15  
16 **Trial registration** ClinicalTrials.gov identifier NCT00271752.  
17  
18

## 19 20 21 **Introduction** 22

23  
24 Frequent complications to sepsis are organ failure, especially respiratory failure and renal failure<sup>1-3</sup>.  
25  
26 Critically ill patients are more vulnerable to organ-related drug toxicities than less severely ill  
27  
28 patients<sup>4</sup>. Randomized trials assessing safety of broad-spectrum antibiotics in intensive care settings  
29  
30 are generally scarce, do not have sufficient statistical power for assessing organ failure endpoints,  
31  
32 and do often not include defined kidney organ failure endpoints<sup>5-7</sup>. Data on renal failure endpoints  
33  
34 are also sparse in the published trials from other patient populations, and since the absolute risk of  
35  
36 renal failure is low for these patients, analyses may likely have been underpowered<sup>8-12</sup>.  
37

38  
39 To our knowledge, randomized trials comparing ‘high exposure’ vs. ‘standard exposure to  
40  
41 antibiotics’ and specifically addressing whether these interventions affect the occurrence and  
42  
43 duration of kidney failure have not been done before in intensive care settings.  
44

45  
46 In this secondary analysis from a randomized trial, the PASS study<sup>13</sup>, we aimed to investigate  
47  
48 whether a strategy of more intensive antibiotic therapy leads to adverse renal outcomes within 28  
49  
50 days after recruitment.  
51

52  
53 Secondly, if renal failure was observed from the ‘high exposure’ approach, to identify one or  
54  
55 several of the antibiotics used in this trial as the cause of such a renal failure.  
56  
57  
58  
59  
60

## Methods

### Trial design and participants

*PASS* is a multicentre randomized controlled trial in Denmark 2006-9 in 1200 adult critically ill patients, expected to stay in one of the nine participating mixed medical/surgical intensive care units  $\geq 24$  hours; the CONSORT trial diagram is displayed in figure 1. Patients were randomized 1:1 either to treatment according to international guidelines: 'standard exposure arm', or to same guidelines but supplemented with daily drug-escalation initiated upon procalcitonin increases ('high exposure'-arm); 28-day mortality was 31.8% and comparable between the two groups, as reported<sup>13</sup>.

To be eligible, patients had to be  $\geq 18$  years, enrolled within 24 hours of admission to the intensive care unit and have an expected intensive care-admission length of  $\geq 24$  hours. Patients with known bilirubin  $>40$  mg/dL and triglycerides  $>1000$  mg/dL (not suspensive) were not eligible (interference with procalcitonin measurements), as were patients who were judged to be at an increased risk from blood sampling. The inclusion criteria were broad since infection is frequent and often causes complications in the patient group and to increase the external validity of the results. The person or next of kin gave informed consent. The study protocol was approved by the regional ethics committees in Denmark (H-KF-272-753) and adheres to the Helsinki declaration, revised in Seoul 2008.

In the present analyses we explored presence and duration of renal failure as well as change in renal function during the observed time. Endpoints are defined in *statistical analysis* below. Patients were followed until day 28. The primary trial protocol and the analysis plan is available in the online supplement. Analysis was by intention to treat: NCT00271752.

### Randomization and masking

Randomization was performed 1:1 using a computerized algorithm created by the database manager (JK) with concealed block-size, pre-stratified for site of recruitment, initial APACHE-II and age

1  
2  
3 (entered in an encrypted screening form in a password protected website); investigators were  
4  
5 masked to assignment before, but not after, randomization. All investigators were trained by the  
6  
7 coordinating centre and had to register in an investigator-database. Investigators, treating physicians  
8  
9 and the coordinator were unaware of outcomes during the study, as were they of all procalcitonin  
10  
11 measurements in the 'standard exposure' (control)-group.  
12  
13

### 14 15 16 **Antibiotic therapy in the two arms**

17  
18 The investigators enrolled participants and assigned the 'high exposure group' participants to the  
19  
20 intervention. In the 'standard exposure' group, the antimicrobial treatment was guided according to  
21  
22 current clinical guidelines<sup>14</sup>, based on clinical assessment, microbiology and radiology among other  
23  
24 parameters, as described elsewhere<sup>13</sup>  
25  
26

27  
28 In the 'high exposure' group, the use of antimicrobial interventions was guided by the same clinical  
29  
30 guidelines as in the 'standard exposure' group to ascertain the best standard of care therapy for all  
31  
32 patients, and additionally antimicrobial interventions were initiated whenever procalcitonin levels  
33  
34 were not decreasing at a pre-defined pace (figure 2) and diagram D1 in the online supplement where  
35  
36 a site-adjusted local guideline is displayed.  
37  
38  
39

### 40 41 **Measurements, data collection and follow-up**

42  
43 Blood samples for biomarker measurement were made daily in the intensive care unit, beginning  
44  
45 immediately after randomization. The assay used was the Kryptor®-PCT. Organ failure and  
46  
47 antibiotic exposure was followed up for until 28 days or death, as described<sup>13</sup>. Good Clinical  
48  
49 Practice guidelines were applied. The regional ethics board approved the protocol (H-KF-01-272-  
50  
51 753).  
52  
53  
54  
55  
56  
57  
58  
59  
60



### Statistical analysis

Analyses for renal failure endpoints were divided into: I) dichotomous endpoints to explore whether renal failure emerged during therapy with the investigated antibiotics and II) quantitative endpoints to explore whether existing renal failure was prolonged during therapy. Dichotomous endpoints were: 1) RIFLE-criteria ‘R’, ‘I’ and ‘F’ [www.adqi.net](http://www.adqi.net), 2) ‘ever’ eGFR<30 or 60 ml/min/1.73m<sup>2</sup>, 3) ‘ever’ blood-urea level ≥20 mmol/L. Quantitative endpoints were based on the time lived with eGFR<30 or 60 ml/min/1.73m<sup>2</sup> and the day-to-day change in eGFR.

The multiple effects eGFR ‘slope’ analyses, were adjusted for the following variables: treatment arm (‘high exposure’ vs. ‘standard exposure’), age (≥65 vs. <65 years), gender, baseline APACHE II score (≥20 vs. <20), degree of host response/infection at baseline (severe sepsis/septic shock vs. milder or no infection as defined<sup>15</sup>), the eGFR at initiation of the investigated antibiotic, and finally, whether the patient at baseline was considered to be ‘surgical’ or ‘medical’.

Comparisons were made between treatment arms using Students t-tests (for normal distributed continuous data) and Mann-Whitney U-tests (for non-normally distributed continuous data). Chi-squared tests and logistic regression models were used to test categorical variables. Time-to-event analyses comparing the ‘high exposure’ group with the ‘standard exposure’ group were performed using Kaplan-Meier plots and Cox proportional hazards models. Interactions were explored whenever an interaction could be rationally expected according to background literature, for the multivariate models performed. Statistical analyses were performed using STATA Version 10.2, and SAS version 9.1. All reported p-values are 2-sided using a level of significance of 0.05.

### Sample size

For the present hypothesis, two sample size calculations were performed; one for a chi-square for equal proportions analysis for the originally randomized arms, and one for a multivariable logistic regression analysis, both with a limit for type I error of 5% and a power to avoid type II error of

1  
2  
3 80%. For the chi-square analysis, using a premise of the endpoint occurring in 20% of patients in  
4  
5 the 'standard exposure' group and with 1200 patients randomized, a detection limit (one-sided) for  
6  
7 relative risk of 1.3 in the 'high exposure' group was established. For the multivariate approach, the  
8  
9 summed squared correlations ( $\Sigma\rho^2$ ) to the risk of the antibiotic drug investigated, was set to 0.3.  
10  
11 The frequency of the endpoint in the 'standard exposure' group and the sample size were set as for  
12  
13 the chi-square analysis and the frequency of the exposure was set at 30%, which resulted in a  
14  
15 detection limit for odds ratio of  $\geq 1.5$  (or  $\leq 0.67$ ).  
16  
17  
18  
19  
20

## 21 **Results**

### 22 **Baseline characteristics**

23  
24  
25 Nine sites included 1200 persons between 09/01/06 and 02/06/09. Eighty-three percent of the  
26  
27 patients were assessed by the investigator to have an infection at baseline and 81% of the patients  
28  
29 suffered from chronic co-morbidity. Table 1 briefly summarizes baseline characteristics. Mortality  
30  
31 was comparable between the two groups, as reported<sup>13</sup>.  
32  
33  
34  
35  
36

### 37 **Follow-up**

38  
39 Follow-up for renal measures during the 28-day study period was made on 9,348 days in the  
40  
41 'standard-exposure' group of 10,755 days alive and admitted to hospital (86.9%) vs. 9,866 of  
42  
43 11,380 days in the 'high exposure group' (86.7%). If time after discharge from hospital (where no  
44  
45 S-creatinine values were determined) until day 28 was included, the percentage of days with  
46  
47 assessment of renal failure was 71.2% (9,348/13,130 days) vs. 73.8% (9,866/13,377 days)."  
48  
49  
50  
51

### 52 **Use of Antibiotics**

53  
54  
55 The antibiotics used most while admitted to the ICU were piperacillin/tazobactam, cefuroxim,  
56  
57 meropenem and ciprofloxacin, and there was a substantial higher use of piperacillin/tazobactam and  
58  
59  
60

1  
2  
3 ciprofloxacin in the ‘high exposure’ arm (table 2). Vancomycin was used to a lesser extent in both  
4  
5 groups and aminoglycosides and colistin were used rarely in both groups.

6  
7 The median length of an antibiotic course was prolonged using the ‘high exposure’-algorithm (6  
8  
9 days (IQR 3, 11) vs. 4 days (IQR 3, 10),  $p=0.004$ .

### 14 **Renal failure in the originally randomized study arms**

15  
16 The % of days within day 1-28 with  $eGFR \leq 60$  ml/min/m<sup>2</sup> was 48% in the ‘high exposure’ arm vs.  
17  
18 43% in the ‘standard exposure’ arm,  $p<0.0001$ . Results in table 3 are estimated eGFR values, based  
19  
20 on actual measured S-creatinine values; results regarding days with eGFR were comparable if using  
21  
22 the ‘last observation carried forward’ approach (not shown). RIFLE-criterion ‘R’ occurred more  
23  
24 often within day 1-28 in the ‘high exposure’ arm than the ‘standard exposure’ arm: 209 patients vs.  
25  
26 170 patients,  $p=0.02$ , as did blood urea levels exceeding 20 mmol/L: 253 (43.4%) vs. 217 (37.4%),  
27  
28  $p=0.04$ .

29  
30 The frequency of renal failure on the last day of follow-up was comparable between the arms (table  
31  
32 4), underlining that the results depicted in table 3 reflect a temporary extension of duration of renal  
33  
34 failure in the “high exposure group” and furthermore that this observation is not explained by  
35  
36 premature discharge of renally incompetent patients in the ‘standard exposure’ arm.

### 43 **Glomerular Filtration Rate changes and exposure to certain antibiotics**

44  
45 Comparison of the eGFR of all patients (both study arms) for the first ten days after starting on the  
46  
47 most frequently used betalactam antibiotics showed that the slowest recovery of renal function was  
48  
49 observed in patients on piperacillin/tazobactam as compared to patients on meropenem or  
50  
51 cefuroxim (figure 3). A multiple effects model investigating the eGFR regression coefficient  
52  
53 (‘increase in eGFR’) per day on these drugs confirmed that renal recovery was lowest in patients on  
54  
55 piperacillin/tazobactam (figure 4). Of note, renal recovery seems to be low in patients exposed to  
56  
57  
58  
59  
60

1  
2  
3 cefuroxim, but as displayed in fig. 3, this drug is given to patients with a relatively normal renal  
4  
5 function (leaving few possibilities for ‘recovery’).  
6

7 For the first five days following discontinuation of these drugs, adjusting for the same variables, eGFR  
8  
9 increased: piperacillin/tazobactam, 2.7 ml/min/1.73 m<sup>2</sup> [95% CI: 2.3 – 3.1 ml/min/1.73 m<sup>2</sup>];  
10  
11 meropenem, 0.2 ml/min/1.73 m<sup>2</sup> [-0.5 – 0.9], cefuroxim, 0.0 ml/min/1.73 m<sup>2</sup> [-0.4 – 0.4].  
12

13 As a sensitivity analysis a logistic regression model with forward censoring of variables was built,  
14  
15 where the endpoint was ‘eGFR<60 ml/min/1.73 m<sup>2</sup> at day seven from study entry’. Variables were  
16  
17 included if they were associated with the endpoint with p<0.1). Patients who died or who were  
18  
19 discharged from hospital before day seven were counted with their last eGFR measurement. Use of  
20  
21 piperacillin/tazobactam for at least three days within these first seven days was found to be an  
22  
23 independent predictor of eGFR<60 ml/min/1,73 m<sup>2</sup> at day seven (OR: 1.6 [95% CI: 1.1 – 2.4]),  
24  
25 whereas treatment with cefuroxim (OR: 1.2 [95% CI: 0.8 – 1.8]) or meropenem (OR: 0.9 [95% CI:  
26  
27 0.5 – 1.4]) for three days or more were not predictors of this endpoint. The following modifications  
28  
29 did not alter the signal of this analysis: 1) excluding all patients who died within the first seven  
30  
31 days, 2) excluding all patients with invasive fungal infection on day 1-28, 3) combining the  
32  
33 betalactam exposure with exposure to flour-quinolone exposure (data not shown) or 4) adding  
34  
35 ‘Alert-procalcitonin’ at baseline as a variable.  
36  
37  
38  
39  
40  
41

## 42 Discussion

### 43 Principal findings

44 We observed that the duration of renal failure is prolonged in critically ill patients randomized to  
45  
46 receive high exposure to broad-spectrum antibiotics and escalated diagnostic work-up according to  
47  
48 a biomarker-strategy, compared to patients randomized to receive standard care according to  
49  
50 guidelines regarding use of antibiotics and diagnostics. This difference in renal function was mainly  
51  
52  
53  
54  
55  
56  
57  
58  
59  
60

1  
2  
3 confined to a prolongation of existing renal dysfunction, since there was only a moderate, although  
4  
5 significant, difference in de novo acute renal failure.  
6

7  
8 To our knowledge, this study provides the first substantive evidence to inform this critical issue  
9  
10 within ICU medicine. Firstly, the study was a randomized, good clinical practice controlled trial  
11  
12 with a high sample size for comparison of organ failure, and the patients' baseline characteristics in  
13  
14 general and specifically regarding renal parameters, were comparable. Secondly, the rate of follow-  
15  
16 up, although not complete for the entire period, was high and equal among the groups and the rate  
17  
18 of renal failure on the last day of follow-up in the two groups was comparable. Thus, the observed  
19  
20 increased risk of persistent renal failure in the "high-exposure group" is attributable to this  
21  
22 intervention in some way.  
23

24  
25 The intervention consisted of an increased number of culture samples, a proposed initiative to do  
26  
27 further diagnostic imaging (no observed difference) and a rapid and aggressive antibiotic escalation  
28  
29 with certain drugs, which was documented to be of substantial extent (table 2). As a moderate  
30  
31 increase in microbiologic sampling would not cause renal failure, and since there was no observed  
32  
33 increase in diagnostic imaging, these interventions seems implausible reasons to explain the  
34  
35 observations depicted in table 3.  
36

37  
38 This leaves us with the documented (table 2) escalation in use of piperacillin/tazobactam and  
39  
40 ciprofloxacin as possible explanations. Before concluding, that the observed renal dysfunction was  
41  
42 caused directly by one (or both) of these drugs, we wanted to exclude the possibility that the results  
43  
44 had appeared because of a derived effect of an increase in fungal infections. Fungal infections have  
45  
46 been linked to broad-spectrum antibiotics<sup>16</sup>, and renal failure is a well-known complication to some  
47  
48 antifungals<sup>17</sup>. However, excluding all patients with invasive fungal infections did not alter the  
49  
50 results.  
51

52  
53 Based on these results, and after having excluded other potential explanations, we realized  
54  
55  
56  
57  
58  
59  
60

1  
2  
3 that nephrotoxicity from piperacillin/tazobactam and/or ciprofloxacin was the most plausible  
4 explanation of the observed renal dysfunction. To further substantiate this, several analyses were  
5 conducted. A multiple effects model was built to examine the GFR in the days after administration  
6 of different frequently used drugs. This model included the five most often administered antibiotics,  
7 including piperacillin/tazobactam, meropenem, cefuroxim, ciprofloxacin and vancomycin along  
8 with other known and suspected causes of renal failure. In this model, the use of  
9 piperacillin/tazobactam was associated with a striking low rate of GFR-improvement, compared to  
10 the other drugs investigated. Intriguingly, this adverse effect appears to be reversible, since patients  
11 in whom, piperacillin/tazobactam was discontinued, had the fastest improvement in renal function  
12 as compared with patients on other antibiotic courses. Several sensitivity analyses were performed  
13 with findings consistent with this observation.  
14  
15  
16  
17  
18  
19  
20  
21  
22  
23  
24  
25  
26  
27  
28  
29

### 30 **Comparison with other studies**

31 Although clinical evidence regarding renal failure according to use of piperacillin/tazobactam in  
32 ICU patients has been limited, the influence of piperacillin on renal function has been investigated  
33 in healthy volunteers in laboratory experiments. In a cross-over experiment, the influence on drug  
34 clearance from concurrent administration of piperacillin and flucloxacillin was estimated<sup>18</sup>. The  
35 authors observed that flucloxacillin clearance was reduced to 45% [90% CI: 40 – 50%] when  
36 piperacillin was administered simultaneously, whereas piperacillin clearance was unaffected by  
37 concurrent flucloxacillin administration. Time-clearance slope modeling identified competitive  
38 inhibition of renal tubular secretion as the most likely explanation. Piperacillin-induced reduction of  
39 imipenem clearance<sup>19</sup> and of tazobactam clearance has also been found<sup>20</sup>, and a high correlation  
40 between creatinin clearance and piperacillin clearance has been documented<sup>21</sup>, and thus, it is  
41 plausible that piperacillin specifically causes nephrotoxicity.  
42  
43  
44  
45  
46  
47  
48  
49  
50  
51  
52  
53  
54  
55  
56  
57  
58  
59  
60

1  
2  
3 Additionally, the published randomized trials comparing piperacillin/tazobactam with other beta-  
4 lactam drugs in intensive care unit settings are scarce, underpowered for assessment of renal failure  
5 endpoints and do generally not address renal endpoints<sup>5-7</sup>. Trials from other settings: haematological  
6 patients, diabetes patients, and surgical settings do generally not investigate renal failure endpoints,  
7 and in the few (non-ICU) trials that do report kidney endpoints, the total frequency of these makes  
8 the power to avoid type II error very low (diagram D2, online digital supplement).  
9  
10  
11  
12  
13  
14  
15  
16  
17  
18

### 19 **Strengths and weaknesses of the study**

20 Although our study is performed on analyses from a large randomized good clinical practice  
21 controlled trial with a stringent methodology and a high level of follow-up, there are limitations that  
22 deserve mentioning: First, follow-up for organ-related measures was not complete, although we  
23 followed patients for all blood samples done in 1) the hospital, at which they were initially  
24 recruited, 2) other hospitals in Denmark, where we had electronic access to blood samples.  
25 However, patients who continued to suffer from renal failure when discharged from hospital, were  
26 out of reach for follow-up for their renal function. Of note, the fraction of patients with remaining  
27 renal failure at time of discharge was comparable between the two groups (table 4), and hence it is  
28 unlikely that this lack of ability to ascertain renal outcome contributed to our main findings.  
29 Second, the study was a post hoc analysis using a previously published trial as material. We have  
30 tried to compensate for this by writing a detailed analysis-plan based on the hypotheses, we wanted  
31 to test, before analysis. Third, although the sample size was relatively large compared to most other  
32 randomized trials in this setting, the sample size for these secondary analyses were based on the  
33 assumption of 25% renal failure in the 'standard exposure group' and a relative risk of 1.25 in the  
34 'high exposure group'. The observed numbers were 21% and 1.22 which calls for a slightly higher  
35 sample size. However, the sample size needed to show the differences observed in the multivariable  
36  
37  
38  
39  
40  
41  
42  
43  
44  
45  
46  
47  
48  
49  
50  
51  
52  
53  
54  
55  
56  
57  
58  
59  
60

1  
2  
3 analyses was far smaller, and since these analyses confirmed the main findings, we do not think the  
4  
5 results are due to chance.  
6

7  
8 In this trial, for the first time ever to our knowledge, random allocation to high exposure to broad-  
9  
10 spectrum antibiotics in the intensive care unit has been systematically applied according to a  
11  
12 randomized algorithm and this resulted in prolongation of renal failure. The results were confirmed  
13  
14 when excluding patients with fungal infections, and a multiple effects model revealed a particularly  
15  
16 low renal recovery in patients while piperacillin/tazobactam was administered and a remarkable  
17  
18 recovery when discontinuing this drug; a finding that was specific for this drug. Several other crude  
19  
20 and adjusted models likewise confirmed the findings. Finally, the results from this trial are  
21  
22 supported by human experimental studies.  
23  
24  
25  
26

## 27 **Conclusion**

28  
29 In conclusion, the use of piperacillin/tazobactam caused a delayed renal recovery in critically ill  
30  
31 patients, and renal function improved after discontinuation of the drug. We cannot within the  
32  
33 sample size of this trial establish whether the use of piperacillin/tazobactam in some cases causes  
34  
35 persistent renal failure, and thus, further research to explore this is warranted. We think this impact  
36  
37 on renal function is more likely caused by a toxic effect on the renal tubule than by a lack of effect  
38  
39 towards the infection, since this drug is independently associated with a high chance of survival in  
40  
41 other infected populations<sup>8</sup>, and we must emphasize that our findings are strictly confined to  
42  
43 critically ill patients.  
44  
45  
46  
47  
48

## 49 **Contributors**

50  
51 JUJ designed the study, made the data collection tools, monitored data collection for the whole trial,  
52  
53 wrote the statistical analysis plan, and drafted and the paper. He is guarantor. JUJ, ZF and JK  
54  
55 cleaned and analysed the data. JL, BL, LH, MHB, TM, MHA, KJT, JL, MS, HT, PS-J, AØL, DGS,  
56  
57  
58  
59  
60



1  
2  
3 NR, KT, PCF, KML, NED, MEJ, LR, CØ, ZF, JK and JG made input study design, data collection  
4  
5 tools and analysis plan and on the manuscript. JUJ implemented the trial at the centers. All  
6  
7 members of the Procalcitonin And Survival Study (PASS) Group assisted in designing the trial.  
8  
9 The members of the PASS study group are as follows: Central Coordinating Centre - J.U. Jensen,  
10  
11 B. Lundgren, J. Grarup, M.L. Jakobsen, S. S. Reilev, M. Kofoed-Djursner, J. D. Lundgren;  
12  
13 Regional Coordinating Centres - Hvidovre - J. Løken, M. Steensen; Gentofte - T. Mohr, K.  
14  
15 Thornberg, K. Thormar; Hillerød - L.Hein, M. Bestle; Glostrup - D. Strange, A.Ø. Lauritsen;  
16  
17 Herlev - H. Tousi, P. Søre-Jensen; Roskilde - N. Reiter, N.E. Drenck; Skejby - M.H. Andersen, P.  
18  
19 Fjeldborg; Århus - K.M. Larsen; Data Management & Statistical Centre - Z. Fox, J. Kjær, D.  
20  
21 Kristensen; Procalcitonin Analysis & Logistics Centre - J.U.Jensen, B. Lundgren, M. B.  
22  
23 Rasmussen, C. S.v.Hallas, M. Zacho, J. Iversen, T. Leerbeck, M. Jeppesen, K.S. Hansen, K.B.  
24  
25 Jensen; Data and Safety Monitoring Board - H. Masur (Chair), J. Chastre, H. Schönheyder, C.  
26  
27 Pedersen; Clinical Microbiology Management – B. Lundgren, J. D. Knudsen, A. Friis-Møller, K.  
28  
29 Schønning, A. Lester, H. Westh, G. Lisby, J.K. Møller, B. Bruun, J.J. Christensen, C. Østergaard,  
30  
31 M. Arpi, K. Astvad, M.D. Bartels, J. Engberg, H. Fjeldsøe-Nielsen, U.S. Jensen; PASS Site Clinical  
32  
33 Investigators (numbers of recruited persons are in parentheses) - Glostrup (290) – L. Hein, T.  
34  
35 Mohr, D. G. Strange, P. L. Petersen, A. Ø. Lauritsen, S. Hougaard, T. Mantoni, L. Nebrich, A.  
36  
37 Bendtsen, L.H. Andersen, F. Bærentzen, Andreas Eversbusch, B. Bømler, R. Martusevicius, T.  
38  
39 Nielsen. P.M. Bådstøløkken, C. Maschmann, U. Grevstad, P. Hallas, A. Lindhardt, T. Galle, K.  
40  
41 Graeser, E. Hohwu-Christensen, P. Gregersen, H.C. Boesen, L.M. Pedersen, K. Thiesen, L.C.  
42  
43 Hallengreen, I. Rye, J. Cordtz, K.R. Madsen, P.R.C. Kirkegaard, L. Findsen, L.H. Nielsen, D.H.  
44  
45 Pedersen, J.H. Andersen, C. Albrechtsen, A. Jacobsen, T. Jansen, A.G. Jensen, H.H. Jørgensen, M.  
46  
47 Vazin; Gentofte (209) – L. Lipsius, K. Thornberg, J. Nielsen, K. Thormar, M. Skielboe, B. Thage,  
48  
49 C. Thoft, M. Uldbjerg, E. Anderlo, M. Engsig, F. Hani, R.B. Jacobsen. L. Mulla, U. Skram; Herlev  
50  
51 (154) – H. Tousi, P. Søre-Jensen, T. Waldau, T. Faber, B. Andersen, I. Gillesberg, A. Christensen,  
52  
53  
54  
55  
56  
57  
58  
59  
60

1  
2  
3 C. Hartmann, R. Albret, D.S. Dinesen, K. Gani, M. Ibsen; Hvidovre (148) – J. Løken, M. Steensen,  
4  
5 J.A. Petersen, P. Carl, E. Gade, D. Solevad, C. Heiring, M. Jørgensen, K. Ekelund, A. Afshari, N.  
6  
7 Hammer, M. Bitsch, J.S. Hansen, C. Wamberg, T.D. Clausen, R. Winkel, J. Huusom, D.L. Buck, U.  
8  
9 Grevstad, E. Aasvang, K. Lenz, P. Mellado, H. Karacan, J. Hidestål, J. Høgagard, J. Højbjerg, J.  
10  
11 Højlund, M. Johansen, S. Strande; Hillerød (138) – M. Bestle, S. Hestad, M. Østergaard, N.  
12  
13 Wesche, S.A. Nielsen, H. Christensen, H. Blom, C.H. Jensen K. Nielsen, N.G. Holler, K.A.  
14  
15 Jeppesen; Århus-Skejby (94) – M.H. Andersen, P. Fjeldborg, A. Vestergaard, O. Viborg, C.D.  
16  
17 Rossau; Roskilde (90) – N. Reiter, M. Glæemose, M.B.Wranér, C.B. Thomsen, B. Rasmussen, C.  
18  
19 Lund-Rasmussen, B. Bech, K. Bjerregaard, L. Spliid, L.L.W. Nielsen, N.E. Drenck; Århus-Centre  
20  
21 (63) – K.M. Larsen, M. Goldinger, D. Illum, C. Jessen, A. Christiansen, A. Berg, T. Elkmann,  
22  
23 J.A.K. Pedersen, M. Simonsen; Bispebjerg (14) H. Joensen, H. Alstrøm, C. Svane, A. Engquist.  
24  
25 Supported by grants from the Danish Research Council, The Lundbeck Foundation, Research  
26  
27 Foundation for the Capital Region of Denmark, The Toyota Foundation, Brahms diagnostica (un-  
28  
29 restricted grant), The Harboe Foundation, The A.P. Møller Foundation and the Idella Foundation.  
30  
31  
32 None of these had any influence on the design or conduct of the study; collection, management,  
33  
34 analysis, and interpretation of the data; nor the preparation, or approval of the manuscript. All  
35  
36 authors had full access to all of the data in the study and conjointly take responsibility for the  
37  
38 integrity of the data and the accuracy of the data analysis.  
39  
40  
41  
42

### 43 **Funding**

44  
45 Supported by grants from the Danish Research Council, The Lundbeck Foundation, Research  
46  
47 Foundation for the Capital Region of Denmark, The Toyota Foundation, Brahms diagnostica (un-  
48  
49 restricted grant), The Harboe Foundation, The A.P. Møller Foundation and the Idella Foundation.  
50  
51  
52 None of these had any influence on the design or conduct of the study; collection, management,  
53  
54 analysis, and interpretation of the data; nor the preparation, or approval of the manuscript.  
55

### 56 **Competing interests**

1  
2  
3 All authors have completed the Unified Competing Interest form at  
4  
5 [www.icmje.org/coi\\_disclosure.pdf](http://www.icmje.org/coi_disclosure.pdf) (available on request from the corresponding author) and declare  
6  
7 that the trial was funded mainly by the Danish State (Danish Research Council) and : all authors  
8  
9 state that they have no relationships with companies that might have an interest in the submitted  
10  
11 work in the previous 3 years; their spouses, partners, or children have no financial relationships that  
12  
13 may be relevant to the submitted work; and all authors have no non-financial interests that may be  
14  
15 relevant to the submitted work.  
16  
17

### 18 **Ethical approval**

19  
20 The study was approved by the ethics committee for Copenhagen and Frederiksberg community  
21  
22 (now Ethics Committee for the Capitol Region): H-KF-01-272-753. Patient consent: We received  
23  
24 written consent from the patient or the next of kin for trial inclusion.  
25  
26

### 27 **Data sharing**

28  
29 No additional data available.  
30  
31  
32  
33

### 34 **References**

- 35  
36  
37 1. Levy MM, Macias WL, Vincent JL, et al. Early changes in organ function predict eventual  
38 survival in severe sepsis. *Crit Care Med.* 2005; **33**(10): 2194-201.  
39 2. Jia X, Malhotra A, Saeed M, et al. Risk factors for ARDS in patients receiving mechanical  
40 ventilation for > 48 h. *Chest.* 2008; **133**(4): 853-61.  
41 3. Rubenfeld GD, Caldwell E, Peabody E et al. Incidence and outcomes of acute lung injury. *N*  
42 *Engl J Med.* 2005; **353**(16): 1685-93.  
43 4. Kane-Gill SL, Jacobi J, Rothschild JM. Adverse drug events in intensive care units: risk  
44 factors, impact, and the role of team care. *Crit Care Med.* 2010; **38**(6 Suppl): S83-9.  
45 5. Brun-Buisson C, Sollet JP, Schweich H et al. Treatment of ventilator-associated pneumonia  
46 with piperacillin-tazobactam/amikacin versus ceftazidime/amikacin: a multicenter, randomized  
47 controlled trial. VAP Study Group. *Clin Infect Dis.* 1998; **26**(2): 346-54.  
48 6. Alvarez-Lerma F, Insausti-Ordenana J, Jorda-Marcos R, et al. Efficacy and tolerability of  
49 piperacillin/tazobactam versus ceftazidime in association with amikacin for treating nosocomial  
50 pneumonia in intensive care patients: a prospective randomized multicenter trial. *Intensive Care*  
51 *Med.* 2001; **27**(3): 493-502.  
52 7. Marra F, Reynolds R, Stiver G, et al. Piperacillin/tazobactam versus imipenem: a double-  
53 blind, randomized formulary feasibility study at a major teaching hospital. *Diagn Microbiol Infect*  
54 *Dis.* 1998; **31**(2): 355-68.  
55  
56  
57  
58  
59  
60

- 1
- 2
- 3 8. Paul M, Yahav D, Bivas A, et al. Anti-pseudomonal beta-lactams for the initial, empirical,
- 4 treatment of febrile neutropenia: comparison of beta-lactams. *Cochrane Database Syst Rev.* 2010;
- 5 **11**: CD005197.
- 6
- 7 9. Reich G, Cornely OA, Sandherr M, et al. Empirical antimicrobial monotherapy in patients
- 8 after high-dose chemotherapy and autologous stem cell transplantation: a randomised, multicentre
- 9 trial. *Br J Haematol.* 2005; **130**(2): 265-70.
- 10
- 11 10. Gomez L, Estrada C, Gomez I, et al. Low-dose beta-lactam plus amikacin in febrile
- 12 neutropenia: cefepime vs. piperacillin/tazobactam, a randomized trial. *Eur J Clin Microbiol Infect*
- 13 *Dis.* 2010; **29**(4): 417-27.
- 14
- 15 11. Sato T, Kobayashi R, Yasuda K, et al. A prospective, randomized study comparing
- 16 ceftazidime with piperacillin-tazobactam plus ceftazidime as empirical therapy for febrile
- 17 neutropenia in children with hematological disorders. *Pediatr Blood Cancer.* 2008; **51**(6): 774-7.
- 18
- 19 12. Bow EJ, Rotstein C, Noskin GA, et al. A randomized, open-label, multicenter comparative
- 20 study of the efficacy and safety of piperacillin-tazobactam and cefepime for the empirical treatment
- 21 of febrile neutropenic episodes in patients with hematologic malignancies. *Clin Infect Dis.* 2006;
- 22 **43**(4): 447-59.
- 23
- 24 13. Jensen JU, Hein L, Lundgren B, et al. Procalcitonin-guided interventions against infections
- 25 to increase early appropriate antibiotics and improve survival in the intensive care unit: A
- 26 randomized trial. *Crit Care Med.* 2011.
- 27
- 28 14. Dellinger RP, Levy MM, Carlet JM, et al. Surviving Sepsis Campaign: international
- 29 guidelines for management of severe sepsis and septic shock: 2008. *Crit Care Med.* 2008; **36**(1):
- 30 296-327.
- 31
- 32 15. Levy MM, Fink MP, Marshall JC, et al. 2001 SCCM/ESICM/ACCP/ATS/SIS International
- 33 Sepsis Definitions Conference. *Crit Care Med.* 2003; **31**(4): 1250-6.
- 34
- 35 16. Hebert C, Villaran R, Tolentino J, et al. Prior antimicrobial exposure and the risk for
- 36 bloodstream infection with fluconazole-non-susceptible *Candida* strains. *Scand J Infect Dis.* 2010;
- 37 **42**(6-7): 506-9.
- 38
- 39 17. Sorkine P, Nagar H, Weinbroum A, et al. Administration of amphotericin B in lipid
- 40 emulsion decreases nephrotoxicity: results of a prospective, randomized, controlled study in
- 41 critically ill patients. *Crit Care Med.* 1996; **24**(8): 1311-5.
- 42
- 43 18. Landersdorfer CB, Kirkpatrick CM, Kinzig M, et al. Inhibition of flucloxacillin tubular renal
- 44 secretion by piperacillin. *Br J Clin Pharmacol.* 2008; **66**(5): 648-59.
- 45
- 46 19. Saitoh H, Oda M, Gytoku T, et al. A beneficial interaction between imipenem and
- 47 piperacillin possibly through their renal excretory process. *Biol Pharm Bull.* 2006; **29**(12): 2519-22.
- 48
- 49 20. Komuro M, Maeda T, Kakuo H, et al. Inhibition of the renal excretion of tazobactam by
- 50 piperacillin. *J Antimicrob Chemother.* 1994; **34**(4): 555-64.
- 51
- 52 21. Aronoff GR, Sloan RS, Brier ME, et al. The effect of piperacillin dose on elimination
- 53 kinetics in renal impairment. *Eur J Clin Pharmacol.* 1983; **24**(4): 543-7.
- 54
- 55
- 56
- 57
- 58
- 59
- 60

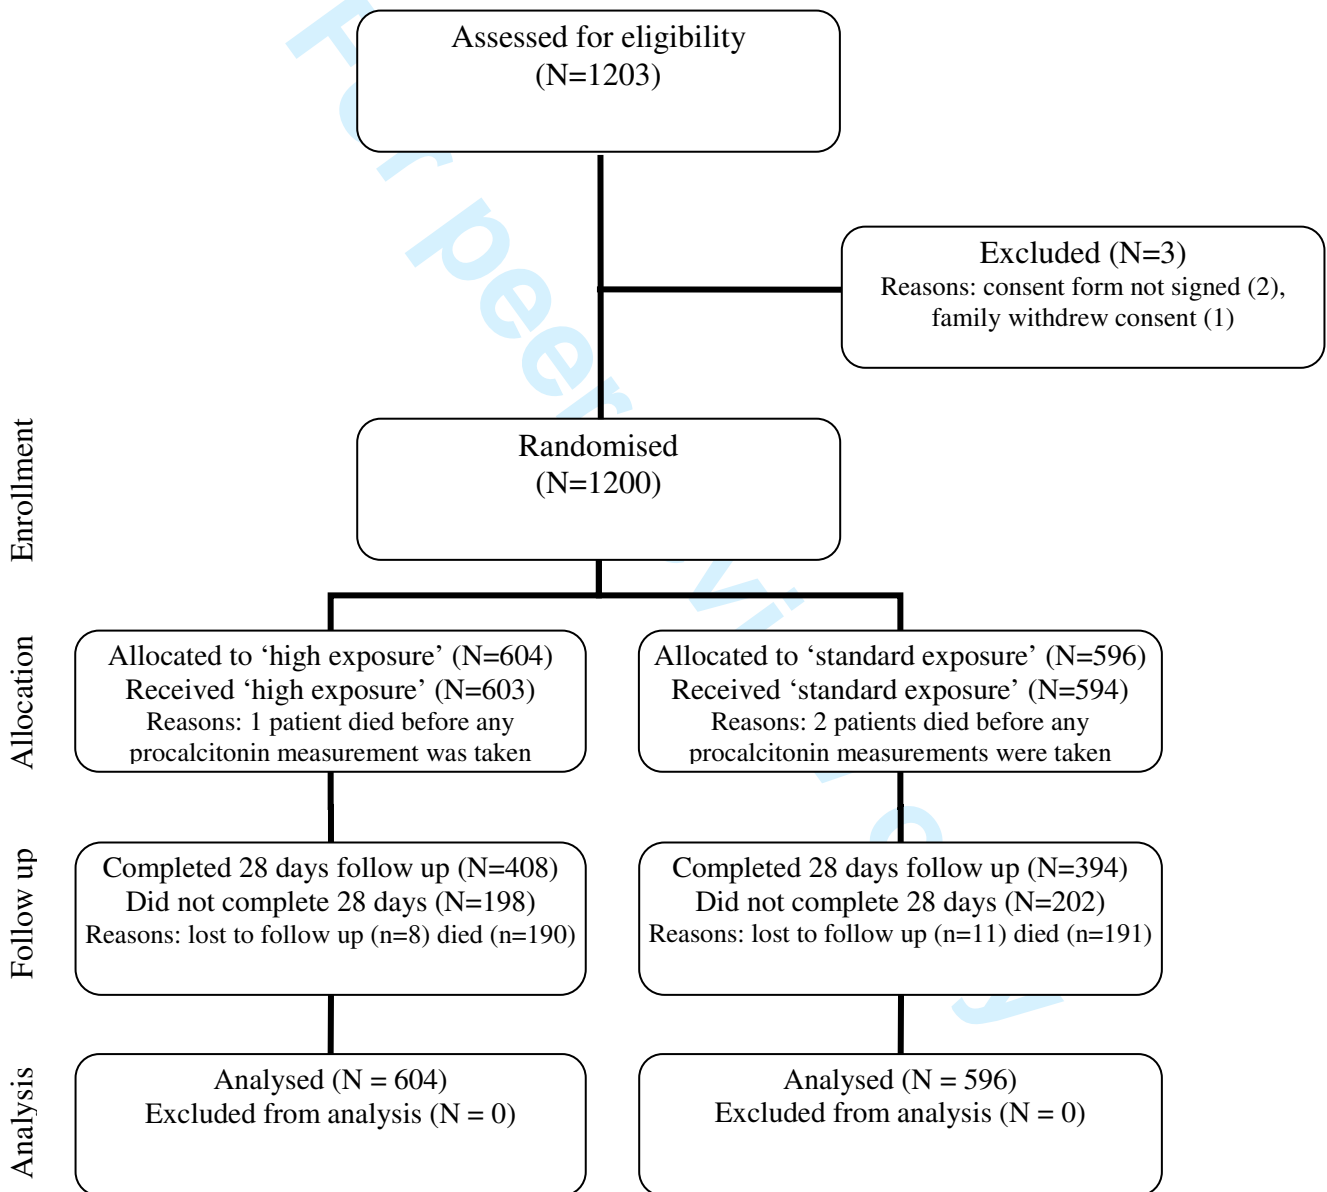

Figure 1. Patient Flow Diagram of the trial

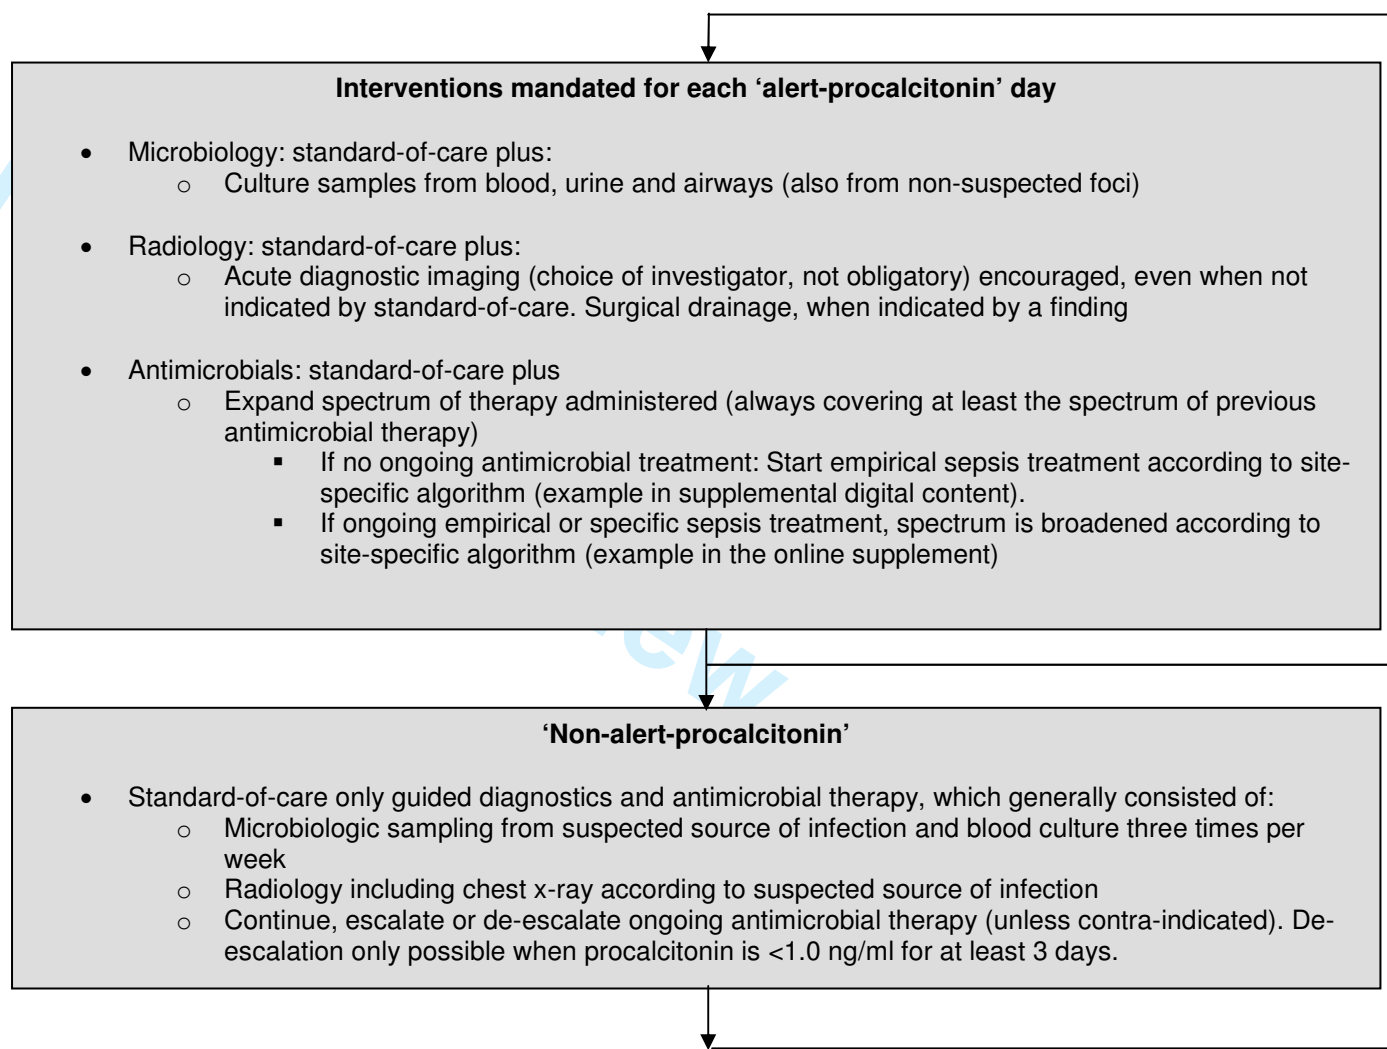

1  
2  
3  
4  
5  
6  
7  
8  
9  
10  
11  
12  
13  
14  
15  
16  
17  
18  
19  
20  
21  
22  
23  
24  
25  
26  
27  
28  
29  
30  
31  
32  
33  
34  
35  
36  
37  
38  
39  
40  
41  
42  
43  
44  
45  
46  
47  
48  
49  
50  
51  
52  
53  
54  
55  
56  
57  
58  
59  
60

Figure 2. General principles of procalcitonin-guided intervention.

At 'alert-procalcitonin' situation ( $\geq 1.0$  ng/ml and not decreasing by at least 10% from the previous day), interventions were obligatorily conducted according to an algorithm with specific instructions for intervention, which was adapted to the antimicrobial guidelines on the site. Antimicrobials were daily adjusted according to 1) present and previous procalcitonin values, 2) infectious state of the patient (clinical presentation, microbiology, radiology etc.) and 3) history of antimicrobial use. Procalcitonin-guided antimicrobial escalation was mandatory, except when 1) there was a clear contra-indication for administering it or 2) microbiology "explaining the infectious presentation of the patient" was announced (same date) leading to specific therapy. Standard-of-Care antimicrobial diagnostics and treatment was not waived in the 'high exposure arm (nor the 'standard exposure' arm) to assure patient safety. According to the standard-of-care principle, all patients with septic shock were treated at the onset of hypotension with antimicrobials covering >95% of the causes of this condition in our hospitals. Awaiting procalcitonin results/low procalcitonin levels was not considered a plausible reason to withhold antimicrobial treatment. The treating physician was reminded daily via phone from the coordinating centre at each 'alert-procalcitonin' to intervene. In the 'standard exposure' arm, procalcitonin measurements were not available.

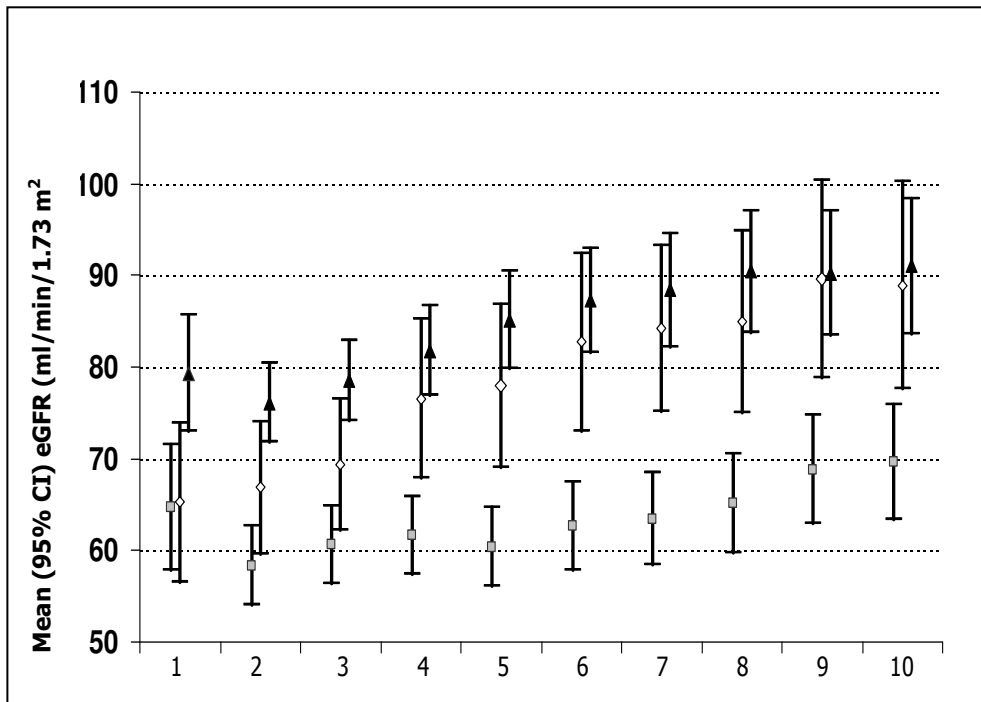

Figure 3. eGFR during ten days on cefuroxim, piperacillin/tazobactam and meropenem. ▲=cefuroxim; ■=piperacillin/tazobactam; ◇=meropenem.



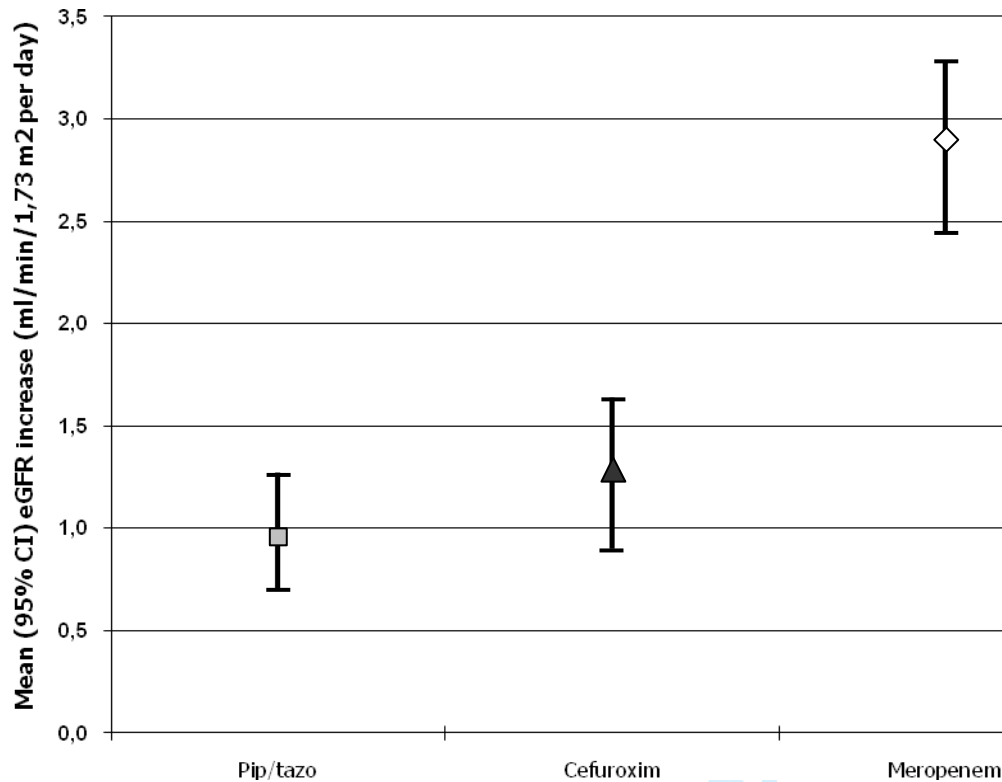

Figure 4. eGFR increase estimated per day use of antibiotics. Estimates were made for every antibiotic in mixed effect models, and all eGFR estimates were adjusted for: treatment arm ('low exposure' vs. 'high exposure'), gender, age ( $\geq 65$  vs.  $< 65$  years), APACHE II score ( $\geq 20$  vs.  $< 20$ ), Clinically judged infection (severe sepsis/septic shock vs. milder or no infection), patient category (surgical vs. medical) and eGFR level at administration of the antibiotic, ( 1:  $< 30$  ml/min/1,73 m<sup>2</sup>, 2: 31-60 ml/min/1,73 m<sup>2</sup>, 3:  $> 60$  ml/min/1,73 m<sup>2</sup>). Pip/tazo=piperacillin/tazobactam).

## Diagram D1

## Example of the site-specific interventional algorithm, site 'Aarhus'

## The Procalcitonin And Survival Study (PASS) Intervention Algorithm, Site: Aarhus

IMPORTANT: All patients shall (at least) receive antimicrobial therapy covering "standard-of-care", i.e. if any existing guidelines or evidence for antimicrobial treatment indicate/ contra-indicate surgical and/or antibiotic treatment, then the patient should be treated according to this. Indicated treatment should never be left out because of a possibly low procalcitonin (PCT).

All (except for the above standing situations) patients in the "PCT intervention" group must have treatment according to the present guidelines, including interventions when procalcitonin is  $\geq 1,0$  ng/ml and "Alert"<sup>a</sup>.

Patients are categorized daily according to the PASS intervention categories, on the basis on the present and the previous PCT measurement (displayed as "Alert" or "Non-Alert" in the website). In correspondence with every category, a PASS-intervention is displayed below. The treatment is, adjusted according to new and relevant microbiology that "explains" the clinical picture

|                   |                                                                                                                                                                                                                                                        |
|-------------------|--------------------------------------------------------------------------------------------------------------------------------------------------------------------------------------------------------------------------------------------------------|
| <b>CATEGORY 1</b> | First PCT > 1,0 ng/ml, patient has not received antibiotics ( $\geq 1$ DDD <sup>b</sup> within 72 h)                                                                                                                                                   |
| <b>CATEGORY 2</b> | A) First PCT $\geq 1,0$ ng/ml, patient has received antibiotics ( $\geq$ DDD <sup>b</sup> within 72 h)<br>or<br>B) PCT "Alert" for 1 day after CAT 1, CAT 4 or CAT 5 has been started<br>or<br>C) PCT "Alert"*** from "start-sample" till next morning |
| <b>CATEGORY 3</b> | A) First PCT $\geq 1,0$ ng/ml, patient has received antibiotics ( $\geq$ DDD <sup>b</sup> within 72 h) and clinical suspicion of fungal infection or catheter related infection.<br>or<br>B) PCT "Alert" for 1 day after CAT 2 has been started        |
| <b>CATEGORY 4</b> | A) Start PCT < 1,0 ng/ml<br>or<br>B) "Non-Alert" PCT, but $\geq 1,0$ ng/ml.<br>or<br>C) PCT < 1,0 for 1-2 days                                                                                                                                         |
| <b>CATEGORY 5</b> | PCT < 1,0 ng/ml for 3 or more days.                                                                                                                                                                                                                    |

| Action            | Diagnostics                                                                                                                                                                                                                                                   | Surgery                                               | Antimicrobials <sup>c</sup>                                                                                                                                                                                                                                                                          |
|-------------------|---------------------------------------------------------------------------------------------------------------------------------------------------------------------------------------------------------------------------------------------------------------|-------------------------------------------------------|------------------------------------------------------------------------------------------------------------------------------------------------------------------------------------------------------------------------------------------------------------------------------------------------------|
| <b>CATEGORY 1</b> | <ul style="list-style-type: none"> <li>Blood culture</li> <li>Tracheal secretion</li> <li>Urine culture</li> <li>Culture from susp. source</li> <li>Diagnostic imaging of susp. source</li> </ul>                                                             | According to diagnostic imaging and clinical judgment | <ol style="list-style-type: none"> <li>Cefuroxim 1500 mg x 3 i.v. or Ampicillin 1g x 4 / 2 g x 3 i.v.</li> <li>Ciprofloxacin 400 mg x 2 i.v.</li> <li>Consider: Metronidazol 500 mg x 2 i.v.</li> </ol>                                                                                              |
| <b>CATEGORY 2</b> | <ul style="list-style-type: none"> <li>Blood culture</li> <li>Tracheal secretion</li> <li>Urine culture</li> <li>Culture from susp. source</li> <li>Diagnostic imaging of susp. source</li> </ul>                                                             | According to diagnostic imaging and clinical judgment | <ol style="list-style-type: none"> <li>Pip/Tazo<sup>d</sup> 4gx3 iv or Meropenem 1gx3 iv</li> <li>Ciprofloxacin 400 mg x 2 i.v.</li> <li>Metronidazol 500 mg x 2 i.v.</li> <li>Consider fungal infection: Fluconazole i.v. and cath. inf: Vancomycin, dosage acc.to. Se-Vanco<sup>e</sup></li> </ol> |
| <b>CATEGORY 3</b> | <ul style="list-style-type: none"> <li>Blood culture</li> <li>Tracheal secretion</li> <li>Urine culture</li> <li>Culture from susp. source</li> <li>Diagnostic imaging of susp. source</li> <li>Renewing oldest diagnostic imaging of susp. source</li> </ul> | According to diagnostic imaging and clinical judgment | <ol style="list-style-type: none"> <li>Pip/Tazo<sup>d</sup> 4gx3 iv or Meropenem 1gx3 iv</li> <li>Ciprofloxacin 400 mg x 2 i.v.</li> <li>Metronidazol 500 mg x 2 i.v.</li> <li>Fluconazol 400 mg x 2 i.v.</li> <li>Vancomycin, dosage acc.to. Se-Vanco<sup>e</sup></li> </ol>                        |
| <b>CATEGORY 4</b> | Nothing further                                                                                                                                                                                                                                               | Standard-of-care approach                             | Continue present treatment                                                                                                                                                                                                                                                                           |
| <b>CATEGORY 5</b> | Nothing further                                                                                                                                                                                                                                               | Standard-of-care approach                             | Re-consider the indication for antibiotics (standard-of-care principle)                                                                                                                                                                                                                              |

<sup>a</sup> 'Alert PCT' is defined as PCT-day1  $\geq$  PCT day 0 x 0.9. So a decrease in PCT from 11,2 ng/ ml to 10,5 ng/ ml is an "irrelevant decrease" and is defined as an "Alert" PCT. <sup>b</sup> DDD = Defined Daily Dosages). N.B.: The mentioned dosages are examples. Dosing regimen and frequency is prescribed according to the department guidelines (according to weight, kidney function, haemodialysis, Continuous dialysis etc.). <sup>c</sup> Antimicrobial spectrum covered can be broader than suggested (discretion of investigator). Administration of antimicrobials with a narrower spectrum on Alert-PCT days, should only take place when any antimicrobial treatment covering the suggested spectrum is contra-indicated and such a therapy should always be discussed and accepted by the coordinating centre. <sup>d</sup> Pip/Tazo: piperacillin/tazobactam. <sup>e</sup> Se-Vanco: serum-vancomycin measurements

**Diagram D2:****Meta-analysis of randomized trials using piperacillin-containing regimens exploring renal failure**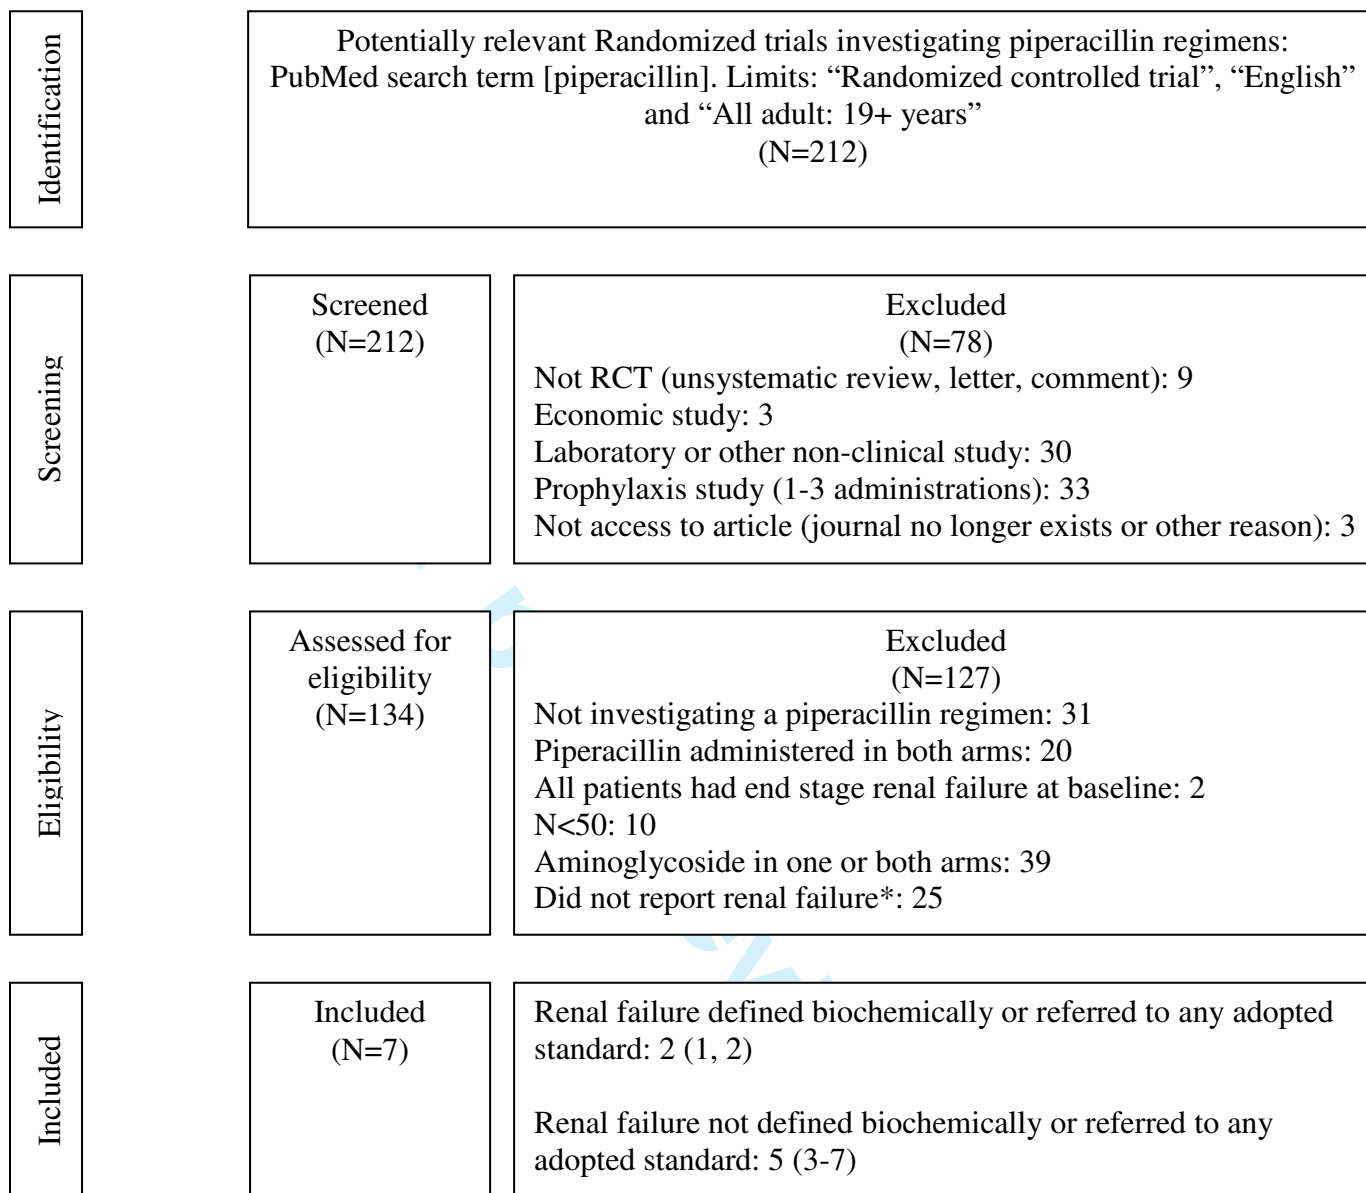**Results:**

- In the initial identification phase, four ICU studies were found: They were excluded, since A) only a (non-defined) part of the patients received piperacillin(8), B) Both groups received piperacillin(9), C) one or both groups received aminoglycosides concomitantly(10, 11) .
- In the 7 (non-ICU) trials eventually included, 1592 episodes of therapy were observed.
- 21 cases of renal failure (not defined) occurred, corresponding to 1.3%.
- Hypothesizing, that the incidence of renal failure is 0.5% in non-piperacillin containing beta-lactam therapies, and aiming to find a risk increase to totally 1.5% (relative risk of 3.0), using conventional type I risk limit of 5% and a power of 80%, the sample size for such a trial investigating this should be approx. 3300 patients (non-ICU setting).
- In an ICU setting, the incidence of renal failure is often >20%. A trial of 1000 patients would be able to detect a risk increase to 28% (Relative risk:1.4) from e.g. piperacillin

\*All articles were reviewed for this. Additionally, in adobe documents with the search option (those not scanned), a search was made in each pdf document with search terms: “renal”, “kidney”, “nephro”, “creatinine” and “gfr”. More than the noted 25 of the articles did not report renal failure, however, if they fulfilled one or more of the other exclusion criteria, they were excluded because of this.

## References (for meta-analysis)

1. Anaissie EJ, Fainstein V, Bodey GP, et al. Randomized trial of beta-lactam regimens in febrile neutropenic cancer patients. *Am J Med.* 1988; 84: 581-9.
2. Winston DJ, Ho WG, Bruckner DA, et al. Beta-lactam antibiotic therapy in febrile granulocytopenic patients. A randomized trial comparing cefoperazone plus piperacillin, ceftazidime plus piperacillin, and imipenem alone. *Ann Intern Med.* 1991; 115: 849-59.
3. Schmitt DV, Leitner E, Welte T, et al. Piperacillin/tazobactam vs imipenem/cilastatin in the treatment of nosocomial pneumonia--a double blind prospective multicentre study. *Infection.* 2006; 34: 127-34.
4. Dela Pena AS, Asperger W, Kockerling F, et al. Efficacy and safety of ertapenem versus piperacillin-tazobactam for the treatment of intra-abdominal infections requiring surgical intervention. *J Gastrointest Surg.* 2006; 10: 567-74.
5. Philpott-Howard J, Burroughs A, Fisher N, et al. Piperacillin-tazobactam versus ciprofloxacin plus amoxicillin in the treatment of infective episodes after liver transplantation. *J Antimicrob Chemother.* 2003; 52: 993-1000.
6. Marra F, Reynolds R, Stiver G, et al. Piperacillin/tazobactam versus imipenem: a double-blind, randomized formulary feasibility study at a major teaching hospital. *Diagn Microbiol Infect Dis.* 1998; 31: 355-68.
7. Bohme A, Just-Nubling G, Bergmann L, et al. A randomized study of imipenem compared to cefotaxime plus piperacillin as initial therapy of infections in granulocytopenic patients. *Infection.* 1995; 23: 349-55.
8. Combes A, Luyt CE, Fagon JY, et al. Impact of piperacillin resistance on the outcome of Pseudomonas ventilator-associated pneumonia. *Intensive Care Med.* 2006; 32: 1970-8.
9. Rafati MR, Rouini MR, Mojtahedzadeh M, et al. Clinical efficacy of continuous infusion of piperacillin compared with intermittent dosing in septic critically ill patients. *Int J Antimicrob Agents.* 2006; 28: 122-7.
10. Alvarez-Lerma F, Insausti-Ordenana J, Jorda-Marcos R, et al. Efficacy and tolerability of piperacillin/tazobactam versus ceftazidime in association with amikacin for treating nosocomial pneumonia in intensive care patients: a prospective randomized multicenter trial. *Intensive Care Med.* 2001; 27: 493-502.
11. Brun-Buisson C, Sollet JP, Schweich H, et al. Treatment of ventilator-associated pneumonia with piperacillin-tazobactam/amikacin versus ceftazidime/amikacin: a multicenter, randomized controlled trial. VAP Study Group. *Clin Infect Dis.* 1998; 26: 346-54.

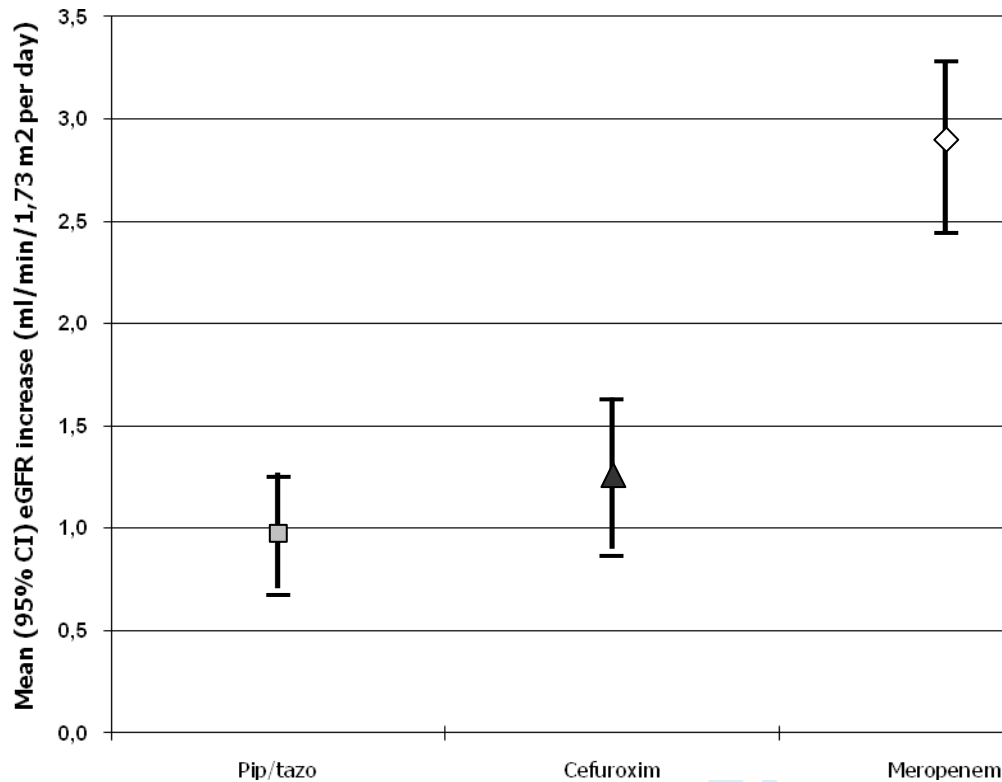

Figure 5. eGFR increase estimated per day use of antibiotics. Estimates were made for every antibiotic in mixed effect models, and all eGFR estimates were adjusted for: treatment arm ('low exposure' vs. 'high exposure'), gender, age ( $\geq 65$  vs.  $< 65$  years), APACHE II score ( $\geq 20$  vs.  $< 20$ ), Clinically judged infection (severe sepsis/septic shock vs. milder or no infection), patient category (surgical vs. medical) and eGFR level at administration of the antibiotic, ( 1:  $< 30$  ml/min/1,73 m<sup>2</sup>, 2: 31-60 ml/min/1,73 m<sup>2</sup>, 3:  $> 60$  ml/min/1,73 m<sup>2</sup>). Pip/tazo=piperacillin/tazobactam).

CONSORT 2010 checklist of information to include when reporting a randomised trial\*

| Section/Topic             | Item No | Checklist item                                                                                                                            | Reported on page No     |
|---------------------------|---------|-------------------------------------------------------------------------------------------------------------------------------------------|-------------------------|
| <b>Title and abstract</b> |         |                                                                                                                                           |                         |
|                           | 1a      | Identification as a randomised trial in the title                                                                                         | 1                       |
|                           | 1b      | Structured summary of trial design, methods, results, and conclusions (for specific guidance see CONSORT for abstracts <sup>21 31</sup> ) | 3                       |
| <b>Introduction</b>       |         |                                                                                                                                           |                         |
| Background and objectives | 2a      | Scientific background and explanation of rationale                                                                                        | 4                       |
|                           | 2b      | Specific objectives or hypotheses                                                                                                         | 4                       |
| <b>Methods</b>            |         |                                                                                                                                           |                         |
| Trial design              | 3a      | Description of trial design (such as parallel, factorial) including allocation ratio                                                      | 5                       |
|                           | 3b      | Important changes to methods after trial commencement (such as eligibility criteria), with reasons                                        | -                       |
| Participants              | 4a      | Eligibility criteria for participants                                                                                                     | 5                       |
|                           | 4b      | Settings and locations where the data were collected                                                                                      | 1,5,15                  |
| Interventions             | 5       | The interventions for each group with sufficient details to allow replication, including how and when they were actually administered     | 6 + fig. 2 + Diagram D1 |
| Outcomes                  | 6a      | Completely defined pre-specified primary and secondary outcome measures, including how and when they were assessed                        | 6-7                     |
|                           | 6b      | Any changes to trial outcomes after the trial commenced, with reasons                                                                     | -                       |
| Sample size               | 7a      | How sample size was determined                                                                                                            | 7-8                     |
|                           | 7b      | When applicable, explanation of any interim analyses and stopping guidelines                                                              | -                       |
| <b>Randomisation:</b>     |         |                                                                                                                                           |                         |
| Sequence generation       | 8a      | Method used to generate the random allocation sequence                                                                                    | 5                       |
|                           | 8b      | Type of randomisation; details of any restriction (such as blocking and block size)                                                       | 5                       |

| Section/Topic                                        | Item No | Checklist item                                                                                                                                                                              | Reported on page No        |
|------------------------------------------------------|---------|---------------------------------------------------------------------------------------------------------------------------------------------------------------------------------------------|----------------------------|
| Allocation concealment mechanism                     | 9       | Mechanism used to implement the random allocation sequence (such as sequentially numbered containers), describing any steps taken to conceal the sequence until interventions were assigned | 5                          |
| Implementation                                       | 10      | Who generated the random allocation sequence, who enrolled participants, and who assigned participants to interventions                                                                     | 6                          |
| Blinding                                             | 11a     | If done, who was blinded after assignment to interventions (for example, participants, care providers, those assessing outcomes) and how                                                    | 6                          |
|                                                      | 11b     | If relevant, description of the similarity of interventions                                                                                                                                 | 6                          |
| Statistical methods                                  | 12a     | Statistical methods used to compare groups for primary and secondary outcomes                                                                                                               | 6-7                        |
|                                                      | 12b     | Methods for additional analyses, such as subgroup analyses and adjusted analyses                                                                                                            | 6-7                        |
| <b>Results</b>                                       |         |                                                                                                                                                                                             |                            |
| Participant flow (a diagram is strongly recommended) | 13a     | For each group, the numbers of participants who were randomly assigned, received intended treatment, and were analysed for the primary outcome                                              | Figure 1 (CONSORT diagram) |
|                                                      | 13b     | For each group, losses and exclusions after randomisation, together with reasons                                                                                                            | Figure 1 (CONSORT diagram) |
| Recruitment                                          | 14a     | Dates defining the periods of recruitment and follow-up                                                                                                                                     | 8                          |
|                                                      | 14b     | Why the trial ended or was stopped                                                                                                                                                          | 8                          |
| Baseline data                                        | 15      | A table showing baseline demographic and clinical characteristics for each group                                                                                                            | Table 1                    |
| Numbers analysed                                     | 16      | For each group, number of participants (denominator) included in each analysis and whether the analysis was by original assigned groups                                                     | 8-9, table 3 +table 4      |
| Outcomes and estimation                              | 17a     | For each primary and secondary outcome, results for each group, and the estimated effect                                                                                                    |                            |



| Section/Topic            | Item No | Checklist item                                                                                                                            | Reported on page No             |
|--------------------------|---------|-------------------------------------------------------------------------------------------------------------------------------------------|---------------------------------|
|                          |         | size and its precision (such as 95% confidence interval)                                                                                  | 9-10 + table 2, 3, 4 + fig. 3+4 |
|                          | 17b     | For binary outcomes, presentation of both absolute and relative effect sizes is recommended                                               | Abstract + p.                   |
| Ancillary analyses       | 18      | Results of any other analyses performed, including subgroup analyses and adjusted analyses, distinguishing pre-specified from exploratory | Table 3, fig. 3+4, p 10.        |
| Harms                    | 19      | All important harms or unintended effects in each group (for specific guidance see CONSORT for harms <sup>28</sup> )                      | Table 3+4, p. 10-11, fig. 3+4   |
| <b>Discussion</b>        |         |                                                                                                                                           |                                 |
| Limitations              | 20      | Trial limitations, addressing sources of potential bias, imprecision, and, if relevant, multiplicity of analyses                          | 13                              |
| Generalisability         | 21      | Generalisability (external validity, applicability) of the trial findings                                                                 | 13                              |
| Interpretation           | 22      | Interpretation consistent with results, balancing benefits and harms, and considering other relevant evidence                             | 10-14                           |
| <b>Other information</b> |         |                                                                                                                                           |                                 |
| Registration             | 23      | Registration number and name of trial registry                                                                                            | 4-5                             |
| Protocol                 | 24      | Where the full trial protocol can be accessed, if available                                                                               | 5                               |
| Funding                  | 25      | Sources of funding and other support (such as supply of drugs), role of funders                                                           | 16                              |

\*We strongly recommend reading this statement in conjunction with the CONSORT 2010 Explanation and Elaboration<sup>13</sup> for important clarifications on all the items. If relevant, we also recommend reading CONSORT extensions for cluster randomised trials,<sup>11</sup> non-inferiority and equivalence trials,<sup>12</sup> non-pharmacological treatments,<sup>32</sup> herbal interventions,<sup>33</sup> and pragmatic trials.<sup>34</sup> Additional extensions are forthcoming: for those and for up to date references relevant to this checklist, see [www.consort-statement.org](http://www.consort-statement.org).



**PASS-II**

25<sup>th</sup> Aug 2010

**Antibiotics and Renal Organ Failure – secondary endpoints from the Procalcitonin And Survival Study - analysis plan**

**1. Consort Flow Diagram (done in PASS-1)**

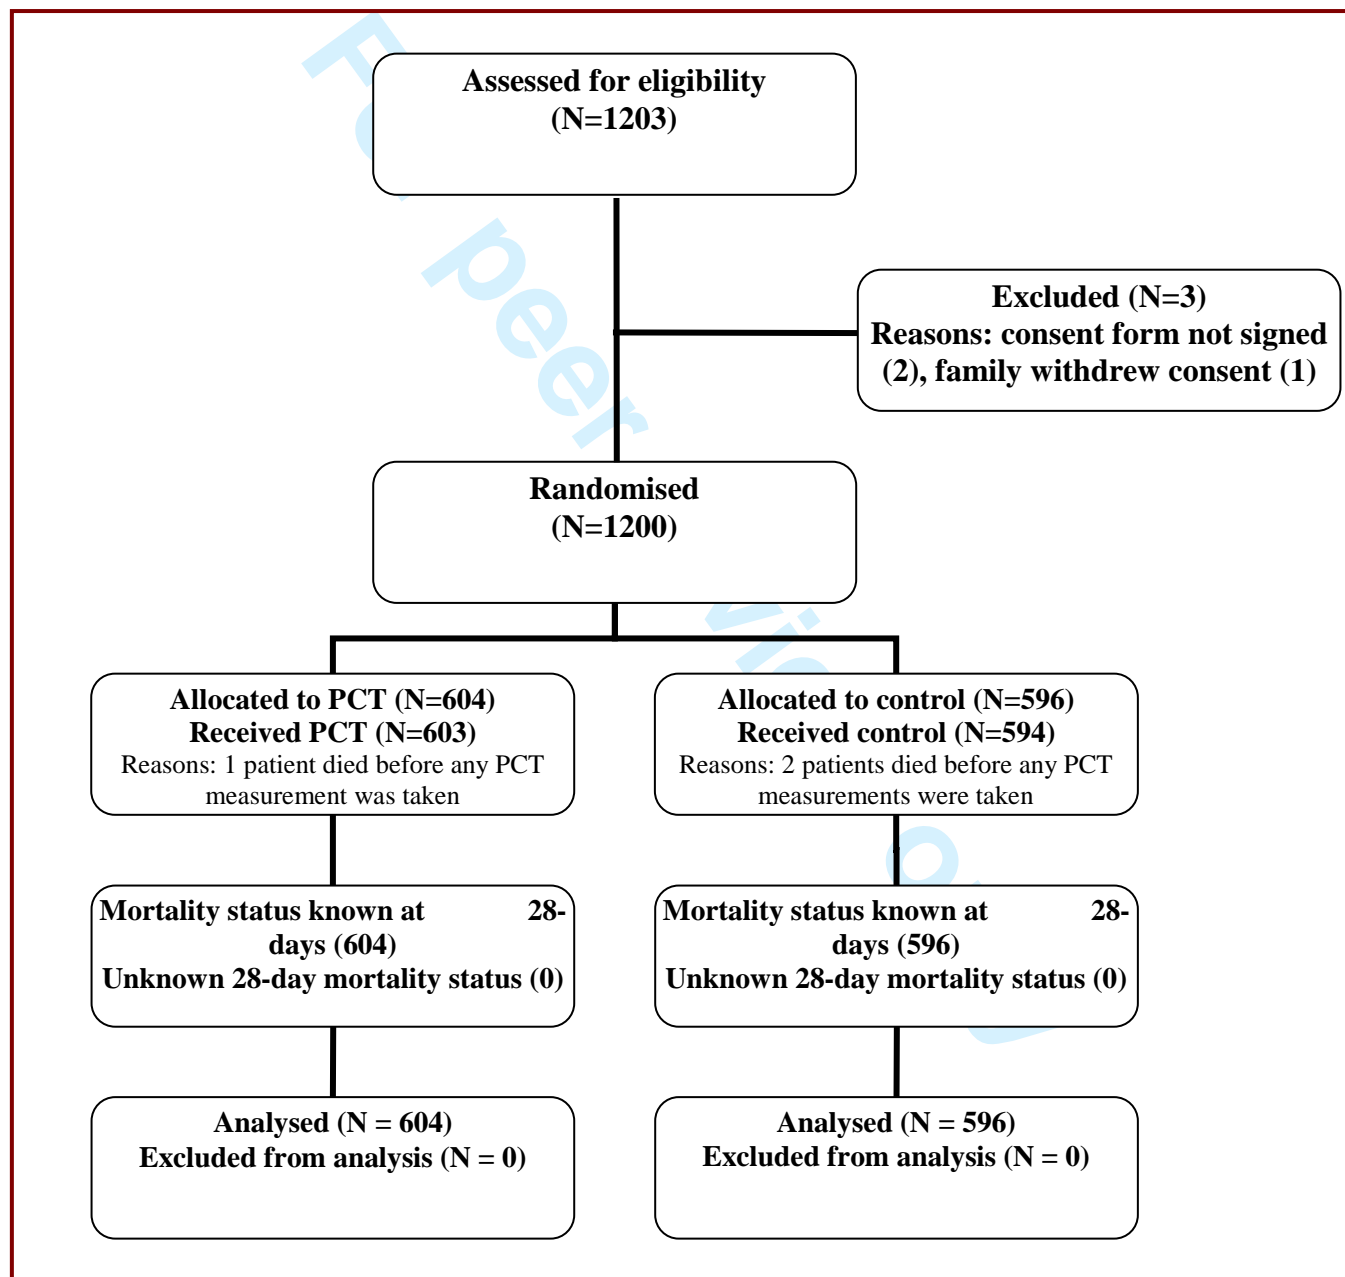

Trial profile.

**2. Baseline characteristics**

Table 1: Baseline characteristics

|                                                                  | Standard-of-care-only | Procalcitonin-guided | Overall          |
|------------------------------------------------------------------|-----------------------|----------------------|------------------|
|                                                                  | <u>n=596</u>          | <u>n=604</u>         | <u>n=1200</u>    |
| Age (Yr.) Median (IQR)                                           | 67 (58–75)            | 67 (58–76)           | 67 (58–76)       |
| Male sex – no. (%)                                               | 333 (55.9%)           | 330 (54.6%)          | 663 (55.3%)      |
| Body Mass Index – Median kg/m <sup>2</sup> (IQR)                 | 24.7 (22.0–27.8)      | 25.0 (22.5–28.7)     | 24.8 (22.2–27.9) |
| APACHE II Score - Median (IQR)                                   | 18 (13–24)            | 18 (13–25)           | 18 (13–24)       |
| Surgical patient – no. (%)                                       | 260 (43.6)            | 227 (37.6)           | 487 (40.6)       |
| <b>Chronic co-morbidity* - no. (%)</b>                           |                       |                      |                  |
| No chronic co-morbidities                                        | 102 (17.1)            | 123 (20.4)           | 225 (18.8)       |
| 1 chronic co-morbidities                                         | 279 (46.8)            | 257 (42.6)           | 536 (44.7)       |
| 2 chronic co-morbidities                                         | 173 (29.0)            | 171 (28.3)           | 344 (28.7)       |
| ≥3 chronic co-morbidities                                        | 42 (7.1)              | 53 (8.8)             | 95 (7.9)         |
| <b>Acute illness/reason for admittance to ICU – no. (%)</b>      |                       |                      |                  |
| Central nervous system incl. Unconsciousness                     | 78 (13.1)             | 101 (16.7)           | 179 (14.9)       |
| Respiratory failure                                              | 422 (70.8)            | 410 (67.9)           | 832 (69.3)       |
| Circulatory failure                                              | 263 (44.1)            | 257 (42.6)           | 520 (43.3)       |
| Gastro-intestinal disease                                        | 128 (21.5)            | 96 (15.9)            | 224 (18.7)       |
| Renal disease                                                    | 81 (13.6)             | 103 (17.1)           | 184 (15.3)       |
| Post-operative complications                                     | 123 (20.6)            | 106 (17.6)           | 229 (19.1)       |
| Trauma                                                           | 113 (19.0)            | 106 (17.6)           | 219 (18.3)       |
| Other                                                            | 68 (11.4)             | 57 (9.4)             | 125 (10.4)       |
| <b>Indicators of severity</b>                                    |                       |                      |                  |
| Temperature, °C (median (IQR), n=1136)                           | 37.3 (36.3–38.1)      | 37.4 (36.4–38.3)     | 37.3 (36.3–38.2) |
| Mean arterial pressure, mmHg (median (IQR) n=1195)               | 71 (60–84)            | 72 (63–85)           | 71 (62–84)       |
| Heart frequency (median (IQR) n=1197)                            | 100 (82–116)          | 100 (84–117)         | 100 (83–117)     |
| Need for vasopressor/inotropic drug <sup>†</sup> (% , n=1200)    | 315 (52.9)            | 326 (53.4)           | 641 (53.4)       |
| PaO <sub>2</sub> /PaCO <sub>2</sub> ratio (median (IQR), n=1178) | 1.85 (1.27–2.62)      | 1.82 (1.29–2.53)     | 1.83 (1.28–2.59) |
| pH (median (IQR) n=1185)                                         | 7.29 (7.21–7.39)      | 7.29 (7.20–7.38)     | 7.29 (7.20–7.38) |
| Mechanical ventilation used (% , n=1200)                         | 401 (67.3%)           | 401 (66.4%)          | 802 (66.8%)      |
| Creatinine μmol/L (median (IQR) n=1167)                          | 119 (78–197)          | 119 (75–208)         | 119 (76–202)     |
| Dialysis required (% , n=1200)                                   | 88 (14.8%)            | 86 (14.2%)           | 174 (14.5)       |
| Bilirubin, μmol/L (median (IQR) n=1109)                          | 10 (6–17)             | 10 (5–18)            | 10 (5–17)        |
| <b>Infection, clinical assessment ‡ – no. (%)</b>                |                       |                      |                  |
| No infection                                                     | 118 (19.8)            | 86 (14.2)            | 204 (17.0)       |
| Localized infection or Sepsis                                    | 266 (44.6)            | 271 (44.9)           | 537 (44.8)       |
| Severe sepsis/ septic Shock                                      | 212 (35.6)            | 247 (40.9)           | 459 (38.3)       |
| <b>Site of infection § – no. (%)</b>                             |                       |                      |                  |
| CNS                                                              | 12 (2.0)              | 35 (5.8)             | 47 (3.9)         |
| Respiratory                                                      | 292 (50.0)            | 324 (53.6)           | 616 (51.3)       |
| Gastrointestinal                                                 | 149 (25.0)            | 145 (24.0)           | 294 (24.5)       |
| Urinary                                                          | 28 (4.7)              | 42 (7.0)             | 70 (5.8)         |
| Other                                                            | 52 (8.7)              | 41 (6.8)             | 93 (7.8)         |
| <b>Biomarkers</b>                                                |                       |                      |                  |
| Alert-PCT    – no. (%)                                           | 279 (47.0)            | 312 (51.7)           | 591 (49.4)       |
| Leukocytes, x10 <sup>9</sup> – median (IQR)                      | 13.0 (8.8–18.1)       | 12.4 (8.0–18.1)      | 12.8 (8.4–18.1)  |
| C-reactive protein, mg/L – median (IQR)                          | 152 (54–266)          | 161 (56–271)         | 157 (56–271)     |

1 Interquartile range (IQR). Acute Physiology and Chronic Health Evaluation II score (APACHE II) ranges from 0 to 71. \*Chronic co-  
2 morbidity: Earlier diagnosed via hospital admission: heart failure, lung disease, cancer, diabetes, alcohol abuse, chronic infection,  
3 neurological disease, renal diseases, liver disease, gastro-intestinal disease, autoimmune disease, cancer and psychiatric disorders.  
4 Acute illness: persons can have several. 'Other' includes liver disease, haemorrhage, haematological disease and poisoning.  
5 †Vasopressors/inotropic drugs are considered to be epinephrine, nor-epinephrine, dopamine and dobutamine. ‡ Infections were rated  
6 according to the ACCP/SCCM definitions; investigators were trained in using them. § Site of infection: patients can have more than  
7 one. ||Alert-PCT: Procalcitonin-level not decreasing by at least 10% from the previous day and above 1.0 ng/ml. If only one  
8 measurement is available: Absolute procalcitonin-level above 1.0 ng/ml.  
9  
10  
11

12 **Table 1. Baseline characteristics of the study participants.**  
13  
14  
15  
16  
17  
18  
19  
20  
21  
22  
23  
24  
25  
26  
27  
28  
29  
30  
31  
32  
33  
34  
35  
36  
37  
38  
39  
40  
41  
42  
43  
44  
45  
46  
47  
48  
49  
50  
51  
52  
53  
54  
55  
56  
57  
58  
59  
60

For peer review only

Table 2: Follow up characteristics

| Follow up measurement                                                                                                                                                                                                       | Control group (N=596) | PCT-guided group (N=604) | Overall (n=1200) |
|-----------------------------------------------------------------------------------------------------------------------------------------------------------------------------------------------------------------------------|-----------------------|--------------------------|------------------|
| Patients followed and alive for 28 days (N., %)                                                                                                                                                                             |                       |                          |                  |
| Patients followed for 28 days (incl. those who died in the first 28 days) (N., %)                                                                                                                                           |                       |                          |                  |
| Status at 28 days (n = ):<br>Alive<br>Dead                                                                                                                                                                                  |                       |                          |                  |
| Days spent in ICU      Median (IQR) (as in PASS-I)                                                                                                                                                                          |                       |                          |                  |
| Days spent in Danish hospital within 28 days      Median (IQR)                                                                                                                                                              |                       |                          |                  |
| Patients with a complete 28 day follow up for respiratory failure (mech. Vent., PaO <sub>2</sub> and FiO <sub>2</sub> )                                                                                                     |                       |                          |                  |
| Days followed within 28 days for respiratory failure (mech. Vent, PaO <sub>2</sub> and FiO <sub>2</sub> ) of total days in trial ((denom. = 604 x 28) this can be drawn from the admission list in combination w. database) |                       |                          |                  |
| Patients with 28 day follow up for renal failure (dialysis – same as prev.)                                                                                                                                                 |                       |                          |                  |
| Days followed within 28 days for renal failure ( <u>dialysis</u> ) of total days in trial (denominator = 604 x 28 and 596 x 28 days) (same as prev.)                                                                        |                       |                          |                  |
| Patients with 28 day follow up for renal failure (eGFR)                                                                                                                                                                     |                       |                          |                  |
| Days followed within 28 days for renal failure ( <u>eGFR</u> ) of total days in trial (denominator = 604 x 28 and 596 x 28 days)                                                                                            |                       |                          |                  |
| Patients with 28 day follow up for Platelets                                                                                                                                                                                |                       |                          |                  |
| Patients with 28 day follow up for Bilirubin                                                                                                                                                                                |                       |                          |                  |
| Patients with 28 day follow up for antibiotic consumption                                                                                                                                                                   |                       |                          |                  |

n\*s refers to the total number of patients who had follow up for 28 days.

**28-day follow up is: Follow up until death within 28 days OR until day 28. For respiratory failure follow up is done for all ICU admissions. For renal failure, follow up is done for all dialysis treatment (ICU+other dialysis competent hospital units) and for all creatinine and carbamide measurements performed within 28 days (ICU + non-ICU admissions). For platelets and bilirubin, follow up is done for all measurements performed within 28 days (ICU + non-ICU admissions)**

**STRATIFICATION (\*S) / test for interaction: (regarding the below analyses in Section 2 + 3)**

1. Age (limit initially 65 y, if significant interaction, more age groups)
2. APACHE II score (limit initially 20, if significant interaction, more APACHE II groups,
3. Site 1-9.
4. Severe Sepsis/septic Shock vs. Milder or No infection at Baseline
5. Calendar date of inclusion into PASS. Recruited: 9<sup>th</sup> Jan 2006 – 31<sup>st</sup> December 2007 (~430 patients) vs. 1<sup>st</sup> of Jan 2008 – 2<sup>nd</sup> of June 2009 (~770 patients).
6. Surgical patient / medical patient [Surgical = All patients with mark in Baseline “B6”, or “B12” or marked “Yes” in “L”]
7. Gender

## **SECTION 2. Exposure – Antibiotic usage**

Follow up: All patients were followed up regarding antibiotic consumption: 1) In the ICU in the primary PASS-CRF, 2) All ICU-surviving patients, not staying in the ICU for 28 days, were followed up for antibiotic consumption in the non-ICU, they were discharged to after ICU.

General: The aims of these analyses are to investigate the impact of performing PCT-guided empiric antibiotic interventions according to a progressive algorithm on the consumption of antibiotics. This is to be illustrated by analyses exploring 1) spectrum, 2) quantity and 3) duration of therapy in the two arms.

### **The aim is:**

- a) To investigate the difference in exposure in general to antibiotics in the two arms of the PASS trial and more specifically to broad-spectrum antibiotics.

### **This is done in the following analyses (PCT vs. Control):**

- 1) The total number of days within the 28 day follow-up period with any antibiotic treatment (or proportion of follow-up time): [Not done Yet]
- 2) The total consumption of any antibiotic in weight (grams within 28 days) [Not done Yet]
- 3) The total consumption per ICU day of any antimicrobial [DONE]
- 4) The total consumption of betalactam drugs active against most Extended Spectrum Beta-lactamases and wild-type *Pseudomonas aeruginosa* (a. Meropenem and other pseudomonas active carbapenems, OR b. Piperacillin/tazobactam OR c. 4.generation Cephalosporins). [or proportion of days in these treatments] [Not done Yet]
- 5) The total no. of days within the 28-day follow up period with treatment with any flour-quinolone (ciprofloxacin, moxifloxacin and others) [or proportion of days in these treatments] [Not done Yet]
- 6) The total no. of days within the 28-day follow up period with treatment with any glycopeptide (Vancomycin, Teicoplanin) [or proportion of days in these treatments] [Not done Yet]
- 7) The total no. of days within the 28-day follow up period with treatment with fluconazole [or proportion of days in these treatments] [Not done Yet]

### **Consumption of antimicrobials in the intensive care unit**

|                                                                       |                    |                    |                      |        |
|-----------------------------------------------------------------------|--------------------|--------------------|----------------------|--------|
| Length of antimicrobial treatment in ICU, days (median, IQR)          | 4 (3– 10)          | 6 (3– 11)          | -                    | 0.001  |
| Quantity of antimicrobials administered per ICU day (g) (median, IQR) | 6.7g (4.5g– 12.5g) | 8.6g (5.3g– 13.7g) | -                    | <0.001 |
| Number (%) ICU days spent with at least three antimicrobials          | 2721 (57.7%)       | 3570 (65.5%)       | -7.9% (-9.7%– -6.0%) | 0.002  |

\*Counted from the time of sampling. Only samples later to become positive. Cultures with coagulase negative staphylococci, corynebacteria and propionebacteria are not included. † Including localised infection, mild sepsis, severe sepsis and septic shock.

p-values for the number of days spent with each factor were generated by testing the proportion of intensive care days spent with each factor using non-parametric tests. ICU: Intensive care unit

**Table 3. Antibiotic consumption**

**Admission time within 28 days**

1. Number of days admitted to hospital within 28 days after recruitment. Median + IQR. (PCT vs. Control)

**Subgroup Analysis: Total use of Antimicrobial chemotherapy**

1. Total antibiotic prescription days (all AMCs received, where all AMCs are weighted equally and summed per day, e.g.:→ possible to have e.g. 30 prescription days in 10 days ICU)

**Table 3: Number of AMCs received per day (over all days)**

|                                     | PCT-arm | Control-arm | P-value |
|-------------------------------------|---------|-------------|---------|
| AMC total (N,. %)                   |         |             |         |
| Recruited 09/01/06 – 31/12/07       |         |             |         |
| Recruited 01/01/08 – 02/06/09       |         |             |         |
| Age <65 years                       |         |             |         |
| Age ≥65 years                       |         |             |         |
| APACHE II <20                       |         |             |         |
| APACHE II ≥20                       |         |             |         |
| Bispebjerg                          |         |             |         |
| Gentofte                            |         |             |         |
| Glostrup                            |         |             |         |
| Herlev                              |         |             |         |
| Hillerød                            |         |             |         |
| Hvidovre                            |         |             |         |
| Roskilde                            |         |             |         |
| Skejby                              |         |             |         |
| Århus                               |         |             |         |
| Severe Sepsis or septic shock at BL |         |             |         |
| Milder or no infection at BL        |         |             |         |
| Surgical patient                    |         |             |         |
| Non-surgical patient                |         |             |         |
| Gender                              |         |             |         |

**MICROBIOLOGY**

Follow up: All patients were followed up via the electronic registers at the microbiologic depts., who service the PASS-ICU's regarding all microbiologic samples performed from baseline and until 28 days after. Data have been merged in the PASS-database.

**Table 4:** Number of culture samples performed within 28-days from randomisation [Not done Yet – JU handles this]

| Intervention                   |                | PCT arm<br>N = | Control Arm<br>N = | P-value |
|--------------------------------|----------------|----------------|--------------------|---------|
| <b>Microbiology:</b>           | <b>N., (%)</b> |                |                    |         |
| <b>Blood Cultures</b>          | N. Yes, (%)    |                |                    |         |
| <b>Urine Cultures</b>          | N. Yes, (%)    |                |                    |         |
| <b>Airway Cultures</b>         | N. Yes, (%)    |                |                    |         |
| <b>Samples from other foci</b> | N. Yes, (%)    |                |                    |         |



## **SECTION 3a: Estimating the degree of Organ Failure (OF)**

Follow up: All patients were followed up regarding respiratory failure (mech. Vent + physiologic parameters) and renal failure at 1) the PASS-ICU where the patient was recruited in the primary PASS-crf, 2) regarding mech. Ventilation and physiologic parameters and renal failure at any other PASS-ICU within the 28 day period (when patients were discharged to such an ICU, 3) in the case that a patient was discharged within the 28 day period to a non-PASS ICU (seldom), follow up was made for mech. Vent. and physiologic parameters and renal failure in hospitals "Rigshospitalet" and "Bispebjerg", since only very few ICU days were spent at any other ICU within the 28 day period (48 days of approx 9900 days = approx 0.5%).

The purpose of these analyses is to explore in detail, the quantity of the occurrence of secondary endpoints in the PASS-trial, especially respiratory organ failure and renal organ failure.

Genuine hypothesis: High usage of broad spectrum antibiotics as used in the PASS trial, results in substantially reduced organ function (respiratory, renal and liver) and compromised coagulation and a likewise substantially increased time with manifest organ failure as defined clinically (need for organ support) AND biochemically/physiologically (measured objective parameters).

**NB: Analyzes are summarized in the table 5 below**

time)

### **A. Renal Failure:**

- a. Median/ Mean eGFR for day1 – day10
- b. Median/ Mean eGFR for day11 – day28
- c. Median/Mean eGFR for day1 – day28 (a+b) [eGFR on days in columns in a figure and AUC for the columns]
- d. Median/Mean Carbamide for day1- day10
- e. Median/ Mean Carbamide for day11 – day28
- f. Median/Mean Carbamide for day1 – day28 (a+b) [Carbamide level on days in columns in a figure and AUC for the columns]
- g. Median/Mean Platelet count for day 1-28 [[platelet on days in columns in a figure and AUC for the columns]
- h. Median/Mean Bilirubin [Bilirubin on days in columns in a figure and AUC for the columns]
- i. No. of days within 28 days with eGFR < 60 ml/min/1.73 m<sup>2</sup>
- j. No. of days within day1 – day10 with eGFR < 60 ml/min/1.73 m<sup>2</sup>
- k. No. of days within day1 – day10 with dialysis
- l. No. of days within day11 – day28 with dialysis
- m. No. of days within day1 – day28 with dialysis

C + F+ G + H are all part of one figure with 4 panels.

Explanations: A: Dialysis:

Patients are categorized on days with ND or NA as dialysis=0, since this means patient has been discharged to home. All admissions within 28 days have been drawn from the central hospital register (Green System) and all admissions at dialysis capable departments have been followed up with dialysis.

B: eGFR:

In the ICU, patients are categorized with a new eGFR every day (done in PASS).

Patients are categorized on the basis of their status of eGFR on the last day of ICU. This status is kept until a creatinine measurement is done (on which day the status is changed to a new eGFR). This status is then kept until the next time creatinine is measured – and so forth. In this way every day from 1 – 28 is given an eGFR status.

**In summary, the same principle is used:** From day 1, the first time a creatinine is measured, a eGFR is calculated. Next time the patient has a creatinine measurement, the patient is re-categorized with a new eGFR. That eGFR is kept until the next creatinine measurement etc.

**Table 5. Prevalence and duration of organ failure and other severe disturbances (PCT vs. Control)**

|                                                                                                 | PCT arm<br>(n = ) | Control<br>Arm<br>(n = ) | P-<br>value |
|-------------------------------------------------------------------------------------------------|-------------------|--------------------------|-------------|
| <b>Kidney Failure</b> mL/min/1.73 m <sup>2</sup> (N. days, % of total days):                    |                   |                          |             |
| Normal: GFR > 90                                                                                |                   |                          |             |
| Mildly impaired: 60–89                                                                          |                   |                          |             |
| Moderately/severely impaired: GFR <60                                                           |                   |                          |             |
| <b>Kidney Failure</b> Median/ Mean eGFR for day1 – day10                                        |                   |                          |             |
| <b>Kidney Failure</b> Median/ Mean eGFR for day11 – day28                                       |                   |                          |             |
| <b>Kidney Failure</b> Median/Mean eGFR for day1 – day28 (a+b)                                   |                   |                          |             |
| <b>Kidney Failure</b> Median/Mean Carbamide for day1- day10                                     |                   |                          |             |
| <b>Kidney Failure</b> Median/ Mean Carbamide for day11 – day28                                  |                   |                          |             |
| <b>Kidney Failure</b> No. of days within 28 days with eGFR < 60 ml/min/1.73 m <sup>2</sup>      |                   |                          |             |
| <b>Kidney Failure</b> No. of days within day1 – day10 with eGFR < 60 ml/min/1.73 m <sup>2</sup> |                   |                          |             |
| <b>Kidney Failure</b> No. of days within day1 – day10 with dialysis                             |                   |                          |             |
| <b>Kidney Failure</b> No. of days within day11 – day28 with dialysis                            |                   |                          |             |
| <b>Kidney Failure</b> No. of days within day1 – day28 with dialysis                             |                   |                          |             |

Table with summarized analyses.

## **SECTION 3b: Attempting to explain the reason for organ failure (if OF is confirmed in section 3a)**

## Antimicrobial toxic explanation

Genuine hypotheses:

- 1) High Exposure (at least 5 or at least 10 days) to a certain combination of antibiotics (Pip/Tazo+Cipro OR Meropenem + Cipro OR Pip/Tazo + Vanco OR Meropenem + Vanco) causes OF

For 2-6: Estimate accumulated risk for day 1, 2, 3 etc. separately in both PCT group and control group.

- 2) Treatment for more than 4 days with Pip/Tazo causes OF (also 10 days)
- 3) Treatment for more than 4 days with Ciprofloxacin causes OF (also 10 days)
- 4) Treatment for more than 4 days with Meropenem causes OF (also 10 days)
- 5) Treatment for more than 4 days with Vancomycin causes OF (also 10 days)
- 6) Treatment for more than 4 days with Cefuroxim causes OF (also 10 days)

For the below analyses two composite endpoints are used for the Pulmonary/renal OF:

- 1) **Organ failure endpoint A:** Clinical Organ Failure judgment: Endpoint=1 for any day with dialysis. If both are present, Endpoint=2. Results are presented as "Clinical Organ Failure Days"
- 2) **Organ failure endpoint B:** Objective Organ failure measures: Endpoint =1 for any day with eGFR <30, repeated with <60 ml/min/1,73 m<sup>2</sup>. "Objective Organ Failure Days"

Analyses:

### A. Objective Organ failure endpoint:

As above, 1) – 6).

- 1) Analyze the median "Objective Organ Failure Days" to occur from "P-T treatment day 5" until 10 days later (counting endpoints for next 10 days). Censor at death.
- 2) Analyze the median "Objective Organ Failure Days" to occur from "Meropenem treatment day 5" until 10 days later (counting endpoints for next 10 days). Censor at death

### B. Multiple Effects models:

Regarding renal dysfunction: Analyze renal recovery in eGFR progression per day on different drugs day 1-10 (Meropenem / Piperacillin-tazobactam / Ciprofloxacin / Cefuroxim), control for other known predictors of renal failure. Additionally after discontinuation of these drugs.

## Sensitivity analyzes: Cox or Logistic Regression ?

Endpoint: Binary endpoint. To be defined according to the median number of organ failure days within 10 days after exposure for 5 days.

Endpoint 1a: [ $>$ median number of “clinical organ failure days”]

Endpoint 1b: [ $>$ median number of “clinical organ failure days”+2 days]

Endpoint 2a: [ $>$ median number of “objective organ failure days”]

Endpoint 2b: [ $>$ median number of “objective organ failure days”+2 days]

Risk variables to be entered:

- a. Treatment for  $\geq 4$  days with Pip/tazo
- b. Treatment for  $\geq 4$  days with Meropenem
- c. Treatment for  $\geq 4$  days with Ciprofloxacin
- d. Treatment for  $\geq 4$  days with Vancomycin
- e. Treatment for  $\geq 4$  days with Pip/tazo + Ciprofloxacin (all 4 days)
- f. Treatment for  $\geq 4$  days with Meropenem + Ciprofloxacin (all 4 days)
- g. Treatment for  $\geq 4$  days with Pip/tazo + Vancomycin (all 4 days)
- h. Treatment for  $\geq 4$  days with Meropenem + Ciprofloxacin (all 4 days)
- i. Treatment for  $\geq 4$  days with Meropenem + Vancomycin (all 4 days)
- j. APACHE II  $\geq 20$
- k. Age  $\geq 65$
- l. Surgical patient
- m. Severe sepsis/septic shock

NB: Treatment count start days 1 – 13 (so 5 days complete on day 5 – 18).

Patients with pauses in the administration of  $\geq 1$  day  $\rightarrow$  exclude

Only count the first administration

Endpoints:

“Clinical Organ Failure Days” and “Objective Organ Failure Days” both as defined above

$\rightarrow$ Transformed to Binary endpoint:

Endpoint 1a: [ $>$ median number of “clinical organ failure days”]

Endpoint 2a: [ $>$ median number of “objective organ failure days”]

(as above in the sensitivity analysis)

1  
2 PASS-II, organ failure – authors,  
3 Forfattere  
4  
5 Chip: JU+JDL+LRN  
6  
7  
8 KMA Hvh/Diacenter: BEL  
9  
10 Glostrup: Mulige: Asger, Anne, Ditte  
11  
12 Hvh: Mulige: Peder C, Jesper, Morten  
13  
14 Herlev: Mulige: Peter, Hamid, Tina  
15  
16 Gentofte: Mulige: Thomas, Katrin  
17  
18 Hillerød: Mulige: Morten, Lars, Kristian A?  
19  
20  
21 Roskilde: Mulige : Niels-Erik  
22  
23 Århus: Mulige: Kim + Mads  
24  
25 Skejby: Mulige: Paul  
26  
27  
28  
29  
30  
31  
32  
33  
34  
35  
36  
37  
38  
39  
40  
41  
42  
43  
44  
45  
46  
47  
48  
49  
50  
51  
52  
53  
54  
55  
56  
57  
58  
59  
60

# Protocol

**A randomised, single-blinded, multicentre trial to investigate if clinical management guided by daily standardised Procalcitonin measurements can reduce the mortality in critically ill patients**

**The Procalcitonin and Survival Study (PASS)**

**Version of protocol: 3.1**

**Date: December 2006**

**Intensive Care Units from many University Hospitals all over Denmark will participate:**

**Sponsor: Scientific:**

**Copenhagen HIV Programme (CHIP) 044, Hvidovre University Hospital, Denmark**

**: Economic: Danish Research Council (Danish State) and other independent research foundations**

**Protocol co-ordinator**

**Jens-Ulrik Stæhr Jensen**

H:S Hvidovre University Hospital

DK - 2650 Hvidovre

Denmark

Phone: +45 36 32 33 07

Fax: +45 36 47 33 40

E-mail: [koordinator@pass-studiet.dk](mailto:koordinator@pass-studiet.dk)

**INVESTIGATOR PROTOCOL AGREEMENT PAGE**

*THIS AGREEMENT IS EQUIVALENT TO A "SIGNED PROTOCOL"*

**The PASS Trial**

Name and qualifications of investigator:

*Name of Investigator:* \_\_\_\_\_

*Post held:* \_\_\_\_\_

*Clinical Centre:* \_\_\_\_\_

I agree:

- to assume responsibility for the proper conduct of the PASS Trial at this site.
- to conduct the trial in compliance with this protocol, any future amendments, and with any other trial conduct procedures provided.
- not to implement any deviations from or changes to the protocol without agreement from the sponsor and prior review and written approval from the Independent Ethics Committee (IEC), except where necessary to eliminate an immediate hazard to the subjects, or for administrative aspects of the trial (where permitted by all applicable regulatory requirements).
- that I am thoroughly familiar with the appropriate use of the Procalcitonin test and the interpretation of the test results, as described in this protocol, and any other information provided by the manufacturer of the test and by the PASS Coordinating centre.
- that I am aware of, and will comply with, "Good Clinical Practice" (ICH-GCP Guideline (CPMP/ICH/135/95, Directive 2001/20/EC)) and all applicable regulatory requirements.
- to ensure that all persons assisting me with the trial are adequately informed about the Procalcitonin test and interpretation and of their trial-related duties and functions as described in the protocol.

\_\_\_\_\_  
Signature of investigator

\_\_\_\_\_  
Date

*One signed copy each to be held by the Investigator and PASS Co-ordinating centre.*

**15/10/2007**

**TABLE OF CONTENTS**

|                                                                                                              |           |
|--------------------------------------------------------------------------------------------------------------|-----------|
| <b>PROTOCOL SUMMARY</b>                                                                                      | <b>5</b>  |
| <b>1 TRIAL BACKGROUND AND RATIONALE</b>                                                                      | <b>7</b>  |
| 1.1 Background                                                                                               | 7         |
| 1.2 Rationale - summary                                                                                      | 8         |
| 1.3 Procalcitonin analysing methods                                                                          | 9         |
| 1.4 Rationale for a 24 h interval between blood sampling                                                     | 10        |
| 1.5 Procalcitonin and immuno-compromised patients                                                            | 10        |
| 1.6 Studies on Procalcitonin biology and bacterial infection                                                 | 10        |
| 1.6.1 In vitro and animal studies                                                                            | 10        |
| 1.6.2 Human observational studies                                                                            | 11        |
| 1.6.3 Clinical trials                                                                                        | 11        |
| <b>2 TRIAL OBJECTIVES AND ENDPOINTS</b>                                                                      | <b>11</b> |
| 2.1 Trial Objectives                                                                                         | 11        |
| 2.2 Primary Objectives                                                                                       | 11        |
| 2.3 Secondary Objectives                                                                                     | 11        |
| 2.4 Trial Endpoint(s)                                                                                        | 12        |
| <b>3 INVESTIGATIONAL PLAN</b>                                                                                | <b>13</b> |
| 3.1 Trial Design                                                                                             | 13        |
| 3.2 Trial Population                                                                                         | 14        |
| 3.2.1 Inclusion Criteria                                                                                     | 14        |
| 3.2.2 Exclusion Criteria                                                                                     | 15        |
| 3.3 Treatment During Trial                                                                                   | 15        |
| 3.3.2 Change of PCT-guidance strategy during the trial                                                       | 18        |
| 3.3.2.1 Randomised PCT-guided interventions                                                                  | 18        |
| 3.3.2.2 The non-PCT guided interventions                                                                     | 18        |
| 3.3.3 Antimicrobial Drugs and Dosages                                                                        | 18        |
| 3.3.3.1 Overdose and Toxicity                                                                                | 19        |
| <b>4 MEASUREMENTS AND EVALUATION</b>                                                                         | <b>20</b> |
| 4.1 Time and Events Schedule                                                                                 | 20        |
| 4.1.1 Pre-entry Evaluations                                                                                  | 20        |
| 4.2 On Trial Evaluations                                                                                     | 22        |
| 4.3 Trial drugs                                                                                              | 24        |
| 4.3.1 Dosing Details                                                                                         | 24        |
| 4.3.2 Collection of Blood Samples for Daily Analysis                                                         | 24        |
| <b>5 DATA ANALYSIS METHODS</b>                                                                               | <b>26</b> |
| 5.1 Sample Size Determination                                                                                | 26        |
| 5.2 General Considerations                                                                                   | 26        |
| 5.2.1 Analysis Populations                                                                                   | 26        |
| 5.2.2 Interim Analysis                                                                                       | 27        |
| 5.2.3 Other Issues                                                                                           | 27        |
| 5.3 Efficacy                                                                                                 | 27        |
| 5.3.1 Primary Efficacy Endpoint                                                                              | 27        |
| 5.3.2 Secondary Efficacy Endpoint(s)                                                                         | 27        |
| 5.3.2.1 Other mortality assessments                                                                          | 27        |
| 5.3.3 Combined evaluation of mortality / occurrence of serious bacterial infection while admitted to the ICU | 28        |
| 5.4 Safety                                                                                                   | 29        |



|    |                    |                                                                                                                           |
|----|--------------------|---------------------------------------------------------------------------------------------------------------------------|
| 1  |                    |                                                                                                                           |
| 2  |                    |                                                                                                                           |
| 3  |                    |                                                                                                                           |
| 4  | <b>6</b>           | <b>ADVERSE EVENTS (AE) AND SERIOUS ADVERSE EVENTS (SAE) _____ 29</b>                                                      |
| 5  | 6.1                | Definition of an Adverse Event _____ <b>Fejl! Bogmærke er ikke defineret.</b>                                             |
| 6  | 6.1.2              | Definition of a Serious Adverse Event _____ <b>Fejl! Bogmærke er ikke defineret.</b>                                      |
| 7  | 6.1.3              | Protocol-specific Exemptions from the AE and SAE Definition _____ <b>Fejl! Bogmærke er ikke defineret.</b>                |
| 8  |                    |                                                                                                                           |
| 9  | 6.2                | Clinical Laboratory Abnormalities and Other Abnormal Assessments as AEs and SAEs <b>Fejl! Bogmærke er ikke defineret.</b> |
| 10 | 6.3                | Recording of the AEs and SAEs in the CRF _____ <b>Fejl! Bogmærke er ikke defineret.</b>                                   |
| 11 | 6.4                | Documenting AEs and SAEs _____ <b>Fejl! Bogmærke er ikke defineret.</b>                                                   |
| 12 | 6.5                | Follow-up of AEs and SAEs _____ <b>Fejl! Bogmærke er ikke defineret.</b>                                                  |
| 13 | 6.6                | Time-lines for reporting of SAEs _____ <b>Fejl! Bogmærke er ikke defineret.</b>                                           |
| 14 |                    |                                                                                                                           |
| 15 | <b>7</b>           | <b>TRIAL ADMINISTRATION _____ 30</b>                                                                                      |
| 16 | 7.1                | Data Collection _____ 30                                                                                                  |
| 17 | 7.2                | Regulatory and Ethical Considerations _____ 31                                                                            |
| 18 | 7.2.1              | Regulatory Authority Approval _____ 31                                                                                    |
| 19 | 7.2.2              | Ethics Approval _____ 31                                                                                                  |
| 20 | 7.2.3              | Subject Informed Consent _____ 31                                                                                         |
| 21 | 7.3                | Trial Monitoring _____ 32                                                                                                 |
| 22 | 7.4                | Quality Assurance _____ 33                                                                                                |
| 23 | 7.5                | Trial and Site Closure _____ 33                                                                                           |
| 24 | 7.6                | Records Retention _____ 34                                                                                                |
| 25 | 7.7                | Information Disclosure and Inventions _____ 34                                                                            |
| 26 | 7.7.1              | Confidentiality _____ 34                                                                                                  |
| 27 | 7.7.2              | Publication _____ 35                                                                                                      |
| 28 | 7.8                | Indemnification and Compensation for Injury _____ 35                                                                      |
| 29 | <b>8.</b>          | <b>REFERENCES _____ 36</b>                                                                                                |
| 30 | <b>9.</b>          | <b>APPENDICES _____ 43</b>                                                                                                |
| 31 | <b>Appendix 1:</b> | <b>The Declaration of Helsinki _____ 43</b>                                                                               |
| 32 | <b>Appendix 2:</b> | <b>Abbreviations _____ 44</b>                                                                                             |
| 33 | <b>Appendix 3:</b> | <b>Table of conversion factors for laboratory units _____ 45</b>                                                          |
| 34 | <b>Appendix 4:</b> | <b>Table of the used antibacterial and antifungal drugs _____ 48</b>                                                      |
| 35 |                    |                                                                                                                           |
| 36 |                    |                                                                                                                           |
| 37 |                    |                                                                                                                           |
| 38 |                    |                                                                                                                           |
| 39 |                    |                                                                                                                           |
| 40 |                    |                                                                                                                           |
| 41 |                    |                                                                                                                           |
| 42 |                    |                                                                                                                           |
| 43 |                    |                                                                                                                           |
| 44 |                    |                                                                                                                           |
| 45 |                    |                                                                                                                           |
| 46 |                    |                                                                                                                           |
| 47 |                    |                                                                                                                           |
| 48 |                    |                                                                                                                           |
| 49 |                    |                                                                                                                           |
| 50 |                    |                                                                                                                           |
| 51 |                    |                                                                                                                           |
| 52 |                    |                                                                                                                           |
| 53 |                    |                                                                                                                           |
| 54 |                    |                                                                                                                           |
| 55 |                    |                                                                                                                           |
| 56 |                    |                                                                                                                           |
| 57 |                    |                                                                                                                           |
| 58 |                    |                                                                                                                           |
| 59 |                    |                                                                                                                           |
| 60 |                    |                                                                                                                           |

**A randomised, single blinded, multicentre trial to evaluate whether daily Procalcitonin measurements and immediate diagnostic and therapeutic response on abnormal values and day-to-day changes can reduce the mortality of critically ill patients in the Intensive Care Unit.**

## The Procalcitonin And Survival Study (PASS)

### PROTOCOL SUMMARY

#### Inclusion:

Fulfilment of all of the following three criteria:

- 1 Male or female, aged  $\geq 18$  years of age.
- 2 Admitted to the participating intensive care units (ICU) at following hospitals: Hvidovre Hospital; Bispebjerg Hospital; Herlev Hospital; Glostrup Hospital; Gentofte Hospital; Hillerød Hospital; Roskilde Hospital; Århus University Hospital, Århus; Århus University Hospital, Skejby.
- 3 1) Ability to understand and provide written informed consent to participate in this trial,  
**or**  
2) Ability to understand and provide oral informed consent in presence of at least one impartial witness who should sign and personally date the consent form  
**or**  
3) The subjects legally acceptable representative can understand and provide written informed consent if the subject is not capable of this because of the present mental or physical condition of the subject.

#### Exclusion:

A subject will **NOT** be eligible for inclusion in this trial if any of the following criteria apply:

1. Subjects with known hyper-bilirubinaemia ( $>0.4$  mg/ ml) or hypertriglyceridaemia ( $>10$  g/l) since this can interfere with measurements. If subjects with unknown status on these points are included and have PCT measurements, the measuring-equipment will detect these conditions.
2. Subjects suffering from a blood disorder, where daily sampling of 7 ml of blood for maximally 28 days (210 ml distributed on 28 days) will be an inconvenience or a potential risk, which could compromise the safety of the subject.
3. Subjects who are pregnant or breast feeding

1  
2  
3  
4  
5  
6  
7 The *a priori* probability of surviving with the normal recommended diagnostics and treatment  
8 with the presently available means to detect infections and on the other hand the normal  
9 diagnostics and treatment together with daily Procalcitonin measurements and prompt clinical  
10 reaction should be equal.  
11  
12

13  
14  
15 **Randomisation:**

16  
17 Two arms (1:1), n = 500 per arm:

18  
19 Arm 1: Normal recommended diagnostics and treatment of infections in the intensive  
20 care unit (standard of care)  
21

22  
23 Arm 2: Normal recommended diagnostics and treatment of infections in the intensive  
24 care unit (standard of care) **and** Procalcitonin guided diagnostics and treatment of  
25 infection  
26  
27

28  
29 **Primary Trial Objective:** To address whether daily Procalcitonin measurements and immediate  
30 diagnostic and therapeutic response on abnormal values and day-to-day changes can reduce  
31 the mortality of critically ill patients in the ICU.  
32

33  
34 **Trial registration days:** Intensive Care Unit admission day, running routine registration of  
35 examinations and blood tests, day of discharge or death, day 28 after admission, day 60, 90,  
36 120 and 180 after discharge.  
37

38  
39 **Data collection:** The data collection will be simple and performed real time via fax.  
40  
41  
42  
43  
44  
45  
46  
47  
48  
49  
50  
51  
52  
53  
54  
55  
56  
57  
58  
59  
60

# 1 TRIAL BACKGROUND AND RATIONALE

## 1.1 Background

### 1.1.1 Sepsis and mortality in the Intensive Care Unit

Sepsis remains a major cause of mortality in critically ill patients admitted to the Intensive Care Unit (ICU)<sup>1-2</sup>. All-cause mortality during ICU admission ranges from 12.1% in non-infected patients to 43.9% in infected patients<sup>3</sup>. Patients who are discharged to other departments and later to their own home or an institution for rehabilitation, continue to have a high mortality (additionally 10-20%) for 20-30 days after ICU discharge<sup>4-7</sup>. Different explanations for this have been proposed. Among the most important are:

- 1) During ICU admission it becomes clear that further treatment lacks perspective for the patient (often chronic organ diseases and cancer diseases) and the patient is therefore discharged to the relevant department when discharge from the ICU is possible.
- 2) After discharge from the ICU the physical condition of the patient deteriorates because of a severe disease with a dismal prognosis and it is decided together with the patient and relatives that the patient should not be admitted to the ICU again.
- 3) Critically ill patients often have an immunological incompetence and therefore these patients are susceptible to serious infections. Additionally these infections often have an atypical course and thereby a delayed diagnosis. This immunological incompetence prevails some time after discharge from the ICU why the patient remains susceptible to infections for this period of time. There is a grave risk that these serious infections with an atypical course can be diagnosed late in the course and cause an increased risk of mortality for critically ill patients.

### 1.1.2 Procalcitonin and bacterial infections

In 1993 Assicot et al. reported that a high level of serum-Procalcitonin (PCT) was closely related to bacterial infection and seemingly correlated to the severity of the infection<sup>8</sup>. This finding has since been ascertained in many studies demonstrating high levels (2.0 ng/ml-50.0 ng/ml (-1500 ng/ml)) of PCT in patients with systemic bacterial infection, while low levels have consistently been found in patients with localised bacterial infections and viral infections<sup>9-16</sup>. Others have shown low PCT levels (and seldom up till maximally 3.0 ng/ml) in non-infected patients following surgery, trauma and myocardial infarction<sup>10, 17-21</sup>. Sensitivity and specificity for sepsis when PCT levels are above 5.0 ng/ml have been estimated to 80-90% and 85-100%, respectively, in the largest of these studies.

The PCT level starts decreasing within 24 h after surgery, trauma and myocardial infarction in non-infected patients in contrast to the C-reactive protein, which has a peak level 36-72 h after these events<sup>10-17-21</sup>.

Consequently, bacterial infection is suspected if PCT is increasing 24 h after surgery, trauma or myocardial infarction.

### 1.1.3 Procalcitonin kinetics, biochemistry and cellular biology

PCT is a 13 kDa, 116 amino acid polypeptide, initially described as a pro-hormone of Calcitonin, a

hormone in the calcium metabolism, which is produced in the medullary C-cells in the thyroid gland<sup>22-24</sup>.

Recent studies have shown that the PCT variant, which is related to infection is produced in other tissues (liver, kidney, muscle, fat)<sup>25-27</sup>

Kinetic studies with healthy humans and baboons have shown a rapid release of PCT within 2-6 hours after injection of bacteria or bacterial endotoxin. This time to release is significantly shorter than that of C-reactive protein (8-24 h). The plasma half life of PCT is approximately 24 h. PCT measurements in healthy, uninfected volunteers has been shown very low levels (<0.05 ng/ml)<sup>10,28-29</sup>.

#### 1.1.4 Procalcitonin-guided treatment and reduction in the use of antimicrobial agents

A recent study has demonstrated a reduced use of antimicrobial agents in patients with lower respiratory tract symptoms, when the treatment was guided by the initial PCT level<sup>30</sup>.

#### 1.1.5 Procalcitonin and risk of mortality

We have shown that a PCT increase after reaching a level of 1.0 ng/ml is an independent predictor of mortality in critically ill patients. Patients who did not reach a PCT level above 1.0 ng/ml had an all cause mortality risk of 4.7% while admitted in the ICU, compared to an all cause mortality of 19.1% for the whole population of ICU patients. Patients who reached a PCT value above 1.0 ng/ml who had a decreasing PCT the next day had a mortality risk of 18.9%, but patients who had an increasing PCT level after reaching 1.0 ng/ml had a mortality risk of 32.7%. This increase in mortality risk was significant for the entire follow-up period of 90 days<sup>31</sup>.

The mortality risk increased for every day the PCT increased. Taking in mind the close relation between PCT levels and bacterial infection, a large part of this mortality increase is (when PCT is increasing), to the best of the existing knowledge, attributable to uncontrolled bacterial infections. This is supported by the findings of the European Sepsis Group<sup>3</sup>.

The rapid release of PCT to the blood stream (2-6 h), when infection is progressing, makes acute detection of ongoing serious infection possible, hereby potentially reducing mortality in critically ill patients if treatment is guided acutely by PCT measurements.

## 1.2 Rationale - summary

Sepsis and complications to sepsis are major causes of mortality in critically ill patients<sup>1-2</sup>. Rapid treatment of sepsis is of crucial importance for survival of patients. In the ICU, the infectious status of the patient is often difficult to assess because symptoms cannot be expressed (unconscious or sedated patients) and signs may present atypically because of immunologic incompetence and masking by the drugs given and thermo-influencing-therapy, i.e. dialysis. Biological and biochemical markers of inflammation (WBC, C-reactive protein) may often be influenced by other parameters than infection, such as: trauma, surgery, other types of inflammation such as rheumatoid diseases (C-reactive protein) and gluco-corticosteroid treatment (WBC), and may be unacceptably slowly released after progression of an infection<sup>32-33</sup>. At the same time, lack of a relevant antimicrobial therapy in an early course of infection may be fatal for the patient.

1  
2  
3 For these reasons, in the clinical setting, it is often necessary to initiate or adjust antimicrobial  
4 therapy on an unsure ground and the relevant therapy may in some situations be delayed for  
5 important hours or even days. Specific and rapid markers of bacterial infection have been  
6 sought for use in the ICU. Mortality in critically ill patients increases gravely when Procalcitonin  
7 levels increase from day to day<sup>31</sup>. Low PCT levels have been shown to effectively rule out  
8 sepsis<sup>12</sup>.

9  
10  
11  
12  
13  
14 However, no randomised controlled trials have been conducted to show if mortality in critically ill  
15 patients can be reduced by using a strategy of daily standardised Procalcitonin measurements  
16 as an early detector of serious bacterial infection. Therefore evidence is presently not sufficient  
17 to introduce daily consecutive Procalcitonin measurements to guide the diagnostic and  
18 therapeutic management of patients admitted to the ICU .  
19  
20  
21

22  
23 The rationale for this trial is to assess the ability of daily Procalcitonin measurements to reduce  
24 the mortality of critically ill patients.  
25  
26

### 27 28 **1.3 Procalcitonin analysing methods**

29 There are four commercially available analysing methods for measuring blood levels of Procalcitonin, one  
30 semi-quantitative and three quantitative. Two of these are described below, the oldest and most used  
31 test, LUMITEST® BRAHMS /BRAHMS PCT LIA, and a newer fully automated test with a higher  
32 sensitivity, KRYPTOR® PCT BRAHMS. KRYPTOR® PCT BRAHMS will be used for all Procalcitonin  
33 analyses in this study<sup>34</sup>.  
34  
35  
36

#### 37 38 **1.3.1 LUMITEST® BRAHMS /BRAHMS PCT LIA**

39 The oldest and so far most used quantitative test is LUMITEST® BRAHMS /BRAHMS PCT LIA.  
40 Analysis is made by a "sandwich" luminiscens immuno-assay with an anti-catacalcin coated tube:  
41 Anti-**Catacalcin** binds catacalcin in the patient sample and is hereby immobilised (catacalcin  
42 could otherwise interfere with the analysis).  
43  
44

45 Anti-**Calcitonin** antibody is marked with a luminescent *acridin*-derivative.

46 H<sub>2</sub>O<sub>2</sub> and NaOH are added and these react with the *acridin*-derivative which leads to the  
47 formation of *acridon* and this process is accompanied by transmission of light. The quantity of this  
48 light is proportional to the Procalcitonin concentration in the sample.  
49

50 We have found a coefficient of variation (CV) in the measuring interval between 0.1 ng/ml-1.0  
51 ng/ml of 0.09-0.83 for this test. At PCT levels above 1.0 ng/ml, we found CV's of 0.008-0.065  
52 (range)<sup>37</sup>.  
53  
54

55 The manufacturer claims a *functional assay sensitivity* (CV<0.2) of 0.3 ng/ml.  
56  
57

#### 58 59 **1.3.2 KRYPTOR® PCT BRAHMS**

60 A new, and according to the manufacturer, more precise assay is the fully automated  
KRYPTOR® PCT BRAHMS. Procalcitonin is analysed using the analysing machine KRYPTOR®  
and fluids and utensils from the company BRAHMS diagnostica, Berlin. KRYPTOR® uses



TRACE technology (Time Resolved Amplified Cryptate Emission), which is a non-radiating transmission of energy. The transmission happens between two fluorescent compounds: Europium Cryptate (donor) and XL665 (acceptor). While the antigen-antibody complex is formed, a signal is measured.

The functional assay sensitivity (CV < 0.2) is according to the manufacturer 0.06 ng/ml for the KRYPTOR® test. In the relevant clinical interval (which has not quite been defined yet) the CV is 0.02-0.03 (product information).

- Studies concerning Procalcitonin have so far mainly been using LUMITEST® BRAHMS /BRAHMS PCT LIA.

#### 1.4 Rationale for a 24 h interval between blood sampling

Several studies have shown a half-life of Procalcitonin of 20-30 hours and Procalcitonin levels increase 2-6 h after bacterial products are presented in the blood stream<sup>10,28-29, 35</sup>. An important exception to this is patients suffering from severe uraemia, where the Procalcitonin half-life is prolonged, but it has been demonstrated, that Procalcitonin is removed by dialysis<sup>35</sup>. Studies concerning Procalcitonin and surgery have shown, that the Procalcitonin blood level is on a decreasing curve 24 h after major thoracic and abdominal surgery, except in infected patients<sup>17-21</sup>. In conclusion, a Procalcitonin level which is increasing 24 h after a therapy shift or after surgery suggests progression of infection.

#### 1.5 Procalcitonin and immuno-compromised patients

Markers and mediators of inflammation and infection are often dependent on a functioning immune system, which is able to produce the substance measured, e.g. WBC, TNF, different interleukins<sup>10,15,16, 36</sup>. It has been established that Procalcitonin is not dependent on blood cells and their mediators, and Procalcitonin is mainly produced by tissues like liver, kidney, muscle and fat<sup>25-28</sup>. In concordance with this, studies investigating Procalcitonin in neutropenic patients have found results comparable to those for immuno-competent patients<sup>36-41</sup>. A few studies regarding neutropenic patients that compared PCT levels to positive blood cultures have found a low sensitivity of the test for bacteriemia, but these studies lack clear definitions of virulence of different micro-organisms (e.g. Coagulase negative staphylococci vs. Gram negative rods) in their study designs<sup>40</sup>.

#### 1.6 Studies on Procalcitonin biology and bacterial infection

##### 1.6.1 In vitro and animal studies

In vitro studies have shown Procalcitonin to be an inducer of albumin synthesis in rat liver tissue measured on mRNA and protein synthesis. This was found to be opposite to TNF $\alpha$  and IL-6, these substances lowering albumin synthesis<sup>42</sup>. In a study of sepsis in baboons, low PCT was

found in non-infected subjects and high PCT in infected subjects, and PCT blood levels started increasing after 2 hours<sup>10</sup>. In another baboon model Procalcitonin incompetence was shown in an anhepatic subject<sup>28</sup>.

In a study of burn wound and *Pseudomonas aeruginosa* septicaemia in rats, a high correlation between endotoxin levels and PCT in blood was found<sup>43</sup>.

### 1.6.2 Human observational studies

Most of the present knowledge on Procalcitonin has been established by observational studies. Key-references are mentioned in paragraph 1.1 and 1.2

### 1.6.3 Clinical trials

Only few Randomized Controlled Trials regarding PCT-guided treatment have so far been published, one of special interest has used PCT-guided treatment (n=119+124) and has assessed the ability of this clinical strategy to reduce use of antimicrobial therapy in patients with suspected lower respiratory tract infection. A Relative Risk of 0.49 [95% CI 0.44-0.55] for antibiotic exposure was demonstrated, without any significant difference in culture growth from patient samples, quality of life, mortality, inflammatory parameters (temperature, C-reactive protein, WBC), number of days admitted and need for stay in intensive care unit. The study was designed to detect a 30 % difference with 95% stringency. However some of the mentioned endpoints do not occur in all patients, and in these cases (mortality, need for stay in ICU) it may be false to conclude, that there is no difference between groups within the chosen 30 % limit<sup>30</sup>. A very small study (n=12+13=25) has tried to investigate empiric prophylaxis with fluor-quinolone Ofloxacin in patients with abdominal aortic aneurism. However the sample size of this study does not justify any conclusions on this issue<sup>44</sup>.

## 2 TRIAL OBJECTIVES AND ENDPOINTS

### 2.1 Trial Objectives

### 2.2 Primary Objectives

To address whether immediate diagnostic and therapeutic initiatives guided by abnormal high and increasing values of Procalcitonin measured daily can reduce the mortality of critically ill patients in the ICU.

### 2.3 Secondary Objectives

1. To determine mortality of ICU patients at discharge from the ICU, at day 60,90, 120 and 180.



2. To determine differences in prescription of antimicrobial therapy in the two arms.
3. To determine the frequency of patients with complications to infection in the two arms, defined as; sepsis, severe sepsis, septic shock, disseminated intravascular coagulation, multi-organ dysfunction syndrome (MODS), coma (Glasgow Coma Scale), hypotension, respiratory insufficiency (ventilator treatment need), liver insufficiency, acute uremia (three times increase in baseline creatinine).
4. APACHE II score
5. Accumulated PCT increases over time
6. To determine the number of diagnostic image procedures per day after enrolment in the trial in the two arms
7. To determine the number of non-routine microbiological samples taken per day after enrolment in the trial in the two arms
8. To determine the number of surgical procedures per day after enrolment in the trial in the two arms
9. To determine the time to the first change in antimicrobial chemotherapy after admittance to the ICU in the two arms

## 2.4 Trial Endpoint(s)

### **Primary:**

Mortality at day 28 after admission to the ICU.

### **Secondary:**

1. Mortality while admitted to the ICU, Mortality at day 60, 90 and 180 after admission to the ICU
2. Defined day doses of antimicrobial therapy in each arm
3. Occurrence of sepsis, severe sepsis, septic shock, DIC. Assessment of Glasgow Coma Scale, measurement of Blood Pressure (systolic blood pressure < 90), days with artificial ventilation, Factor 2-7-9 < 0.7, creatinine (increase factor 3 from baseline), MODS.
4. SOFA score daily (Temperature, Mean Arterial Pressure, Heart Rate, Respiratory Rate, FIO<sub>2</sub>, HCO<sub>3</sub><sup>-</sup>, pH (arterial), Se- Na<sup>+</sup>, K<sup>+</sup>, Creatinine, Haematocrite, White Blood Count+ differential count, Glasgow Coma Scale).

5.  $AUC_{\text{Procalcitonin}}$  for the Procalcitonin-measuring group and for the control group.
6. Number of diagnostic images after admission to the ICU.
7. Number of non-routine microbiological sample taken after admittance to the ICU.
8. Number of surgical procedures during the trial
9. Time to the first change in antimicrobial chemotherapy after admittance to the ICU

### 3 INVESTIGATIONAL PLAN

#### 3.1 Trial Design

##### 3.1.1 Intervention

This is a randomised, single-blinded multicentre trial.

Approximately 1000 subjects admitted to an ICU in the participating University hospitals will be included. All patients included will receive the the standard recommended diagnostic and therapeutic procedures mandated at the particular ICU. Additionally, the patients will be randomised for:

1. No PCT guided diagnostics and treatment (i.e. the standard-of-care / **control arm**).

Or

2. Daily PCT measurements and protocol-specified additional diagnostic and/or therapeutic interventions guided by the PCT levels observed. High or increasing PCT levels will mandate such interventions (see section 3.3.1 for details of interventions)(the **PCT intervention arm**)

##### 3.1.2 Randomisation

The randomisation is performed by the PASS study centre and is stratified according to site, age and initial Acute Physiology And Chronic Health Evaluation II (APACHE II) score. For patients randomised to the PCT intervention arm, daily PCT levels are communicated to the team responsible for the clinical management together with a recommendation of what interventions the investigator team is expected to initiate based on the PCT measurement. In

1  
2  
3 the control arm, blood samples for PCT will be analysed simultaneously with samples from the  
4 PCT intervention arm, but results of these PCT analyses will remain blinded for the investigators  
5 until the study has been completed. The PCT measurements will be conducted daily as long as  
6 the patient is admitted to the ICU, but maximally 28 days from time of enrolment in this study.  
7  
8 While patients remain in the hospital, and after discharge from the ICU, samples will be  
9 collected for PCT determination but the samples will not be analysed real-time and hence the  
10 results will not be used to guide interventions outside the ICU, except if requested by the ICU  
11 investigator in conjunction with the discharge of the patient. Patients transferred from one ICU  
12 to another ICU, will remain in the trial provided that the receiving ICU also participates in this  
13 trial.  
14  
15  
16  
17  
18  
19  
20  
21  
22

## 23 3.2 Trial Population

### 24 3.2.1 Inclusion Criteria

25  
26  
27 A subject will be eligible for inclusion in this trial only if all of the following criteria apply:  
28  
29

- 30  
31 1 Male or female, aged  $\geq 18$  years of age.  
32  
33 2 Admitted to the participating intensive care units. Patients should be included within 24  
34 h. If a patient has not been included at this time, this patient cannot be included in the  
35 present admittance.  
36  
37 3 Subjects should in the investigator's opinion be likely to be admitted to the ICU for more  
38 than 24 h. Subjects should not be likely (<10%) to die or be discharged in this period of  
39 time  
40  
41  
42  
43  
44  
45 4 Ability to understand and provide written informed consent to participate in this trial,  
46  
47  
48 **or**  
49  
50 Ability to understand and provide oral informed consent in presence of at least one  
51 impartial witness who should sign and personally date the consent form  
52  
53  
54  
55 **or**  
56  
57 The subjects legally acceptable representative can understand and provide written  
58 informed consent if the subject is not capable of this because of the present mental or  
59 physical condition of the subject.  
60

### 3.2.2 Exclusion Criteria

A subject will **NOT** be eligible for inclusion in this trial if any of the following criteria apply:

4. Subjects with known hyper-bilirubinaemia (>0.4 mg/ ml) or hypertriglyceridaemia (>10 g/l) since this can interfere with measurements. If subjects with unknown status on these points are included and have PCT measurements, the measuring-equipment will detect these conditions.
5. Subjects suffering from a blood disorder, where daily sampling of 7 ml of blood for maximally 28 days (210 ml distributed on 28 days) will be an inconvenience or a potential risk, which could compromise the safety of the subject.

### 3.3 Treatment During Trial

The aim of the PCT guided treatment is to reduce time to relevant treatment of a serious infection and thereby to reduce the mortality. All subjects will receive the standard-of-care evaluations and therapeutic interventions recommended in the ICU at which the patient is admitted to. Subjects in the PCT measurement group will additionally receive expanded diagnostics and treatment should the PCT levels be found to high and/or increasing (see section 3.3.1 for definitions).

Access to results of PCT measurements of any kind (semi-quantitative or quantitative) at any time in the study period is not allowed for patients randomised to the control arm.

The PASS study group in collaboration with the PASS Steering Committee, will issue guidelines for the composition of the interventions that a high or increasing PCT level would mandate. Some variation between sites is acceptable, whereas all patients within a given ICU should follow that ICU's guidelines. The guidelines will be updated when new information becomes available. In the guidelines, there may be several alternatives indicated for a given situation. The investigator is not mandated to follow the guidelines.

#### 3.3.1 Procalcitonin levels and diagnostic and therapeutic consequences

The situation mandating additional interventions in the the PCT intervention arm is based on the following criteria:

- PCT levels  $\geq$  1.00 ng/ml

and

- The PCT level increases one day to the next or has an irrelevant decrease of < 10%

The daily assessment of PCT guided interventions will be as follows:

- Subjects with PCT levels  $\geq 1.00$  ng/ml based on the first determination after enrolment into the study will follow the principles for interventions as detailed below.
- Subjects with PCT levels  $\geq 1.00$  ng/ml and with a day (n) to day (n+1) PCT increase or a decrease of < 10% (irrelevant decrease) will follow the principles for interventions as detailed below.
  - Microbiology: blood cultures, airway cultures, urine cultures and samples from any other suspected foci.
  - Considerations of whether to perform diagnostic imaging: one or more of the following: Chest X-ray, Ultra-sonic examination of suspected focus, Computerised Tomography of relevant areas, Magnetic Resonance imaging of relevant areas, other imaging techniques.
  - Surgical drainage of possible un-drained foci
  - Antimicrobial therapy expansion. Treatment will be guided by any relevant findings: microbial or diagnostic imaging, or other findings. If focus and micro organism of infection is not clear steps will be:
    - 1) Empirical sepsis treatment
    - 2) Empirical sepsis treatment with anaerobic and gram positive coverage
    - 3) Empirical sepsis treatment with anaerobic and gram positive coverage and/ or fungal treatment
- Subjects with PCT levels < 1.00 ng/ml will continue to receive standard-of-care
- Subjects with PCT levels  $\geq 1.00$  ng/ml and with a day-to-day PCT decrease of  $\geq 10\%$  will continue to receive standard-of-care.

Precise guidelines for this (antimicrobial) treatment will be made specifically for every ICU in concordance with the local choices regarding antimicrobial agents. For PCT guided diagnostics and treatment algorithm, see Diagram 1:

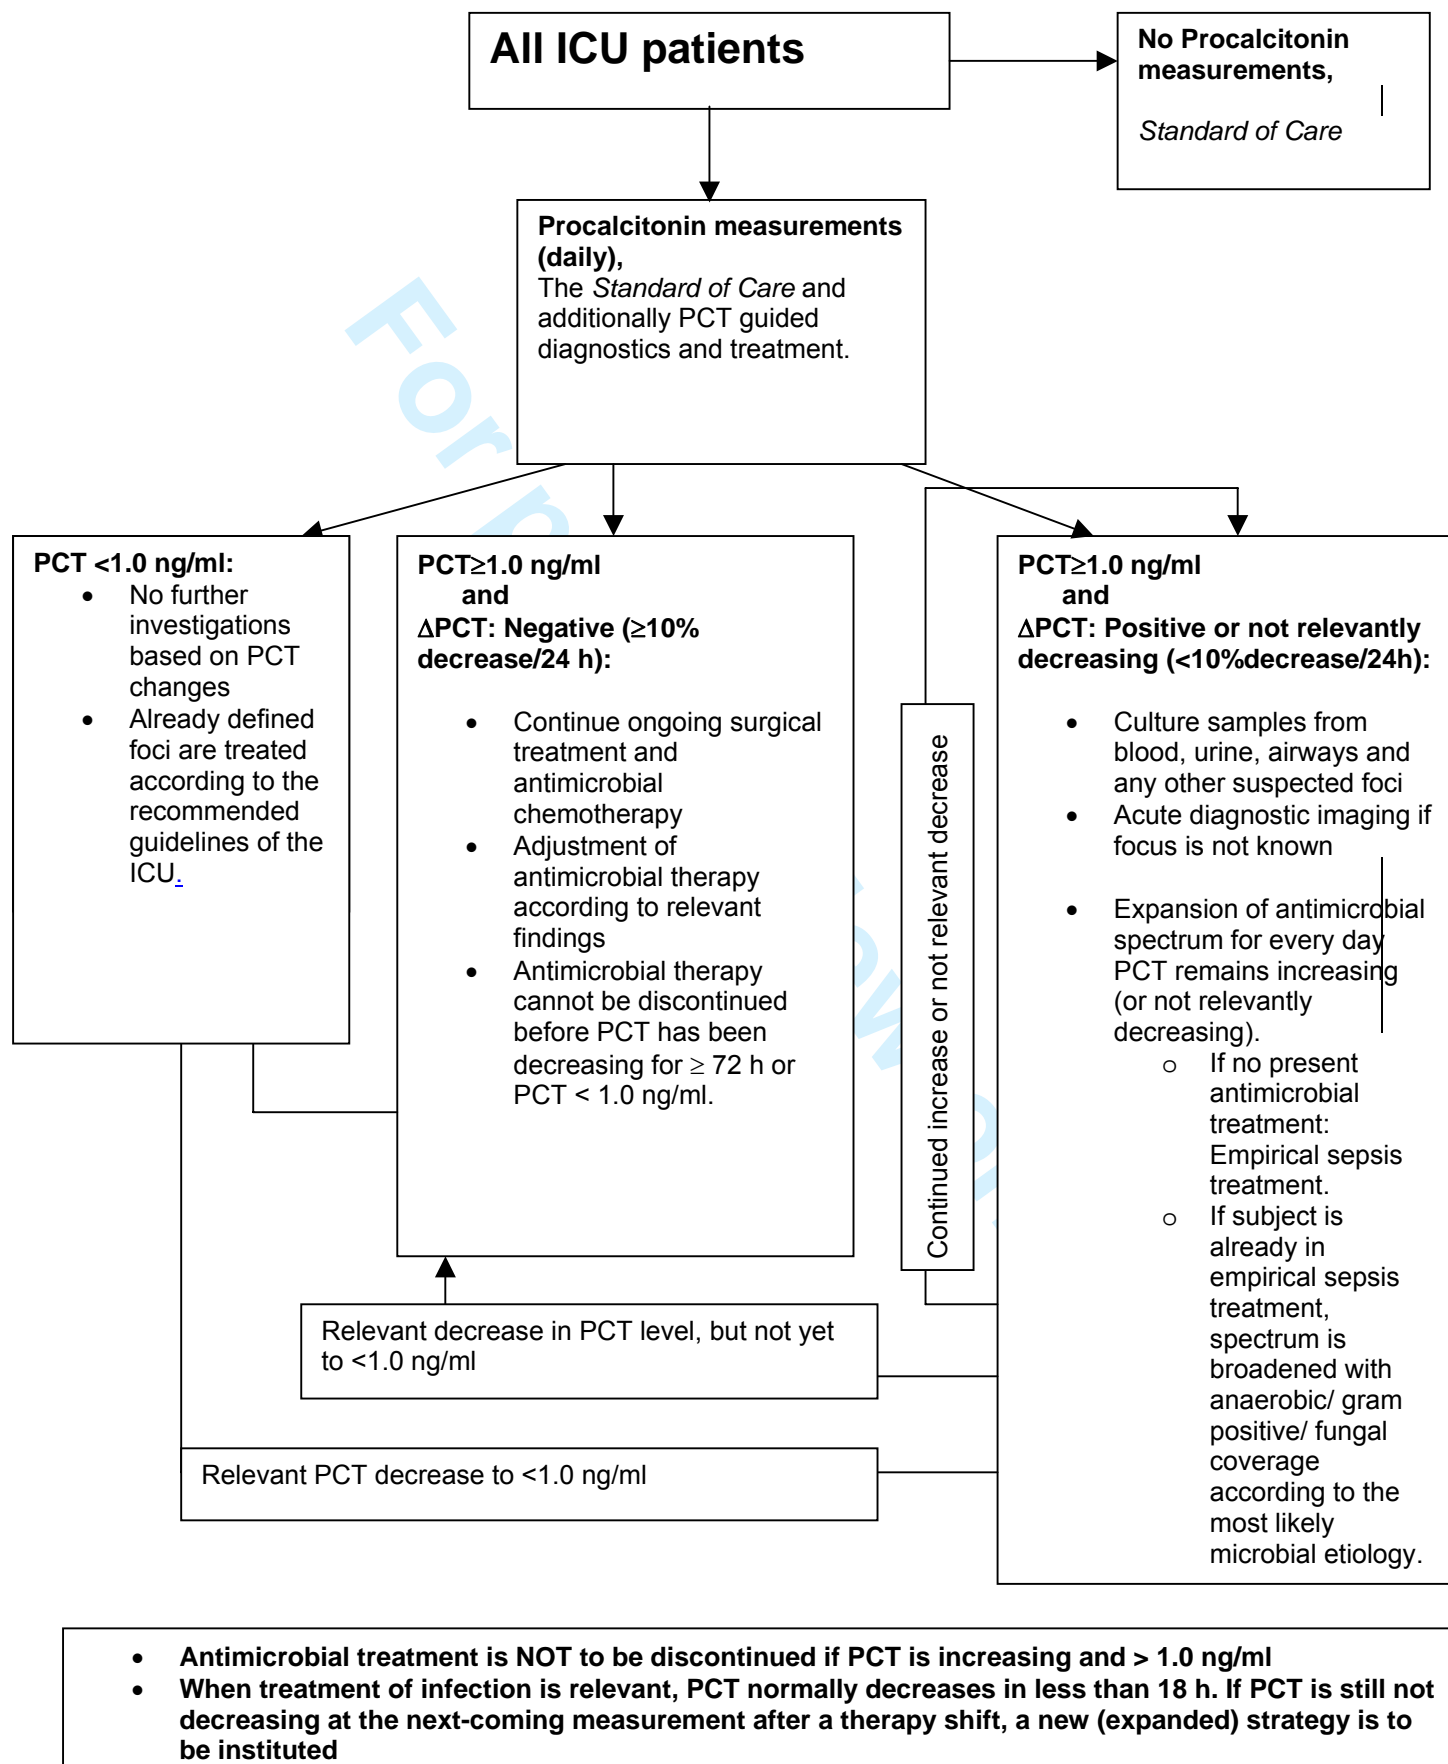

### 3.3.2 Change of PCT-guidance strategy during the trial

#### 3.3.2.1 Randomised PCT-guided interventions

Subjects may **discontinue** the interventions initiated on the basis of PCT measurements only in case the benefit: risk ratio for these interventions is not acceptable to the treating physician. The specific concern will be collected.

#### 3.3.2.2 The non-PCT guided interventions

The recommended interventions based on other information than PCT measurements should always be instituted and continued when relevant from a clinical judgement.

#### 3.3.3 Antimicrobial Drugs and Dosages

All antimicrobial drugs prescribed on basis of an increasing PCT must be prescribed by the investigator or an intensive care physician, who has been sufficiently instructed in all aspects of the trial. The investigator must check for possible drug-drug interactions between any of the drugs prescribed guided by PCT changes and other agents that may be metabolised via the same enzyme systems or organs. To assist the investigator, information on this topic is included in the Manual of Operational Procedures. Also, the product label of each drug prescribed should be reviewed.

General principles that will be followed regarding antimicrobial therapy of sepsis are:

- Antimicrobial agents are prescribed, when possible, according to the resistance pattern of the causative microorganism.
- When the causative microorganism is not known, antimicrobial agents are prescribed according to knowledge of which microorganisms normally and possibly infect the suspected focus.
- When neither the microorganism nor the focus of infection is known, one or more broad spectrum antimicrobial agents are selected. If the effect is not sufficient, the spectrum of the used antimicrobial agents is additionally expanded, often with anaerobic active agents, gram positive active agents and antifungal agents. Conversely, if the effect is sufficient, the spectrum of used antimicrobial agents is narrowed according to knowledge of focus and causative microorganism.
- In empiric sepsis treatment, a combination of a  $\beta$ -lactam/ Carbapenem + a fluor-quinolone is chosen if not contra indicated in the specific subject. This treatment can be

1  
2  
3 supplemented with nitroimidazoles, glycopeptides, oxazolidinones and azoles. More  
4 specific treatment regimes are initiated and guided by findings regarding the causative  
5 microorganism and/or focus of infection.  
6  
7

8  
9 Dosages of antibiotics are decided according to the recommendations of the specific  
10 ICU.  
11

12  
13 The toxicity management guidelines detailed below refer to all components of the antimicrobial  
14 treatment used in the trial.  
15  
16

### 17 18 19 **3.3.3.1 Overdose and Toxicity**

20 Antimicrobial agents may be interrupted because of the development of adverse events (AEs,  
21 see section 6.1 for definitions) at the discretion of the investigator and according to the severity  
22 of the AE. The dose of all antimicrobial drugs may be reduced, interrupted or reintroduced  
23 according to standard practice at the time, and depending on the severity of the AE.  
24  
25  
26

27  
28 Subjects who require a dose modification should be re-evaluated on a daily basis.  
29

30  
31 The investigator is responsible for taking appropriate precautions to ensure that the risk of  
32 developing toxicity is minimised, that the subject is monitored for the development of toxicity,  
33 and if such toxicities do occur, take appropriate action to minimise their effects.  
34  
35  
36  
37  
38  
39  
40  
41  
42  
43  
44  
45  
46  
47  
48  
49  
50  
51  
52  
53  
54  
55  
56  
57  
58  
59  
60



## 4 MEASUREMENTS AND EVALUATION

### 4.1 Time and Events Schedule

A flow chart showing the timing of trial procedures (Clinical and Laboratory) is shown in Table 1.

An initial pre-entry (screening) assessment for eligibility will be performed as soon as possible after the patient is admitted to the ICU. The patient should be randomised no later than 24 hours after the time of admission. Evaluations will then be carried out at entry (Day 1), and thereafter daily as long as the patients remains in the ICU. After discharge, the course of disease is collected in less detail and the survival status determined day 28, 60, 90 and 180 after enrolment in the trial.

#### 4.1.1 Pre-entry Evaluations

The site must obtain subject consent in the form of a written informed consent form prior to the initiation of **any** pre-entry procedures as outlined in this protocol. The consent form must be approved by the IEC of each participating site.

The pre-entry evaluation will be conducted the first day of the trial by an investigator in the ICU and will include an evaluation of whether the patient fulfils the requirements for enrolment in this trial (see section 3.2.2 and 3.2.3).

Subjects who fail to meet the entry criteria may not be re-screened for this protocol until 28 days after the failed pre-entry evaluation. Hence, enrolment of such patients will require that the patient is re-admitted to the ICU after at least 7 days outside of the ICU after the time of the first screening.

#### 4.1.2 Baseline (Day 1) Evaluations

The following evaluations should be performed at baseline (Day 1):

Note: For this trial, Baseline (Day 1) is defined as the day on which the subject has his/her first blood sample for PCT measurement. The following data are to be collected on day 1:

- Demography including date of birth, weight, height, and indication for admittance to the ICU
- Infections found in the subject in this hospital admission prior to admittance to the ICU.
- Present infection focus/ etiologic microorganism

- 1  
2  
3  
4  
5  
6  
7  
8  
9  
10  
11  
12  
13  
14  
15  
16  
17  
18  
19  
20  
21  
22  
23  
24  
25  
26  
27  
28  
29  
30  
31  
32  
33  
34  
35  
36  
37  
38  
39  
40  
41  
42  
43  
44  
45  
46  
47  
48  
49  
50  
51  
52  
53  
54  
55  
56  
57  
58  
59  
60
- APACHE II score (Temperature, Mean Arterial Pressure, Heart Rate, Respiratory Rate, FIO<sub>2</sub>, HCO<sub>3</sub><sup>-</sup>, pH (arterial), Se- Na<sup>+</sup>, K<sup>+</sup>, Creatinine, Haematocrite, White Blood Count+ differential count, Glasgow Coma Scale)
  - Current medical conditions
  - Pre-admittance daily function and health state:
 

|                      |                                                                                                                                                                                                                                                                                                              |
|----------------------|--------------------------------------------------------------------------------------------------------------------------------------------------------------------------------------------------------------------------------------------------------------------------------------------------------------|
| Professional career: | 1) Student, 2) Part time work, 3) Full time work,<br>4) Early retirement, 5) Retired                                                                                                                                                                                                                         |
| Health:              | 1) Congenital handicapped, 2) Acquired handicap,<br>3) Chronic disabling disease, 4) Chronic non-<br>disabling disease, 5) Healthy                                                                                                                                                                           |
| Self-supportance:    | 1) Lives in nursing home, 2) Lives in a flat<br>connected to a nursing home, 3) Own home with<br>external help ≥ once / day, 4) Own home with<br>external help < once daily, 5) Own home, no help<br>required                                                                                                |
| Hospital need:       | 1) ≥ 3 months admitted to a hospital/ last year, 2) 1-<br>3 months admitted to a hospital/ last year 3) 1-30<br>days admitted/ last year, 4) No admissions,<br>ambulatory visits ≥ 6/ last year, 5) No admissions,<br>ambulatory visits 1-5/ last year, 6) No admissions,<br>No ambulatory visits/ last year |
  - Adverse events/ other complications to treatment given in this hospital admission (ongoing clinical conditions at Day 1 shall be recorded in the “Adverse Event and Medical Condition Form” of the CRF at this time, regardless of the fact that such conditions may not subsequently be found to fulfil the definitions for an adverse event (see section 6.1))
  - Haematology: *haemoglobin, platelet count (WBC count mentioned as part of APACHE II)*
  - Clinical chemistry: Albumin, Bilirubin, Factor 2-7-9, Alanin Amino Transferase (ALAT)/ Aspartate Amino Transferase (ASAT), Alcaline Phosphatase, Creatinine, Carbamide, Na<sup>+</sup>, K<sup>+</sup>, Phosphate, Ca<sup>2+</sup>, C-reactive protein (some are also mentioned as part of APACHE II).

- Baseline PCT

The daily PCT determination is done real-time at the Department of Clinical Biochemical Department, Hvidovre Hospital, using the EC-approved measuring instruments and reagents. For each subject, the same methodology should be used throughout the trial period. The KRYPTOR® PCT BRAHMS sensitive assay is the accepted standard assay. Other licensed assays may be used instead if judged by the PASS steering committee to have a comparable performance compared to the indicated assay.

#### 4.2 On Trial Evaluations

On trial assessments will be completed at the following time-points unless otherwise specified:

While admitted to the ICU, the following information will be registered unless specified otherwise:

##### **Daily while patient is admitted to the ICU:**

- Clinical signs of new (nosocomial) infections
- Microbiological or radiological evidence of new (nosocomial) infection
- Defined Day Doses of antimicrobial chemotherapy
- APACHE II score (Temperature, Mean Arterial Pressure, Heart Rate, Respiratory Rate, FIO<sub>2</sub>, HCO<sub>3</sub><sup>-</sup>, pH (arterial), Se- Na<sup>+</sup>, K<sup>+</sup>, Creatinine, Haematocrite, White Blood Count+ differential count, Glasgow Coma Scale)
- Occurrence of sepsis, severe sepsis, septic shock, DIC. Assessment of Glasgow Coma Scale, measurement of Blood Pressure (systolic blood pressure < 90), days with artificial ventilation, Factor 2-7-9 < 0.7, creatinine (increase factor 3 from baseline), MODS.
- Adverse events/ other complications to treatment given in the ICU (ongoing clinical conditions at Day 1 shall be recorded in the “Adverse Event and Medical Condition Form” of the CRF at this time, regardless of the fact that such conditions may not subsequently be found to fulfil the definitions for an adverse event (see section 6.1))
- Haematology: haemoglobin, platelet count WBC (WBC count also mentioned as part of APACHE II)
- Clinical chemistry: Albumin, Bilirubin, Factor 2-7-9, Alanin Amino Transferase (ALAT)/ Aspartate Amino Transferase (ASAT), Alkaline Phosphatase, Creatinine, Carbamide, Na<sup>+</sup>, K<sup>+</sup>, Phosphate, Ca<sup>2+</sup>, C-reactive protein (some are also mentioned as part of APACHE II).

- Blood sample for PCT determination
- Diagnostic imaging procedures performed
- Non-routine microbiological sample taken
- Surgical procedures performed
- Change in antimicrobial chemotherapy

**At the day of discharge from ICU or day of death or later:**

- Mortality and time of death, and the cause hereof
- AUC<sub>Procalcitonin</sub> (at discharge from the ICU) (will remain blinded in the control arm)
- Discharge and post-discharge daily function and health state (obtained on day 30 and 180):

Professional career: 1) Student, 2) Part time work, 3) Full time work,  
4) Early retirement, 5) Retired

Health: 1) Congenital handicapped, 2) Acquired handicap,  
3) Chronic disabling disease, 4) Chronic non-  
disabling disease, 5) Healthy

Self-supportance: 1) Lives in nursing home, 2) Lives in a flat  
connected to a nursing home, 3) Own home with  
external help  $\geq$  once / day, 4) Own home with  
external help  $<$  once daily, 5) Own home, no help  
required.

Hospital need: 1)  $\geq$  3 months admitted to a hospital/ last year, 2) 1-  
3 months admitted to a hospital/ last year 3) 1-30  
days admitted/ last year, 4) No admissions,  
ambulatory visits  $\geq$  6/ last year, 5) No admissions,  
ambulatory visits 1-5/ last year, 6) No admissions,  
No ambulatory visits/ last year

**After discharge from ICU while patient is still admitted to hospital**

- Clinical signs of new (nosocomial) infections

- Microbiological or radiological evidence of new (nosocomial) infection
- Defined Day Doses of antimicrobial chemotherapy
- Current medical conditions (including acute organ failures)
- Diagnostic imaging procedures performed
- Surgical procedures performed
- Blood sample for PCT determination – done daily

### 4.3 Trial drugs

Drugs prescribed on basis of PCT levels and changes belong to following categories: Antibacterial chemotherapeutics and Antifungal chemotherapeutics. Drugs from these categories will also be prescribed for the control group (and in patients not included in the trial), when indicated from other findings than level/change of PCT. An exhaustive list of drugs, used in the participating ICU's (and thereby also in the trial subjects and controls) is given in appendix

#### 4.3.1 Dosing Details

The following details on dosing of all prescribed antimicrobials during the study period must be recorded in the "Medication form" in the CRF.

- Date of initial therapy
- Dose at each dosing change, together with reason for change
- Date of last dose of each agent
- Reason for discontinuation
- Date of resumption of therapy

#### 4.3.2 Collection of Blood Samples for Daily Analysis

Plasma from the PCT group and the control group will be collected early each morning (01.00 a.m.-06.00 a.m.) and will be transported to the Department of Clinical Microbiology Hvidovre Hospital, DK-2650 Hvidovre (or other laboratories, that can provide a PCT analysis real-time and with an analysing method which is approved by the PASS coordinating centre) and analysed immediately hereafter. The results from this analysis will be communicated via a

1  
2  
3 webbased cryptized licensed answering system every day to the Intensive Care Units for  
4 patients randomised to the PCT intervention arm or concealed for patients randomised to the  
5 control arm. Remaining material for the blood samples will hereafter be frozen for later analysis  
6 of other biochemical, biological and genetic markers (-80°C). Once the trial has been  
7 completed, the coupling of these samples to person-identifiers will be broken, and hence  
8 subsequent analyses done without any possibility to connect the results to individual persons  
9 involved in the trial. For detailed instructions regarding the collection, labelling, processing and  
10 transport of samples, see the Manual of Operational Procedures.

11  
12 It is the responsibility of the investigator (to be assisted by the courier service and PASS  
13 coordinating office) to ensure that all trial samples for transport are appropriately handled,  
14 packed and transported.

#### 25 26 **4.3.3 Genetic markers (PASS-sub-study)**

27 The PASS-sub-study has three aims: 1. quality assessment of the procalcitonin analyzes used  
28 in the PASS-Study, 2. to investigate the relation between levels of procalcitonin and other  
29 biomarkers and 3. to investigate if genetic markers can be used to gain an early knowledge of  
30 the course of critical illness.

31  
32 To investigate this, we will use the remaining material from the blood samples collected for the  
33 PASS-Study. Blood plasma and DNA material will be frozen at minus 80 degrees Celcius. The  
34 PASS-Sub-study, therefore, will not mean any inconvenience for the study subjects and no  
35 additional blood sampling. This material will be kept in anonymous form for 5 years after the  
36 closure of the PASS-Study. Known hereditary diseases will not be examined.

37  
38 Regarding 1.: In a randomly assigned set of blood samples, and additionally in samples that  
39 have shown extreme PCT values a double determination will be performed to assess the inter-  
40 assay variability.

41  
42 Regarding 2.: Other biomarkers as interleukin-6 and soluble TNF- $\alpha$  receptor have been, and are  
43 still under assessment as predictive markers at sepsis and in other infectious diseases. In  
44 plasma, these and other markers will be analyzed after the closure of the PASS-Study to  
45 assess the value of these markers compared to PCT, also as prognostic markers.

46  
47 Regarding 3.: Genetic polymorphisms (e.g. mannan-binding lectins, interleukins, complement,  
48 immunoglobulin receptor, Toll-like receptor 1-9, and Factor V Leiden) are related to the prognosis  
49 at sepsis and can, to some degree, identify patient groups with a high risk of a fatal course of  
50

the disease. An increasing number of international studies have during the latest years investigated the relation between the genetic disposition of patients and the course of infectious diseases, but often, these studies have been small and without sufficient statistical power to conclude on these issues.

The statistical power in investigating the relation between genetic polymorphisms and mortality in sepsis depends on the frequency of a certain allele, the mortality in the study population and the size of the population.

Directly applied on the study population of the PASS-Study with 1000 cases of sepsis (mortality ~25%) it will result in a 80 % statistical power to show a 2-fold increase in mortality for an allele that is found in 3% of the population. For alleles that are more frequent, we will be able to show less than a 2-fold increase in mortality. As an example of this, the homozygote forms of TNF- $\alpha$ , IL-1 $\beta$ , and PAI-1 have a frequency of 5, 7, and 14%, respectively. Heterozygote forms of TLR4 and factor V Leiden have a frequency of 9 and 7%.

## 5 DATA ANALYSIS METHODS

### 5.1 Sample Size Determination

The trial will randomise (1:1) 1,000 subjects into two treatment arms:

- 1: Control arm
- 2: The PCT guided intervention arm

With a sample size of 500 per group and an assumed mortality rate of 25% in the control group and 17.5 % in the PCT group there will be 80% probability that a negative result (Confirming the Null Hypothesis) is true. At the same time there will be < 5% probability of falsely declaring the alternative hypothesis correct. [Power 80%, stringency 5%]. Sample Size calculations via Dept. of Statistics, UCLA, California, USA.

### 5.2 General Considerations

#### 5.2.1 Analysis Populations

The primary population for analyses of the efficacy and safety data will be the intention to treat population, including all randomised subjects who have at least one blood sample made for PCT measurements.

Response to PCT guided diagnostic and therapeutic interventions will also be investigated descriptively by summary statistics for various sub-groups, e.g. gender, other demographic variables, Baseline APACHE II score, and pre-admittance health assessment.



### 5.2.2 Interim Analysis

Safety and efficacy data will be reviewed when 250, 500 and 750 subjects have completed the trial period (until discharge from the hospital or death, maximally 28 days), or at least every 6 th month, and assessments will be made by an independent Data and Safety Monitoring Board (DSMB). A cut-off date will be specified at this point and all treatment failure and adverse event data before this date will be used.

The Peto method of repeated significance testing will be used to test for treatment difference and a p-value of 0.001 will be used as the significance level at the interim analysis, giving a significance level of 0.05 for the final analysis once all patients have completed the trial.

Stopping the trial will not be based purely on a statistical decision but also on the recommendation of the DSMB.

### 5.2.3 Other Issues

All subjects will remain in the trial and be followed-up until day 180.

## 5.3 Efficacy

### 5.3.1 Primary Efficacy Endpoint

The primary efficacy analysis will be the comparison of the two treatment groups with respect to the incidence of mortality within 28 days after enrolment in the trial. Mortality is defined as all-cause mortality. Subjects not followed for the entire duration of the trial (i.e. lost to follow-up) will be counted as survivors. Very few patients will be lost to follow up for the primary endpoint, because of the Danish Central Person Register (CPR), where all deaths in Denmark are registered. Only subjects who permanently move their address to another country within 30 days after ICU admission can be lost to follow-up. The stratified log-rank test and Kaplan Meier estimates will be used.

### 5.3.2 Secondary Efficacy Endpoint(s)

#### 5.3.2.1 Other mortality assessments

The proportion of subjects, who survive to different points of time (at discharge, after 60, 90 and 180 days, counting after ICU admission). The log rank test and Kaplan-Meier estimates will be used. Differences in proportions of survivors will be assessed using the Mantel-Haenzel Chi Square test and Wilcoxon test. Subjects with missing mortality data will be classified as survivors.



### 5.3.2.2 Other parameters than mortality

- Defined day doses of antimicrobial therapy in each arm
- Occurrence of sepsis, severe sepsis, septic shock, DIC. Assessment of Glasgow Coma Scale, measurement of Blood Pressure (systolic blood pressure < 90), days with artificial ventilation, Factor 2-7-9 < 0.7, creatinine (increase factor 3 from baseline), MODS.
- SOFA score daily (Temperature, Mean Arterial Pressure, Heart Rate, Respiratory Rate, FIO<sub>2</sub>, HCO<sub>3</sub><sup>-</sup>, pH (arterial), Se- Na<sup>+</sup>, K<sup>+</sup>, Creatinine, Haematocrite, White Blood Count+ differential count, Glasgow Coma Scale).
- AUC<sub>Procalcitonin</sub> for the Procalcitonin-measuring group and for the control group.
- Number of diagnostic images after admission to the ICU.
- Number of non-routine microbiological sample taken after admittance to the ICU.
- Number of surgical procedures during the trial
- Time to the first change in antimicrobial chemotherapy after admittance to the ICU
- Occurrence of new clinically, microbiologically or radiologically diagnosed infections while admitted to the ICU
- Discharge and post-discharge daily function and health state

For endpoints that have normally distributed numbers, t-test will be used in assessment of statistical significance. If not normally distributed, Mantel-Haenzel Chi Square test and the Wilcoxon test, will be used.

Exploratory analysis of adjustments for possible confounders present at baseline for the analysis presented above will be performed using Cox proportional hazards and Logistic regression modelling (as appropriate).

### 5.3.3 Combined evaluation of mortality / occurrence of serious bacterial infection while admitted to the ICU

The proportion of patients who die during the trial period or who experience occurrence of a serious bacterial infection (sepsis, severe sepsis, septic shock, Disseminated Intravascular Coagulation (DIC) or Multi Organ Dysfunction Syndrome (MODS) (which ever came first) as a function of time since trial initiation. In this analysis, patients discontinuing the randomised treatment for other reasons before having failed in this analysis will be censored from the time of discontinuation.

#### 5.4 Safety

Adverse events will be tabulated by treatment group, maximum intensity, attributability to various antimicrobial agents and by seriousness. Treatment related adverse events that lead the subject to prematurely discontinue one or more of the originally prescribed antimicrobial agents will also be summarised.

Clinical chemistry and haematology results will be presented by summary statistics and quartile plots of measured results. Change from baseline for these results will also be presented.

Baseline is defined as the laboratory data collected at Day 1 (before the first blood sample for PCT analysis). Subjects must have both a baseline and an "on treatment" measurement to be included in the change from baseline analysis.

Treatment emergent toxicity grades will be presented for each graded laboratory parameter by treatment group. A graded toxicity is considered treatment emergent if it develops or increases in intensity, post Day 1. Treatments will include established and approved antimicrobial treatments, which are already used daily in the participating ICU's.

Concurrent medications and blood products will be summarised by randomised treatment group.

## 6 ADVERSE EVENTS (AE) AND SERIOUS ADVERSE EVENTS (SAE)

As mentioned other places in this protocol, the direct inconvenience for subjects in this study is sampling of 7 ml of whole blood daily in the same session as the routine blood samples are made, every morning. Therefore it is reasonable to expect that AE's and SAE's as a direct consequence of this blood sampling will not occur. Indirect AE's as a consequence of potential overly treatment are likewise not likely to occur according to the available literature on the issue, especially because the most striking result of the previously published RCT's is a reduction of antibiotic exposure in the PCT-guided group.

*All interventions, that are performed in this study are well-known, thoroughly tested and accepted treatments, so it does not seem reasonable to apply the same procedures for this study regarding AE's as e.g. a study where a new drug is to be assessed for safety (or effect)*

*Investigators will, however, have the opportunity to report events, that they find unexpected in the Case Report Form. In this part of the CRF, it is possible to classify unexpected events in groups of "relatedness" to the antimicrobial treatment as "no relation", "unlikely relation", "possibly related", "probably related" or "definitely related".*

### **Serious unexpected events or unexpected events**

Serious unexpected events and unexpected events, that can be related to the antimicrobial treatment will in both treatment groups be reported to the Danish Medicines Agency "Lægemiddelstyrelsen" according to the Danish legislation on this point

The primary and the secondary endpoints that are registered daily in the case report form are all *adverse events or serious adverse events, i.e. death, complications to sepsis, increased antibiotic exposition and prolonged hospital stay. These are registered routinely and daily in the part of the CRF dealing with effects of the treatments. All patients are at inclusion in the study threatened by potentially lethal illnesses.*

## **7 TRIAL ADMINISTRATION**

### **7.1 Data Collection**

Case Report Forms (CRF) will be provided for each subject by the PASS coordinating centre. All data on the CRFs must be entered legibly in black ink or typed, in Danish or English. Amendments and errors on the CRFs should not be erased, covered with correction fluid or completely crossed-out; rather, a single line should be drawn through the error and the correction initialled and dated by the investigator, authorised colleague or co-worker. An explanatory note for the change should also be written on the CRF. Any requested information which is not obtained or unanswerable should be identified by entering 'ND' (not done). An explanation must be documented for any missing data. CRFs must be completed regularly and should never bear the participant's name. Participants will be identified by initials, date of birth and subject trial number only.

The investigator (or a person appointed by the investigator) must sign and date a declaration on the CRF attesting to his/her responsibility for the quality of all data recorded and that the data represents a complete and accurate record of each subject's participation in the trial.

Details and procedures for the completion of the CRFs are specified in the Manual of Operational Procedures.

All trial CRFs will be plain paper copies – the original being the investigators copy. After completion of each page of the CRF, the investigator will send it by fax to the PASS coordinating centre. Pages will be reviewed and clarified in accordance with the protocol specific Review and Validation Manual. The data will be double entered (punched and verified) by separate data entry specialists to produce data files.

1  
2  
3 Identical validation checks will be performed on each database. Data failing any check will be  
4 flagged for output on a Data Clarification Report (DCR) and sent to the relevant investigator for  
5 resolution. In such cases the investigator is requested to sign and date any explanation or  
6 correction. On return, the database will be updated appropriately and the original DCR stored  
7 with the original CRF.  
8  
9

10  
11  
12 The database(s) will be subject to agreed Quality Control (QC) checks before authorisation. The  
13 data will be subsequently analysed according to the methods outlined in Section 5.  
14  
15

## 16 17 **7.2 Regulatory and Ethical Considerations**

### 18 19 **7.2.1 Regulatory Authority Approval**

20  
21 The co-ordinator (in collaboration with the PASS coordinating centre) will obtain approval from  
22 the appropriate regulatory agency prior to initiating the trial at a site.  
23  
24

25  
26 This trial will be conducted in accordance with ICH-GCP and all applicable regulations,  
27 including, where applicable, the Declaration of Helsinki, June 1964, as modified by 52nd WMA  
28 General Assembly, Edinburgh, Scotland, October 2000 (see Appendix 1).  
29  
30

### 31 32 **7.2.2 Ethics Approval**

33  
34 It is the investigator's responsibility to ensure that this protocol is reviewed and approved by the  
35 appropriate local Independent Ethics Committee (IEC). The IEC must also review and approve  
36 the site's informed consent form (ICF) and any other written information provided to the subject  
37 prior to any enrolment of subjects, and any advertisement that will be used for subject  
38 recruitment. The co-ordinator and/or the investigator must forward to the PASS coordinating  
39 centre copies of the IEC approval and the approved informed consent materials, which must be  
40 received by the PASS coordinating centre prior to the start of the trial.  
41  
42

43  
44 If, during the trial, it is necessary to amend either the protocol or the informed consent form, the  
45 co-ordinator and/or investigator will be responsible for ensuring the IEC reviews and approves  
46 these amended documents. IEC approval of the amended ICF must be obtained before new  
47 subjects consent to take part in the trial using this version of the form. Copies of the IEC  
48 approval of the amended ICF and the approved amended ICF must be forwarded to the PASS  
49 coordinating centre as soon as available.  
50  
51

### 52 53 **7.2.3 Subject Informed Consent**

54  
55 The investigator or his/her designee will inform the subject of all aspects pertaining to the  
56 subject's participation in the trial.  
57  
58

The process for obtaining subject informed consent will be in accordance with all applicable regulatory requirements. The investigator or his/her designee and the subject/ witness of an oral informed consent/ subjects legally acceptable representative must both sign and date the ICF before the subject can participate in the trial. Following types of informed consent can be accepted because of the nature of the ICU setting and the physical and/ or mental state of the subjects.

1) Ability to understand and provide written informed consent to participate in this trial,

or

2) Ability to understand and provide oral informed consent in presence of at least one impartial witness who should sign and personally date the consent form

or

3) The subjects legally acceptable representative can understand and provide written informed consent if the subject is not capable of this because of the present mental or physical condition of the subject.

The subject will receive a copy of the signed and dated form and the original will be retained in the site trial records. The decision regarding subject participation in the trial, that is made by the subject, is entirely voluntary. The investigator or his/her designee must emphasize to the subject that consent regarding trial participation may be withdrawn at any time without penalty or loss of benefits to which the subject is otherwise entitled.

If the ICF is amended during the trial, the investigator must follow all applicable regulatory requirements pertaining to approval of the amended ICF by the IEC and use of the amended form (including for ongoing subjects).

### 7.3 Trial Monitoring

In accordance with applicable regulations, good clinical practice (GCP), monitors will periodically contact the site, including conducting on-site visits. The extent, nature and frequency of on-site visits will be based on enrolment rate, the quality of the documents provided by the site, consistency of follow-up of the patients according to this protocol.

During these contacts, the monitor will:

- check and assess the progress of the trial

## Procalcitonin and Survival Study (PASS)

- review trial data collected
- conduct Source Document Verification
- identify any issues and address their resolution

This will be done in order to verify that the:

- data are authentic, accurate, and complete
- safety and rights of subjects are being protected
- trial is conducted in accordance with the currently approved protocol (and any amendments), GCP, and all applicable regulatory requirements

The investigator agrees to allow the monitor direct access to all relevant documents and to allocate his/her time and the time of his/her staff to the monitor to discuss findings and any relevant issues.

In addition to contacts during the trial, the monitor will also contact the site prior to the start of the trial to discuss the protocol and data collection procedures with site personnel.

At trial closure, monitors will also conduct all activities as indicated in Section 7.5, Trial and Site Closure.

#### **7.4 Quality Assurance**

At its discretion, the PASS coordinating centre may conduct a quality assurance audit of this trial. If such an audit occurs, the investigator agrees to allow the auditor direct access to all relevant documents and to allocate his/her time and the time of his/her staff to the auditor to discuss findings and any relevant issues. A guideline for audit is available at the PASS coordinating centre.

In addition, regulatory agencies may conduct a regulatory inspection of this trial. If such an inspection occurs, the investigator agrees to allow the inspector direct access to all relevant documents and to allocate his/her time and the time of his/her staff to the inspector to discuss findings and any relevant issues.

#### **7.5 Trial and Site Closure**

Upon completion of the trial, the following activities, when applicable, must be conducted by the monitor in conjunction with the investigator, as appropriate:

- return of all trial data to the PASS coordinating centre

- data clarifications and/or resolutions
- review of site trial records for completeness
- shipment of stored samples to assay laboratory

In addition, the steering committee reserves the right to temporarily suspend or prematurely discontinue this trial either at a single site or at all sites at any time and for any reason. If such action is taken, selected members of the PASS steering committee and/or the PASS coordinating centre will discuss this with the Investigator (including the reasons for taking such action) at that time. The PASS coordinating centre will promptly inform all other investigators conducting the trial if the trial is suspended or terminated for safety reasons. The investigators will inform their local/regional/national regulatory authorities (as appropriate) of the suspension or termination of the trial and the reason(s) for the action. If required by applicable regulations, the investigator must inform the IEC promptly and provide the reason for the suspension or termination.

If the trial is prematurely discontinued, all trial data must be returned to the PASS coordinating centre.

## 7.6 Records Retention

In accordance with applicable regulatory requirements, following closure of the trial, the investigator will maintain a copy of all site trial records in a safe and secure location. The PASS coordinating centre will inform the investigator of the time period for retaining these records in order to comply with applicable regulatory requirements.

## 7.7 Information Disclosure and Inventions

### 7.7.1 Confidentiality

The investigator and other trial site personnel will keep confidential any information provided by the co-ordinating centre (including this protocol) related to this trial and all data and records generated in the course of conducting the trial, and will not use the information, data, or records for any purpose other than conducting the trial. These restrictions do not apply to: (1) information which becomes publicly available through no fault of the investigator or trial site personnel; (2) information which it is necessary to disclose in confidence to an IEC solely for the evaluation of the trial; or (3) information which it is necessary to disclose in order to provide appropriate medical care to a trial subject.



### 7.7.2 Publication

The findings from this trial is intended to be published in peer-reviewed journals. The steering committee decides whether abstracts are to be submitted to conferences, and how the results are distributed if more than one manuscript is to be drafted.

**Authorship:** The trial group as a whole will appear in an appendix in all published manuscripts. Co-authors are selected after a fair evaluation of primarily number of patients entered in to the trial and the level of involvement in the drafting of the manuscript. Providing that several manuscripts are to be drafted, a fair rotation among the participating clinical sites of co-authorship slots will be done taking in to consideration the number of patients enrolled.

### 7.8 Indemnification and Compensation for Injury

The insurance that covers liability in relation to patient care in Denmark, *Patientforsikringen* will cover all liability aspects of the conduct of this trial<sup>45-46</sup>.



## 8. REFERENCES

- 1: Garnacho-Montero J, Garcia-Garmendia JL, Barrero-Almodovar A, Jimenez-Jimenez FJ, Perez-Paredes C, Ortiz-Leyba C. Impact of adequate empirical antibiotic therapy on the outcome of patients admitted to the intensive care unit with sepsis. *Crit Care Med* 2003;3:2742-51.
- 2: Alberti C, Brun-Buisson C, Burchardi H, Martin C, Goodman S, Artigas A, Sicignano A, Palazzo M, Moreno R, Boulme R, Lepage E, Le Gall R. Epidemiology of sepsis and infection in ICU patients from an international multicentre cohort study. *Intensive Care Med.* 2002 Feb;28(2):108-21. Epub 2001 Dec 04.
- 3: Alberti C, Brun-Buisson C, Goodman SV, et al. European Sepsis Group. Influence of systemic inflammatory response syndrome and sepsis on outcome of critically ill infected patients. *Am J Respir Crit Care Med* 2003;168:77-84. Epub 2003 Apr 17.
4. Azoulay E, Alberti C, Legendre I, Brun Buisson C, Le Gall JR. Post-ICU mortality in critically ill infected patients: an international study. *Intensive Care Med.* 2004 Nov 4; [Epub ahead of print]
5. Iapichino G, Morabito A, Mistraretti G, Ferla L, Radrizzani D, Reis Miranda D. Determinants of post-intensive care mortality in high-level treated critically ill patients. *Intensive Care Med.* 2003 Oct;29(10):1751-6. Epub 2003 Aug 16.
6. Moreno R, Miranda DR, Matos R, Feveireiro T. Mortality after discharge from intensive care: the impact of organ system failure and nursing workload use at discharge. *Intensive Care Med.* 2001 Jun;27(6):999-1004.
7. Azoulay E, Adrie C, De Lassence A, Pochard F, Moreau D, Thiery G, Cheval C, Moine P, Garrouste-Orgeas M, Alberti C, Cohen Y, Timsit JF. Determinants of postintensive care unit mortality: a prospective multicenter study. *Crit Care Med.* 2003 Feb;31(2):428-32.
- 8: Assicot M, Gendrel D, Carsin H, Raymond J, Guilbaud J, Bohuon C. High serum procalcitonin concentrations in patients with sepsis and infection. *Lancet* 1993;341:515-8.
9. Ittner L, Born W, Rau B, Steinbach G, Fischer JA. Circulating procalcitonin and cleavage products in septicaemia compared with medullary thyroid carcinoma. *Eur J Endocrinol.* 2002 Dec;147(6):727-31.
10. Redl H, Schlag G, Togel E, Assicot M, Bohuon C. Procalcitonin release patterns in a baboon model of trauma and sepsis: relationship to cytokines and neopterin. *Crit Care Med.* 2000 Nov;28(11):3659-63.
11. Nijsten MW, Olinga P, The TH, de Vries EG, Koops HS, Groothuis GM, Limburg PC, ten Duis HJ, Moshage H, Hoekstra HJ, Bijzet J, Zwaveling JH. Procalcitonin behaves as a fast responding acute phase protein in vivo and in vitro. *Crit Care Med.* 2000 Feb;28(2):458-61.
12. Chirouze C, Schuhmacher H, Rabaud C, Gil H, Khayat N, Estavoyer JM, May T, Hoen B. Low serum procalcitonin level accurately predicts the absence of bacteremia in adult patients with acute fever. *Clin Infect Dis.* 2002 Jul 15;35(2):156-61. Epub 2002 Jun 17.
13. Reny JL, Vuagnat A, Ract C, Benoit MO, Safar M, Fagon JY. Diagnosis and follow-up of infections in intensive care patients: value of C-reactive protein compared with other clinical and biological variables. *Crit Care Med.* 2002 Mar;30(3):529-35.
14. Balci C, Sungurtekin H, Gurses E, Sungurtekin U, Kaptanoglu B. Usefulness of procalcitonin for diagnosis of sepsis in the intensive care unit. *Crit Care.* 2003 Feb;7(1):85-90. Epub 2002 Oct 30.
15. Hatherill M, Tibby SM, Turner C, Ratnavel N, Murdoch IA. Procalcitonin and cytokine levels: relationship to organ failure and mortality in pediatric septic shock. *Crit Care Med.* 2000 Jul;28(7):2591-4.
16. Hatherill M, Tibby SM, Sykes K, Turner C, Murdoch IA. Diagnostic markers of infection: comparison of procalcitonin with C reactive protein and leucocyte count. *Arch Dis Child.* 1999 Nov;81(5):417-21.

- 1  
2  
3  
4  
5  
6  
7  
8  
9  
10  
11  
12  
13  
14  
15  
16  
17  
18  
19  
20  
21  
22  
23  
24  
25  
26  
27  
28  
29  
30  
31  
32  
33  
34  
35  
36  
37  
38  
39  
40  
41  
42  
43  
44  
45  
46  
47  
48  
49  
50  
51  
52  
53  
54  
55  
56  
57  
58  
59  
60
- 17: Meisner M, Rauschmayer C, Schmidt J, et al. Early increase of procalcitonin after cardiovascular surgery in patients with postoperative complications. *Intensive Care Med* 2002;28:1094-102. Epub 2002 Jul 06.
- 18: Adamik B, Kubler-Kielb J, Golebiowska B, Gamian A, Kubler A. Effect of sepsis and cardiac surgery with cardiopulmonary bypass on plasma level of nitric oxide metabolites, neopterin, and procalcitonin: correlation with mortality and postoperative complications. *Intensive Care Med* 2000;26:1259-67.
- 19: Lindberg M, Hole A, Johnsen H, et al. Reference intervals for procalcitonin and C-reactive protein after major abdominal surgery. *Scand J Clin Lab Invest* 2002;62:189-94.
- 21: Aouifi A, Piriou V, Blanc P, et al. Effect of cardiopulmonary bypass on serum procalcitonin and C-reactive protein concentrations. *Br J Anaesth*. 1999;83:602-7.
- 22: Conlon JM, Grimelius L, Thim L. Structural characterization of a high-molecular-mass form of calcitonin [procalcitonin-(60-116)-peptide] and its corresponding N-terminal flanking peptide [procalcitonin-(1-57)-peptide] in a human medullary thyroid carcinoma. *Biochem J* 1988;256:245-50.
- 23: Birnbaum RS, Mahoney WC, Burns DM, O'Neil JA, Miller RE, Roos BA. Identification of procalcitonin in a rat medullary thyroid carcinoma cell line. *J Biol Chem* 1984;259:2870-4.
- 24: Jacobs JW, Lund PK, Potts JT Jr, Bell NH, Habener JF. Procalcitonin is a glycoprotein. *J Biol Chem* 1981;256:2803-7.
- 25: Becker KL, Nylen ES, White JC, Muller B, Snider RH Jr. Clinical review 167: Procalcitonin and the calcitonin gene family of peptides in inflammation, infection, and sepsis: a journey from calcitonin back to its precursors. *J Clin Endocrinol Metab*. 2004 Apr;89(4):1512-25. Review. No abstract available.
- 26: Linscheid P, Seboek D, Nylen ES, Langer I, Schlatter M, Becker KL, Keller U, Muller B. In vitro and in vivo calcitonin I gene expression in parenchymal cells: a novel product of human adipose tissue. *Endocrinology*. 2003 Dec;144(12):5578-84. Epub 2003 Aug 21.
- 27: Linscheid P, Seboek D, Schaer DJ, Zulewski H, Keller U, Muller B. Expression and secretion of procalcitonin and calcitonin gene-related peptide by adherent monocytes and by macrophage-activated adipocytes. *Crit Care Med*. 2004 Aug;32(8):1715-21.
- 28: Meisner M, Muller V, Khakpour Z, Toegel E, Redl H. Induction of procalcitonin and proinflammatory cytokines in an hepatic baboon endotoxin shock model. *Shock* 2003;19:187-90.
- 29: Dandona P, Nix D, Wilson MF, et al. Procalcitonin increase after endotoxin injection in normal subjects. *J Clin Endocrinol Metab* 1994;79:1605-8.
- 30: Christ-Crain M, Jaccard-Stolz D, Bingisser R, Gencay MM, Huber PR, Tamm M, Muller B. Effect of procalcitonin-guided treatment on antibiotic use and outcome in lower respiratory tract infections: cluster-randomised, single-blinded intervention trial. *Lancet*. 2004 Feb 21;363(9409):600-7.
- 31: Jensen J, Heslet L, Jensen TH, Espersen K, Steffensen P, Tvede M. Procalcitonin increase identifies critically ill patients at high risk of mortality. Submitted 26. January 2005.
- 32: Vesentini S, Bassi C, Talamini G, Cavallini G, Campedelli A, Pederzoli P. Prospective comparison of C-reactive protein level, Ranson score and contrast-enhanced computed tomography in the prediction of septic complications of acute pancreatitis. *Br J Surg* 1993;80:755-7.
- 33: Reny JL, Vuagnat A, Ract C, Benoit MO, Safar M, Fagon JY. Diagnosis and follow-up of infections in intensive care patients: value of C-reactive protein compared with other clinical and biological variables. *Crit Care Med* 2002;30:529-35.
34. Assay Characteristics, BRAHMS diagnostica, Hennigsdorf, Germany.
- 35: Meisner M, Lohs T, Huettemann E, Schmidt J, Hueller M, Reinhart K. The plasma elimination rate and urinary secretion of procalcitonin in patients with normal and impaired renal function. *Eur J Anaesthesiol*. 2001 feb;18(2):79-87.

- 1  
2  
3 36 Fleischhack G, Kambeck I, Cipic D, Hasan C, Bode U. Procalcitonin in paediatric cancer patients: its diagnostic  
4 relevance is superior to that of C-reactive protein, interleukin 6, interleukin 8, soluble interleukin 2 receptor and  
5 soluble tumour necrosis factor receptor II. *Br J Haematol*. 2000 Dec;111(4):1093-102.
- 7 37: von Lilienfeld-Toal M, Dietrich MP, Glasmacher A, Lehmann L, Breig P, Hahn C, Schmidt-Wolf IG, Marklein G,  
8 Schroeder S, Stuber F. Markers of bacteremia in febrile neutropenic patients with haematological malignancies:  
9 procalcitonin and IL-6 are more reliable than C-reactive protein. *Eur J Clin Microbiol Infect Dis*. 2004 Jul;23(7):  
10 539-44. Epub 2004 Jun 22.
- 12 38: Giamarellos-Bourboulis EJ, Grecka P, Poulakou G, Anargyrou K, Katsilambros N, Giamarellou H. Assessment  
13 of procalcitonin as a diagnostic marker of underlying infection in patients with febrile neutropenia. *Clin Infect Dis*.  
14 2001 Jun 15;32(12):1718-25. Epub 2001 May 21.
- 16 39: Persson L, Engervall P, Magnuson A, Vikerfors T, Soderquist B, Hansson LO, Tidefelt U. Use of inflammatory  
17 markers for early detection of bacteraemia in patients with febrile neutropenia. *Scand J Infect Dis*. 2004;36(5):365-  
18 71.
- 20 40: Giamarellou H, Giamarellos-Bourboulis EJ, Repoussis P, Galani L, Anagnostopoulos N, Grecka P, Lubos D,  
21 Aoun M, Athanassiou K, Bouza E, Devigili E, Krcmery V, Menichetti F, Panaretou E, Papageorgiou E, Plachouras  
22 D. Potential use of procalcitonin as a diagnostic criterion in febrile neutropenia: experience from a multicentre study.  
23 *Clin Microbiol Infect*. 2004 Jul;10(7):628-33.
- 25 41: Barnes C, Ignjatovic V, Newall F, Carlin J, Ng F, Hamilton S, Ashley D, Waters K, Monagle P. Change in serum  
26 procalcitonin (deltaPCT) predicts the clinical outcome of children admitted with febrile neutropenia. *Br J Haematol*.  
27 2002 Sep;118(4):1197-8. No abstract available.
- 29 42: Odamaki M, Kato A, Kumagai H, Hishida A. Counter-regulatory effects of procalcitonin and indoxyl sulphate on  
30 net albumin secretion by cultured rat hepatocytes. *Nephrol Dial Transplant*. 2004 Apr;19(4):797-804.
- 32 43: Nakae H, Inaba H, Endo S. Usefulness of procalcitonin in *Pseudomonas* burn wound sepsis model. *Tohoku J*  
33 *Exp Med*. 1999 Jul;188(3):271-3.
- 35 44: Holzheimer RG. Oral antibiotic prophylaxis can influence the inflammatory response in aortic aneurysm repair:  
36 results of a randomized clinical study. *J Chemother*. 2003 Apr;15(2):157-64.
- 37 45. Danish Law regulation 1997-03-24 nr. 228 about patient insurance
- 39 46. [www.patientforsikringen.dk](http://www.patientforsikringen.dk)
- 40  
41  
42  
43  
44  
45  
46  
47  
48  
49  
50  
51  
52  
53  
54  
55  
56  
57  
58  
59  
60

**Table 1: Clinical and laboratory Evaluations**

| Evaluation                                   | Day<br>(screening & baseline) |                              | Day (counting after admission<br>to ICU)<br>(follow-up) |    |    |    |     |
|----------------------------------------------|-------------------------------|------------------------------|---------------------------------------------------------|----|----|----|-----|
|                                              | 1                             | Day=Dis-<br>charge/<br>death | 28                                                      | 30 | 60 | 90 | 180 |
| Informed Consent                             | X                             |                              |                                                         |    |    |    |     |
| Entry Criteria                               | X                             |                              |                                                         |    |    |    |     |
| Demography                                   | X                             |                              |                                                         |    |    |    |     |
| APACHE II                                    | X                             | X                            |                                                         |    |    |    |     |
| Infections during this<br>hospital admission | X                             |                              |                                                         |    |    |    |     |
| Current medical conditions                   | X                             | X                            |                                                         |    |    |    |     |
| State of daily function and<br>health        | X                             |                              |                                                         | X  |    |    | X   |
| Mortality                                    |                               | (X)                          | X                                                       |    | X  | X  | X   |
| Baseline PCT                                 | X                             |                              |                                                         |    |    |    |     |
| AUC <sub>procalcitonin</sub>                 |                               | X                            |                                                         |    |    |    |     |
| Concurrent Medications <sup>a</sup>          | X                             | X                            |                                                         | X  | X  | X  | X   |
| Haematology                                  | X                             | X                            |                                                         |    |    |    |     |
| Clinical chemistry                           | X                             | X                            |                                                         |    |    |    |     |
| Adverse events                               | X <sup>a</sup>                | X                            |                                                         |    |    |    |     |
| Serious Adverse Events                       | X <sup>a</sup>                | X                            |                                                         | X  | X  | X  | X   |

a Adverse events and serious adverse events are registered daily

1  
2  
3  
4  
5  
6  
7  
8  
9  
10  
11  
12  
13  
14  
15  
16  
17  
18  
19  
20  
21  
22  
23  
24  
25  
26  
27  
28  
29  
30  
31  
32  
33  
34  
35  
36  
37  
38  
39  
40  
41  
42  
43  
44  
45  
46  
47  
48  
49  
50  
51  
52  
53  
54  
55  
56  
57  
58  
59  
60

For peer review only

## 9. APPENDICES

### Appendix 1

#### Declaration of Helsinki

### WORLD MEDICAL ASSOCIATION DECLARATION OF HELSINKI

#### Ethical Principles for Medical Research Involving Human Subjects

Adopted by the 18th WMA General Assembly

Helsinki, Finland, June 1964

and amended by the

29th WMA General Assembly, Tokyo, Japan, October 1975

35th WMA General Assembly, Venice, Italy, October 1983

41st WMA General Assembly, Hong Kong, September 1989

48th WMA General Assembly, Somerset West, Republic of South Africa, October 1996

and the

52nd WMA General Assembly, Edinburgh, Scotland, October 2000

#### A. INTRODUCTION

1. The World Medical Association has developed the Declaration of Helsinki as a statement of ethical principles to provide guidance to physicians and other participants in medical research involving human subjects. Medical research involving human subjects includes research on identifiable human material or identifiable data.
2. It is the duty of the physician to promote and safeguard the health of the people. The physician's knowledge and conscience are dedicated to the fulfillment of this duty.
3. The Declaration of Geneva of the World Medical Association binds the physician with the words, "The health of my patient will be my first consideration," and the International Code of Medical Ethics declares that, "A physician shall act only in the patient's interest when providing medical care which might have the effect of weakening the physical and mental condition of the patient."
4. Medical progress is based on research which ultimately must rest in part on experimentation involving human subjects.
5. In medical research on human subjects, considerations related to the well-being of the human subject should take precedence over the interests of science and society.
6. The primary purpose of medical research involving human subjects is to improve prophylactic, diagnostic and therapeutic procedures and the understanding of the aetiology and pathogenesis of disease. Even the best proven prophylactic, diagnostic, and therapeutic methods must continuously be challenged through research for their effectiveness, efficiency, accessibility and quality.
7. In current medical practice and in medical research, most prophylactic, diagnostic and therapeutic procedures involve risks and burdens.
8. Medical research is subject to ethical standards that promote respect for all human beings and protect their health and rights. Some research populations are vulnerable and need special protection. The particular needs of the economically and medically disadvantaged must be recognized. Special attention is also required for those who cannot give or refuse consent for themselves, for those who may be subject to giving consent under duress, for those who will not benefit personally from the research and for those for whom the research is combined with care.
9. Research Investigators should be aware of the ethical, legal and regulatory requirements for research on human subjects in their own countries as well as applicable international requirements. No national ethical, legal or regulatory requirement should be allowed to reduce or eliminate any of the protections for human subjects set forth in this Declaration.



**B. BASIC PRINCIPLES FOR ALL MEDICAL RESEARCH**

10. It is the duty of the physician in medical research to protect the life, health, privacy, and dignity of the human subject.
11. Medical research involving human subjects must conform to generally accepted scientific principles, be based on a thorough knowledge of the scientific literature, other relevant sources of information, and on adequate laboratory and, where appropriate, animal experimentation.
12. Appropriate caution must be exercised in the conduct of research which may affect the environment, and the welfare of animals used for research must be respected.
13. The design and performance of each experimental procedure involving human subjects should be clearly formulated in an experimental protocol. This protocol should be submitted for consideration, comment, guidance, and where appropriate, approval to a specially appointed ethical review committee, which must be independent of the investigator, the sponsor or any other kind of undue influence. This independent committee should be in conformity with the laws and regulations of the country in which the research experiment is performed. The committee has the right to monitor ongoing trials. The researcher has the obligation to provide monitoring information to the committee, especially any serious adverse events. The researcher should also submit to the committee, for review, information regarding funding, sponsors, institutional affiliations, other potential conflicts of interest and incentives for subjects.
14. The research protocol should always contain a statement of the ethical considerations involved and should indicate that there is compliance with the principles enunciated in this Declaration.
15. Medical research involving human subjects should be conducted only by scientifically qualified persons and under the supervision of a clinically competent medical person. The responsibility for the human subject must always rest with a medically qualified person and never rest on the subject of the research, even though the subject has given consent.
16. Every medical research project involving human subjects should be preceded by careful assessment of predictable risks and burdens in comparison with foreseeable benefits to the subject or to others. This does not preclude the participation of healthy volunteers in medical research. The design of all studies should be publicly available.
17. Physicians should abstain from engaging in research projects involving human subjects unless they are confident that the risks involved have been adequately assessed and can be satisfactorily managed. Physicians should cease any investigation if the risks are found to outweigh the potential benefits or if there is conclusive proof of positive and beneficial results.
18. Medical research involving human subjects should only be conducted if the importance of the objective outweighs the inherent risks and burdens to the subject. This is especially important when the human subjects are healthy volunteers.
19. Medical research is only justified if there is a reasonable likelihood that the populations in which the research is carried out stand to benefit from the results of the research.
20. The subjects must be volunteers and informed participants in the research project.
21. The right of research subjects to safeguard their integrity must always be respected. Every precaution should be taken to respect the privacy of the subject, the confidentiality of the patient's information and to minimize the impact of the study on the subject's physical and mental integrity and on the personality of the subject.
22. In any research on human beings, each potential subject must be adequately informed of the aims, methods, sources of funding, any possible conflicts of interest, institutional affiliations of the researcher, the anticipated benefits and potential risks of the study and the discomfort it may entail. The subject should be informed of the right to abstain from participation in the study or to withdraw consent to participate at any time without reprisal. After ensuring that the subject has understood the information, the physician should then obtain the subject's freely-given informed consent, preferably in writing. If the consent cannot be obtained in writing, the non-written consent must be formally documented and witnessed.
23. When obtaining informed consent for the research project the physician should be particularly cautious if the subject is in a dependent relationship with the physician or may consent under duress. In that case the informed consent should be obtained by a well-informed physician who is not engaged in the investigation and who is completely independent of this relationship.
24. For a research subject who is legally incompetent, physically or mentally incapable of giving consent or is a legally incompetent minor, the investigator must obtain

## Procalcitonin and Survival Study (PASS)

- 1  
2  
3 informed consent from the legally authorized  
4 representative in accordance with applicable law. These  
5 groups should not be included in research unless the  
6 research is necessary to promote the health of the  
7 population represented and this research cannot instead  
8 be performed on legally competent persons.  
9
- 10 25. When a subject deemed legally incompetent, such as a  
11 minor child, is able to give assent to decisions about  
12 participation in research, the investigator must obtain that  
13 assent in addition to the consent of the legally authorized  
14 representative.  
15
- 16 26. Research on individuals from whom it is not possible to  
17 obtain consent, including proxy or advance consent,  
18 should be done only if the physical/mental condition that  
19 prevents obtaining informed consent is a necessary  
20 characteristic of the research population. The specific  
21 reasons for involving research subjects with a condition  
22 that renders them unable to give informed consent should  
23 be stated in the experimental protocol for consideration  
24 and approval of the review committee. The protocol  
25 should state that consent to remain in the research  
26 should be obtained as soon as possible from the  
27 individual or a legally authorized surrogate.  
28
- 29 27. Both authors and publishers have ethical obligations. In  
30 publication of the results of research, the investigators are  
31 obliged to preserve the accuracy of the results. Negative  
32 as well as positive results should be published or  
33 otherwise publicly available. Sources of funding,  
34 institutional affiliations and any possible conflicts of  
35 interest should be declared in the publication. Reports of  
36 experimentation not in accordance with the principles laid  
37 down in this Declaration should not be accepted for  
38 publication.  
39  
40  
41  
42  
43  
44  
45  
46  
47  
48  
49  
50  
51  
52  
53  
54  
55  
56  
57  
58  
59  
60

**C. ADDITIONAL PRINCIPLES FOR MEDICAL RESEARCH COMBINED WITH MEDICAL CARE**

28. The physician may combine medical research with medical care, only to the extent that the research is justified by its potential prophylactic, diagnostic or therapeutic value. When medical research is combined with medical care, additional standards apply to protect the patients who are research subjects.
29. The benefits, risks, burdens and effectiveness of a new method should be tested against those of the best current prophylactic, diagnostic, and therapeutic methods. This does not exclude the use of placebo, or no treatment, in studies where no proven prophylactic, diagnostic or therapeutic method exists.
30. At the conclusion of the study, every patient entered into the study should be assured of access to the best proven prophylactic, diagnostic and therapeutic methods identified by the study.
31. The physician should fully inform the patient which aspects of the care are related to the research. The refusal of a patient to participate in a study must never interfere with the patient-physician relationship.
32. In the treatment of a patient, where proven prophylactic, diagnostic and therapeutic methods do not exist or have been ineffective, the physician, with informed consent from the patient, must be free to use unproven or new prophylactic, diagnostic and therapeutic measures, if in the physician's judgement it offers hope of saving life, re-establishing health or alleviating suffering. Where possible, these measures should be made the object of research, designed to evaluate their safety and efficacy. In all cases, new information should be recorded and, where appropriate, published. The other relevant guidelines of this Declaration should be followed.



## Appendix 2: Abbreviations

|    |                               |                                                          |
|----|-------------------------------|----------------------------------------------------------|
| 1  |                               |                                                          |
| 2  |                               |                                                          |
| 3  |                               |                                                          |
| 4  |                               |                                                          |
| 5  |                               |                                                          |
| 6  |                               |                                                          |
| 7  | <b>AE</b>                     | <b>Adverse Event (AE)</b>                                |
| 8  | <b>ALAT</b>                   | <b>Alanine Aminotransferase (SGOT)</b>                   |
| 9  |                               |                                                          |
| 10 | <b>APACHE II</b>              | <b>Acute Physiology And Chronic Health Evaluation II</b> |
| 11 |                               |                                                          |
| 12 | <b>ASAT</b>                   | <b>Aspartate Aminotransferase (SGPT)</b>                 |
| 13 |                               |                                                          |
| 14 | <b>CDC</b>                    | <b>Centers for Disease Control</b>                       |
| 15 | <b>CRF</b>                    | <b>Case Report Form</b>                                  |
| 16 |                               |                                                          |
| 17 | <b>DDD</b>                    | <b>Defined Day Doses</b>                                 |
| 18 | <b>DIC</b>                    | <b>Disseminated Intravascular Coagulation</b>            |
| 19 |                               |                                                          |
| 20 | <b>DSMB</b>                   | <b>Data Safety Monitoring Board</b>                      |
| 21 | <b>ICU</b>                    | <b>Intensive Care Unit</b>                               |
| 22 |                               |                                                          |
| 23 | <b>IEC</b>                    | <b>Independent Ethics Committee</b>                      |
| 24 |                               |                                                          |
| 25 |                               |                                                          |
| 26 | <b>IL-6</b>                   | <b>Interleukin 6</b>                                     |
| 27 |                               |                                                          |
| 28 | <b>MODS</b>                   | <b>Multi Organ Dysfunction Syndrome</b>                  |
| 29 |                               |                                                          |
| 30 |                               |                                                          |
| 31 | <b>PASS</b>                   | <b>Procalcitonin and Survival Study</b>                  |
| 32 | <b>PCT</b>                    | <b>Procalcitonin</b>                                     |
| 33 |                               |                                                          |
| 34 | <b>SAE</b>                    | <b>Serious Adverse Event</b>                             |
| 35 |                               |                                                          |
| 36 | <b>TNF<math>\alpha</math></b> | <b>Tumor Necrosis Factor <math>\alpha</math></b>         |
| 37 |                               |                                                          |
| 38 | <b>WBC</b>                    | <b>White Blood cell Count</b>                            |
| 39 |                               |                                                          |
| 40 |                               |                                                          |
| 41 |                               |                                                          |
| 42 |                               |                                                          |
| 43 |                               |                                                          |
| 44 |                               |                                                          |
| 45 |                               |                                                          |
| 46 |                               |                                                          |
| 47 |                               |                                                          |
| 48 |                               |                                                          |
| 49 |                               |                                                          |
| 50 |                               |                                                          |
| 51 |                               |                                                          |
| 52 |                               |                                                          |
| 53 |                               |                                                          |
| 54 |                               |                                                          |
| 55 |                               |                                                          |
| 56 |                               |                                                          |
| 57 |                               |                                                          |
| 58 |                               |                                                          |
| 59 |                               |                                                          |
| 60 |                               |                                                          |

**Appendix 3: Table of conversion factors for laboratory units**

| TEST                           | CONVENTIONAL         |        | SI                               |        |
|--------------------------------|----------------------|--------|----------------------------------|--------|
|                                | Unit                 | Factor | Unit                             | Factor |
| Haemoglobin                    | g/dl                 | 0,6206 | mmol/l                           | 1,61   |
| Platelets                      | Thou/mm <sup>3</sup> | 0,001  | <sup>a</sup> x10 <sup>9</sup> /l | 1000   |
| Hyponatraemia<br>(↓ Sodium)    | mEq/l                | 1,0    | mmol/l                           | 1,0    |
| Hypernatraemia<br>(↑ Sodium)   | mEq/l                | 1,0    | mmol/l                           | 1,0    |
| Hypokalaemia<br>(↓ Potassium)  | mEq/l                | 1,0    | mmol/l                           | 1,0    |
| Hyperkalaemia<br>(↑ Potassium) | mEq/l                | 1,0    | mmol/l                           | 1,0    |
| Hypoglycaemia<br>(↓ Glucose)   | mg/dl                | 0,0555 | mmol/l                           | 18,0   |
| Hyperglycaemia<br>(↑ Glucose)  | mg/dl                | 0,0555 | mmol/l                           | 18,0   |
| Hypocalcaemia<br>(↓ Calcium)   | mg/dl                | 0,2495 | mmol/l                           | 4,0    |
| Hypercalcaemia<br>(↑ Calcium)  | mg/dl                | 0,2495 | mmol/l                           | 4,0    |

<sup>a</sup> No SI unit

For example: Haemoglobin 9,5 g/dl - multiply by factor 0,6206 → 5,9 mmol/l

## Appendix 4: Table with the used antibacterial and antifungal drugs used in the 6 participating Intensive Care Units.

| Generic name                | Comercial name (s)                                                            |
|-----------------------------|-------------------------------------------------------------------------------|
| Benzyl-Penicillin           | Penicillin"Leo", Penicillin"Rosco" Benzyl-Penicillin"Panpharma"               |
| Phenoxymethyl-Penicillin    | Calcipen ®, Pancillin ®, Primcillin ®, Rocilin ®, Vepicombin ®"DAK"           |
| Dicloxacillin               | Dicillin ®, Diclocil ®                                                        |
| Flucloxacillin              | Heracillin                                                                    |
| Amoxicillin                 | Amoxicillin"NM", Flemoxin Solutab ®, Imacillin ®, Imadrax ®,                  |
| Amoxicillin+Clavulanic Acid | Bioclavid, Bioclavid Forte, Spektramox ®                                      |
| Ampicillin                  | Ampicillin"Vepidan", Doktacillin, Pentrexyl ®                                 |
| Piperacillin                | Ivacin ®, Pipril                                                              |
| Piperacillin+Tazobactam     | Tazocin ®                                                                     |
| Pivampicillin               | Pondocillin ®                                                                 |
| Pivmecillinam/ Mecillinam   | Selexid ®                                                                     |
| Cefalexin                   | Keflex ®                                                                      |
| Cefalotin                   | Keflin ®                                                                      |
| Cefepim                     | Maxipime ®                                                                    |
| Cefotaxim                   | Claforan ®                                                                    |
| Ceftazidim                  | Fortum ®                                                                      |
| Ceftriaxon                  | Rocephalin ®                                                                  |
| Cefuroxim                   | Zinacef, Cefuroxim Stragen, Zinnat ®                                          |
| Aztreonam                   | Azactam ®                                                                     |
| Meropenem                   | Meronem ®                                                                     |
| Imipenem+cilastatin         | Tienam ®                                                                      |
| Azithromycin                | Zitromax ®                                                                    |
| Clarithromycin              | Klacid ®, Klacid ® Uno, Klaricid, Zeclar                                      |
| Erythromycin                | Abboticin ®, Abboticin ® Novum, Erycin ®, Escumycin, Hexabotin ®              |
| Roxithromycin               | Surlid ®, Forimycin ®, Roximstad, Roxithromycin"Copyfarm", Roxithromycin"UNP" |
| Doxycyclin                  | Vibradox ®                                                                    |
| Lymecyclin                  | Tetralysal ®                                                                  |
| Oxytetracyclin              | Oxytetral ®                                                                   |
| Tetracyclin                 | Tetracyclin"AL", Tetracyclin"DAK", Tetracyclin"SAD"                           |

|                              |                                                                                                                                                                                             |
|------------------------------|---------------------------------------------------------------------------------------------------------------------------------------------------------------------------------------------|
| Gentamicin                   | Garamycin ®, Gentacoll ®, Hexamycin, Septopal, Septopal Mini                                                                                                                                |
| Netilmicin                   | Netilyn                                                                                                                                                                                     |
| Tobramycin                   | Nebcina ®, Tobi ®                                                                                                                                                                           |
| Moxifloxacin                 | Avelox                                                                                                                                                                                      |
| Ciprofloxacin                | Ciproxin ®, Cifin, Ciprofloxacin“1A Farma”, Ciprofloxacin“2K Pharma”, Ciprofloxacin“Alpharma”, Ciprofloxacin“Biochemie”, Ciprofloxacin“Gea”, Ciprofloxacin“Ratiopharm”, Sancipro, Sibunar ® |
| Ofloxacin                    | Tarivid ®                                                                                                                                                                                   |
| Norfloxacin                  | Zoroxin ®                                                                                                                                                                                   |
| Methenamin                   | Haiprex                                                                                                                                                                                     |
| Nitrofurantoin               | Nitrofurantoin“DAK”, Nitrofurantoin“SAD”                                                                                                                                                    |
| Sulfamethizol                | Lucosil ®, Sulfametizol“SAD”, Sulfametizol“Ophtha”                                                                                                                                          |
| Trimethoprim                 | Monotrim ®, Trimethoprim“1A Farma”, Trimopan                                                                                                                                                |
| Sulfamethoxazol+Trimethoprim | Sulfamethoxazol+Trimethoprim“SAD”, Sulfotrim ®                                                                                                                                              |
| Clindamycin                  | Dalacin ®                                                                                                                                                                                   |
| Colistin                     | Colimycin                                                                                                                                                                                   |
| Teicoplanin                  | Targocid ®                                                                                                                                                                                  |
| Vancomycin                   | Vancocin, Vancomycin“Abbott”, Vancomycin“Alpharma”                                                                                                                                          |
| Fusidinsyre                  | Fucidin ®                                                                                                                                                                                   |
| Linezolid                    | Zyvoxid ®                                                                                                                                                                                   |
| Metronidazol                 | Flagyl ®, Metronidazol“Alpharma”, Metronidazol“DAK”, Metronidazol“SAD”                                                                                                                      |
| Amphotericin B               | Abelcet, AmBisome, Fungizone                                                                                                                                                                |
| Caspofungin                  | Cancidas ®                                                                                                                                                                                  |
| Fluconazol                   | Conasol, Diflucan ®, Fluconazol“Alpharma”, Fluconazol“Copyfarm”, Fluconazol“Nycomed”, Fluconazol“Ratiopharm”, Fluconazol“Stada”, Fungal ®, Fungustatin                                      |
| Flucytosin                   | Ancotil                                                                                                                                                                                     |
| Ketoconazol                  | Nizoral ®                                                                                                                                                                                   |
| Voriconazol                  | Vfend                                                                                                                                                                                       |
| Ethambutol                   | Myambutol ®                                                                                                                                                                                 |
| Isoniacid                    | Isoniacid“OBA”                                                                                                                                                                              |
| Pyrazinamid                  | Pyrazinamid“Medic”, Pyrazinamid“SAD”                                                                                                                                                        |
| Rifabutin                    | Rifabutin“Pharmacia”                                                                                                                                                                        |
| Rifampicin                   | Rimactan ®                                                                                                                                                                                  |



**Kidney failure related to broad-spectrum antibiotics in critically ill patients: secondary end point results from a 1200 patient randomized trial**

|                               |                                                                                                                                                                                                                                                                                                                                                                                                                                                                                                                                                                                                                                                                                                                                                                                                                                                                                                                                                                                                                                                                                                                                                                                                                                                                                                                                                                                                                                                                                                                                                                                                                                                                                                                                                                                                                                                                                                                                                                                                                                                                                                                                                                                                                                                                                                                       |
|-------------------------------|-----------------------------------------------------------------------------------------------------------------------------------------------------------------------------------------------------------------------------------------------------------------------------------------------------------------------------------------------------------------------------------------------------------------------------------------------------------------------------------------------------------------------------------------------------------------------------------------------------------------------------------------------------------------------------------------------------------------------------------------------------------------------------------------------------------------------------------------------------------------------------------------------------------------------------------------------------------------------------------------------------------------------------------------------------------------------------------------------------------------------------------------------------------------------------------------------------------------------------------------------------------------------------------------------------------------------------------------------------------------------------------------------------------------------------------------------------------------------------------------------------------------------------------------------------------------------------------------------------------------------------------------------------------------------------------------------------------------------------------------------------------------------------------------------------------------------------------------------------------------------------------------------------------------------------------------------------------------------------------------------------------------------------------------------------------------------------------------------------------------------------------------------------------------------------------------------------------------------------------------------------------------------------------------------------------------------|
| Journal:                      | <i>BMJ Open</i>                                                                                                                                                                                                                                                                                                                                                                                                                                                                                                                                                                                                                                                                                                                                                                                                                                                                                                                                                                                                                                                                                                                                                                                                                                                                                                                                                                                                                                                                                                                                                                                                                                                                                                                                                                                                                                                                                                                                                                                                                                                                                                                                                                                                                                                                                                       |
| Manuscript ID:                | bmjopen-2011-000635.R1                                                                                                                                                                                                                                                                                                                                                                                                                                                                                                                                                                                                                                                                                                                                                                                                                                                                                                                                                                                                                                                                                                                                                                                                                                                                                                                                                                                                                                                                                                                                                                                                                                                                                                                                                                                                                                                                                                                                                                                                                                                                                                                                                                                                                                                                                                |
| Article Type:                 | Research                                                                                                                                                                                                                                                                                                                                                                                                                                                                                                                                                                                                                                                                                                                                                                                                                                                                                                                                                                                                                                                                                                                                                                                                                                                                                                                                                                                                                                                                                                                                                                                                                                                                                                                                                                                                                                                                                                                                                                                                                                                                                                                                                                                                                                                                                                              |
| Date Submitted by the Author: | 03-Jan-2012                                                                                                                                                                                                                                                                                                                                                                                                                                                                                                                                                                                                                                                                                                                                                                                                                                                                                                                                                                                                                                                                                                                                                                                                                                                                                                                                                                                                                                                                                                                                                                                                                                                                                                                                                                                                                                                                                                                                                                                                                                                                                                                                                                                                                                                                                                           |
| Complete List of Authors:     | <p>Jensen, Jens-Ulrik; Faculty of Health Sciences, University of Copenhagen, Copenhagen HIV Programme; University Hospital of Copenhagen, Bispebjerg, Pulmonary Medicine (L)</p> <p>Hein, Lars; Copenhagen University Hospital Hillerød, Department of Anesthesia and Intensive Care ; Copenhagen University Hospital Glostrup, Department of Anesthesia and Intensive Care</p> <p>Lundgren, Bettina; University Hospital of Copenhagen Rigshospitalet, Diagnostic Centre</p> <p>Bestle, Morten; Copenhagen University Hospital Hillerød, Department of Anesthesia and Intensive Care</p> <p>Mohr, Thomas; Copenhagen University Hospital Gentofte, Department of Anesthesia and Intensive Care</p> <p>Andersen, Mads; Aarhus University Hospital in Skejby, Department of Anesthesia and Intensive Care</p> <p>Thornberg, Klaus; Copenhagen University Hospital Gentofte, Department of Anesthesia and Intensive Care</p> <p>Løken, Jesper; Copenhagen University Hospital Hvidovre, Department of Anesthesia and Intensive Care</p> <p>Steensen, Morten; Copenhagen University Hospital Hvidovre, Department of Anesthesia and Intensive Care</p> <p>Fox, Zoë; Royal Free Hospital School of Medicine in London, Research Department of Infection and Population Health; University of Copenhagen, Faculty of Health Sciences, Copenhagen HIV Programme</p> <p>Tousi, Hamid; Copenhagen University Hospital Herlev, Department of Anesthesia and Intensive Care</p> <p>Søe-Jensen, Peter; Copenhagen University Hospital Herlev, Department of Anesthesia and Intensive Care</p> <p>Lauritsen, Anne; Copenhagen University Hospital Glostrup, Department of Anesthesia and Intensive Care</p> <p>Strange, Ditte; Copenhagen University Hospital Glostrup, Department of Anesthesia and Intensive Care</p> <p>Reiter, Nanna; University Hospital in Roskilde, Department of Anesthesia and Intensive Care</p> <p>Thormar, Katrin; Copenhagen University Hospital Gentofte, Department of Anesthesia and Intensive Care</p> <p>Fjeldbord, Paul; Aarhus University Hospital in Skejby, Department of Anesthesia and Intensive Care</p> <p>Larsen, Kim; Aarhus University Hospital in Aarhus, Department of Anesthesia and Intensive Care</p> <p>Drenck, Niels-Erik; University Hospital in Roskilde, Department of</p> |

|                                 |                                                                                                                                                                                                                                                                                                                                                                                                                                                                                                                                                                                                                                                                                                    |
|---------------------------------|----------------------------------------------------------------------------------------------------------------------------------------------------------------------------------------------------------------------------------------------------------------------------------------------------------------------------------------------------------------------------------------------------------------------------------------------------------------------------------------------------------------------------------------------------------------------------------------------------------------------------------------------------------------------------------------------------|
|                                 | Anesthesia and Intensive Care<br>Østergaard, Christian; Copenhagen University Hospital Hvidovre, Clinical Microbiology<br>Johansen, Maria; University of Copenhagen, Faculty of Health Sciences, Copenhagen HIV Programme<br>Nielsen, Lene; University of Copenhagen, Faculty of Health Sciences, Copenhagen HIV Programme<br>Kjær, Jesper; University of Copenhagen, Faculty of Health Sciences, Copenhagen HIV Programme<br>Grarup, Jesper; University of Copenhagen, Faculty of Health Sciences, Copenhagen HIV Programme<br>Lundgren, Jens; University of Copenhagen, Faculty of Health Sciences, Copenhagen HIV Programme; Copenhagen University Hospital Rigshospitalet, Infectious Diseases |
| <b>Primary Subject Heading</b>: | Infectious diseases                                                                                                                                                                                                                                                                                                                                                                                                                                                                                                                                                                                                                                                                                |
| Secondary Subject Heading:      | Renal medicine, Intensive care, Patient-centred medicine, Pharmacology & therapeutics                                                                                                                                                                                                                                                                                                                                                                                                                                                                                                                                                                                                              |
| Keywords:                       | Adult intensive & critical care < ANAESTHETICS, Acute renal failure < NEPHROLOGY, Adverse events < THERAPEUTICS, Toxicity < THERAPEUTICS, Clinical trials < THERAPEUTICS                                                                                                                                                                                                                                                                                                                                                                                                                                                                                                                           |
|                                 |                                                                                                                                                                                                                                                                                                                                                                                                                                                                                                                                                                                                                                                                                                    |

SCHOLARONE™  
Manuscripts

Review only

1  
2  
3 Kidney failure related to broad-spectrum antibiotics in critically ill  
4  
5  
6 patients: secondary end point results from a 1200 patient randomized trial  
7

8  
9 Corresponding author Jens-Ulrik Jensen, Copenhagen HIV Programme, The Panum Institute,  
10  
11 Faculty of Health Sciences, University of Copenhagen, Blegdamsvej 3B, DK-2200 Copenhagen N,  
12  
13 [juj@cphiv.dk](mailto:juj@cphiv.dk)

14  
15 Jens Ulrik Jensen *medical doctor*<sup>1,2</sup>, Lars Hein *anaesthetist*<sup>3,4</sup>, Bettina Lundgren *centre director*,  
16  
17 *hospital diagnostic centre*<sup>2,5</sup>, Morten Heiberg Bestle *anaesthetist*<sup>4</sup>, Thomas Mohr *anaesthetist*<sup>6</sup>,  
18  
19 Mads Holmen Andersen *anaesthetist*<sup>7</sup>, Klaus Julius Thornberg *anaesthetist*<sup>6</sup>, Jesper Løken  
20  
21 *anaesthetist*<sup>8</sup>, Morten Steensen *anaesthetist*<sup>8</sup>, Zoe Fox *biostatistician*<sup>1,9</sup>, Hamid Tousi *anaesthetist*<sup>10</sup>,  
22  
23 Peter Søre-Jensen *anaesthetist*<sup>10</sup>, Anne Øberg Lauritsen *anaesthetist*<sup>3</sup>, Ditte Gry Strange  
24  
25 *anaesthetist*<sup>3</sup>, Nanna Reiter *anaesthetist*<sup>11</sup>, Katrin Thormar *anaesthetist*<sup>6</sup>, Paul Christian Fjeldborg  
26  
27 *anaesthetist*<sup>7</sup>, Kim Michael Larsen *anaesthetist*<sup>12</sup>, Niels-Erik Drenck *anaesthetist*<sup>11</sup> Maria Egede  
28  
29 Johansen *junior research associate*<sup>1</sup>, Lene Ryom *junior research executive*<sup>1</sup>, Christian Østergaard  
30  
31 *senior research executive*<sup>2,13</sup>, Jesper Kjær *database manager*<sup>1</sup>, Jesper Grarup *administrative leader*  
32  
33 <sup>1</sup>, Jens D. Lundgren *professor of infectious diseases*<sup>1,14</sup> of the The Procalcitonin And Survival  
34  
35 Study (PASS) Group\*.  
36  
37

38  
39 <sup>1</sup>Copenhagen HIV Programme at the University of Copenhagen; <sup>2</sup>Department of Clinical  
40  
41 Microbiology at Copenhagen University Hospital Hvidovre; <sup>3</sup>Department of Anesthesia and  
42  
43 Intensive Care at Copenhagen University Hospital Glostrup; <sup>4</sup>Department of Anesthesia and  
44  
45 Intensive Care at Copenhagen University Hospital Hillerød; <sup>5</sup>Diagnostic Centre at Copenhagen  
46  
47 University Hospital Rigshospitalet; <sup>6</sup>Department of Anesthesia and Intensive Care at Copenhagen  
48  
49 University Hospital Gentofte; <sup>7</sup>Department of Anesthesia and Intensive Care at Aarhus University  
50  
51 Hospital in Skejby; <sup>8</sup>Department of Anesthesia and Intensive Care at Copenhagen University  
52  
53 Hospital Hvidovre; <sup>9</sup>Royal Free Hospital School of Medicine in London; <sup>10</sup>Department of  
54  
55  
56  
57  
58  
59  
60

1  
2  
3 Anesthesia and Intensive Care at Copenhagen University Hospital Herlev; <sup>11</sup>Department of  
4  
5 Anesthesia and Intensive Care at Copenhagen University Hospital in Roskilde; <sup>12</sup>Department of  
6  
7 Anesthesia and Intensive Care at Aarhus University Hospital in Aarhus; <sup>13</sup>Department of Clinical  
8  
9 Microbiology at Copenhagen University Hospital Herlev; <sup>14</sup>Department of Infectious Diseases at  
10  
11 Copenhagen University Hospital Rigshospitalet. All except<sup>9</sup> are from Denmark. <sup>9</sup> is from England.

12  
13  
14 \*Participating investigators are listed in the appendix.

15  
16 Running Title: Broad-Spectrum Antibiotics and Renal Failure in Critically Ill Patients

17  
18 Keywords: Antibiotics – Renal Failure – Sepsis – Intensive Care  
19

20  
21  
22 **Copyright:** The Corresponding Author has the right to grant on behalf of all authors and does grant  
23  
24 on behalf of all authors, an exclusive licence (or non exclusive for government employees) on a  
25  
26 worldwide basis to the BMJ Publishing Group Ltd and its licensees , to permit this article (if  
27  
28 accepted) to be published in BMJ editions and any other BMJPG products and to exploit all  
29  
30 subsidiary rights, as set out in our licence.  
31  
32  
33  
34  
35  
36  
37  
38  
39  
40  
41  
42  
43  
44  
45  
46  
47  
48  
49  
50  
51  
52  
53  
54  
55  
56  
57  
58  
59  
60



## Abstract

Objectives: To explore whether a strategy of more intensive antibiotic therapy leads to emergence or prolongation of renal failure in intensive care patients.

Design: Secondary analysis from a randomized antibiotic strategy trial (the PASS study). The randomized arms were conserved from the primary trial for the main analysis.

Setting: Nine mixed surgical/medical intensive care units across Denmark.

Participants: 1200 adult intensive care patients, 18+ years, expected to stay +24 hours. Exclusion criteria: Bilirubin >40 mg/dL. Triglycerides >1000 mg/dL, Increased risk from blood sampling, pregnant/breast feeding and psychiatric patients.

Interventions: Patients were randomized to: guideline-based therapy ('standard-exposure'-arm), or to guideline-based therapy supplemented with antibiotic escalation whenever procalcitonin increased on daily measurements ('high-exposure'-arm).

Main outcome measures: Primary endpoint: estimated GFR <60 ml/min/1.73 m<sup>2</sup>. Secondary endpoints: a) delta eGFR after starting/stopping a drug, b) RIFLE criterion Risk "R". Analysis was by intention to treat.

Results: 28-day mortality was 31.8% and comparable (Jensen et al, CCM 2011). A total of 3672/7634 (48.1%) study days during follow-up in the 'high-exposure' vs. 3016/6949 (43.4%) in the 'standard-exposure'-arm were spent with eGFR <60 ml/min/1.73m<sup>2</sup>, p<0.001. In a multiple effects model, piperacillin/tazobactam was identified as causing the lowest rate of renal recovery of all antibiotics: 1.0 ml/min/1.73 m<sup>2</sup> per 24h while exposed to this drug [95% CI: 0.7 – 1.3 ml/min/1.73 m<sup>2</sup>/24h] vs. meropenem: 2.9 ml/min/1.73 m<sup>2</sup>/24h [2.5 – 3.3 ml/min/1.73 m<sup>2</sup>/24h]); after discontinuing piperacillin/tazobactam, the renal recovery rate increased: 2.7 ml/min/1.73 m<sup>2</sup> /24h [2.3 – 3.1 ml/min/1.73 m<sup>2</sup> /24h]). eGFR <60 ml/min/1.73m<sup>2</sup> in the two groups at entry and at last day of follow-up was 57% vs. 55% and 41% vs. 39%, resp.

1  
2  
3 Conclusions: Piperacillin/tazobactam was identified as a cause of delayed renal recovery in  
4  
5 critically ill patients. This nephrotoxicity was not observed when using other beta-lactam  
6  
7 antibiotics.  
8

9  
10 Trial registration ClinicalTrials.gov identifier NCT00271752.  
11

## 12 13 14 **Introduction**

15  
16  
17 Frequent complications to sepsis are organ failure, especially respiratory failure and renal failure<sup>1-3</sup>.

18  
19 Critically ill patients are more vulnerable to organ-related drug toxicities than less severely ill  
20  
21 patients<sup>4</sup>. Randomized trials assessing safety of broad-spectrum antibiotics in intensive care settings  
22  
23 are generally scarce, do not have sufficient statistical power for assessing organ failure endpoints,  
24  
25 and do often not include defined kidney organ failure endpoints<sup>5-7</sup>. Data on renal failure endpoints  
26  
27 are also sparse in the published trials from other patient populations, and since the absolute risk of  
28  
29 renal failure is low for these patients, analyses may likely have been underpowered<sup>8-12</sup>.

30  
31  
32 To our knowledge, randomized trials comparing ‘high exposure’ vs. ‘standard exposure to  
33  
34 antibiotics’ and specifically addressing whether these interventions affect the occurrence and  
35  
36 duration of kidney failure have not been done before in intensive care settings.  
37

38  
39 In this secondary analysis from a randomized trial, the PASS study<sup>13</sup>, we aimed to explore whether  
40  
41 a strategy of more intensive antibiotic therapy leads to adverse renal outcomes within 28 days after  
42  
43 recruitment.  
44

45  
46 In our study population (and often in severely infected ICU patients), a bacterial hit has resulted in  
47  
48 acute onset renal failure, and this bacterial hit (and related organ failure) is often the reason for ICU  
49  
50 admittance. In such situations, with the correct treatment of the underlying infection, we expect  
51  
52 renal function to recover. “Lack of recovery” is a non-desirable situation, which may be very  
53  
54 serious for the patient. We wanted to explore this, and realizing, RIFLE/AKIN could not capture  
55  
56  
57  
58  
59  
60

1  
2  
3 this, we have used  $eGFR < 60 \text{ ml/min/1.73 m}^2$  as the primary endpoint and examined this from  
4  
5 different angles ( $eGFR < 60 \text{ ml/min/1.73 m}^2$  at day 7, days with  $\text{ml/min/1.73 m}^2$ ). The multiple  
6  
7 effects model was built to capture actual estimates of renal function improvement using different  
8  
9 antibiotics and adjusting for other known or suspected causes of renal dysfunction.  
10  
11 Secondly, if renal failure was observed from the ‘high exposure’ approach, to identify one or  
12  
13 several of the antibiotics used in this trial as the cause of such a renal failure.  
14

## 15 16 **Methods**

### 17 18 **Trial design and participants**

19  
20 *PASS* is a multicentre randomized controlled trial in Denmark 2006-9 in 1200 adult critically ill  
21  
22 patients, expected to stay in one of the nine participating mixed medical/surgical intensive care  
23  
24 units  $\geq 24$  hours; the CONSORT trial diagram is displayed in supplementary figure 1. Patients were  
25  
26 randomized 1:1 either to treatment according to international guidelines: ‘standard exposure arm’,  
27  
28 or to same guidelines but supplemented with daily drug-escalation initiated upon procalcitonin  
29  
30 increases (‘high exposure’-arm); 28-day mortality was 31.8% and comparable between the two  
31  
32 groups, as reported<sup>13</sup>.  
33  
34

35  
36 To be eligible, patients had to be  $\geq 18$  years, enrolled within 24 hours of admission to the intensive  
37  
38 care unit and have an expected intensive care-admission length of  $\geq 24$  hours. Patients with known  
39  
40 bilirubin  $> 40 \text{ mg/dL}$  and triglycerides  $> 1000 \text{ mg/dL}$  (not suspensive) were not eligible (interference  
41  
42 with procalcitonin measurements), as were patients who were judged to be at an increased risk from  
43  
44 blood sampling. The inclusion criteria were broad since infection is frequent and often causes  
45  
46 complications in the patient group and to increase the external validity of the results. The person or  
47  
48 next of kin gave informed consent. The study protocol was approved by the regional ethics  
49  
50 committees in Denmark (H-KF-272-753) and adheres to the Helsinki declaration, revised in Seoul  
51  
52 2008.  
53  
54  
55  
56  
57  
58  
59  
60

1  
2  
3 In the present analyses we explored presence and duration of renal failure as well as change in renal  
4 function during the observed time. Endpoints are defined in *statistical analysis* below. Patients  
5 were followed until day 28. The primary trial protocol and the analysis plan is available in the  
6 online supplement. Analysis was by intention to treat: NCT00271752.  
7  
8  
9

### 10 11 **Randomization and masking**

12  
13 Randomization was performed 1:1 using a computerized algorithm created by the database manager  
14 (JK) with concealed block-size, pre-stratified for site of recruitment, initial APACHE-II and age  
15 (entered in an encrypted screening form in a password protected website); investigators were  
16 masked to assignment before, but not after, randomization. All investigators were trained by the  
17 coordinating centre and had to register in an investigator-database. Investigators, treating physicians  
18 and the coordinator were unaware of outcomes during the study, as were they of all procalcitonin  
19 measurements in the 'standard exposure' (control)-group.  
20  
21  
22  
23  
24  
25  
26  
27  
28  
29  
30  
31

### 32 **Antibiotic therapy in the two arms**

33  
34 The investigators enrolled participants and assigned the 'high exposure group' participants to the  
35 intervention. In the 'standard exposure' group, the antimicrobial treatment was guided according to  
36 current clinical guidelines<sup>14</sup>, based on clinical assessment, microbiology and radiology among other  
37 parameters, as described elsewhere<sup>13</sup>  
38  
39  
40  
41  
42

43 In the 'high exposure' group, the use of antimicrobial interventions was guided by the same clinical  
44 guidelines as in the 'standard exposure' group to ascertain the best standard of care therapy for all  
45 patients, and additionally antimicrobial interventions were initiated whenever procalcitonin levels  
46 were not decreasing at a pre-defined pace (supplementary figure 2) and diagram D1 in the online  
47 supplement where a site-adjusted local guideline is displayed.  
48  
49  
50  
51  
52  
53  
54  
55  
56  
57  
58  
59  
60

### Measurements, data collection and follow-up

Blood samples for biomarker measurement were made daily in the intensive care unit, beginning immediately after randomization. The assay used was the Kryptor®-PCT. Organ failure and antibiotic exposure was followed up for until 28 days or death, as described<sup>13</sup>. Mortality was followed via the National Patient Register in which all deaths in Denmark are registered within 14 days. Good Clinical Practice guidelines were applied. The regional ethics board approved the protocol (H-KF-01-272-753).

### Statistical analysis

The primary endpoint was 'estimated GFR<60 ml/min/1.73 m<sup>2</sup>' and several analyses were made to explore this: 'days with estimated GFR<60 ml/min/1.73 m<sup>2</sup>', 'risk of estimated GFR<60 ml/min/1.73 m<sup>2</sup> on day 1-7'. Secondary endpoints were a) delta eGFR after starting/stopping a drug, b) RIFLE-criteria *Risk* 'R', *Injury* 'I' and *Failure* 'F' [www.adqi.net](http://www.adqi.net). Other endpoints explored were 'ever' blood-urea level  $\geq 20$  mmol/L and eGFR<30.

The multiple effects eGFR 'slope' analyses, were adjusted for the following variables: treatment arm ('high exposure' vs. 'standard exposure'), age ( $\geq 65$  vs.  $< 65$  years), gender, baseline APACHE II score ( $\geq 20$  vs.  $< 20$ ), degree of host response/infection at baseline (severe sepsis/septic shock vs. milder or no infection as defined<sup>15</sup>), the eGFR at initiation of the investigated antibiotic, and finally, whether the patient at baseline was considered to be 'surgical' or 'medical'.

Comparisons were made between treatment arms using Students t-tests (for normal distributed continuous data) and Mann-Whitney U-tests (for non-normally distributed continuous data). Chi-squared tests and logistic regression models were used to test categorical variables. Time-to-event analyses comparing the 'high exposure' group with the 'standard exposure' group were performed using Kaplan-Meier plots and Cox proportional hazards models. Interactions were explored whenever an interaction could be rationally expected according to background literature, for the

1  
2  
3 multivariate models performed. Statistical analyses were performed using STATA Version 10.2,  
4  
5 and SAS version 9.1. All reported p-values are 2-sided using a level of significance of 0.05.  
6  
7  
8

### 9 10 **Sample size**

11 A multivariate approach power calculation was made: The summed squared correlations ( $\Sigma\rho^2$ ) to  
12 the risk of the antibiotic drug investigated, was set to 0.3. The frequency of the endpoint in the  
13  
14 'standard exposure' group was set to 20%, the sample size was set to 1200, and the frequency of  
15  
16 the exposure was set at 30%, which resulted in a detection limit for odds ratio of  $\geq 1.5$  (or  $\leq 0.67$ ).  
17  
18  
19  
20  
21  
22

## 23 **Results**

### 24 25 **Baseline characteristics**

26  
27  
28 Nine sites included 1200 persons between 09/01/06 and 02/06/09. Eighty-three percent of the  
29  
30 patients were assessed by the investigator to have an infection at baseline and 81% of the patients  
31  
32 suffered from chronic co-morbidity. Supplementary table 1 briefly summarizes baseline  
33  
34 characteristics. Mortality was comparable between the two groups, as reported<sup>13</sup>.  
35  
36  
37  
38

### 39 **Follow-up**

40  
41 Follow-up for renal measures during the 28-day study period was made on 9,348 days in the  
42  
43 'standard-exposure' group of 10,755 days alive and admitted to hospital (86.9%) vs. 9,866 of  
44  
45 11,380 days in the 'high exposure group' (86.7%). If time after discharge from hospital (where no  
46  
47 S-creatinine values were determined) until day 28 was included, the percentage of days with  
48  
49 assessment of renal failure was 71.2% (9,348/13,130 days) vs. 73.8% (9,866/13,377 days)."  
50  
51  
52  
53  
54  
55  
56  
57  
58  
59  
60

### Use of Antibiotics

The antibiotics used most while admitted to the ICU were piperacillin/tazobactam, cefuroxim, meropenem and ciprofloxacin, and there was a substantial higher use of piperacillin/tazobactam and ciprofloxacin in the 'high exposure' arm (supplementary table 2). Vancomycin was used to a lesser extent in both groups and aminoglycosides and colistin were used rarely in both groups.

The median length of an antibiotic course was prolonged using the 'high exposure'-algorithm (6 days (IQR 3, 11) vs. 4 days (IQR 3, 10),  $p=0.004$ ).

### Renal failure in the originally randomized study arms

The % of days within day 1-28 with  $eGFR \leq 60$  ml/min/m<sup>2</sup> was 48% in the 'high exposure' arm vs. 43% in the 'standard exposure' arm,  $p<0.0001$ . Results in table 1 are estimated eGFR values, based on actual measured S-creatinine values; results regarding days with eGFR were comparable if using the 'last observation carried forward' approach (not shown). RIFLE-criterion 'R' occurred more often within day 1-28 in the 'high exposure' arm than the 'standard exposure' arm: 209 patients vs. 170 patients,  $p=0.02$ , as did blood urea levels exceeding 20 mmol/L: 253 (43.4%) vs. 217 (37.4%),  $p=0.04$ .

The frequency of renal failure on the last day of follow-up was comparable between the arms (table 2), underlining that the results depicted in table 1 reflect a temporary extension of duration of renal failure in the "high exposure group" and furthermore that this observation is not explained by premature discharge of renally incompetent patients in the 'standard exposure' arm.

### Glomerular Filtration Rate changes and exposure to certain antibiotics

Comparison of the eGFR of all patients (both study arms) for the first ten days after starting on the most frequently used betalactam antibiotics showed that the slowest recovery of renal function was

1  
2  
3 observed in patients on piperacillin/tazobactam as compared to patients on meropenem or  
4  
5 cefuroxim (figure 1). A multiple effects model investigating the eGFR regression coefficient  
6  
7 ('increase in eGFR') per day on these drugs confirmed that renal recovery was lowest in patients on  
8  
9 piperacillin/tazobactam (table 3). Of note, renal recovery seems to be low in patients exposed to  
10  
11 cefuroxim, but as displayed in fig. 1, this drug is given to patients with a relatively normal renal  
12  
13 function (leaving few possibilities for 'recovery').  
14

15  
16 For the first five days following discontinuation of these drugs, adjusting for the same variables,  
17  
18 eGFR increased at the highest rate in patients receiving piperacillin/tazobactam (table 3).  
19

20  
21 The frequency of eGFR<60 ml/min/1.73 m<sup>2</sup> on day 7 (or at death or last follow-up day) in the trial  
22  
23 was 523/1200 = 43.6%. This endpoint was investigated in a forward censored (p<0.1) logistic  
24  
25 regression. .. Use of piperacillin/tazobactam and other frequently used beta-lactam drugs for at least  
26  
27 three days within these first seven days, as well as known and suspected predictors of renal failure  
28  
29 were explored in a multivariable logistic regression analysis. Five independent predictors of renal  
30  
31 failure on day 7 were identified: Age above 65 years, APACHE II score >20, Charlson's co-  
32  
33 morbidity score ≥2, estimated GFR at baseline and use of piperacillin/tazobactam for at least 3 days  
34  
35 within the first 7 days (table 4) Excluding all patients who died within the first seven days,  
36  
37 excluding all patients with invasive fungal infection on day 1-28, combining the betalactam  
38  
39 exposure with exposure to flour-quinolone exposure (data not shown) or 4) adding 'Alert-  
40  
41 procalcitonin' at baseline as a variable, did not alter the signal (data not shown).  
42  
43  
44  
45

## 46 **Discussion**

### 47 **Principal findings**

48  
49 We observed that the duration of renal failure is prolonged in critically ill patients randomized to  
50  
51 receive high exposure to broad-spectrum antibiotics and escalated diagnostic work-up according to  
52  
53 a biomarker-strategy, compared to patients randomized to receive standard care according to  
54  
55  
56  
57  
58  
59  
60



1  
2  
3 guidelines regarding use of antibiotics and diagnostics. This difference in renal function was mainly  
4  
5 confined to a prolongation of existing renal dysfunction, since there was only a moderate, although  
6  
7 significant, difference in de novo acute renal failure.  
8

9  
10 To our knowledge, this study provides the first clinical report to inform this critical issue within  
11  
12 ICU medicine. Firstly, the study was a randomized, good clinical practice controlled trial with a  
13  
14 high sample size for comparison of organ failure, and the patients' baseline characteristics in  
15  
16 general and specifically regarding renal parameters, were comparable. Secondly, the rate of follow-  
17  
18 up, although not complete for the entire period, was high and equal among the groups and the rate  
19  
20 of renal failure on the last day of follow-up in the two groups was comparable. Thus, the observed  
21  
22 increased risk of persistent renal failure in the "high-exposure group" is attributable to this  
23  
24 intervention in some way.  
25  
26

27  
28 The intervention consisted of an increased number of culture samples, a proposed initiative to do  
29  
30 further diagnostic imaging (no observed difference) and a rapid and aggressive antibiotic escalation  
31  
32 with certain drugs, which was documented to be of substantial extent (supplementary table 2). As a  
33  
34 moderate increase in microbiologic sampling would not cause renal failure, and since there was no  
35  
36 observed increase in diagnostic imaging, these interventions seems implausible reasons to explain  
37  
38 the observations depicted in table 1.  
39

40  
41 This leaves us with the documented escalation in use of piperacillin/tazobactam and ciprofloxacin  
42  
43 as possible explanations. Before concluding, that the observed renal dysfunction was caused  
44  
45 directly by one (or both) of these drugs, we wanted to exclude the possibility that the results had  
46  
47 appeared because of a derived effect of an increase in fungal infections. Fungal infections have been  
48  
49 linked to broad-spectrum antibiotics<sup>16</sup>, and renal failure is a well-known complication to some  
50  
51 antifungals<sup>17</sup>. However, excluding all patients with invasive fungal infections did not alter the  
52  
53 results.  
54  
55

56  
57 Based on these results, and after having excluded other potential explanations, we realized  
58  
59  
60

1  
2  
3 that nephrotoxicity from piperacillin/tazobactam and/or ciprofloxacin was the most plausible  
4 explanation of the observed renal dysfunction. To further substantiate this, several analyses were  
5 conducted. A multiple effects model was built to examine the GFR in the days after administration  
6 of different frequently used drugs. This model included the five most often administered antibiotics,  
7 including piperacillin/tazobactam, meropenem, cefuroxim, ciprofloxacin and vancomycin along  
8 with other known and suspected causes of renal failure. In this model, the use of  
9 piperacillin/tazobactam was associated with a striking low rate of GFR-improvement, compared to  
10 the other drugs investigated. Intriguingly, this adverse effect appears to be reversible, since patients  
11 in whom, piperacillin/tazobactam was discontinued, had the fastest improvement in renal function  
12 as compared with patients on other antibiotic courses. Several sensitivity analyses were performed  
13 with findings consistent with this observation.  
14  
15  
16  
17  
18  
19  
20  
21  
22  
23  
24  
25  
26  
27  
28  
29

### 30 **Comparison with other studies**

31 Although clinical evidence regarding renal failure according to use of piperacillin/tazobactam in  
32 ICU patients has been limited, the influence of piperacillin on renal function has been investigated  
33 in healthy volunteers in laboratory experiments. In a cross-over experiment, the influence on drug  
34 clearance from concurrent administration of piperacillin and flucloxacillin was estimated<sup>18</sup>. The  
35 authors observed that flucloxacillin clearance was reduced to 45% [90% CI: 40 – 50%] when  
36 piperacillin was administered simultaneously, whereas piperacillin clearance was unaffected by  
37 concurrent flucloxacillin administration. Time-clearance slope modeling identified competitive  
38 inhibition of renal tubular secretion as the most likely explanation. Piperacillin-induced reduction of  
39 imipenem clearance<sup>19</sup> and of tazobactam clearance has also been found<sup>20</sup>, and a high correlation  
40 between creatinin clearance and piperacillin clearance has been documented<sup>21</sup>, and thus, it is  
41 plausible that piperacillin specifically causes nephrotoxicity.  
42  
43  
44  
45  
46  
47  
48  
49  
50  
51  
52  
53  
54  
55  
56  
57  
58  
59  
60

1  
2  
3 Additionally, the published randomized trials comparing piperacillin/tazobactam with other beta-  
4 lactam drugs in intensive care unit settings are scarce, underpowered for assessment of renal failure  
5 endpoints and do generally not address renal endpoints<sup>5-7</sup>. Trials from other settings: haematological  
6 patients, diabetes patients, and surgical settings do generally not investigate renal failure endpoints,  
7 and in the few (non-ICU) trials that do report kidney endpoints, the total frequency of these makes  
8 the power to avoid type II error very low (diagram D2, online supplement).  
9  
10  
11  
12  
13  
14  
15  
16  
17  
18

### 19 **Strengths and weaknesses of the study**

20 Although our study is performed on analyses from a large randomized good clinical practice  
21 controlled trial with a stringent methodology and a high level of follow-up, there are limitations that  
22 deserve mentioning: First, follow-up for organ-related measures was not complete, although we  
23 followed patients for all blood samples done in 1) the hospital, at which they were initially  
24 recruited, 2) other hospitals in Denmark, where we had electronic access to blood samples.  
25 However, patients who continued to suffer from renal failure when discharged from hospital, were  
26 out of reach for follow-up for their renal function. Of note, the fraction of patients with remaining  
27 renal failure at time of discharge was comparable between the two groups (table 2), and hence it is  
28 unlikely that this lack of ability to ascertain renal outcome contributed to our main findings.  
29  
30  
31  
32  
33  
34  
35  
36  
37  
38  
39  
40  
41  
42

43 Second, eGFR may not be an accurate measure of creatinine clearance, as recently documented by  
44 Martin et al.<sup>22</sup>. However, even though this measure is not accurate to describe the creatinine  
45 clearance, changes in eGFR reflect changes in renal function, as validated, and is closely correlated  
46 to outcome<sup>23</sup>. Additionally, we found that eGFR<60 ml/min/1.73 m<sup>2</sup> on day 7 is a strong  
47 independent predictor of mortality.  
48  
49  
50  
51  
52

53 Third, the study was a post hoc analysis using a previously published trial as material. We have  
54 tried to compensate for this by writing a detailed analysis-plan based on the hypotheses, we wanted  
55  
56  
57  
58  
59  
60

1  
2  
3 to test, before analysis. Third, although the sample size was relatively large compared to most other  
4  
5 randomized trials in this setting, the sample size for these secondary analyses were based on the  
6  
7 assumption of 25% renal failure in the 'standard exposure group' and a relative risk of 1.25 in the  
8  
9 'high exposure group'. The observed numbers were 21% and 1.22 which calls for a slightly higher  
10  
11 sample size. However, the sample size needed to show the differences observed in the multivariable  
12  
13 analyses was far smaller, and since these analyses confirmed the main findings, we do not think the  
14  
15 results are due to chance.  
16

17  
18 In this trial, for the first time ever to our knowledge, random allocation to high exposure to broad-  
19  
20 spectrum antibiotics in the intensive care unit has been systematically applied according to a  
21  
22 systematic algorithm and this resulted in prolongation of renal failure. The results were confirmed  
23  
24 when excluding patients with fungal infections, and a multiple effects model revealed a particularly  
25  
26 low renal recovery in patients while piperacillin/tazobactam was administered and a remarkable  
27  
28 recovery when discontinuing this drug; a finding that was specific for this drug. Several other crude  
29  
30 and adjusted models likewise confirmed the findings. Finally, the results from this trial are  
31  
32 supported by human experimental studies.  
33  
34  
35  
36  
37

### 38 **Conclusion**

39  
40 In conclusion, the use of piperacillin/tazobactam caused a delayed renal recovery in critically ill  
41  
42 patients, and renal function improved after discontinuation of the drug. However, the study is not  
43  
44 designed to investigate *de novo* emergence of renal failure, since the lowest renal function is at  
45  
46 baseline in most patients. We cannot within the sample size and follow-up time of this trial establish  
47  
48 whether the use of piperacillin/tazobactam, in some cases causes persistent renal failure, and thus,  
49  
50 further research to explore this is warranted. We think this impact on renal function is more likely  
51  
52 caused by a toxic effect on the renal tubule than by a lack of effect towards the infection, since this  
53  
54  
55  
56  
57  
58  
59  
60

1  
2  
3 drug is independently associated with a high chance of survival in other infected populations<sup>8</sup>, and  
4  
5 we must emphasize that our findings are strictly confined to critically ill patients.  
6  
7  
8

### 9 10 **Contributors**

11  
12 JUJ designed the study, made the data collection tools, monitored data collection for the whole trial,  
13  
14 wrote the statistical analysis plan, and drafted and the paper. He is guarantor. JUJ, ZF and JK  
15  
16 cleaned and analysed the data. JL, BL, LH, MHB, TM, MHA, KJT, JL, MS, HT, PS-J, AØL, DGS,  
17  
18 NR, KT, PCF, KML, NED, MEJ, LR, CØ, ZF, JK and JG made input study design, data collection  
19  
20 tools and analysis plan and on the manuscript. JUJ implemented the trial at the centers. All  
21  
22 members of the Procalcitonin And Survival Study (PASS) Group assisted in designing the trial.  
23  
24 The members of the PASS study group are as follows: Central Coordinating Centre - J.U. Jensen,  
25  
26 B. Lundgren, J. Grarup, M.L. Jakobsen, S. S. Reilev, M. Kofoed-Djursner, J. D. Lundgren;  
27  
28 Regional Coordinating Centres - Hvidovre - J. Løken, M. Steensen; Gentofte - T. Mohr, K.  
29  
30 Thornberg, K. Thormar; Hillerød - L.Hein, M. Bestle; Glostrup - D. Strange, A.Ø. Lauritsen;  
31  
32 Herlev - H. Tousi, P. Søre-Jensen; Roskilde - N. Reiter, N.E. Drenck; Skejby - M.H. Andersen, P.  
33  
34 Fjeldborg; Århus - K.M. Larsen; Data Management & Statistical Centre - Z. Fox, J. Kjær, D.  
35  
36 Kristensen; Procalcitonin Analysis & Logistics Centre - J.U.Jensen, B. Lundgren, M. B.  
37  
38 Rasmussen, C. S.v.Hallas, M. Zacho, J. Iversen, T. Leerbeck, M. Jeppesen, K.S. Hansen, K.B.  
39  
40 Jensen; Data and Safety Monitoring Board - H. Masur (Chair), J. Chastre, H. Schönheyder, C.  
41  
42 Pedersen; Clinical Microbiology Management – B. Lundgren, J. D. Knudsen, A. Friis-Møller, K.  
43  
44 Schønning, A. Lester, H. Westh, G. Lisby, J.K. Møller, B. Bruun, J.J. Christensen, C. Østergaard,  
45  
46 M. Arpi, K. Astvad, M.D. Bartels, J. Engberg, H. Fjeldsøe-Nielsen, U.S. Jensen; PASS Site Clinical  
47  
48 Investigators (numbers of recruited persons are in parentheses) - Glostrup (290) – L. Hein, T.  
49  
50 Mohr, D. G. Strange, P. L. Petersen, A. Ø. Lauritsen, S. Hougaard, T. Mantoni, L. Nebrich, A.  
51  
52 Bendtsen, L.H. Andersen, F. Bærentzen, Andreas Eversbusch, B. Bømler, R. Martusevicius, T.  
53  
54  
55  
56  
57  
58  
59  
60

1  
2  
3 Nielsen. P.M. Bådstøløkken, C. Maschmann, U. Grevstad, P. Hallas, A. Lindhardt, T. Galle, K.  
4  
5 Graeser, E. Hohwu-Christensen, P. Gregersen, H.C. Boesen, L.M. Pedersen, K. Thiesen, L.C.  
6  
7 Hallengreen, I. Rye, J. Cordtz, K.R. Madsen, P.R.C. Kirkegaard, L. Findsen, L.H. Nielsen, D.H.  
8  
9 Pedersen, J.H. Andersen, C. Albrechtsen, A. Jacobsen, T. Jansen, A.G. Jensen, H.H. Jørgensen, M.  
10  
11 Vazin; Gentofte (209) – L. Lipsius, K. Thornberg, J. Nielsen, K. Thormar, M. Skielboe, B. Thage,  
12  
13 C. Thoft, M. Ulbjerg, E. Anderlo, M. Engsig, F. Hani, R.B. Jacobsen. L. Mulla, U. Skram; Herlev  
14  
15 (154) – H. Tousi, P. Sjøe-Jensen, T. Waldau, T. Faber, B. Andersen, I. Gillesberg, A. Christensen,  
16  
17 C. Hartmann, R. Albret, D.S. Dinesen, K. Gani, M. Ibsen; Hvidovre (148) – J. Løken, M. Steensen,  
18  
19 J.A. Petersen, P. Carl, E. Gade, D. Solevad, C. Heiring, M. Jørgensen, K. Ekelund, A. Afshari, N.  
20  
21 Hammer, M. Bitsch, J.S. Hansen, C. Wamberg, T.D. Clausen, R. Winkel, J. Huusom, D.L. Buck, U.  
22  
23 Grevstad, E. Aasvang, K. Lenz, P. Mellado, H. Karacan, J. Hidestål, J. Høgagard, J. Højbjerg, J.  
24  
25 Højlund, M. Johansen, S. Strande; Hillerød (138) – M. Bestle, S. Hestad, M. Østergaard, N.  
26  
27 Wesche, S.A. Nielsen, H. Christensen, H. Blom, C.H. Jensen K. Nielsen, N.G. Holler, K.A.  
28  
29 Jeppesen; Århus-Skejby (94) – M.H. Andersen, P. Fjeldborg, A. Vestergaard, O. Viborg, C.D.  
30  
31 Rossau; Roskilde (90) – N. Reiter, M. Glæemose, M.B.Wranér, C.B. Thomsen, B. Rasmussen, C.  
32  
33 Lund-Rasmussen, B. Bech, K. Bjerregaard, L. Spliid, L.L.W. Nielsen, N.E. Drenck; Århus-Centre  
34  
35 (63) – K.M. Larsen, M. Goldinger, D. Illum, C. Jessen, A. Christiansen, A. Berg, T. Elkmann,  
36  
37 J.A.K. Pedersen, M. Simonsen; Bispebjerg (14) H. Joensen, H. Alstrøm, C. Svane, A. Engquist.  
38  
39 Supported by grants from the Danish Research Council, The Lundbeck Foundation, Research  
40  
41 Foundation for the Capital Region of Denmark, The Toyota Foundation, Brahms diagnostica (un-  
42  
43 restricted grant), The Harboe Foundation, The A.P. Møller Foundation and the Idella Foundation.  
44  
45 None of these had any influence on the design or conduct of the study; collection, management,  
46  
47 analysis, and interpretation of the data; nor the preparation, or approval of the manuscript. All  
48  
49 authors had full access to all of the data in the study and conjointly take responsibility for the  
50  
51 integrity of the data and the accuracy of the data analysis.  
52  
53  
54  
55  
56  
57  
58  
59  
60

## Funding

Supported by grants from the Danish Research Council, The Lundbeck Foundation, Research Foundation for the Capital Region of Denmark, The Toyota Foundation, Brahms diagnostica (unrestricted grant), The Harboe Foundation, The A.P. Møller Foundation and the Idella Foundation. None of these had any influence on the design or conduct of the study; collection, management, analysis, and interpretation of the data; nor the preparation, or approval of the manuscript.

## Competing interests

All authors have completed the Unified Competing Interest form at [www.icmje.org/coi\\_disclosure.pdf](http://www.icmje.org/coi_disclosure.pdf) (available on request from the corresponding author) and declare that the trial was funded mainly by the Danish State (Danish Research Council) and : all authors state that they have no relationships with companies that might have an interest in the submitted work in the previous 3 years; their spouses, partners, or children have no financial relationships that may be relevant to the submitted work; and all authors have no non-financial interests that may be relevant to the submitted work.

## Ethical approval

The study was approved by the ethics committee for Copenhagen and Frederiksberg community (now Ethics Committee for the Capitol Region): H-KF-01-272-753. Patient consent: We received written consent from the patient or the next of kin for trial inclusion.

## Data sharing

No additional data available.

## References

1. Levy MM, Macias WL, Vincent JL, Russell JA, Silva E, Trzaskoma B, et al. Early changes in organ function predict eventual survival in severe sepsis. *Crit Care Med.* 2005; **33**(10): 2194-201.
2. Jia X, Malhotra A, Saeed M, Mark RG, Talmor D. Risk factors for ARDS in patients receiving mechanical ventilation for > 48 h. *Chest.* 2008; **133**(4): 853-61.



3. Rubenfeld GD, Caldwell E, Peabody E, Weaver J, Martin DP, Neff M, et al. Incidence and outcomes of acute lung injury. *N Engl J Med*. 2005; **353**(16): 1685-93.
4. Kane-Gill SL, Jacobi J, Rothschild JM. Adverse drug events in intensive care units: risk factors, impact, and the role of team care. *Crit Care Med*. 2010; **38**(6 Suppl): S83-9.
5. Brun-Buisson C, Sollet JP, Schweich H, Briere S, Petit C. Treatment of ventilator-associated pneumonia with piperacillin-tazobactam/amikacin versus ceftazidime/amikacin: a multicenter, randomized controlled trial. VAP Study Group. *Clin Infect Dis*. 1998; **26**(2): 346-54.
6. Alvarez-Lerma F, Insausti-Ordenana J, Jorda-Marcos R, Maravi-Poma E, Torres-Marti A, Nava J, et al. Efficacy and tolerability of piperacillin/tazobactam versus ceftazidime in association with amikacin for treating nosocomial pneumonia in intensive care patients: a prospective randomized multicenter trial. *Intensive Care Med*. 2001; **27**(3): 493-502.
7. Marra F, Reynolds R, Stiver G, Bryce E, Sleigh K, Frighetto L, et al. Piperacillin/tazobactam versus imipenem: a double-blind, randomized formulary feasibility study at a major teaching hospital. *Diagn Microbiol Infect Dis*. 1998; **31**(2): 355-68.
8. Paul M, Yahav D, Bivas A, Fraser A, Leibovici L. Anti-pseudomonal beta-lactams for the initial, empirical, treatment of febrile neutropenia: comparison of beta-lactams. *Cochrane Database Syst Rev*. 2010; **11**: CD005197.
9. Reich G, Cornely OA, Sandherr M, Kubin T, Krause S, Einsele H, et al. Empirical antimicrobial monotherapy in patients after high-dose chemotherapy and autologous stem cell transplantation: a randomised, multicentre trial. *Br J Haematol*. 2005; **130**(2): 265-70.
10. Gomez L, Estrada C, Gomez I, Marquez M, Estany C, Marti JM, et al. Low-dose beta-lactam plus amikacin in febrile neutropenia: cefepime vs. piperacillin/tazobactam, a randomized trial. *Eur J Clin Microbiol Infect Dis*. 2010; **29**(4): 417-27.
11. Sato T, Kobayashi R, Yasuda K, Kaneda M, Iguchi A, Kobayashi K. A prospective, randomized study comparing cefozopran with piperacillin-tazobactam plus ceftazidime as empirical therapy for febrile neutropenia in children with hematological disorders. *Pediatr Blood Cancer*. 2008; **51**(6): 774-7.
12. Bow EJ, Rotstein C, Noskin GA, Laverdiere M, Schwarer AP, Segal BH, et al. A randomized, open-label, multicenter comparative study of the efficacy and safety of piperacillin-tazobactam and cefepime for the empirical treatment of febrile neutropenic episodes in patients with hematologic malignancies. *Clin Infect Dis*. 2006; **43**(4): 447-59.
13. Jensen JU, Hein L, Lundgren B, Bestle MH, Mohr TT, Andersen MH, et al. Procalcitonin-guided interventions against infections to increase early appropriate antibiotics and improve survival in the intensive care unit: A randomized trial. *Crit Care Med*. 2011.
14. Dellinger RP, Levy MM, Carlet JM, Bion J, Parker MM, Jaeschke R, et al. Surviving Sepsis Campaign: international guidelines for management of severe sepsis and septic shock: 2008. *Crit Care Med*. 2008; **36**(1): 296-327.
15. Levy MM, Fink MP, Marshall JC, Abraham E, Angus D, Cook D, et al. 2001 SCCM/ESICM/ACCP/ATS/SIS International Sepsis Definitions Conference. *Crit Care Med*. 2003; **31**(4): 1250-6.
16. Hebert C, Villaran R, Tolentino J, Best L, Boonlayangoor S, Pitrak D, et al. Prior antimicrobial exposure and the risk for bloodstream infection with fluconazole-non-susceptible *Candida* strains. *Scand J Infect Dis*. 2010; **42**(6-7): 506-9.
17. Sorkine P, Nagar H, Weinbroum A, Setton A, Israitel E, Scarlatt A, et al. Administration of amphotericin B in lipid emulsion decreases nephrotoxicity: results of a prospective, randomized, controlled study in critically ill patients. *Crit Care Med*. 1996; **24**(8): 1311-5.



- 1  
2  
3 18. Landersdorfer CB, Kirkpatrick CM, Kinzig M, Bulitta JB, Holzgrabe U, Sorgel F.  
4 Inhibition of flucloxacillin tubular renal secretion by piperacillin. *Br J Clin Pharmacol*. 2008; **66**(5):  
5 648-59.  
6 19. Saitoh H, Oda M, Gyotoku T, Kobayashi M, Fujisaki H, Sekikawa H. A beneficial  
7 interaction between imipenem and piperacillin possibly through their renal excretory process. *Biol*  
8 *Pharm Bull*. 2006; **29**(12): 2519-22.  
9 20. Komuro M, Maeda T, Kakuo H, Matsushita H, Shimada J. Inhibition of the renal  
10 excretion of tazobactam by piperacillin. *J Antimicrob Chemother*. 1994; **34**(4): 555-64.  
11 21. Aronoff GR, Sloan RS, Brier ME, Luft FC. The effect of piperacillin dose on  
12 elimination kinetics in renal impairment. *Eur J Clin Pharmacol*. 1983; **24**(4): 543-7.  
13 22. Martin JH, Fay MF, Udy A, Roberts J, Kirkpatrick C, Ungerer J, et al. Pitfalls of using  
14 estimations of glomerular filtration rate in an intensive care population. *Intern Med J*. 2011.  
15 23. Bagshaw SM, George C, Dinu I, Bellomo R. A multi-centre evaluation of the RIFLE  
16 criteria for early acute kidney injury in critically ill patients. *Nephrol Dial Transplant*. 2008; **23**(4):  
17 1203-10.  
18  
19  
20  
21  
22  
23  
24  
25  
26  
27  
28  
29  
30  
31  
32  
33  
34  
35  
36  
37  
38  
39  
40  
41  
42  
43  
44  
45  
46  
47  
48  
49  
50  
51  
52  
53  
54  
55  
56  
57  
58  
59  
60

**Table 1: Prevalence and duration of kidney organ failure ('Standard exposure' group vs. 'High exposure' group)**

|                                                                                        | 'Standard exposure' group<br>(N=596) | 'High exposure' group<br>(N=604) | p-value |
|----------------------------------------------------------------------------------------|--------------------------------------|----------------------------------|---------|
| <b>EstimatedGFR*:</b>                                                                  |                                      |                                  |         |
| N. days (% of days from day 1 to 28 with values):                                      |                                      |                                  |         |
| Moderately-severely impaired: (eGFR: $\leq 60$ mL/min/1.73 m <sup>2</sup> )            | 3016 (43.4%)                         | 3672 (48.1%)                     | <0.0001 |
| Severely impaired: (eGFR $\leq 30$ mL/min/1.73 m <sup>2</sup> )                        | 1445 (20.8%)                         | 1910 (25.0%)                     | <0.0001 |
| Severely impaired: (eGFR $\leq 30$ mL/min/1.73 m <sup>2</sup> ), days from day 1 to 14 | 984 (20.0%)                          | 1253 (23.5%)                     | <0.0001 |
| <b>'RIFLE' criteria, N patients (%) within day 1 to 28</b>                             |                                      |                                  |         |
| 'R' reached                                                                            | 170 (28.5%)                          | 209 (34.6%)                      | 0.02    |
| 'I' reached                                                                            | 75 (12.6%)                           | 92 (15.2%)                       | 0.19    |
| 'F' reached                                                                            | 121 (20.3%)                          | 150 (24.8%)                      | 0.06    |
| 'R' or death                                                                           | 298 (50.0%)                          | 327 (54.1%)                      | 0.15    |
| 'I' or death                                                                           | 234 (39.3%)                          | 252 (41.7%)                      | 0.39    |
| 'F' or death                                                                           | 270 (45.3%)                          | 287 (47.5%)                      | 0.44    |
| <b>Urea</b>                                                                            |                                      |                                  |         |
| Patients with a urea level ever $\geq 20$ mmol/L (day 1-28); N (%)                     | 217 (37.4%)                          | 253 (43.4%)                      | 0.04    |

\*eGFR was assessed using the Cockcroft and Gault method [Ref: Cockcroft DW, Gault MH.: Prediction of creatinine clearance from serum creatinine. Nephron 1976;16:31-41]. Actual measured creatinin values were used. If using the 'last observation carried forward' approach regarding creatinin measurement to take into account that patients who died in renal failure should be counted as such, did not change the signal or the statistics of these analyses. 'R':Risk, 'I': Injury, 'F': Failure. Presence of renal failure according to 'RIFLE' was assessed using the guidelines developed by the acute dialysis quality initiative ([www.adqi.net](http://www.adqi.net))

**Table 2: Prevalence of kidney organ failure on the last day of follow-up ('Standard exposure' group vs. 'High exposure' group)**

|                                                                                       | 'Standard exposure' group | 'High exposure' group | p-value |
|---------------------------------------------------------------------------------------|---------------------------|-----------------------|---------|
| <b>Survivors and patients who had last creatinine measured &gt;24 h before death:</b> | <b>(N=432)</b>            | <b>(N=438)</b>        |         |
| Renal failure (eGFR: $\leq 60$ mL/min/1.73 m <sup>2</sup> )                           | 119 (27.6%)               | 137 (31.3%)           | 0.23    |
| <b>Patients who died (with last creatinine measured within 24 h before death):</b>    | <b>(N=150)</b>            | <b>(N=145)</b>        |         |
| Renal failure (eGFR: $\leq 60$ mL/min/1.73 m <sup>2</sup> )                           | 105 (70.0%)               | 99 (68.3%)            | 0.83    |
| <b>All patients with creatinine measurements</b>                                      | <b>(N=582)</b>            | <b>(N=583)</b>        |         |
| Renal failure (eGFR: $\leq 60$ mL/min/1.73 m <sup>2</sup> )                           | 224 (38.5)                | 236 (40.5)            | 0.51    |

\*eGFR was assessed using the Cockcroft and Gault method [Ref: Cockcroft DW, Gault MH.: Prediction of creatinine clearance from serum creatinine. Nephron 1976;16:31-41]. Actual measured creatinin values were used.

1  
2  
3  
4  
5  
6  
7  
8  
9  
10  
11  
12  
13  
14  
15  
16  
17  
18  
19  
20  
21  
22  
23  
24  
25  
26  
27  
28  
29  
30  
31  
32  
33  
34  
35  
36  
37  
38  
39  
40  
41  
42  
43  
44  
45  
46  
47  
48  
49  
50  
51  
52  
53  
54  
55  
56  
57  
58  
59  
60

For peer review only

1  
2  
3  
4  
5  
6  
7  
8  
9  
10  
11  
12  
13  
14  
15  
16  
17  
18  
19  
20  
21  
22  
23  
24  
25  
26  
27  
28  
29  
30  
31  
32  
33  
34  
35  
36  
37  
38  
39  
40  
41  
42  
43  
44  
45  
46  
47  
48  
49

For peer review only

**Table 3. Multiple effects models investigating estimated GFR changes after starting and stopping beta-lactam antibiotics**

| Variable                       | Unadjusted analysis                            |                    | Multivariable analysis             |                    |         |
|--------------------------------|------------------------------------------------|--------------------|------------------------------------|--------------------|---------|
|                                | Regression coefficient<br>(95% CI)             | P-value            | Regression coefficient<br>(95% CI) | P-value            |         |
| <b>After starting the drug</b> |                                                |                    |                                    |                    |         |
| Piperacillin/tazobactam        | Per day more on piperacillin/tazobactam        | 1.39 (1.17, 1.60)  | <0.0001                            | 0.99 (0.71, 1.27)  | <0.0001 |
| Meropenem                      | Per day more on meropenem                      | 2.74 (2.39, 3.09)  | <0.0001                            | 2.86 (2.45, 3.28)  | <0.0001 |
| Cefuroxim                      | Per day more on cefuroxim                      | 1.91 (1.67, 2.16)  | <0.0001                            | 1.27 (0.90, 1.64)  | <0.0001 |
| <b>After stopping the drug</b> |                                                |                    |                                    |                    |         |
| Piperacillin/tazobactam        | Per day after stopping piperacillin/tazobactam | 2.79 (2.35, 3.24)  | <0.0001                            | 2.70 (2.26, 3.14)  | <0.0001 |
| Meropenem                      | Per day after stopping meropenem               | 0.20 (-0.51, 0.91) | 0.59                               | 0.17 (-0.52, 0.86) | 0.63    |
| Cefuroxim                      | Per day after stopping cefuroxim               | 0.13 (-0.25, 0.50) | 0.51                               | 0.01 (-0.35, 0.37) | 0.96    |

All multivariable analyses were adjusted for: treatment arm ('low exposure' vs. 'high exposure'), gender, age ( $\geq 65$  vs.  $< 65$  years), APACHE II score ( $\geq 20$  vs.  $< 20$ ), Clinically judged infection (severe sepsis/septic shock vs. milder or no infection), patient category (surgical vs. medical) and eGFR level at administration of the antibiotic, (1:  $< 30$  ml/min/1.73 m<sup>2</sup>, 2: 31-60 ml/min/1.73 m<sup>2</sup>, 3:  $> 60$  ml/min/1.73 m<sup>2</sup>).

**Table 4. Multivariable logistic regression: beta-lactam antibiotics and other risk variables vs. binary endpoint eGFR<60 ml/min/1.73m<sup>2</sup> on day 7.**

| Variable                                              | Unadjusted analysis    |         | Multivariable analysis |         |
|-------------------------------------------------------|------------------------|---------|------------------------|---------|
|                                                       | Odds ratio<br>(95% CI) | P-value | Odds ratio<br>(95% CI) | P-value |
| <b>Other variables</b>                                |                        |         |                        |         |
| Age (≥65 vs. <65 years)                               | 2.36 (1.86, 3.00)      | <0.0001 | 1.85 (1.31, 2.60)      | <0.0001 |
| APACHE II score (≥20 vs. <20)                         | 2.49 (1.90, 3.25)      | <0.0001 | 1.64 (1.12, 2.41)      | 0.01    |
| Severe sepsis/septic shock vs. milder or no infection | 2.02 (1.59, 2.56)      | <0.0001 | 1.16 (0.82, 1.66)      | 0.40    |
| Auto-immune disease (Y vs. N)                         | 1.31 (0.73, 2.33)      | 0.36    | NI                     | -       |
| Cancer (Y vs. N)                                      | 1.26 (0.88, 1.79)      | 0.21    | NI                     | -       |
| Charlson score (≥2 vs. <2)                            | 1.72 (1.35, 2.18)      | <0.0001 | 1.70 (1.21, 2.40)      | 0.002   |
| Surgical (Y vs. N)                                    | 1.16 (0.90, 1.50)      | 0.24    | NI                     | -       |
| Body Mass Index (≥25 vs. <25)                         | 1.57 (1.17, 2.12)      | 0.003   | 1.19 (0.78, 1.82)      | 0.41    |
| Gender (Male vs. Female)                              | 1.25 (0.99, 1.57)      | 0.06    | 1.28 (0.92, 1.78)      | 0.14    |
| eGFR level at baseline                                |                        |         |                        |         |
| >60 ml/min/1,73 m <sup>2</sup>                        | Ref                    | -       | Ref                    | -       |
| 31-60 ml/min/1,73 m <sup>2</sup>                      | 14.6 (10.2, 21.0)      | <0.0001 | 11.7 (8.0, 17.0)       | <0.0001 |
| <30 ml/min/1,73 m <sup>2</sup>                        | 81.1 (51.2, 128.5)     | <0.0001 | 65.9 (40.7, 106.6)     | <0.0001 |
| <b>Beta-lactam antibiotics</b>                        |                        |         |                        |         |
| Piperacillin/tazobactam (≥3 vs. <3 days)*             | 2.32 (1.82, 2.96)      | <0.0001 | 1.70 (1.18, 2.43)      | 0.004   |
| Meropenem (≥3 vs. <3 days)*                           | 0.99 (0.71, 1.37)      | 0.94    | NI                     | -       |
| Cefuroxim (≥3 vs. <3 days)*                           | 0.73 (0.57, 0.94)      | 0.01    | 1.24 (0.85, 1.80)      | 0.26    |

All variables entered in the multivariable analysis were adjusted for the other variables in this model. \*All beta-lactam drug exposures are (≥3 vs. <3 days within the first 7 days in the study). All variables with a p-value <0.2 were included in the multivariable model. NI: Not Included.

1  
2  
3  
4  
5  
6  
7  
8  
9  
10  
11  
12  
13  
14  
15  
16  
17  
18  
19  
20  
21  
22  
23  
24  
25  
26  
27  
28  
29  
30  
31  
32  
33  
34  
35  
36  
37  
38  
39  
40  
41  
42  
43  
44  
45  
46  
47  
48  
49

For peer review only



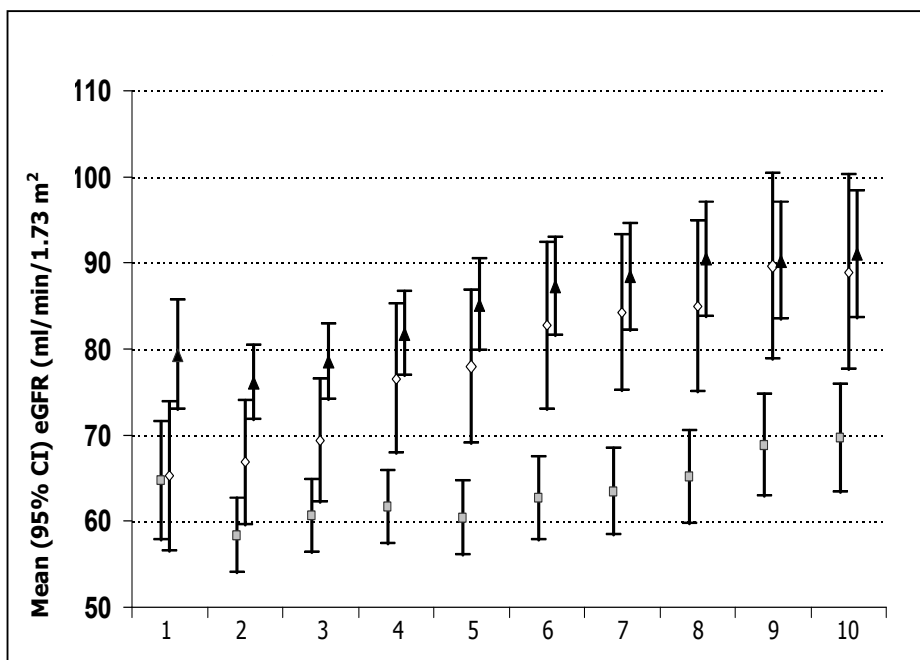

Figure 1. eGFR during ten days on cefuroxim, piperacillin/tazobactam and meropenem. ▲=cefuroxim; ■=piperacillin/tazobactam; ◇=meropenem.

Differences between eGFR in patients receiving piperacillin/tazobactam vs. meropenem: day 1 (p=0.78), day 2 (p=0.18), day 3 (p=0.09), day 4 (p=0.008), day 5 (p=0.001), day 6 (p=0.001), day 7 (p=0.0004), day 8 (p=0.005), day 9 (p=0.006), day 10 (p=0.02).

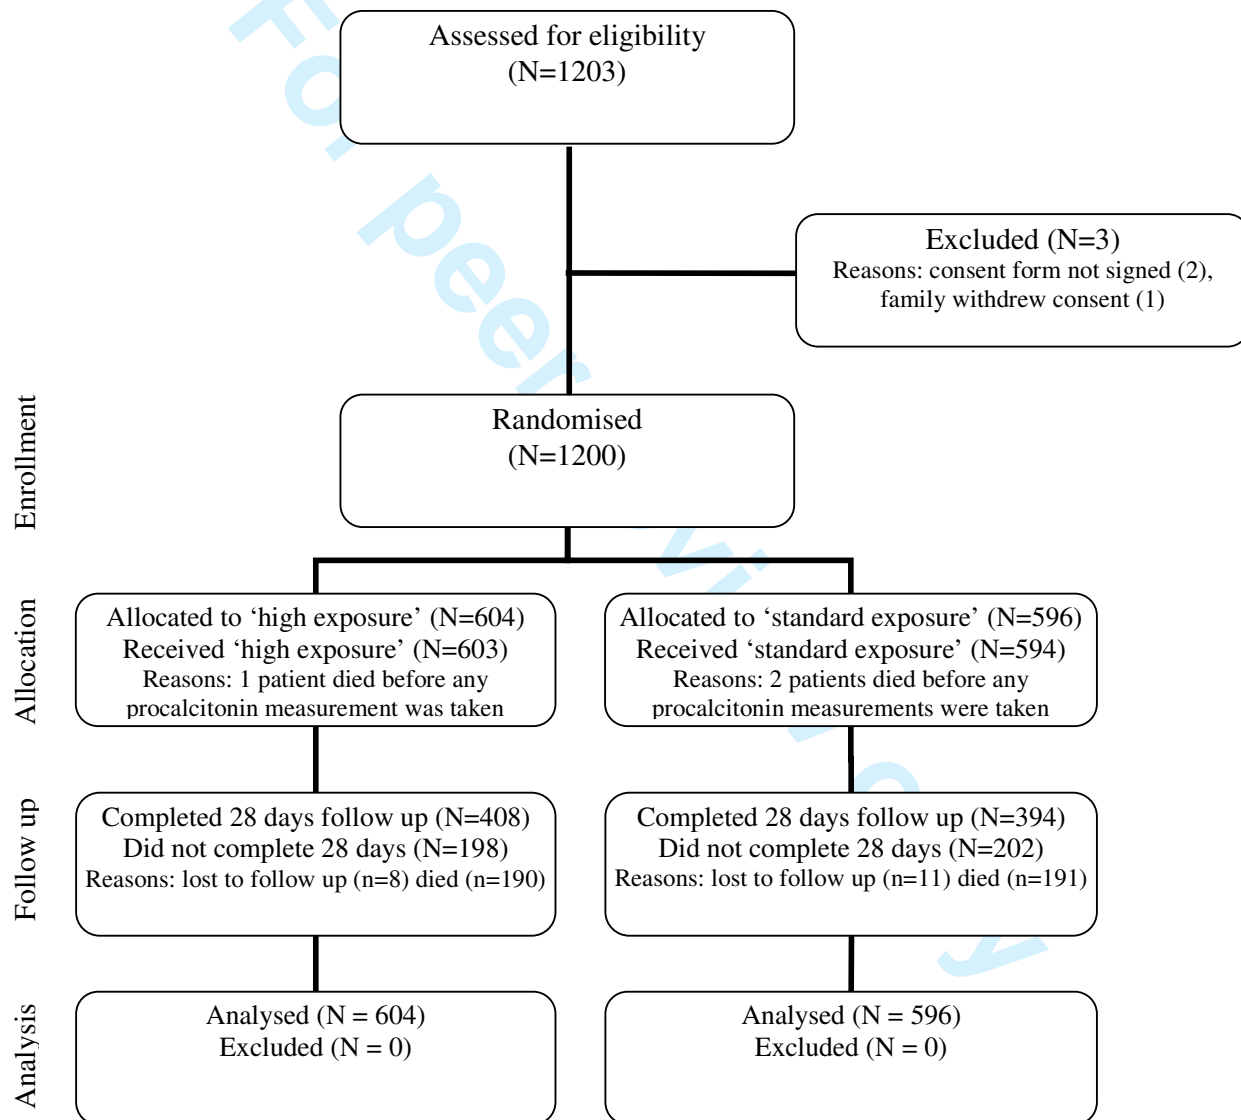

Supplementary Figure 1. Patient Flow Diagram of the trial

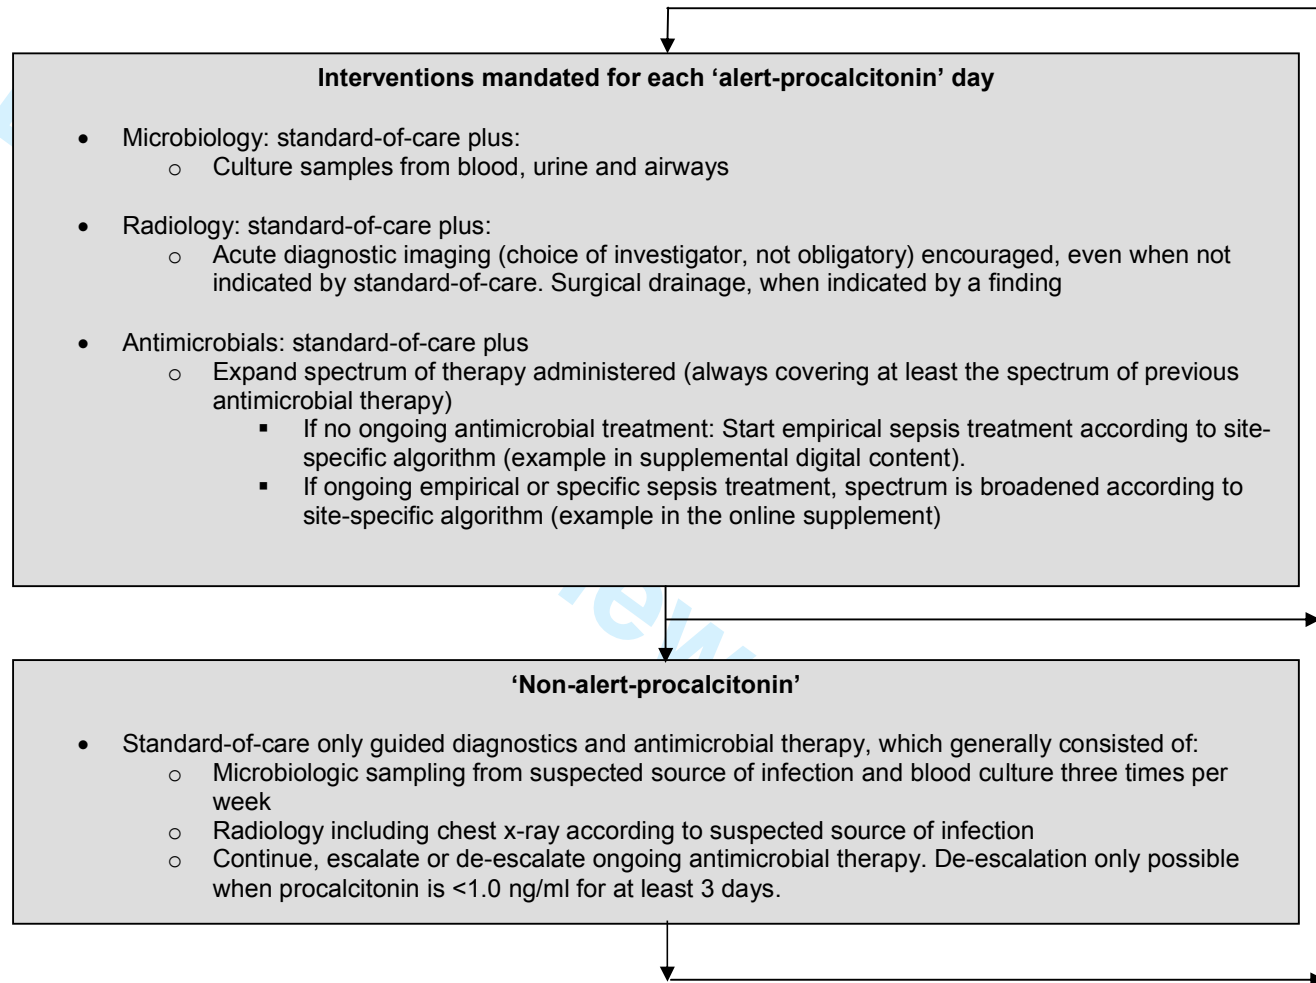

1  
2  
3  
4 Supplementary Figure 1. General principles of procalcitonin-guided intervention.  
5

6 At 'alert-procalcitonin' situation ( $\geq 1.0$  ng/ml and not decreasing by at least 10% from the previous day),  
7 interventions were obligatorily conducted according to an algorithm with specific instructions for  
8 intervention, which was adapted to the antimicrobial guidelines on the site. Antimicrobials were daily  
9 adjusted according to 1) present and previous procalcitonin values, 2) infectious state of the patient (clinical  
10 presentation, microbiology, radiology etc.) and 3) history of antimicrobial use. Procalcitonin-guided  
11 antimicrobial escalation was mandatory, except when 1) there was a clear contra-indication for administering  
12 it or 2) microbiology "explaining the infectious presentation of the patient" was announced (same date)  
13 leading to specific therapy. Standard-of-Care antimicrobial diagnostics and treatment was not waived in the  
14 'high exposure arm (nor the 'standard exposure' arm) to assure patient safety. According to the standard-of-  
15 care principle, all patients with septic shock were treated at the onset of hypotension with antimicrobials  
16 covering >95% of the causes of this condition in our hospitals. Awaiting procalcitonin results/low  
17 procalcitonin levels was not considered a plausible reason to withhold antimicrobial treatment. The treating  
18 physician was reminded daily via phone from the coordinating centre at each 'alert-procalcitonin' to  
19 intervene. In the 'standard exposure' arm, procalcitonin measurements were not available.  
20  
21  
22  
23  
24  
25  
26  
27  
28  
29  
30  
31  
32  
33  
34  
35  
36  
37  
38  
39  
40  
41  
42  
43  
44  
45  
46  
47  
48  
49  
50  
51  
52  
53  
54  
55  
56  
57  
58  
59  
60

**Supplementary Table 1. Baseline characteristics of the study participants.**

|                                                                                                                                                                                                                                                                                                                                                                                                                                                                                                                                                                                                                                                                                                                                                                                                                                                                                                                                        | 'Standard exposure'<br>group (n=596) | 'High exposure'<br>group (n=604) | Overall (n=1200)  |
|----------------------------------------------------------------------------------------------------------------------------------------------------------------------------------------------------------------------------------------------------------------------------------------------------------------------------------------------------------------------------------------------------------------------------------------------------------------------------------------------------------------------------------------------------------------------------------------------------------------------------------------------------------------------------------------------------------------------------------------------------------------------------------------------------------------------------------------------------------------------------------------------------------------------------------------|--------------------------------------|----------------------------------|-------------------|
| Age, years - median (IQR)                                                                                                                                                                                                                                                                                                                                                                                                                                                                                                                                                                                                                                                                                                                                                                                                                                                                                                              | 67 (58–75)                           | 67 (58–76)                       | 67 (58–76)        |
| Male sex – no. (%)                                                                                                                                                                                                                                                                                                                                                                                                                                                                                                                                                                                                                                                                                                                                                                                                                                                                                                                     | 333 (55.9%)                          | 330 (54.6%)                      | 663 (55.3%)       |
| Body Mass Index, kg/m <sup>2</sup> – median (IQR)                                                                                                                                                                                                                                                                                                                                                                                                                                                                                                                                                                                                                                                                                                                                                                                                                                                                                      | 24.7 (22.0–27.8)                     | 25.0 (22.5–28.7)                 | 24.8 (22.2–27.9)  |
| APACHE II Score - median (IQR)                                                                                                                                                                                                                                                                                                                                                                                                                                                                                                                                                                                                                                                                                                                                                                                                                                                                                                         | 18 (13–24)                           | 18 (13–25)                       | 18 (13–24)        |
| <b>Chronic co-morbidity* - no. (%)</b>                                                                                                                                                                                                                                                                                                                                                                                                                                                                                                                                                                                                                                                                                                                                                                                                                                                                                                 |                                      |                                  |                   |
| No chronic co-morbidities                                                                                                                                                                                                                                                                                                                                                                                                                                                                                                                                                                                                                                                                                                                                                                                                                                                                                                              | 102 (17.1)                           | 123 (20.4)                       | 225 (18.8)        |
| <b>Kidney function and electrolytes</b>                                                                                                                                                                                                                                                                                                                                                                                                                                                                                                                                                                                                                                                                                                                                                                                                                                                                                                |                                      |                                  |                   |
| Creatinin, µmol/L - median (IQR)                                                                                                                                                                                                                                                                                                                                                                                                                                                                                                                                                                                                                                                                                                                                                                                                                                                                                                       | 119 (78, 197)                        | 119 (75, 208)                    | 119 (76, 202)     |
| eGFR, mL/min/1.73m <sup>2</sup> – median (IQR)                                                                                                                                                                                                                                                                                                                                                                                                                                                                                                                                                                                                                                                                                                                                                                                                                                                                                         | 51.4 (29.2, 80.5)                    | 49.4 (25.4, 82.6)                | 50.2 (27.1, 81.5) |
| Carbamid, mmol/L - median (IQR)                                                                                                                                                                                                                                                                                                                                                                                                                                                                                                                                                                                                                                                                                                                                                                                                                                                                                                        | 10.3 (6.5, 17.0)                     | 10.6 (6.3, 18.1)                 | 10.5 (6.4, 17.4)  |
| Na <sup>+</sup> , mmol/l - median (IQR)                                                                                                                                                                                                                                                                                                                                                                                                                                                                                                                                                                                                                                                                                                                                                                                                                                                                                                | 138 (134, 141)                       | 137 (134, 141)                   | 138 (134, 141)    |
| K <sup>+</sup> , mmol/l - median (IQR)                                                                                                                                                                                                                                                                                                                                                                                                                                                                                                                                                                                                                                                                                                                                                                                                                                                                                                 | 4.0 (3.7, 4.4)                       | 4.0 (3.6, 4.5)                   | 4.0 (3.6, 4.4)    |
| pH - median (IQR)                                                                                                                                                                                                                                                                                                                                                                                                                                                                                                                                                                                                                                                                                                                                                                                                                                                                                                                      | 7.29 (7.21–7.39)                     | 7.29 (7.20–7.38)                 | 7.29 (7.20–7.38)  |
| Dialysis required, patients (%)                                                                                                                                                                                                                                                                                                                                                                                                                                                                                                                                                                                                                                                                                                                                                                                                                                                                                                        | 88 (14.8%)                           | 86 (14.2%)                       | 174 (14.5%)       |
| <b>Indicators of severity (non-renal)</b>                                                                                                                                                                                                                                                                                                                                                                                                                                                                                                                                                                                                                                                                                                                                                                                                                                                                                              |                                      |                                  |                   |
| Temperature, °C - median (IQR)                                                                                                                                                                                                                                                                                                                                                                                                                                                                                                                                                                                                                                                                                                                                                                                                                                                                                                         | 37.2 (36.4–38.0)                     | 37.3 (36.5–38.1)                 | 37.3 (36.4–38.0)  |
| Mean arterial pressure, mmHg - median (IQR)                                                                                                                                                                                                                                                                                                                                                                                                                                                                                                                                                                                                                                                                                                                                                                                                                                                                                            | 71 (60–84)                           | 72 (63–85)                       | 71 (62–84)        |
| Heart frequency - median (IQR)                                                                                                                                                                                                                                                                                                                                                                                                                                                                                                                                                                                                                                                                                                                                                                                                                                                                                                         | 100 (82–116)                         | 100 (84–117)                     | 100 (83–117)      |
| Need for vasopressor/inotropic drug† - n (%)                                                                                                                                                                                                                                                                                                                                                                                                                                                                                                                                                                                                                                                                                                                                                                                                                                                                                           | 315 (52.9)                           | 326 (53.4)                       | 641 (53.4)        |
| Mechanical ventilation used - n (%)                                                                                                                                                                                                                                                                                                                                                                                                                                                                                                                                                                                                                                                                                                                                                                                                                                                                                                    | 401 (67.3%)                          | 401 (66.4%)                      | 802 (66.8%)       |
| <b>Biomarkers</b>                                                                                                                                                                                                                                                                                                                                                                                                                                                                                                                                                                                                                                                                                                                                                                                                                                                                                                                      |                                      |                                  |                   |
| Alert-PCT § – no. (%)                                                                                                                                                                                                                                                                                                                                                                                                                                                                                                                                                                                                                                                                                                                                                                                                                                                                                                                  | 279 (47.0)                           | 312 (51.7)                       | 591 (49.4)        |
| Leukocytes, x10 <sup>9</sup> – median (IQR)                                                                                                                                                                                                                                                                                                                                                                                                                                                                                                                                                                                                                                                                                                                                                                                                                                                                                            | 13.0 (8.8–18.1)                      | 12.4 (8.0–18.1)                  | 12.8 (8.4–18.1)   |
| C-reactive protein, mg/L – median (IQR)                                                                                                                                                                                                                                                                                                                                                                                                                                                                                                                                                                                                                                                                                                                                                                                                                                                                                                | 131 (40–234)                         | 137 (40–253)                     | 135 (40–241)      |
| Interquartile range (IQR). Acute Physiology and Chronic Health Evaluation II score (APACHE II) ranges from 0 to 71. *Chronic co-morbidity: Earlier diagnosed via hospital admission: heart failure, lung disease, cancer, diabetes, alcohol abuse, chronic infection, neurological disease, renal diseases, liver disease, gastrointestinal disease, autoimmune disease, cancer and psychiatric disorders. †Vasopressors/inotropic drugs are considered to be epinephrine, nor-epinephrine, dopamine and dobutamine. ‡ Infections were rated according to the ACCP/SCCM definitions; investigators were trained in using them. §Alert-PCT: Procalcitonin-level not decreasing by at least 10% from the previous day and above 1.0 ng/ml. If only one measurement is available: Absolute procalcitonin-level above 1.0 ng/ml. A comprehensive baseline table is available in the primary publication from this material <sup>13</sup> . |                                      |                                  |                   |

**Supplementary Table 2. Consumption of antimicrobials during follow-up**

|                                                                       | Standard exposure<br>(n=596) | High exposure<br>(n=604) | p-value |
|-----------------------------------------------------------------------|------------------------------|--------------------------|---------|
| <b>Consumption of antimicrobials</b>                                  |                              |                          |         |
| Pip/tazo used within 28 days (DDD)                                    | 1893                         | 2925                     | -       |
| Proportion of days <sup>a</sup> followed where Pip/tazo was used      | 0.00 (0.00 – 0.33)           | 0.11 (0.00 – 0.56)       | <0.001  |
| Meropenem used within 28 days (DDD)                                   | 2174                         | 2480                     | -       |
| Proportion of days <sup>a</sup> followed where meropenem was used     | 0.00 (0.00 – 0.00)           | 0.00 (0.00 – 0.07)       | 0.23    |
| Cefuroxim used within 28 days (DDD)                                   | 4369                         | 3390                     | -       |
| Proportion of days <sup>a</sup> followed where cefuroxim was used     | 0.11 (0.00 – 0.39)           | 0.04 (0.00 – 0.29)       | <0.001  |
| Ciprofloxacin used within 28 days (DDD)                               | 6210                         | 8382                     | -       |
| Proportion of days <sup>a</sup> followed where ciprofloxacin was used | 0.21 (0.00 – 0.71)           | 0.33 (0.04 – 0.88)       | <0.001  |
| Number (%) ICU days spent with at least three antimicrobials          | 2721 (57.7%)                 | 3570 (65.5%)             | 0.002   |

ICU: Intensive care unit. <sup>a</sup>This comparison was made with complete follow-up for 28 days (if patients were discharged from ICU, they were followed for antimicrobial use in all hospital admissions in Denmark).

Pip/tazo: piperacillin/tazobactam. DDD: Defined Daily Dose administered within day 1-28. Parts of this table is also available in the primary publication on this material<sup>13</sup>. It is included in the present report since it is crucial for interpretation of the results.

1  
2  
3  
4  
5  
6  
7  
8  
9  
10  
11  
12  
13  
14  
15  
16  
17  
18  
19  
20  
21  
22  
23  
24  
25  
26  
27  
28  
29  
30  
31  
32  
33  
34  
35  
36  
37  
38  
39  
40  
41  
42  
43  
44  
45  
46  
47  
48  
49  
50  
51  
52  
53  
54  
55  
56  
57  
58  
59  
60

For peer review only

1  
2  
3  
4  
5  
6  
7  
8  
9  
10  
11  
12  
13  
14  
15  
16  
17  
18  
19  
20  
21  
22  
23  
24  
25  
26  
27  
28  
29  
30  
31  
32  
33  
34  
35  
36  
37  
38  
39  
40  
41  
42  
43  
44  
45  
46  
47  
48  
49

For peer review only



Supplementary table 3: Cox proportional hazards models investigating predictors of mortality after ten days

| Variable                                                                         | Unadjusted analysis      |            | Multivariable analysis   |            |
|----------------------------------------------------------------------------------|--------------------------|------------|--------------------------|------------|
|                                                                                  | Hazard ratio<br>(95% CI) | P-value    | Hazard ratio<br>(95% CI) | P-value    |
| Treatment arm ('High exposure vs. 'Standard exposure)                            | 0.97 (0.72, 1.31)        | 0.86       | 0.93 (0.69, 1.26)        | 0.63       |
| Hospital:                                                                        |                          |            |                          |            |
| 1                                                                                | Ref                      | 0.11       | Ref                      | 0.37       |
| 2                                                                                | 0.63 (0.19, 2.05)        |            | 0.50 (0.15, 1.66)        |            |
| 3                                                                                | 0.54 (0.17, 1.75)        |            | 0.49 (0.15, 1.63)        |            |
| 4                                                                                | 0.86 (0.26, 2.81)        |            | 0.65 (0.19, 2.21)        |            |
| 5                                                                                | 0.56 (0.16, 1.88)        |            | 0.45 (0.13, 1.56)        |            |
| 6                                                                                | 0.71 (0.21, 2.37)        |            | 0.63 (0.18, 2.12)        |            |
| 7                                                                                | 0.79 (0.23, 2.72)        |            | 0.66 (0.18, 2.40)        |            |
| 8                                                                                | 0.43 (0.11, 1.53)        |            | 0.34 (0.09, 1.26)        |            |
| 9                                                                                | 0.23 (0.05, 1.02)        |            | 0.27 (0.06, 1.26)        |            |
| Gender (Female vs. Male)                                                         | 0.80 (0.59, 1.08)        | 0.14       | 0.77 (0.57, 1.05)        | 0.10       |
| Age ( $\geq 65$ years vs. $< 65$ years)                                          | 1.96 (1.42, 2.69)        | $< 0.0001$ | 1.86 (1.34, 2.58)        | $< 0.0001$ |
| APACHE II score ( $\geq 20$ vs. $< 20$ )                                         | 1.77 (1.31, 2.39)        | $< 0.0001$ | 1.35 (0.98, 1.87)        | 0.07       |
| Infection at baseline (Severe Sepsis or septic shock vs Milder or no infection)  | 1.31 (0.97, 1.76)        | 0.08       | 1.17 (0.84, 1.64)        | 0.35       |
| Surgical patient (Yes vs. No)                                                    | 0.78 (0.57, 1.06)        | 0.11       | 0.76 (0.55, 1.05)        | 0.09       |
| Date recruited (01/01/08 to 02/06/09 vs. 09/01/06 to 31/12/07)                   | 1.11 (0.81, 1.53)        | 0.50       | 1.18 (0.84, 1.67)        | 0.34       |
| eGFR ever $< 30$ mL/min/1.73 m <sup>2</sup> over the first ten days (Yes vs. No) | 1.81 (1.34, 2.45)        | $< 0.0001$ | 1.47 (1.06, 2.04)        | 0.02       |

1  
2  
3  
4  
5  
6  
7  
8  
9  
10  
11  
12  
13  
14  
15  
16  
17  
18  
19  
20  
21  
22  
23  
24  
25  
26  
27  
28  
29  
30  
31  
32  
33  
34  
35  
36  
37  
38  
39  
40  
41  
42  
43  
44  
45  
46  
47  
48  
49

**Table T1: Cox proportional hazards models investigating predictors of 28 day ‘all cause’ mortality**

| Variable                                                  | Unadjusted analysis      |         | Multivariable analysis   |         |
|-----------------------------------------------------------|--------------------------|---------|--------------------------|---------|
|                                                           | Hazard ratio<br>(95% CI) | P-value | Hazard ratio<br>(95% CI) | P-value |
| Gender (Male vs. Female)                                  | 1.11 (0.90, 1.35)        | 0.34    | NI                       | -       |
| Age (≥65 years vs. <65 years)                             | 2.04 (1.64, 2.54)        | <0.0001 | 1.84 (1.47, 2.30)        | <0.0001 |
| APACHE II score (≥25 vs. <25)                             | 1.89 (1.53, 2.33)        | <0.0001 | 1.46 (1.17, 1.82)        | 0.001   |
| Severe Sepsis/septic shock vs. Milder or no infection)    | 1.41 (1.15, 1.72)        | 0.001   | 1.28 (1.04, 1.58)        | 0.02    |
| Surgical patient (Yes vs. No)                             | 0.66 (0.52, 0.85)        | 0.001   | 0.64 (0.50, 0.82)        | 0.001   |
| Cancer (Yes vs. No)                                       | 1.14 (0.85, 1.55)        | 0.38    | NI                       | -       |
| Charlson score (≥2 vs. <2)                                | 1.46 (1.19, 1.80)        | <0.0001 | 1.43 (1.14, 1.81)        | 0.002   |
| eGFR <60 mL/min/1.73 m <sup>2</sup> on day 7 (Yes vs. No) | 2.14 (1.74, 2.63)        | <0.0001 | 1.65 (1.33, 2.05)        | <0.0001 |

eGFR: estimated glomerular filtration rate; APACHE II: Acute Physiology And Chronic Health Evaluation II; NI: Not Included. Forward censoring was applied and variables with p<0.2 in the univariate analysis were entered into the multivariate model.

**Diagram D1 Example of the site-specific interventional algorithm, site ‘Aarhus’**

**The Procalcitonin And Survival Study (PASS) Intervention Algorithm, Site: Aarhus**

IMPORTANT: All patients shall (at least) receive antimicrobial therapy covering "standard-of-care", i.e. if any existing guidelines or evidence for antimicrobial treatment indicate/ contra-indicate surgical and/or antibiotic treatment, then the patient should be treated according to this. Indicated treatment should never be left out because of a possibly low procalcitonin (PCT).

All (except for the above standing situations) patients in the "PCT intervention" group must have treatment according to the present guidelines, including interventions when procalcitonin is  $\geq 1,0$  ng/ml and "Alert"<sup>a</sup>.

Patients are categorized daily according to the PASS intervention categories, on the basis on the present and the previous PCT measurement (displayed as "Alert" or "Non-Alert" in the website). In correspondence with every category, a PASS-intervention is displayed below. The treatment is, adjusted according to new and relevant microbiology that "explains" the clinical picture

|                   |                                                                                                                                                                                                                                                        |
|-------------------|--------------------------------------------------------------------------------------------------------------------------------------------------------------------------------------------------------------------------------------------------------|
| <b>CATEGORY 1</b> | First PCT > 1,0 ng/ml, patient has not received antibiotics ( $\geq 1$ DDD <sup>b</sup> within 72 h)                                                                                                                                                   |
| <b>CATEGORY 2</b> | A) First PCT $\geq 1,0$ ng/ml, patient has received antibiotics ( $\geq$ DDD <sup>b</sup> within 72 h)<br>or<br>B) PCT "Alert" for 1 day after CAT 1, CAT 4 or CAT 5 has been started<br>or<br>C) PCT "Alert"*** from "start-sample" till next morning |
| <b>CATEGORY 3</b> | A) First PCT $\geq 1,0$ ng/ml, patient has received antibiotics ( $\geq$ DDD <sup>b</sup> within 72 h) and clinical suspicion of fungal infection or catheter related infection.<br>or<br>B) PCT "Alert" for 1 day after CAT 2 has been started        |
| <b>CATEGORY 4</b> | A) Start PCT < 1,0 ng/ml<br>or<br>B) "Non-Alert" PCT, but $\geq 1,0$ ng/ml.<br>or<br>C) PCT < 1,0 for 1-2 days                                                                                                                                         |
| <b>CATEGORY 5</b> | PCT < 1,0 ng/ml for 3 or more days.                                                                                                                                                                                                                    |

| Action            | Diagnostics                                                                                                                                                                                                                                                   | Surgery                                               | Antimicrobials <sup>c</sup>                                                                                                                                                                                                                                                                          |
|-------------------|---------------------------------------------------------------------------------------------------------------------------------------------------------------------------------------------------------------------------------------------------------------|-------------------------------------------------------|------------------------------------------------------------------------------------------------------------------------------------------------------------------------------------------------------------------------------------------------------------------------------------------------------|
| <b>CATEGORY 1</b> | <ul style="list-style-type: none"> <li>Blood culture</li> <li>Tracheal secretion</li> <li>Urine culture</li> <li>Culture from susp. source</li> <li>Diagnostic imaging of susp. source</li> </ul>                                                             | According to diagnostic imaging and clinical judgment | <ol style="list-style-type: none"> <li>Cefuroxim 1500 mg x 3 i.v. or Ampicillin 1g x 4 / 2 g x 3 i.v.</li> <li>Ciprofloxacin 400 mg x 2 i.v.</li> <li>Consider: Metronidazol 500 mg x 2 i.v.</li> </ol>                                                                                              |
| <b>CATEGORY 2</b> | <ul style="list-style-type: none"> <li>Blood culture</li> <li>Tracheal secretion</li> <li>Urine culture</li> <li>Culture from susp. source</li> <li>Diagnostic imaging of susp. source</li> </ul>                                                             | According to diagnostic imaging and clinical judgment | <ol style="list-style-type: none"> <li>Pip/Tazo<sup>d</sup> 4gx3 iv or Meropenem 1gx3 iv</li> <li>Ciprofloxacin 400 mg x 2 i.v.</li> <li>Metronidazol 500 mg x 2 i.v.</li> <li>Consider fungal infection: Fluconazole i.v. and cath. inf: Vancomycin, dosage acc.to. Se-Vanco<sup>e</sup></li> </ol> |
| <b>CATEGORY 3</b> | <ul style="list-style-type: none"> <li>Blood culture</li> <li>Tracheal secretion</li> <li>Urine culture</li> <li>Culture from susp. source</li> <li>Diagnostic imaging of susp. source</li> <li>Renewing oldest diagnostic imaging of susp. source</li> </ul> | According to diagnostic imaging and clinical judgment | <ol style="list-style-type: none"> <li>Pip/Tazo<sup>d</sup> 4gx3 iv or Meropenem 1gx3 iv</li> <li>Ciprofloxacin 400 mg x 2 i.v.</li> <li>Metronidazol 500 mg x 2 i.v.</li> <li>Fluconazol 400 mg x 2 i.v.</li> <li>Vancomycin, dosage acc.to. Se-Vanco<sup>e</sup></li> </ol>                        |
| <b>CATEGORY 4</b> | Nothing further                                                                                                                                                                                                                                               | Standard-of-care approach                             | Continue present treatment                                                                                                                                                                                                                                                                           |
| <b>CATEGORY 5</b> | Nothing further                                                                                                                                                                                                                                               | Standard-of-care approach                             | Re-consider the indication for antibiotics (standard-of-care principle)                                                                                                                                                                                                                              |

<sup>a</sup> 'Alert PCT' is defined as PCT-day1  $\geq$  PCT day 0 x 0.9. So a decrease in PCT from 11,2 ng/ ml to 10,5 ng/ ml is an "irrelevant decrease" and is defined as an "Alert" PCT. <sup>b</sup> DDD = Defined Daily Dosages). N.B.: The mentioned dosages are examples. Dosing regimen and frequency is prescribed according to the department guidelines (according to weight, kidney function, haemodialysis, Continuous dialysis etc.). <sup>c</sup>Antimicrobial spectrum covered can be broader than suggested (discretion of investigator). Administration of antimicrobials with a narrower spectrum on Alert-PCT days, should only take place when any antimicrobial treatment covering the suggested spectrum is contra-indicated and such a therapy should always be discussed and accepted by the coordinating centre. <sup>d</sup>Pip/Tazo: piperacillin/tazobactam. <sup>e</sup>Se-Vanco: serum-vancomycin measurements

**Diagram D2:****Meta-analysis of randomized trials using piperacillin-containing regimens exploring renal failure****Results:**

- In the initial identification phase, four ICU studies were found: They were excluded, since A) only a (non-defined) part of the patients received piperacillin(8), B) Both groups received piperacillin(9), C) one or both groups received aminoglycosides concomitantly(10, 11) .
- In the 7 (non-ICU) trials eventually included, 1592 episodes of therapy were observed.
- 21 cases of renal failure (not defined) occurred, corresponding to 1.3%.
- Hypothesizing, that the incidence of renal failure is 0.5% in non-piperacillin containing beta-lactam therapies, and aiming to find a risk increase to totally 1.5% (relative risk of 3.0), using conventional type I risk limit of 5% and a power of 80%, the sample size for such a trial investigating this should be approx. 3300 patients (non-ICU setting).
- In an ICU setting, the incidence of renal failure is often >20%. A trial of 1000 patients would be able to detect a risk increase to 28% (Relative risk:1.4) from e.g. piperacillin

\*All articles were reviewed for this. Additionally, in adobe documents with the search option (those not scanned), a search was made in each pdf document with search terms: “renal”, “kidney”, “nephro”, “creatinine” and “gfr”. More than the noted 25 of the articles did not report renal failure, however, if they fulfilled one or more of the other exclusion criteria, they were excluded because of this.

## References (for meta-analysis)

1. Anaissie EJ, Fainstein V, Bodey GP, et al. Randomized trial of beta-lactam regimens in febrile neutropenic cancer patients. *Am J Med.* 1988; 84: 581-9.
2. Winston DJ, Ho WG, Bruckner DA, et al. Beta-lactam antibiotic therapy in febrile granulocytopenic patients. A randomized trial comparing cefoperazone plus piperacillin, ceftazidime plus piperacillin, and imipenem alone. *Ann Intern Med.* 1991; 115: 849-59.
3. Schmitt DV, Leitner E, Welte T, et al. Piperacillin/tazobactam vs imipenem/cilastatin in the treatment of nosocomial pneumonia--a double blind prospective multicentre study. *Infection.* 2006; 34: 127-34.
4. Dela Pena AS, Asperger W, Kockerling F, et al. Efficacy and safety of ertapenem versus piperacillin-tazobactam for the treatment of intra-abdominal infections requiring surgical intervention. *J Gastrointest Surg.* 2006; 10: 567-74.
5. Philpott-Howard J, Burroughs A, Fisher N, et al. Piperacillin-tazobactam versus ciprofloxacin plus amoxicillin in the treatment of infective episodes after liver transplantation. *J Antimicrob Chemother.* 2003; 52: 993-1000.
6. Marra F, Reynolds R, Stiver G, et al. Piperacillin/tazobactam versus imipenem: a double-blind, randomized formulary feasibility study at a major teaching hospital. *Diagn Microbiol Infect Dis.* 1998; 31: 355-68.
7. Bohme A, Just-Nubling G, Bergmann L, et al. A randomized study of imipenem compared to cefotaxime plus piperacillin as initial therapy of infections in granulocytopenic patients. *Infection.* 1995; 23: 349-55.
8. Combes A, Luyt CE, Fagon JY, et al. Impact of piperacillin resistance on the outcome of Pseudomonas ventilator-associated pneumonia. *Intensive Care Med.* 2006; 32: 1970-8.
9. Rafati MR, Rouini MR, Mojtahedzadeh M, et al. Clinical efficacy of continuous infusion of piperacillin compared with intermittent dosing in septic critically ill patients. *Int J Antimicrob Agents.* 2006; 28: 122-7.
10. Alvarez-Lerma F, Insausti-Ordenana J, Jorda-Marcos R, et al. Efficacy and tolerability of piperacillin/tazobactam versus ceftazidime in association with amikacin for treating nosocomial pneumonia in intensive care patients: a prospective randomized multicenter trial. *Intensive Care Med.* 2001; 27: 493-502.
11. Brun-Buisson C, Sollet JP, Schweich H, et al. Treatment of ventilator-associated pneumonia with piperacillin-tazobactam/amikacin versus ceftazidime/amikacin: a multicenter, randomized controlled trial. VAP Study Group. *Clin Infect Dis.* 1998; 26: 346-54.

**PASS-II**25<sup>th</sup> Aug 2010**Antibiotics and Renal Organ Failure – secondary endpoints from the Procalcitonin And Survival Study - analysis plan****1. Consort Flow Diagram (done in PASS-1)**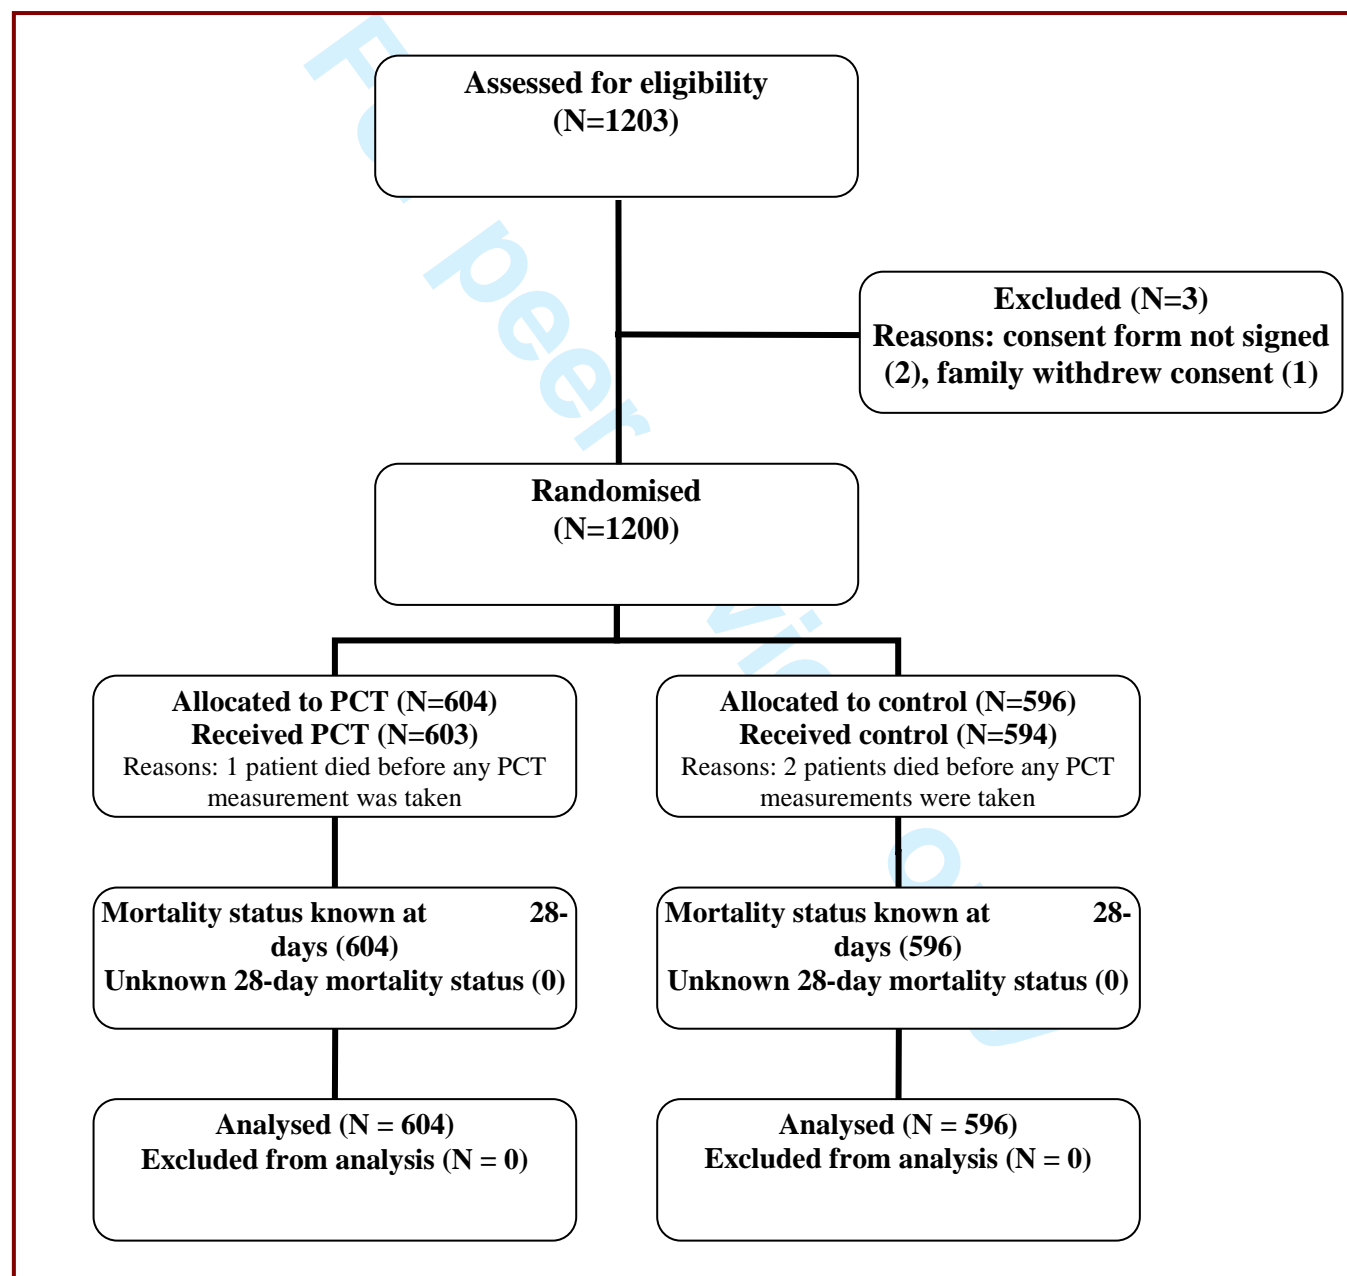

Trial profile.

**2. Baseline characteristics**

Table 1: Baseline characteristics

|                                                                  | Standard-of-care-only | Procalcitonin-guided | Overall          |
|------------------------------------------------------------------|-----------------------|----------------------|------------------|
|                                                                  | <u>n=596</u>          | <u>n=604</u>         | <u>n=1200</u>    |
| Age (Yr.) Median (IQR)                                           | 67 (58–75)            | 67 (58–76)           | 67 (58–76)       |
| Male sex – no. (%)                                               | 333 (55.9%)           | 330 (54.6%)          | 663 (55.3%)      |
| Body Mass Index – Median kg/m <sup>2</sup> (IQR)                 | 24.7 (22.0–27.8)      | 25.0 (22.5–28.7)     | 24.8 (22.2–27.9) |
| APACHE II Score - Median (IQR)                                   | 18 (13–24)            | 18 (13–25)           | 18 (13–24)       |
| Surgical patient – no. (%)                                       | 260 (43.6)            | 227 (37.6)           | 487 (40.6)       |
| <b>Chronic co-morbidity* - no. (%)</b>                           |                       |                      |                  |
| No chronic co-morbidities                                        | 102 (17.1)            | 123 (20.4)           | 225 (18.8)       |
| 1 chronic co-morbidities                                         | 279 (46.8)            | 257 (42.6)           | 536 (44.7)       |
| 2 chronic co-morbidities                                         | 173 (29.0)            | 171 (28.3)           | 344 (28.7)       |
| ≥3 chronic co-morbidities                                        | 42 (7.1)              | 53 (8.8)             | 95 (7.9)         |
| <b>Acute illness/reason for admittance to ICU – no. (%)</b>      |                       |                      |                  |
| Central nervous system incl. Unconsciousness                     | 78 (13.1)             | 101 (16.7)           | 179 (14.9)       |
| Respiratory failure                                              | 422 (70.8)            | 410 (67.9)           | 832 (69.3)       |
| Circulatory failure                                              | 263 (44.1)            | 257 (42.6)           | 520 (43.3)       |
| Gastro-intestinal disease                                        | 128 (21.5)            | 96 (15.9)            | 224 (18.7)       |
| Renal disease                                                    | 81 (13.6)             | 103 (17.1)           | 184 (15.3)       |
| Post-operative complications                                     | 123 (20.6)            | 106 (17.6)           | 229 (19.1)       |
| Trauma                                                           | 113 (19.0)            | 106 (17.6)           | 219 (18.3)       |
| Other                                                            | 68 (11.4)             | 57 (9.4)             | 125 (10.4)       |
| <b>Indicators of severity</b>                                    |                       |                      |                  |
| Temperature, °C (median (IQR), n=1136)                           | 37.3 (36.3–38.1)      | 37.4 (36.4–38.3)     | 37.3 (36.3–38.2) |
| Mean arterial pressure, mmHg (median (IQR) n=1195)               | 71 (60–84)            | 72 (63–85)           | 71 (62–84)       |
| Heart frequency (median (IQR) n=1197)                            | 100 (82–116)          | 100 (84–117)         | 100 (83–117)     |
| Need for vasopressor/inotropic drug <sup>†</sup> (% , n=1200)    | 315 (52.9)            | 326 (53.4)           | 641 (53.4)       |
| PaO <sub>2</sub> /PaCO <sub>2</sub> ratio (median (IQR), n=1178) | 1.85 (1.27–2.62)      | 1.82 (1.29–2.53)     | 1.83 (1.28–2.59) |
| pH (median (IQR) n=1185)                                         | 7.29 (7.21–7.39)      | 7.29 (7.20–7.38)     | 7.29 (7.20–7.38) |
| Mechanical ventilation used (% , n=1200)                         | 401 (67.3%)           | 401 (66.4%)          | 802 (66.8%)      |
| Creatinine μmol/L (median (IQR) n=1167)                          | 119 (78–197)          | 119 (75–208)         | 119 (76–202)     |
| Dialysis required (% , n=1200)                                   | 88 (14.8%)            | 86 (14.2%)           | 174 (14.5)       |
| Bilirubin, μmol/L (median (IQR) n=1109)                          | 10 (6–17)             | 10 (5–18)            | 10 (5–17)        |
| <b>Infection, clinical assessment ‡ – no. (%)</b>                |                       |                      |                  |
| No infection                                                     | 118 (19.8)            | 86 (14.2)            | 204 (17.0)       |
| Localized infection or Sepsis                                    | 266 (44.6)            | 271 (44.9)           | 537 (44.8)       |
| Severe sepsis/ septic Shock                                      | 212 (35.6)            | 247 (40.9)           | 459 (38.3)       |
| <b>Site of infection § – no. (%)</b>                             |                       |                      |                  |
| CNS                                                              | 12 (2.0)              | 35 (5.8)             | 47 (3.9)         |
| Respiratory                                                      | 292 (50.0)            | 324 (53.6)           | 616 (51.3)       |
| Gastrointestinal                                                 | 149 (25.0)            | 145 (24.0)           | 294 (24.5)       |
| Urinary                                                          | 28 (4.7)              | 42 (7.0)             | 70 (5.8)         |
| Other                                                            | 52 (8.7)              | 41 (6.8)             | 93 (7.8)         |
| <b>Biomarkers</b>                                                |                       |                      |                  |
| Alert-PCT    – no. (%)                                           | 279 (47.0)            | 312 (51.7)           | 591 (49.4)       |
| Leukocytes, x10 <sup>9</sup> – median (IQR)                      | 13.0 (8.8–18.1)       | 12.4 (8.0–18.1)      | 12.8 (8.4–18.1)  |
| C-reactive protein, mg/L – median (IQR)                          | 152 (54–266)          | 161 (56–271)         | 157 (56–271)     |

1 Interquartile range (IQR). Acute Physiology and Chronic Health Evaluation II score (APACHE II) ranges from 0 to 71. \*Chronic co-  
2 morbidity: Earlier diagnosed via hospital admission: heart failure, lung disease, cancer, diabetes, alcohol abuse, chronic infection,  
3 neurological disease, renal diseases, liver disease, gastro-intestinal disease, autoimmune disease, cancer and psychiatric disorders.  
4 Acute illness: persons can have several. 'Other' includes liver disease, haemorrhage, haematological disease and poisoning.  
5 †Vasopressors/inotropic drugs are considered to be epinephrine, nor-epinephrine, dopamine and dobutamine. ‡ Infections were rated  
6 according to the ACCP/SCCM definitions; investigators were trained in using them. § Site of infection: patients can have more than  
7 one. ||Alert-PCT: Procalcitonin-level not decreasing by at least 10% from the previous day and above 1.0 ng/ml. If only one  
8 measurement is available: Absolute procalcitonin-level above 1.0 ng/ml.  
9  
10  
11

12 **Table 1. Baseline characteristics of the study participants.**  
13  
14  
15  
16  
17  
18  
19  
20  
21  
22  
23  
24  
25  
26  
27  
28  
29  
30  
31  
32  
33  
34  
35  
36  
37  
38  
39  
40  
41  
42  
43  
44  
45  
46  
47  
48  
49  
50  
51  
52  
53  
54  
55  
56  
57  
58  
59  
60

For peer review only



**Table 2: Follow up characteristics**

| Follow up measurement                                                                                                                                                                              | Control group<br>(N=596) | PCT-guided group<br>(N=604) | Overall<br>(n=1200) |
|----------------------------------------------------------------------------------------------------------------------------------------------------------------------------------------------------|--------------------------|-----------------------------|---------------------|
| Patients followed and alive for 28 days (N., %)                                                                                                                                                    |                          |                             |                     |
| Patients followed for 28 days (incl. those who died in the first 28 days) (N., %)                                                                                                                  |                          |                             |                     |
| Status at 28 days (n = ):<br>Alive<br>Dead                                                                                                                                                         |                          |                             |                     |
| Days spent in ICU      Median (IQR) (as in PASS-I)                                                                                                                                                 |                          |                             |                     |
| Days spent in Danish hospital within 28 days      Median (IQR)                                                                                                                                     |                          |                             |                     |
| Patients with a complete 28 day follow up for respiratory failure (mech. Vent., PaO2 and FiO2)                                                                                                     |                          |                             |                     |
| Days followed within 28 days for respiratory failure (mech. Vent, PaO2 and FiO2) of total days in trial ((denom. = 604 x 28) this can be drawn from the admission list in combination w. database) |                          |                             |                     |
| Patients with 28 day follow up for renal failure (dialysis – same as prev.)                                                                                                                        |                          |                             |                     |
| Days followed within 28 days for renal failure ( <u>dialysis</u> ) of total days in trial (denominator = 604 x 28 and 596 x 28 days) (same as prev.)                                               |                          |                             |                     |
| Patients with 28 day follow up for renal failure (eGFR)                                                                                                                                            |                          |                             |                     |
| Days followed within 28 days for renal failure ( <u>eGFR</u> ) of total days in trial (denominator = 604 x 28 and 596 x 28 days)                                                                   |                          |                             |                     |
| Patients with 28 day follow up for Platelets                                                                                                                                                       |                          |                             |                     |
| Patients with 28 day follow up for Bilirubin                                                                                                                                                       |                          |                             |                     |
| Patients with 28 day follow up for antibiotic consumption                                                                                                                                          |                          |                             |                     |

n\*s refers to the total number of patients who had follow up for 28 days.  
**28-day follow up is: Follow up until death within 28 days OR until day 28. For respiratory failure follow up is done for all ICU admissions. For renal failure, follow up is done for all dialysis treatment (ICU+other dialysis competent hospital units) and for all creatinine and carbamide measurements performed within 28 days (ICU + non-ICU admissions). For platelets and bilirubin, follow up is done for all measurements performed within 28 days (ICU + non-ICU admissions)**

**STRATIFICATION (\*S) / test for interaction: (regarding the below analyses in Section 2 + 3)**

1. Age (limit initially 65 y, if significant interaction, more age groups)
2. APACHE II score (limit initially 20, if significant interaction, more APACHE II groups,
3. Site 1-9.
4. Severe Sepsis/septic Shock vs. Milder or No infection at Baseline
5. Calendar date of inclusion into PASS. Recruited: 9<sup>th</sup> Jan 2006 – 31<sup>st</sup> December 2007 (~430 patients) vs. 1<sup>st</sup> of Jan 2008 – 2<sup>nd</sup> of June 2009 (~770 patients).
6. Surgical patient / medical patient [Surgical = All patients with mark in Baseline “B6”, or “B12” or marked “Yes” in “L”]
7. Gender

## **SECTION 2. Exposure – Antibiotic usage**

Follow up: All patients were followed up regarding antibiotic consumption: 1) In the ICU in the primary PASS-CRF, 2) All ICU-surviving patients, not staying in the ICU for 28 days, were followed up for antibiotic consumption in the non-ICU, they were discharged to after ICU.

General: The aims of these analyses are to investigate the impact of performing PCT-guided empiric antibiotic interventions according to a progressive algorithm on the consumption of antibiotics. This is to be illustrated by analyses exploring 1) spectrum, 2) quantity and 3) duration of therapy in the two arms.

### **The aim is:**

- a) To investigate the difference in exposure in general to antibiotics in the two arms of the PASS trial and more specifically to broad-spectrum antibiotics.

### **This is done in the following analyses (PCT vs. Control):**

- 1) The total number of days within the 28 day follow-up period with any antibiotic treatment (or proportion of follow-up time): [Not done Yet]
- 2) The total consumption of any antibiotic in weight (grams within 28 days) [Not done Yet]
- 3) The total consumption per ICU day of any antimicrobial [DONE]
- 4) The total consumption of betalactam drugs active against most Extended Spectrum Beta-lactamases and wild-type *Pseudomonas aeruginosa* (a. Meropenem and other pseudomonas active carbapenems, OR b. Piperacillin/tazobactam OR c. 4.generation Cephalosporins). [or proportion of days in these treatments] [Not done Yet]
- 5) The total no. of days within the 28-day follow up period with treatment with any flour-quinolone (ciprofloxacin, moxifloxacin and others) [or proportion of days in these treatments] [Not done Yet]
- 6) The total no. of days within the 28-day follow up period with treatment with any glycopeptide (Vancomycin, Teicoplanin) [or proportion of days in these treatments] [Not done Yet]
- 7) The total no. of days within the 28-day follow up period with treatment with fluconazole [or proportion of days in these treatments] [Not done Yet]

### **Consumption of antimicrobials in the intensive care unit**

|                                                                       |                    |                    |                      |        |
|-----------------------------------------------------------------------|--------------------|--------------------|----------------------|--------|
| Length of antimicrobial treatment in ICU, days (median, IQR)          | 4 (3– 10)          | 6 (3– 11)          | -                    | 0.001  |
| Quantity of antimicrobials administered per ICU day (g) (median, IQR) | 6.7g (4.5g– 12.5g) | 8.6g (5.3g– 13.7g) | -                    | <0.001 |
| Number (%) ICU days spent with at least three antimicrobials          | 2721 (57.7%)       | 3570 (65.5%)       | -7.9% (-9.7%– -6.0%) | 0.002  |

\*Counted from the time of sampling. Only samples later to become positive. Cultures with coagulase negative staphylococci, corynebacteria and propionebacteria are not included. † Including localised infection, mild sepsis, severe sepsis and septic shock.

p-values for the number of days spent with each factor were generated by testing the proportion of intensive care days spent with each factor using non-parametric tests. ICU: Intensive care unit

**Table 3. Antibiotic consumption**

**Admission time within 28 days**

1. Number of days admitted to hospital within 28 days after recruitment. Median + IQR. (PCT vs. Control)

**Subgroup Analysis: Total use of Antimicrobial chemotherapy**

1. Total antibiotic prescription days (all AMCs received, where all AMCs are weighted equally and summed per day, e.g.:→ possible to have e.g. 30 prescription days in 10 days ICU)

**Table 3: Number of AMCs received per day (over all days)**

|                                     | PCT-arm | Control-arm | P-value |
|-------------------------------------|---------|-------------|---------|
| AMC total (N,. %)                   |         |             |         |
| Recruited 09/01/06 – 31/12/07       |         |             |         |
| Recruited 01/01/08 – 02/06/09       |         |             |         |
| Age <65 years                       |         |             |         |
| Age ≥65 years                       |         |             |         |
| APACHE II <20                       |         |             |         |
| APACHE II ≥20                       |         |             |         |
| Bispebjerg                          |         |             |         |
| Gentofte                            |         |             |         |
| Glostrup                            |         |             |         |
| Herlev                              |         |             |         |
| Hillerød                            |         |             |         |
| Hvidovre                            |         |             |         |
| Roskilde                            |         |             |         |
| Skejby                              |         |             |         |
| Århus                               |         |             |         |
| Severe Sepsis or septic shock at BL |         |             |         |
| Milder or no infection at BL        |         |             |         |
| Surgical patient                    |         |             |         |
| Non-surgical patient                |         |             |         |
| Gender                              |         |             |         |

**MICROBIOLOGY**

Follow up: All patients were followed up via the electronic registers at the microbiologic depts., who service the PASS-ICU's regarding all microbiologic samples performed from baseline and until 28 days after. Data have been merged in the PASS-database.

**Table 4:** Number of culture samples performed within 28-days from randomisation [Not done Yet – JU handles this]

| Intervention                   |                | PCT arm<br>N = | Control Arm<br>N = | P-value |
|--------------------------------|----------------|----------------|--------------------|---------|
| <b>Microbiology:</b>           | <b>N., (%)</b> |                |                    |         |
| <b>Blood Cultures</b>          | N. Yes, (%)    |                |                    |         |
| <b>Urine Cultures</b>          | N. Yes, (%)    |                |                    |         |
| <b>Airway Cultures</b>         | N. Yes, (%)    |                |                    |         |
| <b>Samples from other foci</b> | N. Yes, (%)    |                |                    |         |

## **SECTION 3a: Estimating the degree of Organ Failure (OF)**

Follow up: All patients were followed up regarding respiratory failure (mech. Vent + physiologic parameters) and renal failure at 1) the PASS-ICU where the patient was recruited in the primary PASS-crf, 2) regarding mech. Ventilation and physiologic parameters and renal failure at any other PASS-ICU within the 28 day period (when patients were discharged to such an ICU, 3) in the case that a patient was discharged within the 28 day period to a non-PASS ICU (seldom), follow up was made for mech. Vent. and physiologic parameters and renal failure in hospitals "Rigshospitalet" and "Bispebjerg", since only very few ICU days were spent at any other ICU within the 28 day period (48 days of approx 9900 days = approx 0.5%).

The purpose of these analyses is to explore in detail, the quantity of the occurrence of secondary endpoints in the PASS-trial, especially respiratory organ failure and renal organ failure.

Genuine hypothesis: High usage of broad spectrum antibiotics as used in the PASS trial, results in substantially reduced organ function (respiratory, renal and liver) and compromised coagulation and a likewise substantially increased time with manifest organ failure as defined clinically (need for organ support) AND biochemically/physiologically (measured objective parameters).

**NB: Analyzes are summarized in the table 5 below**

time)

### **A. Renal Failure:**

- a. Median/ Mean eGFR for day1 – day10
- b. Median/ Mean eGFR for day11 – day28
- c. Median/Mean eGFR for day1 – day28 (a+b) [eGFR on days in columns in a figure and AUC for the columns]
- d. Median/Mean Carbamide for day1- day10
- e. Median/ Mean Carbamide for day11 – day28
- f. Median/Mean Carbamide for day1 – day28 (a+b) [Carbamide level on days in columns in a figure and AUC for the columns]
- g. Median/Mean Platelet count for day 1-28 [[platelet on days in columns in a figure and AUC for the columns]
- h. Median/Mean Bilirubin [Bilirubin on days in columns in a figure and AUC for the columns]
- i. No. of days within 28 days with eGFR < 60 ml/min/1.73 m<sup>2</sup>
- j. No. of days within day1 – day10 with eGFR < 60 ml/min/1.73 m<sup>2</sup>
- k. No. of days within day1 – day10 with dialysis
- l. No. of days within day11 – day28 with dialysis
- m. No. of days within day1 – day28 with dialysis

C + F+ G + H are all part of one figure with 4 panels.

Explanations: A: Dialysis:

Patients are categorized on days with ND or NA as dialysis=0, since this means patient has been discharged to home. All admissions within 28 days have been drawn from the central hospital register (Green System) and all admissions at dialysis capable departments have been followed up with dialysis.

B: eGFR:

In the ICU, patients are categorized with a new eGFR every day (done in PASS).

Patients are categorized on the basis of their status of eGFR on the last day of ICU. This status is kept until a creatinine measurement is done (on which day the status is changed to a new eGFR). This status is then kept until the next time creatinine is measured – and so forth. In this way every day from 1 – 28 is given an eGFR status.

**In summary, the same principle is used:** From day 1, the first time a creatinine is measured, a eGFR is calculated. Next time the patient has a creatinine measurement, the patient is re-categorized with a new eGFR. That eGFR is kept until the next creatinine measurement etc.

**Table 5. Prevalence and duration of organ failure and other severe disturbances (PCT vs. Control)**

|                                                                                                                                                                     | PCT arm<br>(n = ) | Control<br>Arm<br>(n = ) | P-<br>value |
|---------------------------------------------------------------------------------------------------------------------------------------------------------------------|-------------------|--------------------------|-------------|
| <b>Kidney Failure</b> mL/min/1.73 m <sup>2</sup> (N. days, % of total days):<br>Normal: GFR > 90<br>Mildly impaired: 60–89<br>Moderately/severely impaired: GFR <60 |                   |                          |             |
| <b>Kidney Failure</b> Median/ Mean eGFR for day1 – day10                                                                                                            |                   |                          |             |
| <b>Kidney Failure</b> Median/ Mean eGFR for day11 – day28                                                                                                           |                   |                          |             |
| <b>Kidney Failure</b> Median/Mean eGFR for day1 – day28 (a+b)                                                                                                       |                   |                          |             |
| <b>Kidney Failure</b> Median/Mean Carbamide for day1- day10                                                                                                         |                   |                          |             |
| <b>Kidney Failure</b> Median/ Mean Carbamide for day11 – day28                                                                                                      |                   |                          |             |
| <b>Kidney Failure</b> No. of days within 28 days with eGFR < 60 ml/min/1.73 m <sup>2</sup>                                                                          |                   |                          |             |
| <b>Kidney Failure</b> No. of days within day1 – day10 with eGFR < 60 ml/min/1.73 m <sup>2</sup>                                                                     |                   |                          |             |
| <b>Kidney Failure</b> No. of days within day1 – day10 with dialysis                                                                                                 |                   |                          |             |
| <b>Kidney Failure</b> No. of days within day11 – day28 with dialysis                                                                                                |                   |                          |             |
| <b>Kidney Failure</b> No. of days within day1 – day28 with dialysis                                                                                                 |                   |                          |             |

Table with summarized analyses.

## **SECTION 3b: Attempting to explain the reason for organ failure (if OF is confirmed in section 3a)**

## Antimicrobial toxic explanation

Genuine hypotheses:

- 1) High Exposure (at least 5 or at least 10 days) to a certain combination of antibiotics (Pip/Tazo+Cipro OR Meropenem + Cipro OR Pip/Tazo + Vanco OR Meropenem + Vanco) causes OF

For 2-6: Estimate accumulated risk for day 1, 2, 3 etc. separately in both PCT group and control group.

- 2) Treatment for more than 4 days with Pip/Tazo causes OF (also 10 days)
- 3) Treatment for more than 4 days with Ciprofloxacin causes OF (also 10 days)
- 4) Treatment for more than 4 days with Meropenem causes OF (also 10 days)
- 5) Treatment for more than 4 days with Vancomycin causes OF (also 10 days)
- 6) Treatment for more than 4 days with Cefuroxim causes OF (also 10 days)

For the below analyses two composite endpoints are used for the Pulmonary/renal OF:

- 1) **Organ failure endpoint A:** Clinical Organ Failure judgment: Endpoint=1 for any day with dialysis. If both are present, Endpoint=2. Results are presented as "Clinical Organ Failure Days"
- 2) **Organ failure endpoint B:** Objective Organ failure measures: Endpoint =1 for any day with eGFR <30, repeated with <60 ml/min/1,73 m<sup>2</sup>. "Objective Organ Failure Days"

Analyses:

### A. Objective Organ failure endpoint:

As above, 1) – 6).

- 1) Analyze the median "Objective Organ Failure Days" to occur from "P-T treatment day 5" until 10 days later (counting endpoints for next 10 days). Censor at death.
- 2) Analyze the median "Objective Organ Failure Days" to occur from "Meropenem treatment day 5" until 10 days later (counting endpoints for next 10 days). Censor at death

### B. Multiple Effects models:

Regarding renal dysfunction: Analyze renal recovery in eGFR progression per day on different drugs day 1-10 (Meropenem / Piperacillin-tazobactam / Ciprofloxacin / Cefuroxim), control for other known predictors of renal failure. Additionally after discontinuation of these drugs.



## Sensitivity analyzes: Cox or Logistic Regression ?

Endpoint: Binary endpoint. To be defined according to the median number of organ failure days within 10 days after exposure for 5 days.

Endpoint 1a: [ $>$ median number of “clinical organ failure days”]

Endpoint 1b: [ $>$ median number of “clinical organ failure days”+2 days]

Endpoint 2a: [ $>$ median number of “objective organ failure days”]

Endpoint 2b: [ $>$ median number of “objective organ failure days”+2 days]

Risk variables to be entered:

- a. Treatment for  $\geq 4$  days with Pip/tazo
- b. Treatment for  $\geq 4$  days with Meropenem
- c. Treatment for  $\geq 4$  days with Ciprofloxacin
- d. Treatment for  $\geq 4$  days with Vancomycin
- e. Treatment for  $\geq 4$  days with Pip/tazo + Ciprofloxacin (all 4 days)
- f. Treatment for  $\geq 4$  days with Meropenem + Ciprofloxacin (all 4 days)
- g. Treatment for  $\geq 4$  days with Pip/tazo + Vancomycin (all 4 days)
- h. Treatment for  $\geq 4$  days with Meropenem + Ciprofloxacin (all 4 days)
- i. Treatment for  $\geq 4$  days with Meropenem + Vancomycin (all 4 days)
- j. APACHE II  $\geq 20$
- k. Age  $\geq 65$
- l. Surgical patient
- m. Severe sepsis/septic shock

NB: Treatment count start days 1 – 13 (so 5 days complete on day 5 – 18).

Patients with pauses in the administration of  $\geq 1$  day  $\rightarrow$  exclude

Only count the first administration

Endpoints:

“Clinical Organ Failure Days” and “Objective Organ Failure Days” both as defined above

$\rightarrow$ Transformed to Binary endpoint:

Endpoint 1a: [ $>$ median number of “clinical organ failure days”]

Endpoint 2a: [ $>$ median number of “objective organ failure days”]

(as above in the sensitivity analysis)

1  
2 PASS-II, organ failure – authors,  
3 Forfattere  
4  
5 Chip: JU+JDL+LRN  
6  
7 KMA Hvh/Diacenter: BEL  
8  
9 Glostrup: Mulige: Asger, Anne, Ditte  
10  
11 Hvh: Mulige: Peder C, Jesper, Morten  
12  
13 Herlev: Mulige: Peter, Hamid, Tina  
14  
15 Gentofte: Mulige: Thomas, Katrin  
16  
17 Hillerød: Mulige: Morten, Lars, Kristian A?  
18  
19 Roskilde: Mulige : Niels-Erik  
20  
21 Århus: Mulige: Kim + Mads  
22  
23 Skejby: Mulige: Paul  
24  
25  
26  
27  
28  
29  
30  
31  
32  
33  
34  
35  
36  
37  
38  
39  
40  
41  
42  
43  
44  
45  
46  
47  
48  
49  
50  
51  
52  
53  
54  
55  
56  
57  
58  
59  
60

## Protocol

**A randomised, single-blinded, multicentre trial to investigate if clinical management guided by daily standardised Procalcitonin measurements can reduce the mortality in critically ill patients**

**The Procalcitonin and Survival Study (PASS)**

**Version of protocol: 3.1**

**Date: December 2006**

**Intensive Care Units from many University Hospitals all over Denmark will participate:**

**Sponsor: Scientific:**

**Copenhagen HIV Programme (CHIP) 044, Hvidovre University Hospital, Denmark**

**: Economic: Danish Research Council (Danish State) and other independent research foundations**

**Protocol co-ordinator**

**Jens-Ulrik Stæhr Jensen**

H:S Hvidovre University Hospital

DK - 2650 Hvidovre

Denmark

Phone: +45 36 32 33 07

Fax: +45 36 47 33 40

E-mail: [koordinator@pass-studiet.dk](mailto:koordinator@pass-studiet.dk)

**INVESTIGATOR PROTOCOL AGREEMENT PAGE**

*THIS AGREEMENT IS EQUIVALENT TO A "SIGNED PROTOCOL"*

**The PASS Trial**

Name and qualifications of investigator:

*Name of Investigator:* \_\_\_\_\_

*Post held:* \_\_\_\_\_

*Clinical Centre:* \_\_\_\_\_

I agree:

- to assume responsibility for the proper conduct of the PASS Trial at this site.
- to conduct the trial in compliance with this protocol, any future amendments, and with any other trial conduct procedures provided.
- not to implement any deviations from or changes to the protocol without agreement from the sponsor and prior review and written approval from the Independent Ethics Committee (IEC), except where necessary to eliminate an immediate hazard to the subjects, or for administrative aspects of the trial (where permitted by all applicable regulatory requirements).
- that I am thoroughly familiar with the appropriate use of the Procalcitonin test and the interpretation of the test results, as described in this protocol, and any other information provided by the manufacturer of the test and by the PASS Coordinating centre.
- that I am aware of, and will comply with, "Good Clinical Practice" (ICH-GCP Guideline (CPMP/ICH/135/95, Directive 2001/20/EC)) and all applicable regulatory requirements.
- to ensure that all persons assisting me with the trial are adequately informed about the Procalcitonin test and interpretation and of their trial-related duties and functions as described in the protocol.

---

Signature of investigator

Date

*One signed copy each to be held by the Investigator and PASS Co-ordinating centre.*

**15/10/2007**

**TABLE OF CONTENTS**

|                                                                                                              |           |
|--------------------------------------------------------------------------------------------------------------|-----------|
| <b>PROTOCOL SUMMARY</b>                                                                                      | <b>5</b>  |
| <b>1 TRIAL BACKGROUND AND RATIONALE</b>                                                                      | <b>7</b>  |
| 1.1 Background                                                                                               | 7         |
| 1.2 Rationale - summary                                                                                      | 8         |
| 1.3 Procalcitonin analysing methods                                                                          | 9         |
| 1.4 Rationale for a 24 h interval between blood sampling                                                     | 10        |
| 1.5 Procalcitonin and immuno-compromised patients                                                            | 10        |
| 1.6 Studies on Procalcitonin biology and bacterial infection                                                 | 10        |
| 1.6.1 In vitro and animal studies                                                                            | 10        |
| 1.6.2 Human observational studies                                                                            | 11        |
| 1.6.3 Clinical trials                                                                                        | 11        |
| <b>2 TRIAL OBJECTIVES AND ENDPOINTS</b>                                                                      | <b>11</b> |
| 2.1 Trial Objectives                                                                                         | 11        |
| 2.2 Primary Objectives                                                                                       | 11        |
| 2.3 Secondary Objectives                                                                                     | 11        |
| 2.4 Trial Endpoint(s)                                                                                        | 12        |
| <b>3 INVESTIGATIONAL PLAN</b>                                                                                | <b>13</b> |
| 3.1 Trial Design                                                                                             | 13        |
| 3.2 Trial Population                                                                                         | 14        |
| 3.2.1 Inclusion Criteria                                                                                     | 14        |
| 3.2.2 Exclusion Criteria                                                                                     | 15        |
| 3.3 Treatment During Trial                                                                                   | 15        |
| 3.3.2 Change of PCT-guidance strategy during the trial                                                       | 18        |
| 3.3.2.1 Randomised PCT-guided interventions                                                                  | 18        |
| 3.3.2.2 The non-PCT guided interventions                                                                     | 18        |
| 3.3.3 Antimicrobial Drugs and Dosages                                                                        | 18        |
| 3.3.3.1 Overdose and Toxicity                                                                                | 19        |
| <b>4 MEASUREMENTS AND EVALUATION</b>                                                                         | <b>20</b> |
| 4.1 Time and Events Schedule                                                                                 | 20        |
| 4.1.1 Pre-entry Evaluations                                                                                  | 20        |
| 4.2 On Trial Evaluations                                                                                     | 22        |
| 4.3 Trial drugs                                                                                              | 24        |
| 4.3.1 Dosing Details                                                                                         | 24        |
| 4.3.2 Collection of Blood Samples for Daily Analysis                                                         | 24        |
| <b>5 DATA ANALYSIS METHODS</b>                                                                               | <b>26</b> |
| 5.1 Sample Size Determination                                                                                | 26        |
| 5.2 General Considerations                                                                                   | 26        |
| 5.2.1 Analysis Populations                                                                                   | 26        |
| 5.2.2 Interim Analysis                                                                                       | 27        |
| 5.2.3 Other Issues                                                                                           | 27        |
| 5.3 Efficacy                                                                                                 | 27        |
| 5.3.1 Primary Efficacy Endpoint                                                                              | 27        |
| 5.3.2 Secondary Efficacy Endpoint(s)                                                                         | 27        |
| 5.3.2.1 Other mortality assessments                                                                          | 27        |
| 5.3.3 Combined evaluation of mortality / occurrence of serious bacterial infection while admitted to the ICU | 28        |
| 5.4 Safety                                                                                                   | 29        |

|    |                    |                                                                                                                           |
|----|--------------------|---------------------------------------------------------------------------------------------------------------------------|
| 1  |                    |                                                                                                                           |
| 2  |                    |                                                                                                                           |
| 3  | <b>6</b>           | <b>ADVERSE EVENTS (AE) AND SERIOUS ADVERSE EVENTS (SAE) _____ 29</b>                                                      |
| 4  | 6.1                | Definition of an Adverse Event _____ <b>Fejl! Bogmærke er ikke defineret.</b>                                             |
| 5  | 6.1.2              | Definition of a Serious Adverse Event _____ <b>Fejl! Bogmærke er ikke defineret.</b>                                      |
| 6  | 6.1.3              | Protocol-specific Exemptions from the AE and SAE Definition _____ <b>Fejl! Bogmærke er ikke</b>                           |
| 7  |                    | <b>defineret.</b>                                                                                                         |
| 8  | 6.2                | Clinical Laboratory Abnormalities and Other Abnormal Assessments as AEs and SAEs <b>Fejl! Bogmærke er ikke defineret.</b> |
| 9  | 6.3                | Recording of the AEs and SAEs in the CRF _____ <b>Fejl! Bogmærke er ikke defineret.</b>                                   |
| 10 | 6.4                | Documenting AEs and SAEs _____ <b>Fejl! Bogmærke er ikke defineret.</b>                                                   |
| 11 | 6.5                | Follow-up of AEs and SAEs _____ <b>Fejl! Bogmærke er ikke defineret.</b>                                                  |
| 12 | 6.6                | Time-lines for reporting of SAEs _____ <b>Fejl! Bogmærke er ikke defineret.</b>                                           |
| 13 | <b>7</b>           | <b>TRIAL ADMINISTRATION _____ 30</b>                                                                                      |
| 14 | 7.1                | Data Collection _____ 30                                                                                                  |
| 15 | 7.2                | Regulatory and Ethical Considerations _____ 31                                                                            |
| 16 | 7.2.1              | Regulatory Authority Approval _____ 31                                                                                    |
| 17 | 7.2.2              | Ethics Approval _____ 31                                                                                                  |
| 18 | 7.2.3              | Subject Informed Consent _____ 31                                                                                         |
| 19 | 7.3                | Trial Monitoring _____ 32                                                                                                 |
| 20 | 7.4                | Quality Assurance _____ 33                                                                                                |
| 21 | 7.5                | Trial and Site Closure _____ 33                                                                                           |
| 22 | 7.6                | Records Retention _____ 34                                                                                                |
| 23 | 7.7                | Information Disclosure and Inventions _____ 34                                                                            |
| 24 | 7.7.1              | Confidentiality _____ 34                                                                                                  |
| 25 | 7.7.2              | Publication _____ 35                                                                                                      |
| 26 | 7.8                | Indemnification and Compensation for Injury _____ 35                                                                      |
| 27 | <b>8.</b>          | <b>REFERENCES _____ 36</b>                                                                                                |
| 28 | <b>9.</b>          | <b>APPENDICES _____ 43</b>                                                                                                |
| 29 | <b>Appendix 1:</b> | <b>The Declaration of Helsinki _____ 43</b>                                                                               |
| 30 | <b>Appendix 2:</b> | <b>Abbreviations _____ 44</b>                                                                                             |
| 31 | <b>Appendix 3:</b> | <b>Table of conversion factors for laboratory units _____ 45</b>                                                          |
| 32 | <b>Appendix 4:</b> | <b>Table of the used antibacterial and antifungal drugs _____ 48</b>                                                      |
| 33 |                    |                                                                                                                           |
| 34 |                    |                                                                                                                           |
| 35 |                    |                                                                                                                           |
| 36 |                    |                                                                                                                           |
| 37 |                    |                                                                                                                           |
| 38 |                    |                                                                                                                           |
| 39 |                    |                                                                                                                           |
| 40 |                    |                                                                                                                           |
| 41 |                    |                                                                                                                           |
| 42 |                    |                                                                                                                           |
| 43 |                    |                                                                                                                           |
| 44 |                    |                                                                                                                           |
| 45 |                    |                                                                                                                           |
| 46 |                    |                                                                                                                           |
| 47 |                    |                                                                                                                           |
| 48 |                    |                                                                                                                           |
| 49 |                    |                                                                                                                           |
| 50 |                    |                                                                                                                           |
| 51 |                    |                                                                                                                           |
| 52 |                    |                                                                                                                           |
| 53 |                    |                                                                                                                           |
| 54 |                    |                                                                                                                           |
| 55 |                    |                                                                                                                           |
| 56 |                    |                                                                                                                           |
| 57 |                    |                                                                                                                           |
| 58 |                    |                                                                                                                           |
| 59 |                    |                                                                                                                           |
| 60 |                    |                                                                                                                           |

**A randomised, single blinded, multicentre trial to evaluate whether daily Procalcitonin measurements and immediate diagnostic and therapeutic response on abnormal values and day-to-day changes can reduce the mortality of critically ill patients in the Intensive Care Unit.**

## The Procalcitonin And Survival Study (PASS)

### PROTOCOL SUMMARY

#### Inclusion:

Fulfilment of all of the following three criteria:

- 1 Male or female, aged  $\geq 18$  years of age.
- 2 Admitted to the participating intensive care units (ICU) at following hospitals: Hvidovre Hospital; Bispebjerg Hospital; Herlev Hospital; Glostrup Hospital; Gentofte Hospital; Hillerød Hospital; Roskilde Hospital; Århus University Hospital, Århus; Århus University Hospital, Skejby.
- 3 1) Ability to understand and provide written informed consent to participate in this trial,  
**or**  
2) Ability to understand and provide oral informed consent in presence of at least one impartial witness who should sign and personally date the consent form  
**or**  
3) The subjects legally acceptable representative can understand and provide written informed consent if the subject is not capable of this because of the present mental or physical condition of the subject.

#### Exclusion:

A subject will **NOT** be eligible for inclusion in this trial if any of the following criteria apply:

1. Subjects with known hyper-bilirubinaemia ( $>0.4$  mg/ ml) or hypertriglyceridaemia ( $>10$  g/l) since this can interfere with measurements. If subjects with unknown status on these points are included and have PCT measurements, the measuring-equipment will detect these conditions.
2. Subjects suffering from a blood disorder, where daily sampling of 7 ml of blood for maximally 28 days (210 ml distributed on 28 days) will be an inconvenience or a potential risk, which could compromise the safety of the subject.
3. Subjects who are pregnant or breast feeding

1  
2  
3  
4  
5  
6  
7 The *a priori* probability of surviving with the normal recommended diagnostics and treatment  
8 with the presently available means to detect infections and on the other hand the normal  
9 diagnostics and treatment together with daily Procalcitonin measurements and prompt clinical  
10 reaction should be equal.  
11  
12

13  
14  
15 **Randomisation:**

16  
17 Two arms (1:1), n = 500 per arm:

18  
19 Arm 1: Normal recommended diagnostics and treatment of infections in the intensive  
20 care unit (standard of care)  
21

22  
23 Arm 2: Normal recommended diagnostics and treatment of infections in the intensive  
24 care unit (standard of care) **and** Procalcitonin guided diagnostics and treatment of  
25 infection  
26  
27

28  
29 **Primary Trial Objective:** To address whether daily Procalcitonin measurements and immediate  
30 diagnostic and therapeutic response on abnormal values and day-to-day changes can reduce  
31 the mortality of critically ill patients in the ICU.  
32

33  
34 **Trial registration days:** Intensive Care Unit admission day, running routine registration of  
35 examinations and blood tests, day of discharge or death, day 28 after admission, day 60, 90,  
36 120 and 180 after discharge.  
37

38  
39 **Data collection:** The data collection will be simple and performed real time via fax.  
40  
41  
42  
43  
44  
45  
46  
47  
48  
49  
50  
51  
52  
53  
54  
55  
56  
57  
58  
59  
60



# 1 TRIAL BACKGROUND AND RATIONALE

## 1.1 Background

### 1.1.1 Sepsis and mortality in the Intensive Care Unit

Sepsis remains a major cause of mortality in critically ill patients admitted to the Intensive Care Unit (ICU)<sup>1-2</sup>. All-cause mortality during ICU admission ranges from 12.1% in non-infected patients to 43.9% in infected patients<sup>3</sup>. Patients who are discharged to other departments and later to their own home or an institution for rehabilitation, continue to have a high mortality (additionally 10-20%) for 20-30 days after ICU discharge<sup>4-7</sup>. Different explanations for this have been proposed. Among the most important are:

- 1) During ICU admission it becomes clear that further treatment lacks perspective for the patient (often chronic organ diseases and cancer diseases) and the patient is therefore discharged to the relevant department when discharge from the ICU is possible.
- 2) After discharge from the ICU the physical condition of the patient deteriorates because of a severe disease with a dismal prognosis and it is decided together with the patient and relatives that the patient should not be admitted to the ICU again.
- 3) Critically ill patients often have an immunological incompetence and therefore these patients are susceptible to serious infections. Additionally these infections often have an atypical course and thereby a delayed diagnosis. This immunological incompetence prevails some time after discharge from the ICU why the patient remains susceptible to infections for this period of time. There is a grave risk that these serious infections with an atypical course can be diagnosed late in the course and cause an increased risk of mortality for critically ill patients.

### 1.1.2 Procalcitonin and bacterial infections

In 1993 Assicot et al. reported that a high level of serum-Procalcitonin (PCT) was closely related to bacterial infection and seemingly correlated to the severity of the infection<sup>8</sup>. This finding has since been ascertained in many studies demonstrating high levels (2.0 ng/ml-50.0 ng/ml (-1500 ng/ml)) of PCT in patients with systemic bacterial infection, while low levels have consistently been found in patients with localised bacterial infections and viral infections<sup>9-16</sup>. Others have shown low PCT levels (and seldom up till maximally 3.0 ng/ml) in non-infected patients following surgery, trauma and myocardial infarction<sup>10, 17-21</sup>. Sensitivity and specificity for sepsis when PCT levels are above 5.0 ng/ml have been estimated to 80-90% and 85-100%, respectively, in the largest of these studies.

The PCT level starts decreasing within 24 h after surgery, trauma and myocardial infarction in non-infected patients in contrast to the C-reactive protein, which has a peak level 36-72 h after these events<sup>10-17-21</sup>.

Consequently, bacterial infection is suspected if PCT is increasing 24 h after surgery, trauma or myocardial infarction.

### 1.1.3 Procalcitonin kinetics, biochemistry and cellular biology

PCT is a 13 kDa, 116 amino acid polypeptide, initially described as a pro-hormone of Calcitonin, a

1  
2  
3 hormone in the calcium metabolism, which is produced in the medullary C-cells in the thyroid gland<sup>22-24</sup>.  
4 Recent studies have shown that the PCT variant, which is related to infection is produced in other tissues  
5 (liver, kidney, muscle, fat)<sup>25-27</sup>  
6  
7 Kinetic studies with healthy humans and baboons have shown a rapid release of PCT within 2-6 hours  
8 after injection of bacteria or bacterial endotoxin. This time to release is significantly shorter than that of C-  
9 reactive protein (8-24 h). The plasma half life of PCT is approximately 24 h. PCT measurements in  
10 healthy, uninfected volunteers has been shown very low levels (<0.05 ng/ml)<sup>10,28-29</sup>.  
11  
12  
13

#### 14 **1.1.4 Procalcitonin-guided treatment and reduction in the use of antimicrobial agents**

15  
16 A recent study has demonstrated a reduced use of antimicrobial agents in patients with lower respiratory  
17 tract symptoms, when the treatment was guided by the initial PCT level<sup>30</sup>.  
18  
19

#### 20 **1.1.5 Procalcitonin and risk of mortality**

21  
22 We have shown that a PCT increase after reaching a level of 1.0 ng/ml is an independent predictor of  
23 mortality in critically ill patients. Patients who did not reach a PCT level above 1.0 ng/ml had an all cause  
24 mortality risk of 4.7% while admitted in the ICU, compared to an all cause mortality of 19.1% for the whole  
25 population of ICU patients. Patients who reached a PCT value above 1.0 ng/ml who had a decreasing  
26 PCT the next day had a mortality risk of 18.9%, but patients who had an increasing PCT level after  
27 reaching 1.0 ng/ml had a mortality risk of 32.7%. This increase in mortality risk was significant for the  
28 entire follow-up period of 90 days<sup>31</sup>.  
29  
30

31  
32 The mortality risk increased for every day the PCT increased. Taking in mind the close relation between  
33 PCT levels and bacterial infection, a large part of this mortality increase is (when PCT is increasing), to  
34 the best of the existing knowledge, attributable to uncontrolled bacterial infections. This is supported by  
35 the findings of the European Sepsis Group<sup>3</sup>.  
36  
37

38 The rapid release of PCT to the blood stream (2-6 h), when infection is progressing, makes acute  
39 detection of ongoing serious infection possible, hereby potentially reducing mortality in critically ill patients  
40 if treatment is guided acutely by PCT measurements.  
41  
42  
43

## 44 **1.2 Rationale - summary**

45 Sepsis and complications to sepsis are major causes of mortality in critically ill patients<sup>1-2</sup>. Rapid  
46 treatment of sepsis is of crucial importance for survival of patients. In the ICU, the infectious  
47 status of the patient is often difficult to assess because symptoms cannot be expressed  
48 (unconscious or sedated patients) and signs may present atypically because of immunologic  
49 incompetence and masking by the drugs given and thermo-influencing-therapy, i.e. dialysis.  
50 Biological and biochemical markers of inflammation (WBC, C-reactive protein) may often be  
51 influenced by other parameters than infection, such as: trauma, surgery, other types of  
52 inflammation such as rheumatoid diseases (C-reactive protein) and gluco-corticosteroid  
53 treatment (WBC), and may be unacceptably slowly released after progression of an infection<sup>32-</sup>  
54  
55  
56  
57  
58  
59  
60  
61  
62  
63  
64  
65  
66  
67  
68  
69  
70  
71  
72  
73  
74  
75  
76  
77  
78  
79  
80  
81  
82  
83  
84  
85  
86  
87  
88  
89  
90  
91  
92  
93  
94  
95  
96  
97  
98  
99  
100  
101  
102  
103  
104  
105  
106  
107  
108  
109  
110  
111  
112  
113  
114  
115  
116  
117  
118  
119  
120  
121  
122  
123  
124  
125  
126  
127  
128  
129  
130  
131  
132  
133  
134  
135  
136  
137  
138  
139  
140  
141  
142  
143  
144  
145  
146  
147  
148  
149  
150  
151  
152  
153  
154  
155  
156  
157  
158  
159  
160  
161  
162  
163  
164  
165  
166  
167  
168  
169  
170  
171  
172  
173  
174  
175  
176  
177  
178  
179  
180  
181  
182  
183  
184  
185  
186  
187  
188  
189  
190  
191  
192  
193  
194  
195  
196  
197  
198  
199  
200  
201  
202  
203  
204  
205  
206  
207  
208  
209  
210  
211  
212  
213  
214  
215  
216  
217  
218  
219  
220  
221  
222  
223  
224  
225  
226  
227  
228  
229  
230  
231  
232  
233  
234  
235  
236  
237  
238  
239  
240  
241  
242  
243  
244  
245  
246  
247  
248  
249  
250  
251  
252  
253  
254  
255  
256  
257  
258  
259  
260  
261  
262  
263  
264  
265  
266  
267  
268  
269  
270  
271  
272  
273  
274  
275  
276  
277  
278  
279  
280  
281  
282  
283  
284  
285  
286  
287  
288  
289  
290  
291  
292  
293  
294  
295  
296  
297  
298  
299  
300  
301  
302  
303  
304  
305  
306  
307  
308  
309  
310  
311  
312  
313  
314  
315  
316  
317  
318  
319  
320  
321  
322  
323  
324  
325  
326  
327  
328  
329  
330  
331  
332  
333  
334  
335  
336  
337  
338  
339  
340  
341  
342  
343  
344  
345  
346  
347  
348  
349  
350  
351  
352  
353  
354  
355  
356  
357  
358  
359  
360  
361  
362  
363  
364  
365  
366  
367  
368  
369  
370  
371  
372  
373  
374  
375  
376  
377  
378  
379  
380  
381  
382  
383  
384  
385  
386  
387  
388  
389  
390  
391  
392  
393  
394  
395  
396  
397  
398  
399  
400  
401  
402  
403  
404  
405  
406  
407  
408  
409  
410  
411  
412  
413  
414  
415  
416  
417  
418  
419  
420  
421  
422  
423  
424  
425  
426  
427  
428  
429  
430  
431  
432  
433  
434  
435  
436  
437  
438  
439  
440  
441  
442  
443  
444  
445  
446  
447  
448  
449  
450  
451  
452  
453  
454  
455  
456  
457  
458  
459  
460  
461  
462  
463  
464  
465  
466  
467  
468  
469  
470  
471  
472  
473  
474  
475  
476  
477  
478  
479  
480  
481  
482  
483  
484  
485  
486  
487  
488  
489  
490  
491  
492  
493  
494  
495  
496  
497  
498  
499  
500  
501  
502  
503  
504  
505  
506  
507  
508  
509  
510  
511  
512  
513  
514  
515  
516  
517  
518  
519  
520  
521  
522  
523  
524  
525  
526  
527  
528  
529  
530  
531  
532  
533  
534  
535  
536  
537  
538  
539  
540  
541  
542  
543  
544  
545  
546  
547  
548  
549  
550  
551  
552  
553  
554  
555  
556  
557  
558  
559  
560  
561  
562  
563  
564  
565  
566  
567  
568  
569  
570  
571  
572  
573  
574  
575  
576  
577  
578  
579  
580  
581  
582  
583  
584  
585  
586  
587  
588  
589  
590  
591  
592  
593  
594  
595  
596  
597  
598  
599  
600  
601  
602  
603  
604  
605  
606  
607  
608  
609  
610  
611  
612  
613  
614  
615  
616  
617  
618  
619  
620  
621  
622  
623  
624  
625  
626  
627  
628  
629  
630  
631  
632  
633  
634  
635  
636  
637  
638  
639  
640  
641  
642  
643  
644  
645  
646  
647  
648  
649  
650  
651  
652  
653  
654  
655  
656  
657  
658  
659  
660  
661  
662  
663  
664  
665  
666  
667  
668  
669  
670  
671  
672  
673  
674  
675  
676  
677  
678  
679  
680  
681  
682  
683  
684  
685  
686  
687  
688  
689  
690  
691  
692  
693  
694  
695  
696  
697  
698  
699  
700  
701  
702  
703  
704  
705  
706  
707  
708  
709  
710  
711  
712  
713  
714  
715  
716  
717  
718  
719  
720  
721  
722  
723  
724  
725  
726  
727  
728  
729  
730  
731  
732  
733  
734  
735  
736  
737  
738  
739  
740  
741  
742  
743  
744  
745  
746  
747  
748  
749  
750  
751  
752  
753  
754  
755  
756  
757  
758  
759  
760  
761  
762  
763  
764  
765  
766  
767  
768  
769  
770  
771  
772  
773  
774  
775  
776  
777  
778  
779  
780  
781  
782  
783  
784  
785  
786  
787  
788  
789  
790  
791  
792  
793  
794  
795  
796  
797  
798  
799  
800  
801  
802  
803  
804  
805  
806  
807  
808  
809  
810  
811  
812  
813  
814  
815  
816  
817  
818  
819  
820  
821  
822  
823  
824  
825  
826  
827  
828  
829  
830  
831  
832  
833  
834  
835  
836  
837  
838  
839  
840  
841  
842  
843  
844  
845  
846  
847  
848  
849  
850  
851  
852  
853  
854  
855  
856  
857  
858  
859  
860  
861  
862  
863  
864  
865  
866  
867  
868  
869  
870  
871  
872  
873  
874  
875  
876  
877  
878  
879  
880  
881  
882  
883  
884  
885  
886  
887  
888  
889  
890  
891  
892  
893  
894  
895  
896  
897  
898  
899  
900  
901  
902  
903  
904  
905  
906  
907  
908  
909  
910  
911  
912  
913  
914  
915  
916  
917  
918  
919  
920  
921  
922  
923  
924  
925  
926  
927  
928  
929  
930  
931  
932  
933  
934  
935  
936  
937  
938  
939  
940  
941  
942  
943  
944  
945  
946  
947  
948  
949  
950  
951  
952  
953  
954  
955  
956  
957  
958  
959  
960  
961  
962  
963  
964  
965  
966  
967  
968  
969  
970  
971  
972  
973  
974  
975  
976  
977  
978  
979  
980  
981  
982  
983  
984  
985  
986  
987  
988  
989  
990  
991  
992  
993  
994  
995  
996  
997  
998  
999  
1000

1  
2  
3 For these reasons, in the clinical setting, it is often necessary to initiate or adjust antimicrobial  
4 therapy on an unsure ground and the relevant therapy may in some situations be delayed for  
5 important hours or even days. Specific and rapid markers of bacterial infection have been  
6 sought for use in the ICU. Mortality in critically ill patients increases gravely when Procalcitonin  
7 levels increase from day to day<sup>31</sup>. Low PCT levels have been shown to effectively rule out  
8 sepsis<sup>12</sup>.  
9

10  
11  
12  
13  
14 However, no randomised controlled trials have been conducted to show if mortality in critically ill  
15 patients can be reduced by using a strategy of daily standardised Procalcitonin measurements  
16 as an early detector of serious bacterial infection. Therefore evidence is presently not sufficient  
17 to introduce daily consecutive Procalcitonin measurements to guide the diagnostic and  
18 therapeutic management of patients admitted to the ICU .  
19  
20  
21

22  
23 The rationale for this trial is to assess the ability of daily Procalcitonin measurements to reduce  
24 the mortality of critically ill patients.  
25  
26

### 27 28 **1.3 Procalcitonin analysing methods**

29 There are four commercially available analysing methods for measuring blood levels of Procalcitonin, one  
30 semi-quantitative and three quantitative. Two of these are described below, the oldest and most used  
31 test, LUMITEST® BRAHMS /BRAHMS PCT LIA, and a newer fully automated test with a higher  
32 sensitivity, KRYPTOR® PCT BRAHMS. KRYPTOR® PCT BRAHMS will be used for all Procalcitonin  
33 analyses in this study<sup>34</sup>.  
34  
35  
36

#### 37 38 **1.3.1 LUMITEST® BRAHMS /BRAHMS PCT LIA**

39 The oldest and so far most used quantitative test is LUMITEST® BRAHMS /BRAHMS PCT LIA.  
40 Analysis is made by a "sandwich" luminiscens immuno-assay with an anti-catacalcin coated tube:  
41 Anti-**Catacalcin** binds catacalcin in the patient sample and is hereby immobilised (catacalcin  
42 could otherwise interfere with the analysis).  
43

44 Anti-**Calcitonin** antibody is marked with a luminescent *acridin*-derivative.  
45

46 H<sub>2</sub>O<sub>2</sub> and NaOH are added and these react with the *acridin*-derivative which leads to the  
47 formation of *acridon* and this process is accompanied by transmission of light. The quantity of this  
48 light is proportional to the Procalcitonin concentration in the sample.  
49

50 We have found a coefficient of variation (CV) in the measuring interval between 0.1 ng/ml-1.0  
51 ng/ml of 0.09-0.83 for this test. At PCT levels above 1.0 ng/ml, we found CV's of 0.008-0.065  
52 (range)<sup>37</sup>.  
53

54 The manufacturer claims a *functional assay sensitivity* (CV<0.2) of 0.3 ng/ml.  
55  
56

#### 57 58 **1.3.2 KRYPTOR® PCT BRAHMS**

59 A new, and according to the manufacturer, more precise assay is the fully automated  
60 KRYPTOR® PCT BRAHMS. Procalcitonin is analysed using the analysing machine KRYPTOR®  
and fluids and utensils from the company BRAHMS diagnostica, Berlin. KRYPTOR® uses

1  
2  
3 TRACE technology (Time Resolved Amplified Cryptate Emission), which is a non-radiating  
4 transmission of energy. The transmission happens between two fluorescent compounds:  
5 Europium Cryptate (donor) and XL665 (acceptor). While the antigen-antibody complex is formed,  
6 a signal is measured.  
7

8  
9 The functional assay sensitivity (CV < 0.2) is according to the manufacturer 0.06 ng/ml for the  
10 KRYPTOR ® test. In the relevant clinical interval (which has not quite been defined yet) the CV is  
11 0.02-0.03 (product information).  
12

- 13 • Studies concerning Procalcitonin have so far mainly been using LUMITEST ® BRAHMS  
14 /BRAHMS PCT LIA.  
15  
16  
17  
18  
19

#### 20 **1.4 Rationale for a 24 h interval between blood sampling**

21 Several studies have shown a half-life of Procalcitonin of 20-30 hours and Procalcitonin levels  
22 increase 2-6 h after bacterial products are presented in the blood stream<sup>10,28-29, 35</sup>. An important  
23 exception to this is patients suffering from severe uraemia, where the Procalcitonin half-life is  
24 prolonged, but it has been demonstrated, that Procalcitonin is removed by dialysis<sup>35</sup>. Studies  
25 concerning Procalcitonin and surgery have shown, that the Procalcitonin blood level is on a  
26 decreasing curve 24 h after major thoracic and abdominal surgery, except in infected patients<sup>17-  
27 21</sup>. In conclusion, a Procalcitonin level which is increasing 24 h after a therapy shift or after  
28 surgery suggests progression of infection.  
29  
30  
31  
32  
33  
34  
35

#### 36 **1.5 Procalcitonin and immuno-compromised patients**

37 Markers and mediators of inflammation and infection are often dependent on a functioning  
38 immune system, which is able to produce the substance measured, e.g. WBC, TNF, different  
39 interleukins<sup>10,15,16, 36</sup>. It has been established that Procalcitonin is not dependent on blood cells  
40 and their mediators, and Procalcitonin is mainly produced by tissues like liver, kidney, muscle  
41 and fat<sup>25-28</sup>. In concordance with this, studies investigating Procalcitonin in neutropenic patients  
42 have found results comparable to those for immuno-competent patients<sup>36-41</sup>. A few studies  
43 regarding neutropenic patients that compared PCT levels to positive blood cultures have found  
44 a low sensitivity of the test for bacteriemia, but these studies lack clear definitions of virulence of  
45 different micro-organisms (e.g. Coagulase negative staphylococci vs. Gram negative rods) in  
46 their study designs<sup>40</sup>.  
47  
48  
49  
50  
51  
52  
53  
54

#### 55 **1.6 Studies on Procalcitonin biology and bacterial infection**

##### 56 **1.6.1 In vitro and animal studies**

57 In vitro studies have shown Procalcitonin to be an inducer of albumin synthesis in rat liver tissue  
58 measured on mRNA and protein synthesis. This was found to be opposite to TNF $\alpha$  and IL-6,  
59 these substances lowering albumin synthesis<sup>42</sup>. In a study of sepsis in baboons, low PCT was  
60

found in non-infected subjects and high PCT in infected subjects, and PCT blood levels started increasing after 2 hours<sup>10</sup>. In another baboon model Procalcitonin incompetence was shown in an anhepatic subject<sup>28</sup>.

In a study of burn wound and *Pseudomonas aeruginosa* septicaemia in rats, a high correlation between endotoxin levels and PCT in blood was found<sup>43</sup>.

### 1.6.2 Human observational studies

Most of the present knowledge on Procalcitonin has been established by observational studies. Key-references are mentioned in paragraph 1.1 and 1.2

### 1.6.3 Clinical trials

Only few Randomized Controlled Trials regarding PCT-guided treatment have so far been published, one of special interest has used PCT-guided treatment (n=119+124) and has assessed the ability of this clinical strategy to reduce use of antimicrobial therapy in patients with suspected lower respiratory tract infection. A Relative Risk of 0.49 [95% CI 0.44-0.55] for antibiotic exposure was demonstrated, without any significant difference in culture growth from patient samples, quality of life, mortality, inflammatory parameters (temperature, C-reactive protein, WBC), number of days admitted and need for stay in intensive care unit. The study was designed to detect a 30 % difference with 95% stringency. However some of the mentioned endpoints do not occur in all patients, and in these cases (mortality, need for stay in ICU) it may be false to conclude, that there is no difference between groups within the chosen 30 % limit<sup>30</sup>. A very small study (n=12+13=25) has tried to investigate empiric prophylaxis with fluor-quinolone Ofloxacin in patients with abdominal aortic aneurism. However the sample size of this study does not justify any conclusions on this issue<sup>44</sup>.

## 2 TRIAL OBJECTIVES AND ENDPOINTS

### 2.1 Trial Objectives

### 2.2 Primary Objectives

To address whether immediate diagnostic and therapeutic initiatives guided by abnormal high and increasing values of Procalcitonin measured daily can reduce the mortality of critically ill patients in the ICU.

### 2.3 Secondary Objectives

1. To determine mortality of ICU patients at discharge from the ICU, at day 60,90, 120 and 180.

- 2.
  - 3.
  - 4.
  - 5.
  - 6.
  - 7.
  - 8.
  - 9.
  - 10.
  - 11.
  - 12.
  - 13.
  - 14.
  - 15.
  - 16.
  - 17.
  - 18.
  - 19.
  - 20.
  - 21.
  - 22.
  - 23.
  - 24.
  - 25.
  - 26.
  - 27.
  - 28.
  - 29.
  - 30.
  - 31.
  - 32.
  - 33.
  - 34.
  - 35.
  - 36.
  - 37.
  - 38.
  - 39.
  - 40.
  - 41.
  - 42.
  - 43.
  - 44.
  - 45.
  - 46.
  - 47.
  - 48.
  - 49.
  - 50.
  - 51.
  - 52.
  - 53.
  - 54.
  - 55.
  - 56.
  - 57.
  - 58.
  - 59.
  - 60.
2. To determine differences in prescription of antimicrobial therapy in the two arms.
  3. To determine the frequency of patients with complications to infection in the two arms, defined as; sepsis, severe sepsis, septic shock, disseminated intravascular coagulation, multi-organ dysfunction syndrome (MODS), coma (Glasgow Coma Scale), hypotension, respiratory insufficiency (ventilator treatment need), liver insufficiency, acute uremia (three times increase in baseline creatinine).
  4. APACHE II score
  5. Accumulated PCT increases over time
  6. To determine the number of diagnostic image procedures per day after enrolment in the trial in the two arms
  7. To determine the number of non-routine microbiological samples taken per day after enrolment in the trial in the two arms
  8. To determine the number of surgical procedures per day after enrolment in the trial in the two arms
  9. To determine the time to the first change in antimicrobial chemotherapy after admittance to the ICU in the two arms

## 2.4 Trial Endpoint(s)

### **Primary:**

Mortality at day 28 after admission to the ICU.

### **Secondary:**

1. Mortality while admitted to the ICU, Mortality at day 60, 90 and 180 after admission to the ICU
2. Defined day doses of antimicrobial therapy in each arm
3. Occurrence of sepsis, severe sepsis, septic shock, DIC. Assessment of Glasgow Coma Scale, measurement of Blood Pressure (systolic blood pressure < 90), days with artificial ventilation, Factor 2-7-9 < 0.7, creatinine (increase factor 3 from baseline), MODS.
4. SOFA score daily (Temperature, Mean Arterial Pressure, Heart Rate, Respiratory Rate, FIO<sub>2</sub>, HCO<sub>3</sub><sup>-</sup>, pH (arterial), Se- Na<sup>+</sup>, K<sup>+</sup>, Creatinine, Haematocrite, White Blood Count+ differential count, Glasgow Coma Scale).



5.  $AUC_{\text{Procalcitonin}}$  for the Procalcitonin-measuring group and for the control group.
6. Number of diagnostic images after admission to the ICU.
7. Number of non-routine microbiological sample taken after admittance to the ICU.
8. Number of surgical procedures during the trial
9. Time to the first change in antimicrobial chemotherapy after admittance to the ICU

### 3 INVESTIGATIONAL PLAN

#### 3.1 Trial Design

##### 3.1.1 Intervention

This is a randomised, single-blinded multicentre trial.

Approximately 1000 subjects admitted to an ICU in the participating University hospitals will be included. All patients included will receive the the standard recommended diagnostic and therapeutic procedures mandated at the particular ICU. Additionally, the patients will be randomised for:

1. No PCT guided diagnostics and treatment (i.e. the standard-of-care / **control arm**).

**Or**

2. Daily PCT measurements and protocol-specified additional diagnostic and/or therapeutic interventions guided by the PCT levels observed. High or increasing PCT levels will mandate such interventions (see section 3.3.1 for details of interventions)(the **PCT intervention arm**)

##### 3.1.2 Randomisation

The randomisation is performed by the PASS study centre and is stratified according to site, age and initial Acute Physiology And Chronic Health Evaluation II (APACHE II) score. For patients randomised to the PCT intervention arm, daily PCT levels are communicated to the team responsible for the clinical management together with a recommendation of what interventions the investigator team is expected to initiate based on the PCT measurement. In

1  
2  
3 the control arm, blood samples for PCT will be analysed simultaneously with samples from the  
4 PCT intervention arm, but results of these PCT analyses will remain blinded for the investigators  
5 until the study has been completed. The PCT measurements will be conducted daily as long as  
6 the patient is admitted to the ICU, but maximally 28 days from time of enrolment in this study.  
7  
8 While patients remain in the hospital, and after discharge from the ICU, samples will be  
9 collected for PCT determination but the samples will not be analysed real-time and hence the  
10 results will not be used to guide interventions outside the ICU, except if requested by the ICU  
11 investigator in conjunction with the discharge of the patient. Patients transferred from one ICU  
12 to another ICU, will remain in the trial provided that the receiving ICU also participates in this  
13 trial.  
14  
15  
16  
17  
18  
19  
20  
21  
22  
23

## 24 3.2 Trial Population

### 25 3.2.1 Inclusion Criteria

26 A subject will be eligible for inclusion in this trial only if all of the following criteria apply:

- 27  
28  
29  
30  
31 1 Male or female, aged  $\geq 18$  years of age.  
32  
33 2 Admitted to the participating intensive care units. Patients should be included within 24  
34 h. If a patient has not been included at this time, this patient cannot be included in the  
35 present admittance.  
36  
37 3 Subjects should in the investigator's opinion be likely to be admitted to the ICU for more  
38 than 24 h. Subjects should not be likely (<10%) to die or be discharged in this period of  
39 time  
40  
41  
42  
43  
44  
45  
46 4 Ability to understand and provide written informed consent to participate in this trial,  
47  
48 **or**  
49  
50 Ability to understand and provide oral informed consent in presence of at least one  
51 impartial witness who should sign and personally date the consent form  
52  
53  
54  
55 **or**  
56  
57 The subjects legally acceptable representative can understand and provide written  
58 informed consent if the subject is not capable of this because of the present mental or  
59 physical condition of the subject.  
60



### 3.2.2 Exclusion Criteria

A subject will **NOT** be eligible for inclusion in this trial if any of the following criteria apply:

4. Subjects with known hyper-bilirubinaemia (>0.4 mg/ ml) or hypertriglyceridaemia (>10 g/l) since this can interfere with measurements. If subjects with unknown status on these points are included and have PCT measurements, the measuring-equipment will detect these conditions.
5. Subjects suffering from a blood disorder, where daily sampling of 7 ml of blood for maximally 28 days (210 ml distributed on 28 days) will be an inconvenience or a potential risk, which could compromise the safety of the subject.

### 3.3 Treatment During Trial

The aim of the PCT guided treatment is to reduce time to relevant treatment of a serious infection and thereby to reduce the mortality. All subjects will receive the standard-of-care evaluations and therapeutic interventions recommended in the ICU at which the patient is admitted to. Subjects in the PCT measurement group will additionally receive expanded diagnostics and treatment should the PCT levels be found to high and/or increasing (see section 3.3.1 for definitions).

Access to results of PCT measurements of any kind (semi-quantitative or quantitative) at any time in the study period is not allowed for patients randomised to the control arm.

The PASS study group in collaboration with the PASS Steering Committee, will issue guidelines for the composition of the interventions that a high or increasing PCT level would mandate. Some variation between sites is acceptable, whereas all patients within a given ICU should follow that ICU's guidelines. The guidelines will be updated when new information becomes available. In the guidelines, there may be several alternatives indicated for a given situation. The investigator is not mandated to follow the guidelines.

#### 3.3.1 Procalcitonin levels and diagnostic and therapeutic consequences

The situation mandating additional interventions in the the PCT intervention arm is based on the following criteria:

- PCT levels  $\geq$  1.00 ng/ml

**and**

- The PCT level increases one day to the next or has an irrelevant decrease of < 10%

The daily assessment of PCT guided interventions will be as follows:

- Subjects with PCT levels  $\geq 1.00$  ng/ml based on the first determination after enrolment into the study will follow the principles for interventions as detailed below.
- Subjects with PCT levels  $\geq 1.00$  ng/ml and with a day (n) to day (n+1) PCT increase or a decrease of < 10% (irrelevant decrease) will follow the principles for interventions as detailed below.
  - Microbiology: blood cultures, airway cultures, urine cultures and samples from any other suspected foci.
  - Considerations of whether to perform diagnostic imaging: one or more of the following: Chest X-ray, Ultra-sonic examination of suspected focus, Computerised Tomography of relevant areas, Magnetic Resonance imaging of relevant areas, other imaging techniques.
  - Surgical drainage of possible un-drained foci
  - Antimicrobial therapy expansion. Treatment will be guided by any relevant findings: microbial or diagnostic imaging, or other findings. If focus and micro organism of infection is not clear steps will be:
    - 1) Empirical sepsis treatment
    - 2) Empirical sepsis treatment with anaerobic and gram positive coverage
    - 3) Empirical sepsis treatment with anaerobic and gram positive coverage and/ or fungal treatment
- Subjects with PCT levels < 1.00 ng/ml will continue to receive standard-of-care
- Subjects with PCT levels  $\geq 1.00$  ng/ml and with a day-to-day PCT decrease of  $\geq 10\%$  will continue to receive standard-of-care.

Precise guidelines for this (antimicrobial) treatment will be made specifically for every ICU in concordance with the local choices regarding antimicrobial agents. For PCT guided diagnostics and treatment algorithm, see Diagram 1:

1  
2  
3  
4  
5  
6  
7  
8  
9  
10  
11  
12  
13  
14  
15  
16  
17  
18  
19  
20  
21  
22  
23  
24  
25  
26  
27  
28  
29  
30  
31  
32  
33  
34  
35  
36  
37  
38  
39  
40  
41  
42  
43  
44  
45  
46  
47  
48  
49  
50  
51  
52  
53  
54  
55  
56  
57  
58  
59  
60

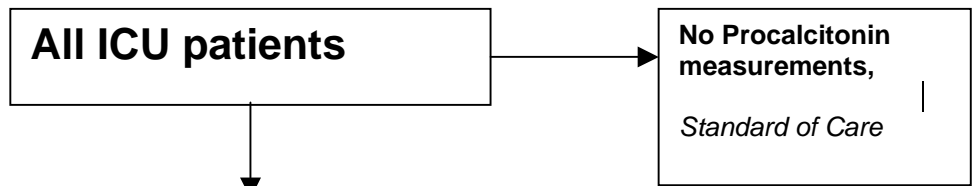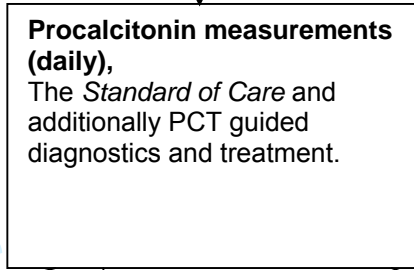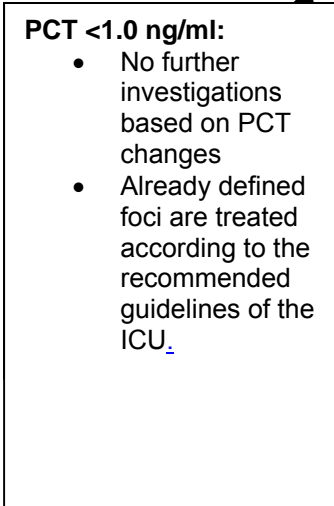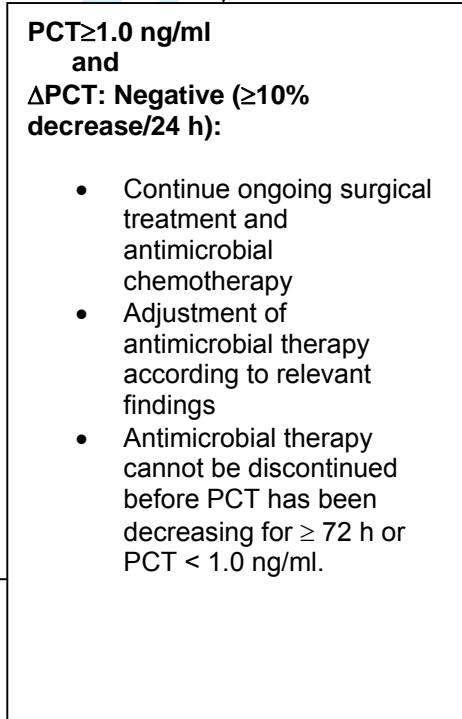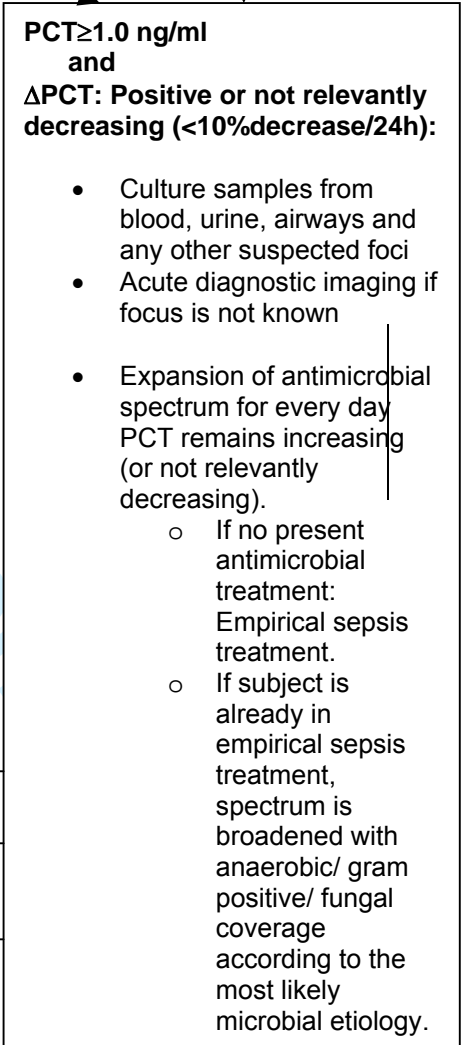

Continued increase or not relevant decrease

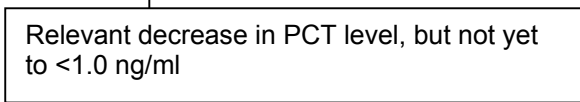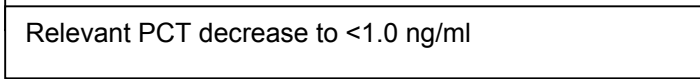

• Antimicrobial treatment is NOT to be discontinued if PCT is increasing and > 1.0 ng/ml  
 • When treatment of infection is relevant, PCT normally decreases in less than 18 h. If PCT is still not decreasing at the next-coming measurement after a therapy shift, a new (expanded) strategy is to be instituted

### 3.3.2 Change of PCT-guidance strategy during the trial

#### 3.3.2.1 Randomised PCT-guided interventions

Subjects may **discontinue** the interventions initiated on the basis of PCT measurements only in case the benefit: risk ratio for these interventions is not acceptable to the treating physician. The specific concern will be collected.

#### 3.3.2.2 The non-PCT guided interventions

The recommended interventions based on other information than PCT measurements should always be instituted and continued when relevant from a clinical judgement.

### 3.3.3 Antimicrobial Drugs and Dosages

All antimicrobial drugs prescribed on basis of an increasing PCT must be prescribed by the investigator or an intensive care physician, who has been sufficiently instructed in all aspects of the trial. The investigator must check for possible drug-drug interactions between any of the drugs prescribed guided by PCT changes and other agents that may be metabolised via the same enzyme systems or organs. To assist the investigator, information on this topic is included in the Manual of Operational Procedures. Also, the product label of each drug prescribed should be reviewed.

General principles that will be followed regarding antimicrobial therapy of sepsis are:

- Antimicrobial agents are prescribed, when possible, according to the resistance pattern of the causative microorganism.
- When the causative microorganism is not known, antimicrobial agents are prescribed according to knowledge of which microorganisms normally and possibly infect the suspected focus.
- When neither the microorganism nor the focus of infection is known, one or more broad spectrum antimicrobial agents are selected. If the effect is not sufficient, the spectrum of the used antimicrobial agents is additionally expanded, often with anaerobic active agents, gram positive active agents and antifungal agents. Conversely, if the effect is sufficient, the spectrum of used antimicrobial agents is narrowed according to knowledge of focus and causative microorganism.
- In empiric sepsis treatment, a combination of a  $\beta$ -lactam/ Carbapenem + a fluor-quinolone is chosen if not contra indicated in the specific subject. This treatment can be

1  
2  
3 supplemented with nitroimidazoles, glycopeptides, oxazolidinones and azoles. More  
4 specific treatment regimes are initiated and guided by findings regarding the causative  
5 microorganism and/or focus of infection.  
6  
7

8  
9 Dosages of antibiotics are decided according to the recommendations of the specific  
10 ICU.  
11

12  
13 The toxicity management guidelines detailed below refer to all components of the antimicrobial  
14 treatment used in the trial.  
15  
16

### 17 18 19 **3.3.3.1 Overdose and Toxicity**

20 Antimicrobial agents may be interrupted because of the development of adverse events (AEs,  
21 see section 6.1 for definitions) at the discretion of the investigator and according to the severity  
22 of the AE. The dose of all antimicrobial drugs may be reduced, interrupted or reintroduced  
23 according to standard practice at the time, and depending on the severity of the AE.  
24  
25  
26

27  
28 Subjects who require a dose modification should be re-evaluated on a daily basis.  
29

30  
31 The investigator is responsible for taking appropriate precautions to ensure that the risk of  
32 developing toxicity is minimised, that the subject is monitored for the development of toxicity,  
33 and if such toxicities do occur, take appropriate action to minimise their effects.  
34  
35  
36  
37  
38  
39  
40  
41  
42  
43  
44  
45  
46  
47  
48  
49  
50  
51  
52  
53  
54  
55  
56  
57  
58  
59  
60

## 4 MEASUREMENTS AND EVALUATION

### 4.1 Time and Events Schedule

A flow chart showing the timing of trial procedures (Clinical and Laboratory) is shown in Table 1.

An initial pre-entry (screening) assessment for eligibility will be performed as soon as possible after the patient is admitted to the ICU. The patient should be randomised no later than 24 hours after the time of admission. Evaluations will then be carried out at entry (Day 1), and thereafter daily as long as the patients remains in the ICU. After discharge, the course of disease is collected in less detail and the survival status determined day 28, 60, 90 and 180 after enrolment in the trial.

#### 4.1.1 Pre-entry Evaluations

The site must obtain subject consent in the form of a written informed consent form prior to the initiation of **any** pre-entry procedures as outlined in this protocol. The consent form must be approved by the IEC of each participating site.

The pre-entry evaluation will be conducted the first day of the trial by an investigator in the ICU and will include an evaluation of whether the patient fulfils the requirements for enrolment in this trial (see section 3.2.2 and 3.2.3).

Subjects who fail to meet the entry criteria may not be re-screened for this protocol until 28 days after the failed pre-entry evaluation. Hence, enrolment of such patients will require that the patient is re-admitted to the ICU after at least 7 days outside of the ICU after the time of the first screening.

#### 4.1.2 Baseline (Day 1) Evaluations

The following evaluations should be performed at baseline (Day 1):

Note: For this trial, Baseline (Day 1) is defined as the day on which the subject has his/her first blood sample for PCT measurement. The following data are to be collected on day 1:

- Demography including date of birth, weight, height, and indication for admittance to the ICU
- Infections found in the subject in this hospital admission prior to admittance to the ICU.
- Present infection focus/ etiologic microorganism

- 1  
2  
3  
4  
5  
6  
7  
8  
9  
10  
11  
12  
13  
14  
15  
16  
17  
18  
19  
20  
21  
22  
23  
24  
25  
26  
27  
28  
29  
30  
31  
32  
33  
34  
35  
36  
37  
38  
39  
40  
41  
42  
43  
44  
45  
46  
47  
48  
49  
50  
51  
52  
53  
54  
55  
56  
57  
58  
59  
60
- APACHE II score (Temperature, Mean Arterial Pressure, Heart Rate, Respiratory Rate, FIO<sub>2</sub>, HCO<sub>3</sub><sup>-</sup>, pH (arterial), Se- Na<sup>+</sup>, K<sup>+</sup>, Creatinine, Haematocrite, White Blood Count+ differential count, Glasgow Coma Scale)
  - Current medical conditions
  - Pre-admittance daily function and health state:
 

|                      |                                                                                                                                                                                                                                                                                                              |
|----------------------|--------------------------------------------------------------------------------------------------------------------------------------------------------------------------------------------------------------------------------------------------------------------------------------------------------------|
| Professional career: | 1) Student, 2) Part time work, 3) Full time work,<br>4) Early retirement, 5) Retired                                                                                                                                                                                                                         |
| Health:              | 1) Congenital handicapped, 2) Acquired handicap,<br>3) Chronic disabling disease, 4) Chronic non-<br>disabling disease, 5) Healthy                                                                                                                                                                           |
| Self-supportance:    | 1) Lives in nursing home, 2) Lives in a flat<br>connected to a nursing home, 3) Own home with<br>external help ≥ once / day, 4) Own home with<br>external help < once daily, 5) Own home, no help<br>required                                                                                                |
| Hospital need:       | 1) ≥ 3 months admitted to a hospital/ last year, 2) 1-<br>3 months admitted to a hospital/ last year 3) 1-30<br>days admitted/ last year, 4) No admissions,<br>ambulatory visits ≥ 6/ last year, 5) No admissions,<br>ambulatory visits 1-5/ last year, 6) No admissions,<br>No ambulatory visits/ last year |
  - Adverse events/ other complications to treatment given in this hospital admission (ongoing clinical conditions at Day 1 shall be recorded in the “Adverse Event and Medical Condition Form” of the CRF at this time, regardless of the fact that such conditions may not subsequently be found to fulfil the definitions for an adverse event (see section 6.1))
  - Haematology: *haemoglobin, platelet count (WBC count mentioned as part of APACHE II)*
  - Clinical chemistry: Albumin, Bilirubin, Factor 2-7-9, Alanin Amino Transferase (ALAT)/ Aspartate Amino Transferase (ASAT), Alcaline Phosphatase, Creatinine, Carbamide, Na<sup>+</sup>, K<sup>+</sup>, Phosphate, Ca<sup>2+</sup>, C-reactive protein (some are also mentioned as part of APACHE II).



1  
2  
3 • Baseline PCT  
4  
5

6 The daily PCT determination is done real-time at the Department of Clinical Biochemical  
7 Department, Hvidovre Hospital, using the EC-approved measuring instruments and reagents.  
8 For each subject, the same methodology should be used throughout the trial period. The  
9 KRYPTOR® PCT BRAHMS sensitive assay is the accepted standard assay. Other licensed  
10 assays may be used instead if judged by the PASS steering committee to have a comparable  
11 performance compared to the indicated assay.  
12  
13  
14  
15

16  
17 **4.2 On Trial Evaluations**

18 On trial assessments will be completed at the following time-points unless otherwise specified:  
19

20  
21 While admitted to the ICU, the following information will be registered unless specified  
22 otherwise:  
23

24  
25 **Daily while patient is admitted to the ICU:**  
26

- 27  
28 • Clinical signs of new (nosocomial) infections  
29  
30 • Microbiological or radiological evidence of new (nosocomial) infection  
31  
32 • Defined Day Doses of antimicrobial chemotherapy  
33  
34 • APACHE II score (Temperature, Mean Arterial Pressure, Heart Rate, Respiratory Rate,  
35 FIO<sub>2</sub>, HCO<sub>3</sub><sup>-</sup>, pH (arterial), Se- Na<sup>+</sup>, K<sup>+</sup>, Creatinine, Haematocrite, White Blood Count+  
36 differential count, Glasgow Coma Scale)  
37  
38 • Occurrence of sepsis, severe sepsis, septic shock, DIC. Assessment of Glasgow Coma  
39 Scale, measurement of Blood Pressure (systolic blood pressure < 90), days with artificial  
40 ventilation, Factor 2-7-9 < 0.7, creatinine (increase factor 3 from baseline), MODS.  
41  
42 • Adverse events/ other complications to treatment given in the ICU (ongoing clinical  
43 conditions at Day 1 shall be recorded in the “Adverse Event and Medical Condition Form” of  
44 the CRF at this time, regardless of the fact that such conditions may not subsequently be  
45 found to fulfil the definitions for an adverse event (see section 6.1))  
46  
47 • Haematology: haemoglobin, platelet count WBC (WBC count also mentioned as part of  
48 APACHE II)  
49  
50 • Clinical chemistry: Albumin, Bilirubin, Factor 2-7-9, Alanin Amino Transferase (ALAT)/  
51 Aspartate Amino Transferase (ASAT), Alcaline Phosphatase, Creatinine, Carbamide, Na<sup>+</sup>,  
52 K<sup>+</sup>, Phosphate, Ca<sup>2+</sup>, C-reactive protein (some are also mentioned as part of APACHE II).  
53  
54  
55  
56  
57  
58  
59  
60



Procalcitonin and Survival Study (PASS)

Version: 3.0  
18.June 2006

- Blood sample for PCT determination
- Diagnostic imaging procedures performed
- Non-routine microbiological sample taken
- Surgical procedures performed
- Change in antimicrobial chemotherapy

**At the day of discharge from ICU or day of death or later:**

- Mortality and time of death, and the cause hereof
- AUC<sub>Procalcitonin</sub> (at discharge from the ICU) (will remain blinded in the control arm)
- Discharge and post-discharge daily function and health state (obtained on day 30 and 180):

Professional career: 1) Student, 2) Part time work, 3) Full time work,  
4) Early retirement, 5) Retired

Health: 1) Congenital handicapped, 2) Acquired handicap,  
3) Chronic disabling disease, 4) Chronic non-  
disabling disease, 5) Healthy

Self-supportance: 1) Lives in nursing home, 2) Lives in a flat  
connected to a nursing home, 3) Own home with  
external help  $\geq$  once / day, 4) Own home with  
external help  $<$  once daily, 5) Own home, no help  
required.

Hospital need: 1)  $\geq$  3 months admitted to a hospital/ last year, 2) 1-  
3 months admitted to a hospital/ last year 3) 1-30  
days admitted/ last year, 4) No admissions,  
ambulatory visits  $\geq$  6/ last year, 5) No admissions,  
ambulatory visits 1-5/ last year, 6) No admissions,  
No ambulatory visits/ last year

**After discharge from ICU while patient is still admitted to hospital**

- Clinical signs of new (nosocomial) infections

## Procalcitonin and Survival Study (PASS)

- Microbiological or radiological evidence of new (nosocomial) infection
- Defined Day Doses of antimicrobial chemotherapy
- Current medical conditions (including acute organ failures)
- Diagnostic imaging procedures performed
- Surgical procedures performed
- Blood sample for PCT determination – done daily

### 4.3 Trial drugs

Drugs prescribed on basis of PCT levels and changes belong to following categories: Antibacterial chemotherapeutics and Antifungal chemotherapeutics. Drugs from these categories will also be prescribed for the control group (and in patients not included in the trial), when indicated from other findings than level/change of PCT. An exhaustive list of drugs, used in the participating ICU's (and thereby also in the trial subjects and controls) is given in appendix

#### 4.3.1 Dosing Details

The following details on dosing of all prescribed antimicrobials during the study period must be recorded in the "Medication form" in the CRF.

- Date of initial therapy
- Dose at each dosing change, together with reason for change
- Date of last dose of each agent
- Reason for discontinuation
- Date of resumption of therapy

#### 4.3.2 Collection of Blood Samples for Daily Analysis

Plasma from the PCT group and the control group will be collected early each morning (01.00 a.m.-06.00 a.m.) and will be transported to the Department of Clinical Microbiology Hvidovre Hospital, DK-2650 Hvidovre (or other laboratories, that can provide a PCT analysis real-time and with an analysing method which is approved by the PASS coordinating centre) and analysed immediately hereafter. The results from this analysis will be communicated via a

1  
2  
3 webbased cryptized licensed answering system every day to the Intensive Care Units for  
4 patients randomised to the PCT intervention arm or concealed for patients randomised to the  
5 control arm. Remaining material for the blood samples will hereafter be frozen for later analysis  
6 of other biochemical, biological and genetic markers (-80°C). Once the trial has been  
7 completed, the coupling of these samples to person-identifiers will be broken, and hence  
8 subsequent analyses done without any possibility to connect the results to individual persons  
9 involved in the trial. For detailed instructions regarding the collection, labelling, processing and  
10 transport of samples, see the Manual of Operational Procedures.

11  
12 It is the responsibility of the investigator (to be assisted by the courier service and PASS  
13 coordinating office) to ensure that all trial samples for transport are appropriately handled,  
14 packed and transported.

#### 25 26 **4.3.3 Genetic markers (PASS-sub-study)**

27 The PASS-sub-study has three aims: 1. quality assessment of the procalcitonin analyzes used  
28 in the PASS-Study, 2. to investigate the relation between levels of procalcitonin and other  
29 biomarkers and 3. to investigate if genetic markers can be used to gain an early knowledge of  
30 the course of critical illness.

31  
32 To investigate this, we will use the remaining material from the blood samples collected for the  
33 PASS-Study. Blood plasma and DNA material will be frozen at minus 80 degrees Celcius. The  
34 PASS-Sub-study, therefore, will not mean any inconvenience for the study subjects and no  
35 additional blood sampling. This material will be kept in anonymous form for 5 years after the  
36 closure of the PASS-Study. Known hereditary diseases will not be examined.

37  
38 Regarding 1.: In a randomly assigned set of blood samples, and additionally in samples that  
39 have shown extreme PCT values a double determination will be performed to assess the inter-  
40 assay variability.

41  
42 Regarding 2.: Other biomarkers as interleukin-6 and soluble TNF- $\alpha$  receptor have been, and are  
43 still under assessment as predictive markers at sepsis and in other infectious diseases. In  
44 plasma, these and other markers will be analyzed after the closure of the PASS-Study to  
45 assess the value of these markers compared to PCT, also as prognostic markers.

46  
47 Regarding 3.: Genetic polymorphisms (e.g. mannan-binding lectins, interleukins, complement,  
48 immunoglobulin receptor, Toll-like receptor 1-9, and Factor V Leiden) are related to the prognosis  
49 at sepsis and can, to some degree, identify patient groups with a high risk of a fatal course of  
50

the disease. An increasing number of international studies have during the latest years investigated the relation between the genetic disposition of patients and the course of infectious diseases, but often, these studies have been small and without sufficient statistical power to conclude on these issues.

The statistical power in investigating the relation between genetic polymorphisms and mortality in sepsis depends on the frequency of a certain allele, the mortality in the study population and the size of the population.

Directly applied on the study population of the PASS-Study with 1000 cases of sepsis (mortality ~25%) it will result in a 80 % statistical power to show a 2-fold increase in mortality for an allele that is found in 3% of the population. For alleles that are more frequent, we will be able to show less than a 2-fold increase in mortality. As an example of this, the homozygote forms of TNF- $\alpha$ , IL-1 $\beta$ , and PAI-1 have a frequency of 5, 7, and 14%, respectively. Heterozygote forms of TLR4 and factor V Leiden have a frequency of 9 and 7%.

## 5 DATA ANALYSIS METHODS

### 5.1 Sample Size Determination

The trial will randomise (1:1) 1,000 subjects into two treatment arms:

- 1: Control arm
- 2: The PCT guided intervention arm

With a sample size of 500 per group and an assumed mortality rate of 25% in the control group and 17.5 % in the PCT group there will be 80% probability that a negative result (Confirming the Null Hypothesis) is true. At the same time there will be < 5% probability of falsely declaring the alternative hypothesis correct. [Power 80%, stringency 5%]. Sample Size calculations via Dept. of Statistics, UCLA, California, USA.

### 5.2 General Considerations

#### 5.2.1 Analysis Populations

The primary population for analyses of the efficacy and safety data will be the intention to treat population, including all randomised subjects who have at least one blood sample made for PCT measurements.

Response to PCT guided diagnostic and therapeutic interventions will also be investigated descriptively by summary statistics for various sub-groups, e.g. gender, other demographic variables, Baseline APACHE II score, and pre-admittance health assessment.

### 5.2.2 Interim Analysis

Safety and efficacy data will be reviewed when 250, 500 and 750 subjects have completed the trial period (until discharge from the hospital or death, maximally 28 days), or at least every 6 th month, and assessments will be made by an independent Data and Safety Monitoring Board (DSMB). A cut-off date will be specified at this point and all treatment failure and adverse event data before this date will be used.

The Peto method of repeated significance testing will be used to test for treatment difference and a p-value of 0.001 will be used as the significance level at the interim analysis, giving a significance level of 0.05 for the final analysis once all patients have completed the trial.

Stopping the trial will not be based purely on a statistical decision but also on the recommendation of the DSMB.

### 5.2.3 Other Issues

All subjects will remain in the trial and be followed-up until day 180.

## 5.3 Efficacy

### 5.3.1 Primary Efficacy Endpoint

The primary efficacy analysis will be the comparison of the two treatment groups with respect to the incidence of mortality within 28 days after enrolment in the trial. Mortality is defined as all-cause mortality. Subjects not followed for the entire duration of the trial (i.e. lost to follow-up) will be counted as survivors. Very few patients will be lost to follow up for the primary endpoint, because of the Danish Central Person Register (CPR), where all deaths in Denmark are registered. Only subjects who permanently move their address to another country within 30 days after ICU admission can be lost to follow-up. The stratified log-rank test and Kaplan Meier estimates will be used.

### 5.3.2 Secondary Efficacy Endpoint(s)

#### 5.3.2.1 Other mortality assessments

The proportion of subjects, who survive to different points of time (at discharge, after 60, 90 and 180 days, counting after ICU admission). The log rank test and Kaplan-Meier estimates will be used. Differences in proportions of survivors will be assessed using the Mantel-Haenzel Chi Square test and Wilcoxon test. Subjects with missing mortality data will be classified as survivors.

### 5.3.2.2 Other parameters than mortality

- Defined day doses of antimicrobial therapy in each arm
- Occurrence of sepsis, severe sepsis, septic shock, DIC. Assessment of Glasgow Coma Scale, measurement of Blood Pressure (systolic blood pressure < 90), days with artificial ventilation, Factor 2-7-9 < 0.7, creatinine (increase factor 3 from baseline), MODS.
- SOFA score daily (Temperature, Mean Arterial Pressure, Heart Rate, Respiratory Rate, FIO<sub>2</sub>, HCO<sub>3</sub><sup>-</sup>, pH (arterial), Se- Na<sup>+</sup>, K<sup>+</sup>, Creatinine, Haematocrite, White Blood Count+ differential count, Glasgow Coma Scale).
- AUC<sub>Procalcitonin</sub> for the Procalcitonin-measuring group and for the control group.
- Number of diagnostic images after admission to the ICU.
- Number of non-routine microbiological sample taken after admittance to the ICU.
- Number of surgical procedures during the trial
- Time to the first change in antimicrobial chemotherapy after admittance to the ICU
- Occurrence of new clinically, microbiologically or radiologically diagnosed infections while admitted to the ICU
- Discharge and post-discharge daily function and health state

For endpoints that have normally distributed numbers, t-test will be used in assessment of statistical significance. If not normally distributed, Mantel-Haenzel Chi Square test and the Wilcoxon test, will be used.

Exploratory analysis of adjustments for possible confounders present at baseline for the analysis presented above will be performed using Cox proportional hazards and Logistic regression modelling (as appropriate).

### 5.3.3 Combined evaluation of mortality / occurrence of serious bacterial infection while admitted to the ICU

The proportion of patients who die during the trial period or who experience occurrence of a serious bacterial infection (sepsis, severe sepsis, septic shock, Disseminated Intravascular Coagulation (DIC) or Multi Organ Dysfunction Syndrome (MODS) (which ever came first) as a function of time since trial initiation. In this analysis, patients discontinuing the randomised treatment for other reasons before having failed in this analysis will be censored from the time of discontinuation.

#### 5.4 Safety

Adverse events will be tabulated by treatment group, maximum intensity, attributability to various antimicrobial agents and by seriousness. Treatment related adverse events that lead the subject to prematurely discontinue one or more of the originally prescribed antimicrobial agents will also be summarised.

Clinical chemistry and haematology results will be presented by summary statistics and quartile plots of measured results. Change from baseline for these results will also be presented.

Baseline is defined as the laboratory data collected at Day 1 (before the first blood sample for PCT analysis). Subjects must have both a baseline and an "on treatment" measurement to be included in the change from baseline analysis.

Treatment emergent toxicity grades will be presented for each graded laboratory parameter by treatment group. A graded toxicity is considered treatment emergent if it develops or increases in intensity, post Day 1. Treatments will include established and approved antimicrobial treatments, which are already used daily in the participating ICU's.

Concurrent medications and blood products will be summarised by randomised treatment group.

## 6 ADVERSE EVENTS (AE) AND SERIOUS ADVERSE EVENTS (SAE)

As mentioned other places in this protocol, the direct inconvenience for subjects in this study is sampling of 7 ml of whole blood daily in the same session as the routine blood samples are made, every morning. Therefore it is reasonable to expect that AE's and SAE's as a direct consequence of this blood sampling will not occur. Indirect AE's as a consequence of potential overly treatment are likewise not likely to occur according to the available literature on the issue, especially because the most striking result of the previously published RCT's is a reduction of antibiotic exposure in the PCT-guided group.

*All interventions, that are performed in this study are well-known, thoroughly tested and accepted treatments, so it does not seem reasonable to apply the same procedures for this study regarding AE's as e.g. a study where a new drug is to be assessed for safety (or effect)*

*Investigators will, however, have the opportunity to report events, that they find unexpected in the Case Report Form. In this part of the CRF, it is possible to classify unexpected events in groups of "relatedness" to the antimicrobial treatment as "no relation", "unlikely relation", "possibly related", "probably related" or "definitely related".*



### **Serious unexpected events or unexpected events**

Serious unexpected events and unexpected events, that can be related to the antimicrobial treatment will in both treatment groups be reported to the Danish Medicines Agency "Lægemedelstyrelsen" according to the Danish legislation on this point

The primary and the secondary endpoints that are registered daily in the case report form are all *adverse events or serious adverse events, i.e. death, complications to sepsis, increased antibiotic exposition and prolonged hospital stay. These are registered routinely and daily in the part of the CRF dealing with effects of the treatments. All patients are at inclusion in the study threatened by potentially lethal illnesses.*

## **7 TRIAL ADMINISTRATION**

### **7.1 Data Collection**

Case Report Forms (CRF) will be provided for each subject by the PASS coordinating centre. All data on the CRFs must be entered legibly in black ink or typed, in Danish or English. Amendments and errors on the CRFs should not be erased, covered with correction fluid or completely crossed-out; rather, a single line should be drawn through the error and the correction initialled and dated by the investigator, authorised colleague or co-worker. An explanatory note for the change should also be written on the CRF. Any requested information which is not obtained or unanswerable should be identified by entering 'ND' (not done). An explanation must be documented for any missing data. CRFs must be completed regularly and should never bear the participant's name. Participants will be identified by initials, date of birth and subject trial number only.

The investigator (or a person appointed by the investigator) must sign and date a declaration on the CRF attesting to his/her responsibility for the quality of all data recorded and that the data represents a complete and accurate record of each subject's participation in the trial.

Details and procedures for the completion of the CRFs are specified in the Manual of Operational Procedures.

All trial CRFs will be plain paper copies – the original being the investigators copy. After completion of each page of the CRF, the investigator will send it by fax to the PASS coordinating centre. Pages will be reviewed and clarified in accordance with the protocol specific Review and Validation Manual. The data will be double entered (punched and verified) by separate data entry specialists to produce data files.



1  
2  
3 Identical validation checks will be performed on each database. Data failing any check will be  
4 flagged for output on a Data Clarification Report (DCR) and sent to the relevant investigator for  
5 resolution. In such cases the investigator is requested to sign and date any explanation or  
6 correction. On return, the database will be updated appropriately and the original DCR stored  
7 with the original CRF.  
8  
9

10  
11  
12 The database(s) will be subject to agreed Quality Control (QC) checks before authorisation. The  
13 data will be subsequently analysed according to the methods outlined in Section 5.  
14  
15

## 16 17 **7.2 Regulatory and Ethical Considerations**

### 18 19 **7.2.1 Regulatory Authority Approval**

20  
21 The co-ordinator (in collaboration with the PASS coordinating centre) will obtain approval from  
22 the appropriate regulatory agency prior to initiating the trial at a site.  
23  
24

25  
26 This trial will be conducted in accordance with ICH-GCP and all applicable regulations,  
27 including, where applicable, the Declaration of Helsinki, June 1964, as modified by 52nd WMA  
28 General Assembly, Edinburgh, Scotland, October 2000 (see Appendix 1).  
29  
30

### 31 32 **7.2.2 Ethics Approval**

33  
34 It is the investigator's responsibility to ensure that this protocol is reviewed and approved by the  
35 appropriate local Independent Ethics Committee (IEC). The IEC must also review and approve  
36 the site's informed consent form (ICF) and any other written information provided to the subject  
37 prior to any enrolment of subjects, and any advertisement that will be used for subject  
38 recruitment. The co-ordinator and/or the investigator must forward to the PASS coordinating  
39 centre copies of the IEC approval and the approved informed consent materials, which must be  
40 received by the PASS coordinating centre prior to the start of the trial.  
41  
42

43  
44 If, during the trial, it is necessary to amend either the protocol or the informed consent form, the  
45 co-ordinator and/or investigator will be responsible for ensuring the IEC reviews and approves  
46 these amended documents. IEC approval of the amended ICF must be obtained before new  
47 subjects consent to take part in the trial using this version of the form. Copies of the IEC  
48 approval of the amended ICF and the approved amended ICF must be forwarded to the PASS  
49 coordinating centre as soon as available.  
50  
51

### 52 53 **7.2.3 Subject Informed Consent**

54  
55 The investigator or his/her designee will inform the subject of all aspects pertaining to the  
56 subject's participation in the trial.  
57  
58

1  
2  
3 The process for obtaining subject informed consent will be in accordance with all applicable  
4 regulatory requirements. The investigator or his/her designee and the subject/ witness of an oral  
5 informed consent/ subjects legally acceptable representative must both sign and date the ICF  
6 before the subject can participate in the trial. Following types of informed consent can be  
7 accepted because of the nature of the ICU setting and the physical and/ or mental state of the  
8 subjects.  
9

10  
11  
12  
13  
14 1)Ability to understand and provide written informed consent to participate in this trial,

15  
16 **or**

17  
18 2)Ability to understand and provide oral informed consent in presence of at least one  
19 impartial witness who should sign and personally date the consent form

20  
21 **or**

22  
23 3)The subjects legally acceptable representative can understand and provide written  
24 informed consent if the subject is not capable of this because of the present mental or  
25 physical condition of the subject.  
26  
27  
28  
29  
30

31  
32 The subject will receive a copy of the signed and dated form and the original will be retained in  
33 the site trial records. The decision regarding subject participation in the trial, that is made by the  
34 subject, is entirely voluntary. The investigator or his/her designee must emphasize to the  
35 subject that consent regarding trial participation may be withdrawn at any time without penalty  
36 or loss of benefits to which the subject is otherwise entitled.  
37  
38  
39

40  
41 If the ICF is amended during the trial, the investigator must follow all applicable regulatory  
42 requirements pertaining to approval of the amended ICF by the IEC and use of the amended  
43 form (including for ongoing subjects).  
44  
45  
46  
47  
48  
49

### 50 **7.3 Trial Monitoring**

51 In accordance with applicable regulations, good clinical practice (GCP), monitors will  
52 periodically contact the site, including conducting on-site visits. The extent, nature and  
53 frequency of on-site visits will be based on enrolment rate, the quality of the documents  
54 provided by the site, consistency of follow-up of the patients according to this protocol.  
55  
56  
57

58 During these contacts, the monitor will:  
59  
60

- check and assess the progress of the trial

- review trial data collected
- conduct Source Document Verification
- identify any issues and address their resolution

This will be done in order to verify that the:

- data are authentic, accurate, and complete
- safety and rights of subjects are being protected
- trial is conducted in accordance with the currently approved protocol (and any amendments), GCP, and all applicable regulatory requirements

The investigator agrees to allow the monitor direct access to all relevant documents and to allocate his/her time and the time of his/her staff to the monitor to discuss findings and any relevant issues.

In addition to contacts during the trial, the monitor will also contact the site prior to the start of the trial to discuss the protocol and data collection procedures with site personnel.

At trial closure, monitors will also conduct all activities as indicated in Section 7.5, Trial and Site Closure.

#### **7.4 Quality Assurance**

At its discretion, the PASS coordinating centre may conduct a quality assurance audit of this trial. If such an audit occurs, the investigator agrees to allow the auditor direct access to all relevant documents and to allocate his/her time and the time of his/her staff to the auditor to discuss findings and any relevant issues. A guideline for audit is available at the PASS coordinating centre.

In addition, regulatory agencies may conduct a regulatory inspection of this trial. If such an inspection occurs, the investigator agrees to allow the inspector direct access to all relevant documents and to allocate his/her time and the time of his/her staff to the inspector to discuss findings and any relevant issues.

#### **7.5 Trial and Site Closure**

Upon completion of the trial, the following activities, when applicable, must be conducted by the monitor in conjunction with the investigator, as appropriate:

- return of all trial data to the PASS coordinating centre

Procalcitonin and Survival Study (PASS)

- data clarifications and/or resolutions
- review of site trial records for completeness
- shipment of stored samples to assay laboratory

In addition, the steering committee reserves the right to temporarily suspend or prematurely discontinue this trial either at a single site or at all sites at any time and for any reason. If such action is taken, selected members of the PASS steering committee and/or the PASS coordinating centre will discuss this with the Investigator (including the reasons for taking such action) at that time. The PASS coordinating centre will promptly inform all other investigators conducting the trial if the trial is suspended or terminated for safety reasons. The investigators will inform their local/regional/national regulatory authorities (as appropriate) of the suspension or termination of the trial and the reason(s) for the action. If required by applicable regulations, the investigator must inform the IEC promptly and provide the reason for the suspension or termination.

If the trial is prematurely discontinued, all trial data must be returned to the PASS coordinating centre.

## 7.6 Records Retention

In accordance with applicable regulatory requirements, following closure of the trial, the investigator will maintain a copy of all site trial records in a safe and secure location. The PASS coordinating centre will inform the investigator of the time period for retaining these records in order to comply with applicable regulatory requirements.

## 7.7 Information Disclosure and Inventions

### 7.7.1 Confidentiality

The investigator and other trial site personnel will keep confidential any information provided by the co-ordinating centre (including this protocol) related to this trial and all data and records generated in the course of conducting the trial, and will not use the information, data, or records for any purpose other than conducting the trial. These restrictions do not apply to: (1) information which becomes publicly available through no fault of the investigator or trial site personnel; (2) information which it is necessary to disclose in confidence to an IEC solely for the evaluation of the trial; or (3) information which it is necessary to disclose in order to provide appropriate medical care to a trial subject.

### 7.7.2 Publication

The findings from this trial is intended to be published in peer-reviewed journals. The steering committee decides whether abstracts are to be submitted to conferences, and how the results are distributed if more than one manuscript is to be drafted.

**Authorship:** The trial group as a whole will appear in an appendix in all published manuscripts. Co-authors are selected after a fair evaluation of primarily number of patients entered in to the trial and the level of involvement in the drafting of the manuscript. Providing that several manuscripts are to be drafted, a fair rotation among the participating clinical sites of co-authorship slots will be done taking in to consideration the number of patients enrolled.

### 7.8 Indemnification and Compensation for Injury

The insurance that covers liability in relation to patient care in Denmark, *Patientforsikringen* will cover all liability aspects of the conduct of this trial<sup>45-46</sup>.

## 8. REFERENCES

- 1: Garnacho-Montero J, Garcia-Garmendia JL, Barrero-Almodovar A, Jimenez-Jimenez FJ, Perez-Paredes C, Ortiz-Leyba C. Impact of adequate empirical antibiotic therapy on the outcome of patients admitted to the intensive care unit with sepsis. *Crit Care Med* 2003;3:2742-51.
- 2: Alberti C, Brun-Buisson C, Burchardi H, Martin C, Goodman S, Artigas A, Sicignano A, Palazzo M, Moreno R, Boulme R, Lepage E, Le Gall R. Epidemiology of sepsis and infection in ICU patients from an international multicentre cohort study. *Intensive Care Med.* 2002 Feb;28(2):108-21. Epub 2001 Dec 04.
- 3: Alberti C, Brun-Buisson C, Goodman SV, et al. European Sepsis Group. Influence of systemic inflammatory response syndrome and sepsis on outcome of critically ill infected patients. *Am J Respir Crit Care Med* 2003;168:77-84. Epub 2003 Apr 17.
4. Azoulay E, Alberti C, Legendre I, Brun Buisson C, Le Gall JR. Post-ICU mortality in critically ill infected patients: an international study. *Intensive Care Med.* 2004 Nov 4; [Epub ahead of print]
5. Iapichino G, Morabito A, Mistraretti G, Ferla L, Radrizzani D, Reis Miranda D. Determinants of post-intensive care mortality in high-level treated critically ill patients. *Intensive Care Med.* 2003 Oct;29(10):1751-6. Epub 2003 Aug 16.
6. Moreno R, Miranda DR, Matos R, Feveireiro T. Mortality after discharge from intensive care: the impact of organ system failure and nursing workload use at discharge. *Intensive Care Med.* 2001 Jun;27(6):999-1004.
7. Azoulay E, Adrie C, De Lassence A, Pochard F, Moreau D, Thiery G, Cheval C, Moine P, Garrouste-Orgeas M, Alberti C, Cohen Y, Timsit JF. Determinants of postintensive care unit mortality: a prospective multicenter study. *Crit Care Med.* 2003 Feb;31(2):428-32.
- 8: Assicot M, Gendrel D, Carsin H, Raymond J, Guilbaud J, Bohuon C. High serum procalcitonin concentrations in patients with sepsis and infection. *Lancet* 1993;341:515-8.
9. Ittner L, Born W, Rau B, Steinbach G, Fischer JA. Circulating procalcitonin and cleavage products in septicaemia compared with medullary thyroid carcinoma. *Eur J Endocrinol.* 2002 Dec;147(6):727-31.
10. Redl H, Schlag G, Togel E, Assicot M, Bohuon C. Procalcitonin release patterns in a baboon model of trauma and sepsis: relationship to cytokines and neopterin. *Crit Care Med.* 2000 Nov;28(11):3659-63.
11. Nijsten MW, Olinga P, The TH, de Vries EG, Koops HS, Groothuis GM, Limburg PC, ten Duis HJ, Moshage H, Hoekstra HJ, Bijzet J, Zwaveling JH. Procalcitonin behaves as a fast responding acute phase protein in vivo and in vitro. *Crit Care Med.* 2000 Feb;28(2):458-61.
12. Chirouze C, Schuhmacher H, Rabaud C, Gil H, Khayat N, Estavoyer JM, May T, Hoen B. Low serum procalcitonin level accurately predicts the absence of bacteremia in adult patients with acute fever. *Clin Infect Dis.* 2002 Jul 15;35(2):156-61. Epub 2002 Jun 17.
13. Reny JL, Vuagnat A, Ract C, Benoit MO, Safar M, Fagon JY. Diagnosis and follow-up of infections in intensive care patients: value of C-reactive protein compared with other clinical and biological variables. *Crit Care Med.* 2002 Mar;30(3):529-35.
14. Balci C, Sungurtekin H, Gurses E, Sungurtekin U, Kaptanoglu B. Usefulness of procalcitonin for diagnosis of sepsis in the intensive care unit. *Crit Care.* 2003 Feb;7(1):85-90. Epub 2002 Oct 30.
15. Hatherill M, Tibby SM, Turner C, Ratnavel N, Murdoch IA. Procalcitonin and cytokine levels: relationship to organ failure and mortality in pediatric septic shock. *Crit Care Med.* 2000 Jul;28(7):2591-4.
16. Hatherill M, Tibby SM, Sykes K, Turner C, Murdoch IA. Diagnostic markers of infection: comparison of procalcitonin with C reactive protein and leucocyte count. *Arch Dis Child.* 1999 Nov;81(5):417-21.

- 1  
2  
3  
4  
5  
6  
7  
8  
9  
10  
11  
12  
13  
14  
15  
16  
17  
18  
19  
20  
21  
22  
23  
24  
25  
26  
27  
28  
29  
30  
31  
32  
33  
34  
35  
36  
37  
38  
39  
40  
41  
42  
43  
44  
45  
46  
47  
48  
49  
50  
51  
52  
53  
54  
55  
56  
57  
58  
59  
60
- 17: Meisner M, Rauschmayer C, Schmidt J, et al. Early increase of procalcitonin after cardiovascular surgery in patients with postoperative complications. *Intensive Care Med* 2002;28:1094-102. Epub 2002 Jul 06.
- 18: Adamik B, Kubler-Kielb J, Golebiowska B, Gamian A, Kubler A. Effect of sepsis and cardiac surgery with cardiopulmonary bypass on plasma level of nitric oxide metabolites, neopterin, and procalcitonin: correlation with mortality and postoperative complications. *Intensive Care Med* 2000;26:1259-67.
- 19: Lindberg M, Hole A, Johnsen H, et al. Reference intervals for procalcitonin and C-reactive protein after major abdominal surgery. *Scand J Clin Lab Invest* 2002;62:189-94.
- 21: Aouifi A, Piriou V, Blanc P, et al. Effect of cardiopulmonary bypass on serum procalcitonin and C-reactive protein concentrations. *Br J Anaesth.* 1999;83:602-7.
- 22: Conlon JM, Grimelius L, Thim L. Structural characterization of a high-molecular-mass form of calcitonin [procalcitonin-(60-116)-peptide] and its corresponding N-terminal flanking peptide [procalcitonin-(1-57)-peptide] in a human medullary thyroid carcinoma. *Biochem J* 1988;256:245-50.
- 23: Birnbaum RS, Mahoney WC, Burns DM, O'Neil JA, Miller RE, Roos BA. Identification of procalcitonin in a rat medullary thyroid carcinoma cell line. *J Biol Chem* 1984;259:2870-4.
- 24: Jacobs JW, Lund PK, Potts JT Jr, Bell NH, Habener JF. Procalcitonin is a glycoprotein. *J Biol Chem* 1981;256:2803-7.
- 25: Becker KL, Nylen ES, White JC, Muller B, Snider RH Jr. Clinical review 167: Procalcitonin and the calcitonin gene family of peptides in inflammation, infection, and sepsis: a journey from calcitonin back to its precursors. *J Clin Endocrinol Metab.* 2004 Apr;89(4):1512-25. Review. No abstract available.
- 26: Linscheid P, Seboek D, Nylen ES, Langer I, Schlatter M, Becker KL, Keller U, Muller B. In vitro and in vivo calcitonin I gene expression in parenchymal cells: a novel product of human adipose tissue. *Endocrinology.* 2003 Dec;144(12):5578-84. Epub 2003 Aug 21.
- 27: Linscheid P, Seboek D, Schaer DJ, Zulewski H, Keller U, Muller B. Expression and secretion of procalcitonin and calcitonin gene-related peptide by adherent monocytes and by macrophage-activated adipocytes. *Crit Care Med.* 2004 Aug;32(8):1715-21.
- 28: Meisner M, Muller V, Khakpour Z, Toegel E, Redl H. Induction of procalcitonin and proinflammatory cytokines in an hepatic baboon endotoxin shock model. *Shock* 2003;19:187-90.
- 29: Dandona P, Nix D, Wilson MF, et al. Procalcitonin increase after endotoxin injection in normal subjects. *J Clin Endocrinol Metab* 1994;79:1605-8.
- 30: Christ-Crain M, Jaccard-Stolz D, Bingisser R, Gencay MM, Huber PR, Tamm M, Muller B. Effect of procalcitonin-guided treatment on antibiotic use and outcome in lower respiratory tract infections: cluster-randomised, single-blinded intervention trial. *Lancet.* 2004 Feb 21;363(9409):600-7.
- 31: Jensen J, Heslet L, Jensen TH, Espersen K, Steffensen P, Tvede M. Procalcitonin increase identifies critically ill patients at high risk of mortality. Submitted 26. January 2005.
- 32: Vesentini S, Bassi C, Talamini G, Cavallini G, Campedelli A, Pederzoli P. Prospective comparison of C-reactive protein level, Ranson score and contrast-enhanced computed tomography in the prediction of septic complications of acute pancreatitis. *Br J Surg* 1993;80:755-7.
- 33: Reny JL, Vuagnat A, Ract C, Benoit MO, Safar M, Fagon JY. Diagnosis and follow-up of infections in intensive care patients: value of C-reactive protein compared with other clinical and biological variables. *Crit Care Med* 2002;30:529-35.
34. Assay Characteristics, BRAHMS diagnostica, Hennigsdorf, Germany.
- 35: Meisner M, Lohs T, Huettemann E, Schmidt J, Hueller M, Reinhart K. The plasma elimination rate and urinary secretion of procalcitonin in patients with normal and impaired renal function. *Eur J Anaesthesiol.* 2001 feb;18(2):79-87.



- 1  
2  
3 36 Fleischhack G, Kambeck I, Cipic D, Hasan C, Bode U. Procalcitonin in paediatric cancer patients: its diagnostic  
4 relevance is superior to that of C-reactive protein, interleukin 6, interleukin 8, soluble interleukin 2 receptor and  
5 soluble tumour necrosis factor receptor II. *Br J Haematol*. 2000 Dec;111(4):1093-102.  
6  
7 37: von Lilienfeld-Toal M, Dietrich MP, Glasmacher A, Lehmann L, Breig P, Hahn C, Schmidt-Wolf IG, Marklein G,  
8 Schroeder S, Stuber F. Markers of bacteremia in febrile neutropenic patients with haematological malignancies:  
9 procalcitonin and IL-6 are more reliable than C-reactive protein. *Eur J Clin Microbiol Infect Dis*. 2004 Jul;23(7):  
10 539-44. Epub 2004 Jun 22.  
11  
12 38: Giamarellos-Bourboulis EJ, Grecka P, Poulakou G, Anargyrou K, Katsilambros N, Giamarellou H. Assessment  
13 of procalcitonin as a diagnostic marker of underlying infection in patients with febrile neutropenia. *Clin Infect Dis*.  
14 2001 Jun 15;32(12):1718-25. Epub 2001 May 21.  
15  
16 39: Persson L, Engervall P, Magnuson A, Vikerfors T, Soderquist B, Hansson LO, Tidefelt U. Use of inflammatory  
17 markers for early detection of bacteraemia in patients with febrile neutropenia. *Scand J Infect Dis*. 2004;36(5):365-  
18 71.  
19  
20 40: Giamarellou H, Giamarellos-Bourboulis EJ, Repoussis P, Galani L, Anagnostopoulos N, Grecka P, Lubos D,  
21 Aoun M, Athanassiou K, Bouza E, Devigili E, Krcmery V, Menichetti F, Panaretou E, Papageorgiou E, Plachouras  
22 D. Potential use of procalcitonin as a diagnostic criterion in febrile neutropenia: experience from a multicentre study.  
23 *Clin Microbiol Infect*. 2004 Jul;10(7):628-33.  
24  
25 41: Barnes C, Ignjatovic V, Newall F, Carlin J, Ng F, Hamilton S, Ashley D, Waters K, Monagle P. Change in serum  
26 procalcitonin (deltaPCT) predicts the clinical outcome of children admitted with febrile neutropenia. *Br J Haematol*.  
27 2002 Sep;118(4):1197-8. No abstract available.  
28  
29 42: Odamaki M, Kato A, Kumagai H, Hishida A. Counter-regulatory effects of procalcitonin and indoxyl sulphate on  
30 net albumin secretion by cultured rat hepatocytes. *Nephrol Dial Transplant*. 2004 Apr;19(4):797-804.  
31  
32 43: Nakae H, Inaba H, Endo S. Usefulness of procalcitonin in *Pseudomonas* burn wound sepsis model. *Tohoku J*  
33 *Exp Med*. 1999 Jul;188(3):271-3.  
34  
35 44: Holzheimer RG. Oral antibiotic prophylaxis can influence the inflammatory response in aortic aneurysm repair:  
36 results of a randomized clinical study. *J Chemother*. 2003 Apr;15(2):157-64.  
37  
38 45. Danish Law regulation 1997-03-24 nr. 228 about patient insurance  
39  
40 46. [www.patientforsikringen.dk](http://www.patientforsikringen.dk)  
41  
42  
43  
44  
45  
46  
47  
48  
49  
50  
51  
52  
53  
54  
55  
56  
57  
58  
59  
60



**Table 1: Clinical and laboratory Evaluations**

| Evaluation                                   | Day<br>(screening & baseline) |                              | Day (counting after admission<br>to ICU)<br>(follow-up) |    |    |    |     |
|----------------------------------------------|-------------------------------|------------------------------|---------------------------------------------------------|----|----|----|-----|
|                                              | 1                             | Day=Dis-<br>charge/<br>death | 28                                                      | 30 | 60 | 90 | 180 |
| Informed Consent                             | X                             |                              |                                                         |    |    |    |     |
| Entry Criteria                               | X                             |                              |                                                         |    |    |    |     |
| Demography                                   | X                             |                              |                                                         |    |    |    |     |
| APACHE II                                    | X                             | X                            |                                                         |    |    |    |     |
| Infections during this<br>hospital admission | X                             |                              |                                                         |    |    |    |     |
| Current medical conditions                   | X                             | X                            |                                                         |    |    |    |     |
| State of daily function and<br>health        | X                             |                              |                                                         | X  |    |    | X   |
| Mortality                                    |                               | (X)                          | X                                                       |    | X  | X  | X   |
| Baseline PCT                                 | X                             |                              |                                                         |    |    |    |     |
| AUC <sub>procalcitonin</sub>                 |                               | X                            |                                                         |    |    |    |     |
| Concurrent Medications <sup>a</sup>          | X                             | X                            |                                                         | X  | X  | X  | X   |
| Haematology                                  | X                             | X                            |                                                         |    |    |    |     |
| Clinical chemistry                           | X                             | X                            |                                                         |    |    |    |     |
| Adverse events                               | X <sup>a</sup>                | X                            |                                                         |    |    |    |     |
| Serious Adverse Events                       | X <sup>a</sup>                | X                            |                                                         | X  | X  | X  | X   |

a Adverse events and serious adverse events are registered daily

1  
2  
3  
4  
5  
6  
7  
8  
9  
10  
11  
12  
13  
14  
15  
16  
17  
18  
19  
20  
21  
22  
23  
24  
25  
26  
27  
28  
29  
30  
31  
32  
33  
34  
35  
36  
37  
38  
39  
40  
41  
42  
43  
44  
45  
46  
47  
48  
49  
50  
51  
52  
53  
54  
55  
56  
57  
58  
59  
60

For peer review only

## 9. APPENDICES

### Appendix 1

#### Declaration of Helsinki

### WORLD MEDICAL ASSOCIATION DECLARATION OF HELSINKI

#### Ethical Principles for Medical Research Involving Human Subjects

Adopted by the 18th WMA General Assembly

Helsinki, Finland, June 1964

and amended by the

29th WMA General Assembly, Tokyo, Japan, October 1975

35th WMA General Assembly, Venice, Italy, October 1983

41st WMA General Assembly, Hong Kong, September 1989

48th WMA General Assembly, Somerset West, Republic of South Africa, October 1996

and the

52nd WMA General Assembly, Edinburgh, Scotland, October 2000

#### A. INTRODUCTION

1. The World Medical Association has developed the Declaration of Helsinki as a statement of ethical principles to provide guidance to physicians and other participants in medical research involving human subjects. Medical research involving human subjects includes research on identifiable human material or identifiable data.
2. It is the duty of the physician to promote and safeguard the health of the people. The physician's knowledge and conscience are dedicated to the fulfillment of this duty.
3. The Declaration of Geneva of the World Medical Association binds the physician with the words, "The health of my patient will be my first consideration," and the International Code of Medical Ethics declares that, "A physician shall act only in the patient's interest when providing medical care which might have the effect of weakening the physical and mental condition of the patient."
4. Medical progress is based on research which ultimately must rest in part on experimentation involving human subjects.
5. In medical research on human subjects, considerations related to the well-being of the human subject should take precedence over the interests of science and society.
6. The primary purpose of medical research involving human subjects is to improve prophylactic, diagnostic and therapeutic procedures and the understanding of the aetiology and pathogenesis of disease. Even the best proven prophylactic, diagnostic, and therapeutic methods must continuously be challenged through research for their effectiveness, efficiency, accessibility and quality.
7. In current medical practice and in medical research, most prophylactic, diagnostic and therapeutic procedures involve risks and burdens.
8. Medical research is subject to ethical standards that promote respect for all human beings and protect their health and rights. Some research populations are vulnerable and need special protection. The particular needs of the economically and medically disadvantaged must be recognized. Special attention is also required for those who cannot give or refuse consent for themselves, for those who may be subject to giving consent under duress, for those who will not benefit personally from the research and for those for whom the research is combined with care.
9. Research Investigators should be aware of the ethical, legal and regulatory requirements for research on human subjects in their own countries as well as applicable international requirements. No national ethical, legal or regulatory requirement should be allowed to reduce or eliminate any of the protections for human subjects set forth in this Declaration.

**B. BASIC PRINCIPLES FOR ALL MEDICAL RESEARCH**

10. It is the duty of the physician in medical research to protect the life, health, privacy, and dignity of the human subject.
11. Medical research involving human subjects must conform to generally accepted scientific principles, be based on a thorough knowledge of the scientific literature, other relevant sources of information, and on adequate laboratory and, where appropriate, animal experimentation.
12. Appropriate caution must be exercised in the conduct of research which may affect the environment, and the welfare of animals used for research must be respected.
13. The design and performance of each experimental procedure involving human subjects should be clearly formulated in an experimental protocol. This protocol should be submitted for consideration, comment, guidance, and where appropriate, approval to a specially appointed ethical review committee, which must be independent of the investigator, the sponsor or any other kind of undue influence. This independent committee should be in conformity with the laws and regulations of the country in which the research experiment is performed. The committee has the right to monitor ongoing trials. The researcher has the obligation to provide monitoring information to the committee, especially any serious adverse events. The researcher should also submit to the committee, for review, information regarding funding, sponsors, institutional affiliations, other potential conflicts of interest and incentives for subjects.
14. The research protocol should always contain a statement of the ethical considerations involved and should indicate that there is compliance with the principles enunciated in this Declaration.
15. Medical research involving human subjects should be conducted only by scientifically qualified persons and under the supervision of a clinically competent medical person. The responsibility for the human subject must always rest with a medically qualified person and never rest on the subject of the research, even though the subject has given consent.
16. Every medical research project involving human subjects should be preceded by careful assessment of predictable risks and burdens in comparison with foreseeable benefits to the subject or to others. This does not preclude the participation of healthy volunteers in medical research. The design of all studies should be publicly available.
17. Physicians should abstain from engaging in research projects involving human subjects unless they are confident that the risks involved have been adequately assessed and can be satisfactorily managed. Physicians should cease any investigation if the risks are found to outweigh the potential benefits or if there is conclusive proof of positive and beneficial results.
18. Medical research involving human subjects should only be conducted if the importance of the objective outweighs the inherent risks and burdens to the subject. This is especially important when the human subjects are healthy volunteers.
19. Medical research is only justified if there is a reasonable likelihood that the populations in which the research is carried out stand to benefit from the results of the research.
20. The subjects must be volunteers and informed participants in the research project.
21. The right of research subjects to safeguard their integrity must always be respected. Every precaution should be taken to respect the privacy of the subject, the confidentiality of the patient's information and to minimize the impact of the study on the subject's physical and mental integrity and on the personality of the subject.
22. In any research on human beings, each potential subject must be adequately informed of the aims, methods, sources of funding, any possible conflicts of interest, institutional affiliations of the researcher, the anticipated benefits and potential risks of the study and the discomfort it may entail. The subject should be informed of the right to abstain from participation in the study or to withdraw consent to participate at any time without reprisal. After ensuring that the subject has understood the information, the physician should then obtain the subject's freely-given informed consent, preferably in writing. If the consent cannot be obtained in writing, the non-written consent must be formally documented and witnessed.
23. When obtaining informed consent for the research project the physician should be particularly cautious if the subject is in a dependent relationship with the physician or may consent under duress. In that case the informed consent should be obtained by a well-informed physician who is not engaged in the investigation and who is completely independent of this relationship.
24. For a research subject who is legally incompetent, physically or mentally incapable of giving consent or is a legally incompetent minor, the investigator must obtain

1  
2  
3 informed consent from the legally authorized  
4 representative in accordance with applicable law. These  
5 groups should not be included in research unless the  
6 research is necessary to promote the health of the  
7 population represented and this research cannot instead  
8 be performed on legally competent persons.

- 9  
10  
11 25. When a subject deemed legally incompetent, such as a  
12 minor child, is able to give assent to decisions about  
13 participation in research, the investigator must obtain that  
14 assent in addition to the consent of the legally authorized  
15 representative.
- 16  
17 26. Research on individuals from whom it is not possible to  
18 obtain consent, including proxy or advance consent,  
19 should be done only if the physical/mental condition that  
20 prevents obtaining informed consent is a necessary  
21 characteristic of the research population. The specific  
22 reasons for involving research subjects with a condition  
23 that renders them unable to give informed consent should  
24 be stated in the experimental protocol for consideration  
25 and approval of the review committee. The protocol  
26 should state that consent to remain in the research  
27 should be obtained as soon as possible from the  
28 individual or a legally authorized surrogate.
- 29  
30  
31 27. Both authors and publishers have ethical obligations. In  
32 publication of the results of research, the investigators are  
33 obliged to preserve the accuracy of the results. Negative  
34 as well as positive results should be published or  
35 otherwise publicly available. Sources of funding,  
36 institutional affiliations and any possible conflicts of  
37 interest should be declared in the publication. Reports of  
38 experimentation not in accordance with the principles laid  
39 down in this Declaration should not be accepted for  
40 publication.  
41  
42  
43  
44  
45  
46  
47  
48  
49  
50  
51  
52  
53  
54  
55  
56  
57  
58  
59  
60

### C. ADDITIONAL PRINCIPLES FOR MEDICAL RESEARCH COMBINED WITH MEDICAL CARE

28. The physician may combine medical research with medical care, only to the extent that the research is justified by its potential prophylactic, diagnostic or therapeutic value. When medical research is combined with medical care, additional standards apply to protect the patients who are research subjects.
29. The benefits, risks, burdens and effectiveness of a new method should be tested against those of the best current prophylactic, diagnostic, and therapeutic methods. This does not exclude the use of placebo, or no treatment, in studies where no proven prophylactic, diagnostic or therapeutic method exists.
30. At the conclusion of the study, every patient entered into the study should be assured of access to the best proven prophylactic, diagnostic and therapeutic methods identified by the study.
31. The physician should fully inform the patient which aspects of the care are related to the research. The refusal of a patient to participate in a study must never interfere with the patient-physician relationship.
32. In the treatment of a patient, where proven prophylactic, diagnostic and therapeutic methods do not exist or have been ineffective, the physician, with informed consent from the patient, must be free to use unproven or new prophylactic, diagnostic and therapeutic measures, if in the physician's judgement it offers hope of saving life, re-establishing health or alleviating suffering. Where possible, these measures should be made the object of research, designed to evaluate their safety and efficacy. In all cases, new information should be recorded and, where appropriate, published. The other relevant guidelines of this Declaration should be followed.

## Appendix 2: Abbreviations

|              |                                                   |
|--------------|---------------------------------------------------|
| AE           | Adverse Event (AE)                                |
| ALAT         | Alanine Aminotransferase (SGOT)                   |
| APACHE II    | Acute Physiology And Chronic Health Evaluation II |
| ASAT         | Aspartate Aminotransferase (SGPT)                 |
| CDC          | Centers for Disease Control                       |
| CRF          | Case Report Form                                  |
| DDD          | Defined Day Doses                                 |
| DIC          | Disseminated Intravascular Coagulation            |
| DSMB         | Data Safety Monitoring Board                      |
| ICU          | Intensive Care Unit                               |
| IEC          | Independent Ethics Committee                      |
| IL-6         | Interleukin 6                                     |
| MODS         | Multi Organ Dysfunction Syndrome                  |
| PASS         | Procalcitonin and Survival Study                  |
| PCT          | Procalcitonin                                     |
| SAE          | Serious Adverse Event                             |
| TNF $\alpha$ | Tumor Necrosis Factor $\alpha$                    |
| WBC          | White Blood cell Count                            |

**Appendix 3: Table of conversion factors for laboratory units**

| TEST                           | CONVENTIONAL         |        | SI                               |        |
|--------------------------------|----------------------|--------|----------------------------------|--------|
|                                | Unit                 | Factor | Unit                             | Factor |
| Haemoglobin                    | g/dl                 | 0,6206 | mmol/l                           | 1,61   |
| Platelets                      | Thou/mm <sup>3</sup> | 0,001  | <sup>a</sup> x10 <sup>9</sup> /l | 1000   |
| Hyponatraemia<br>(↓ Sodium)    | mEq/l                | 1,0    | mmol/l                           | 1,0    |
| Hypernatraemia<br>(↑ Sodium)   | mEq/l                | 1,0    | mmol/l                           | 1,0    |
| Hypokalaemia<br>(↓ Potassium)  | mEq/l                | 1,0    | mmol/l                           | 1,0    |
| Hyperkalaemia<br>(↑ Potassium) | mEq/l                | 1,0    | mmol/l                           | 1,0    |
| Hypoglycaemia<br>(↓ Glucose)   | mg/dl                | 0,0555 | mmol/l                           | 18,0   |
| Hyperglycaemia<br>(↑ Glucose)  | mg/dl                | 0,0555 | mmol/l                           | 18,0   |
| Hypocalcaemia<br>(↓ Calcium)   | mg/dl                | 0,2495 | mmol/l                           | 4,0    |
| Hypercalcaemia<br>(↑ Calcium)  | mg/dl                | 0,2495 | mmol/l                           | 4,0    |

<sup>a</sup> No SI unit

For example: Haemoglobin 9,5 g/dl - multiply by factor 0,6206 → 5,9 mmol/l

## Appendix 4: Table with the used antibacterial and antifungal drugs used in the 6 participating Intensive Care Units.

| Generic name                | Comercial name (s)                                                            |
|-----------------------------|-------------------------------------------------------------------------------|
| Benzyl-Penicillin           | Penicillin"Leo", Penicillin"Rosco" Benzyl-Penicillin"Panpharma"               |
| Phenoxymethyl-Penicillin    | Calcipen ®, Pancillin ®, Primcillin ®, Rocilin ®, Vepicombin ®"DAK"           |
| Dicloxacillin               | Dicillin ®, Diclocil ®                                                        |
| Flucloxacillin              | Heracillin                                                                    |
| Amoxicillin                 | Amoxicillin"NM", Flemoxin Solutab ®, Imacillin ®, Imadrax ®,                  |
| Amoxicillin+Clavulanic Acid | Bioclavid, Bioclavid Forte, Spektramox ®                                      |
| Ampicillin                  | Ampicillin"Vepidan", Doktacillin, Pentrexyl ®                                 |
| Piperacillin                | Ivacin ®, Pipril                                                              |
| Piperacillin+Tazobactam     | Tazocin ®                                                                     |
| Pivampicillin               | Pondocillin ®                                                                 |
| Pivmecillinam/ Mecillinam   | Selexid ®                                                                     |
| Cefalexin                   | Keflex ®                                                                      |
| Cefalotin                   | Keflin ®                                                                      |
| Cefepim                     | Maxipime ®                                                                    |
| Cefotaxim                   | Claforan ®                                                                    |
| Ceftazidim                  | Fortum ®                                                                      |
| Ceftriaxon                  | Rocephalin ®                                                                  |
| Cefuroxim                   | Zinacef, Cefuroxim Stragen, Zinnat ®                                          |
| Aztreonam                   | Azactam ®                                                                     |
| Meropenem                   | Meronem ®                                                                     |
| Imipenem+cilastatin         | Tienam ®                                                                      |
| Azithromycin                | Zitromax ®                                                                    |
| Clarithromycin              | Klacid ®, Klacid ® Uno, Klaricid, Zeclar                                      |
| Erythromycin                | Abboticin ®, Abboticin ® Novum, Erycin ®, Escumycin, Hexabotin ®              |
| Roxithromycin               | Surlid ®, Forimycin ®, Roximstad, Roxithromycin"Copyfarm", Roxithromycin"UNP" |
| Doxycyclin                  | Vibradox ®                                                                    |
| Lymecyclin                  | Tetralysal ®                                                                  |
| Oxytetracyclin              | Oxytetral ®                                                                   |
| Tetracyclin                 | Tetracyclin"AL", Tetracyclin"DAK", Tetracyclin"SAD"                           |



|                              |                                                                                                                                                                                             |
|------------------------------|---------------------------------------------------------------------------------------------------------------------------------------------------------------------------------------------|
| Gentamicin                   | Garamycin ®, Gentacoll ®, Hexamycin, Septopal, Septopal Mini                                                                                                                                |
| Netilmicin                   | Netilyn                                                                                                                                                                                     |
| Tobramycin                   | Nebcina ®, Tobi ®                                                                                                                                                                           |
| Moxifloxacin                 | Avelox                                                                                                                                                                                      |
| Ciprofloxacin                | Ciproxin ®, Cifin, Ciprofloxacin“1A Farma”, Ciprofloxacin“2K Pharma”, Ciprofloxacin“Alpharma”, Ciprofloxacin“Biochemie”, Ciprofloxacin“Gea”, Ciprofloxacin“Ratiopharm”, Sancipro, Sibunar ® |
| Ofloxacin                    | Tarivid ®                                                                                                                                                                                   |
| Norfloxacin                  | Zoroxin ®                                                                                                                                                                                   |
| Methenamin                   | Haiprex                                                                                                                                                                                     |
| Nitrofurantoin               | Nitrofurantoin“DAK”, Nitrofurantoin“SAD”                                                                                                                                                    |
| Sulfamethizol                | Lucosil ®, Sulfametizol“SAD”, Sulfametizol“Ophtha”                                                                                                                                          |
| Trimethoprim                 | Monotrim ®, Trimethoprim“1A Farma”, Trimopan                                                                                                                                                |
| Sulfamethoxazol+Trimethoprim | Sulfamethoxazol+Trimethoprim“SAD”, Sulfotrim ®                                                                                                                                              |
| Clindamycin                  | Dalacin ®                                                                                                                                                                                   |
| Colistin                     | Colimycin                                                                                                                                                                                   |
| Teicoplanin                  | Targocid ®                                                                                                                                                                                  |
| Vancomycin                   | Vancocin, Vancomycin“Abbott”, Vancomycin“Alpharma”                                                                                                                                          |
| Fusidinsyre                  | Fucidin ®                                                                                                                                                                                   |
| Linezolid                    | Zyvoxid ®                                                                                                                                                                                   |
| Metronidazol                 | Flagyl ®, Metronidazol“Alpharma”, Metronidazol“DAK”, Metronidazol“SAD”                                                                                                                      |
| Amphotericin B               | Abelcet, AmBisome, Fungizone                                                                                                                                                                |
| Caspofungin                  | Cancidas ®                                                                                                                                                                                  |
| Fluconazol                   | Conasol, Diflucan ®, Fluconazol“Alpharma”, Fluconazol“Copyfarm”, Fluconazol“Nycomed”, Fluconazol“Ratiopharm”, Fluconazol“Stada”, Fungal ®, Fungustatin                                      |
| Flucytosin                   | Ancotil                                                                                                                                                                                     |
| Ketoconazol                  | Nizoral ®                                                                                                                                                                                   |
| Voriconazol                  | Vfend                                                                                                                                                                                       |
| Ethambutol                   | Myambutol ®                                                                                                                                                                                 |
| Isoniacid                    | Isoniacid“OBA”                                                                                                                                                                              |
| Pyrazinamid                  | Pyrazinamid“Medic”, Pyrazinamid“SAD”                                                                                                                                                        |
| Rifabutin                    | Rifabutin“Pharmacia”                                                                                                                                                                        |
| Rifampicin                   | Rimactan ®                                                                                                                                                                                  |

CONSORT 2010 checklist of information to include when reporting a randomised trial\*

| Section/Topic             | Item No | Checklist item                                                                                                                            | Reported on page No     |
|---------------------------|---------|-------------------------------------------------------------------------------------------------------------------------------------------|-------------------------|
| <b>Title and abstract</b> |         |                                                                                                                                           |                         |
|                           | 1a      | Identification as a randomised trial in the title                                                                                         | 1                       |
|                           | 1b      | Structured summary of trial design, methods, results, and conclusions (for specific guidance see CONSORT for abstracts <sup>21 31</sup> ) | 3                       |
| <b>Introduction</b>       |         |                                                                                                                                           |                         |
| Background and objectives | 2a      | Scientific background and explanation of rationale                                                                                        | 4                       |
|                           | 2b      | Specific objectives or hypotheses                                                                                                         | 4                       |
| <b>Methods</b>            |         |                                                                                                                                           |                         |
| Trial design              | 3a      | Description of trial design (such as parallel, factorial) including allocation ratio                                                      | 5                       |
|                           | 3b      | Important changes to methods after trial commencement (such as eligibility criteria), with reasons                                        | -                       |
| Participants              | 4a      | Eligibility criteria for participants                                                                                                     | 5                       |
|                           | 4b      | Settings and locations where the data were collected                                                                                      | 1,5,15                  |
| Interventions             | 5       | The interventions for each group with sufficient details to allow replication, including how and when they were actually administered     | 6 + fig. 2 + Diagram D1 |
| Outcomes                  | 6a      | Completely defined pre-specified primary and secondary outcome measures, including how and when they were assessed                        | 6-7                     |
|                           | 6b      | Any changes to trial outcomes after the trial commenced, with reasons                                                                     | -                       |
| Sample size               | 7a      | How sample size was determined                                                                                                            | 7-8                     |
|                           | 7b      | When applicable, explanation of any interim analyses and stopping guidelines                                                              | -                       |
| Randomisation:            |         |                                                                                                                                           |                         |
| Sequence generation       | 8a      | Method used to generate the random allocation sequence                                                                                    | 5                       |
|                           | 8b      | Type of randomisation; details of any restriction (such as blocking and block size)                                                       | 5                       |

| Section/Topic                                        | Item No | Checklist item                                                                                                                                                                              | Reported on page No        |
|------------------------------------------------------|---------|---------------------------------------------------------------------------------------------------------------------------------------------------------------------------------------------|----------------------------|
| Allocation concealment mechanism                     | 9       | Mechanism used to implement the random allocation sequence (such as sequentially numbered containers), describing any steps taken to conceal the sequence until interventions were assigned | 5                          |
| Implementation                                       | 10      | Who generated the random allocation sequence, who enrolled participants, and who assigned participants to interventions                                                                     | 6                          |
| Blinding                                             | 11a     | If done, who was blinded after assignment to interventions (for example, participants, care providers, those assessing outcomes) and how                                                    | 6                          |
|                                                      | 11b     | If relevant, description of the similarity of interventions                                                                                                                                 | 6                          |
| Statistical methods                                  | 12a     | Statistical methods used to compare groups for primary and secondary outcomes                                                                                                               | 6-7                        |
|                                                      | 12b     | Methods for additional analyses, such as subgroup analyses and adjusted analyses                                                                                                            | 6-7                        |
| <b>Results</b>                                       |         |                                                                                                                                                                                             |                            |
| Participant flow (a diagram is strongly recommended) | 13a     | For each group, the numbers of participants who were randomly assigned, received intended treatment, and were analysed for the primary outcome                                              | Figure 1 (CONSORT diagram) |
|                                                      | 13b     | For each group, losses and exclusions after randomisation, together with reasons                                                                                                            | Figure 1 (CONSORT diagram) |
| Recruitment                                          | 14a     | Dates defining the periods of recruitment and follow-up                                                                                                                                     | 8                          |
|                                                      | 14b     | Why the trial ended or was stopped                                                                                                                                                          | 8                          |
| Baseline data                                        | 15      | A table showing baseline demographic and clinical characteristics for each group                                                                                                            | Table 1                    |
| Numbers analysed                                     | 16      | For each group, number of participants (denominator) included in each analysis and whether the analysis was by original assigned groups                                                     | 8-9, table 3 +table 4      |
| Outcomes and estimation                              | 17a     | For each primary and secondary outcome, results for each group, and the estimated effect                                                                                                    |                            |

| Section/Topic            | Item No | Checklist item                                                                                                                            | Reported on page No             |
|--------------------------|---------|-------------------------------------------------------------------------------------------------------------------------------------------|---------------------------------|
|                          |         | size and its precision (such as 95% confidence interval)                                                                                  | 9-10 + table 2, 3, 4 + fig. 3+4 |
|                          | 17b     | For binary outcomes, presentation of both absolute and relative effect sizes is recommended                                               | Abstract + p.                   |
| Ancillary analyses       | 18      | Results of any other analyses performed, including subgroup analyses and adjusted analyses, distinguishing pre-specified from exploratory | Table 3, fig. 3+4, p 10.        |
| Harms                    | 19      | All important harms or unintended effects in each group (for specific guidance see CONSORT for harms <sup>28</sup> )                      | Table 3+4, p. 10-11, fig. 3+4   |
| <b>Discussion</b>        |         |                                                                                                                                           |                                 |
| Limitations              | 20      | Trial limitations, addressing sources of potential bias, imprecision, and, if relevant, multiplicity of analyses                          | 13                              |
| Generalisability         | 21      | Generalisability (external validity, applicability) of the trial findings                                                                 | 13                              |
| Interpretation           | 22      | Interpretation consistent with results, balancing benefits and harms, and considering other relevant evidence                             | 10-14                           |
| <b>Other information</b> |         |                                                                                                                                           |                                 |
| Registration             | 23      | Registration number and name of trial registry                                                                                            | 4-5                             |
| Protocol                 | 24      | Where the full trial protocol can be accessed, if available                                                                               | 5                               |
| Funding                  | 25      | Sources of funding and other support (such as supply of drugs), role of funders                                                           | 16                              |

\*We strongly recommend reading this statement in conjunction with the CONSORT 2010 Explanation and Elaboration<sup>13</sup> for important clarifications on all the items. If relevant, we also recommend reading CONSORT extensions for cluster randomised trials,<sup>11</sup> non-inferiority and equivalence trials,<sup>12</sup> non-pharmacological treatments,<sup>32</sup> herbal interventions,<sup>33</sup> and pragmatic trials.<sup>34</sup> Additional extensions are forthcoming: for those and for up to date references relevant to this checklist, see [www.consort-statement.org](http://www.consort-statement.org).

1  
2  
3  
4  
5  
6  
7 Kidney failure related to broad-spectrum antibiotics in critically ill  
8  
9 patients: secondary end point results from a 1200 patient randomized trial  
10

11 Corresponding author Jens-Ulrik Jensen, Copenhagen HIV Programme, The Panum Institute,  
12 Faculty of Health Sciences, University of Copenhagen, Blegdamsvej 3B, DK-2200 Copenhagen N,  
13 [juj@cphiv.dk](mailto:juj@cphiv.dk)  
14

15  
16  
17 Jens Ulrik Jensen *medical doctor*<sup>1,2</sup>, Lars Hein *anaesthetist*<sup>3,4</sup>, Bettina Lundgren *centre director*,  
18 *hospital diagnostic centre*<sup>2,5</sup>, Morten Heiberg Bestle *anaesthetist*<sup>4</sup>, Thomas Mohr *anaesthetist*<sup>6</sup>,  
19 Mads Holmen Andersen *anaesthetist*<sup>7</sup>, Klaus Julius Thornberg *anaesthetist*<sup>6</sup>, Jesper Løken  
20 *anaesthetist*<sup>8</sup>, Morten Steensen *anaesthetist*<sup>8</sup>, Zoe Fox *biostatistician*<sup>1,9</sup>, Hamid Tousi *anaesthetist*<sup>10</sup>,  
21 Peter Søe-Jensen *anaesthetist*<sup>10</sup>, Anne Øberg Lauritsen *anaesthetist*<sup>3</sup>, Ditte Gry Strange  
22 *anaesthetist*<sup>3</sup>, Nanna Reiter *anaesthetist*<sup>11</sup>, Katrin Thormar *anaesthetist*<sup>6</sup>, Paul Christian Fjeldborg  
23 *anaesthetist*<sup>7</sup>, Kim Michael Larsen *anaesthetist*<sup>12</sup>, Niels-Erik Drenck *anaesthetist*<sup>11</sup> Maria Egede  
24 Johansen *junior research associate*<sup>1</sup>, Lene Ryom *junior research executive*<sup>1</sup>, Christian Østergaard  
25 *senior research executive*<sup>2,13</sup>, Jesper Kjær *database manager*<sup>1</sup>, Jesper Grarup *administrative leader*  
26 <sup>1</sup>, Jens D. Lundgren *professor of infectious diseases*<sup>1,14</sup> of the The Procalcitonin And Survival  
27 Study (PASS) Group\*.  
28

29  
30  
31  
32  
33  
34  
35  
36  
37  
38 <sup>1</sup>Copenhagen HIV Programme at the University of Copenhagen; <sup>2</sup>Department of Clinical  
39 Microbiology at Copenhagen University Hospital Hvidovre; <sup>3</sup>Department of Anesthesia and  
40 Intensive Care at Copenhagen University Hospital Glostrup; <sup>4</sup>Department of Anesthesia and  
41 Intensive Care at Copenhagen University Hospital Hillerød; <sup>5</sup>Diagnostic Centre at Copenhagen  
42 University Hospital Rigshospitalet; <sup>6</sup>Department of Anesthesia and Intensive Care at Copenhagen  
43 University Hospital Gentofte; <sup>7</sup>Department of Anesthesia and Intensive Care at Aarhus University  
44 Hospital in Skejby; <sup>8</sup>Department of Anesthesia and Intensive Care at Copenhagen University  
45 Hospital Hvidovre; <sup>9</sup>Royal Free Hospital School of Medicine in London; <sup>10</sup>Department of  
46  
47  
48  
49  
50  
51  
52  
53  
54  
55  
56  
57  
58  
59  
60

1  
2  
3  
4  
5  
6  
7 Anesthesia and Intensive Care at Copenhagen University Hospital Herlev; <sup>11</sup>Department of  
8 Anesthesia and Intensive Care at Copenhagen University Hospital in Roskilde; <sup>12</sup>Department of  
9 Anesthesia and Intensive Care at Aarhus University Hospital in Aarhus; <sup>13</sup>Department of Clinical  
10 Microbiology at Copenhagen University Hospital Herlev; <sup>14</sup>Department of Infectious Diseases at  
11 Copenhagen University Hospital Rigshospitalet. All except<sup>9</sup> are from Denmark. <sup>9</sup> is from England.  
12  
13  
14  
15

16 \*Participating investigators are listed in the appendix.  
17

18 Running Title: Broad-Spectrum Antibiotics and Renal Failure in Critically Ill Patients  
19

20 Keywords: Antibiotics – Renal Failure – Sepsis – Intensive Care  
21

22  
23 **Copyright:** The Corresponding Author has the right to grant on behalf of all authors and does grant  
24 on behalf of all authors, an exclusive licence (or non exclusive for government employees) on a  
25 worldwide basis to the BMJ Publishing Group Ltd and its licensees , to permit this article (if  
26  
27 accepted) to be published in BMJ editions and any other BMJPG products and to exploit all  
28  
29 subsidiary rights, as set out in our licence.  
30  
31  
32  
33  
34  
35  
36  
37  
38  
39  
40  
41  
42  
43  
44  
45  
46  
47  
48  
49  
50  
51  
52  
53  
54  
55  
56  
57  
58  
59  
60

## Abstract

**Objectives:** To ~~explore~~ **determine** whether a strategy of more intensive antibiotic therapy with antibiotics not normally considered to be nephrotoxic leads to adverse renal outcomes in intensive care patients.

**Design:** Secondary analysis from a randomized antibiotic strategy trial (the *PASS study*). The randomized arms were conserved from the primary trial for the main analysis.

**Setting:** Nine mixed surgical/medical intensive care units across Denmark.

**Participants:** 1200 adult intensive care patients, 18 years or older, who were expected to stay more than 24 hours. Exclusion criteria were known ~~extreme~~ bilirubin >40 mg/dL or triglycerides >1000 mg/dL, patients at an increased risk from blood sampling, pregnant or breast feeding and persons ~~held by force~~ (psychiatric patients).

**Interventions:** Patients were randomized either to guideline-based therapy ('standard-exposure'-arm), or to guideline-based therapy supplemented with antibiotic escalation whenever procalcitonin increased ('high-exposure'-arm), according to daily measurements of this biomarker.

**Main outcome measures:** The primary endpoint was estimated GFR <60 ml/min/1.73 m<sup>2</sup>.

Secondary endpoints were a) delta eGFR after starting/stopping a drug, b) RIFLE criterion Risk "R", Renal failure, as defined by 1) RIFLE criteria, 2) estimated Glomerular Filtration Rate (eGFR) increase after administration of a certain drug, 3) eGFR <60 ml/min/1.73 m<sup>2</sup> ('ever' or 'total time') until day 28. Analysis was by intention to treat.

**Results:** 28-day mortality was 31.8% and comparable (Jensen et al, CCM 2011). A total of 3672/7634 (48.1%) study days during follow-up in the "high-exposure" vs. 3016/6949 (43.4%) in the 'standard-exposure'-arm were spent with eGFR <60 ml/min/1.73 m<sup>2</sup>, p<0.001. In a multiple effects model, piperacillin/tazobactam was identified as causing the lowest rate of renal recovery of all antibiotics: 1.0 ml/min/1.73 m<sup>2</sup> per 24h while exposed to this drug [95% CI: 0.7 – 1.3 ml/min/1.73 m<sup>2</sup>/24h] vs. meropenem: 2.9 ml/min/1.73 m<sup>2</sup>/24h [2.5 – 3.3 ml/min/1.73 m<sup>2</sup>/24h];

1  
2  
3  
4  
5  
6  
7 after discontinuing piperacillin/tazobactam, the renal recovery rate increased: 2.7 ml/min/1.73 m<sup>2</sup>  
8 /24h [2.3 – 3.1 ml/min/1.73 m<sup>2</sup> /24h]. eGFR<60 ml/min/1.73m<sup>2</sup> in the two groups at entry and at  
9 last day of follow-up was 57% vs. 55% and 41% vs. 39%, resp.  
10

11  
12 **Conclusions:** Piperacillin/tazobactam was identified as a cause of delayed renal recovery in  
13 critically ill patients. This nephrotoxicity was not observed when using other beta-lactam  
14 antibiotics. It remains unclear, whether such a nephrotoxic effect is also present in non-critically ill  
15 patients.  
16  
17  
18  
19

20 **Trial registration** ClinicalTrials.gov identifier NCT00271752.  
21  
22

## 23 Introduction

24 Frequent complications to sepsis are organ failure, especially respiratory failure and renal failure<sup>1-3</sup>.

25 Critically ill patients are more vulnerable to organ-related drug toxicities than less severely ill  
26 patients<sup>4</sup>. Randomized trials assessing safety of broad-spectrum antibiotics in intensive care settings  
27 are generally scarce, do not have sufficient statistical power for assessing organ failure endpoints,  
28 and do often not include defined kidney organ failure endpoints<sup>5-7</sup>. Data on renal failure endpoints  
29 are also sparse in the published trials from other patient populations, and since the absolute risk of  
30 renal failure is low for these patients, analyses may likely have been underpowered<sup>8-12</sup>.

31 To our knowledge, randomized trials comparing ‘high exposure’ vs. ‘standard exposure to  
32 antibiotics’ and specifically addressing whether these interventions affect the occurrence and  
33 duration of kidney failure have not been done before in intensive care settings.  
34  
35  
36

37 In this secondary analysis from a randomized trial, the PASS study<sup>13</sup>, we aimed to

38 explore~~investigate~~ whether a strategy of more intensive antibiotic therapy leads to adverse renal  
39 outcomes within 28 days after recruitment.  
40  
41

42 In our study population (and often in severely infected ICU patients), a bacterial hit has resulted in  
43 acute onset renal failure, and this bacterial hit (and related organ failure) is often the reason for ICU  
44  
45  
46  
47  
48  
49  
50  
51  
52  
53  
54  
55  
56  
57  
58  
59  
60



1  
2  
3  
4  
5  
6  
7 admittance. In such situations, with the correct treatment of the underlying infection, we expect  
8 renal function to recover. "Lack of recovery" is a non-desirable situation, which may be very  
9 serious for the patient. We wanted to explore this, and realizing, RIFLE/AKIN could not capture  
10 this, we have used eGFR<60 ml/min/1.73 m<sup>2</sup> as the primary endpoint and examined this from  
11 different angles (eGFR<60 ml/min/1.73 m<sup>2</sup> at day 7, days with ml/min/1.73 m<sup>2</sup> . The multiple  
12 effects model was built to capture actual estimates of renal function improvement using different  
13 antibiotics and adjusting for other known or suspected causes of renal dysfunction.  
14  
15  
16  
17  
18  
19

20 Secondly, if renal failure was observed from the 'high exposure' approach, to identify one or  
21 several of the antibiotics used in this trial as the cause of such a renal failure.  
22  
23

## 24 **Methods**

### 25 **Trial design and participants**

26 *PASS* is a multicentre randomized controlled trial in Denmark 2006-9 in 1200 adult critically ill  
27 patients, expected to stay in one of the nine participating mixed medical/surgical intensive care  
28 units  $\geq 24$  hours; the CONSORT trial diagram is displayed in supplementary figure 1. Patients were  
29 randomized 1:1 either to treatment according to international guidelines: 'standard exposure arm',  
30 or to same guidelines but supplemented with daily drug-escalation initiated upon procalcitonin  
31 increases ('high exposure'-arm); 28-day mortality was 31.8% and comparable between the two  
32 groups, as reported<sup>13</sup>.  
33  
34  
35  
36  
37  
38  
39

40 To be eligible, patients had to be  $\geq 18$  years, enrolled within 24 hours of admission to the intensive  
41 care unit and have an expected intensive care-admission length of  $\geq 24$  hours. Patients with known  
42 bilirubin  $>40$  mg/dL and triglycerides  $>1000$  mg/dL (not suspensive) were not eligible (interference  
43 with procalcitonin measurements), as were patients who were judged to be at an increased risk from  
44 blood sampling. The inclusion criteria were broad since infection is frequent and often causes  
45 complications in the patient group and to increase the external validity of the results. The person or  
46 next of kin gave informed consent. The study protocol was approved by the regional ethics  
47  
48  
49  
50  
51  
52  
53  
54  
55  
56  
57  
58  
59  
60

1  
2  
3  
4  
5  
6  
7 committees in Denmark (H-KF-272-753) and adheres to the Helsinki declaration, revised in Seoul  
8  
9 2008.

10 In the present analyses we explored presence and duration of renal failure as well as change in renal  
11  
12 function during the observed time. Endpoints are defined in *statistical analysis* below. Patients  
13  
14 were followed until day 28. The primary trial protocol and the analysis plan is available in the  
15  
16 online supplement. Analysis was by intention to treat: NCT00271752.  
17  
18

### 19 *Randomization and masking*

20 Randomization was performed 1:1 using a computerized algorithm created by the database manager  
21  
22 (JK) with concealed block-size, pre-stratified for site of recruitment, initial APACHE-II and age  
23  
24 (entered in an encrypted screening form in a password protected website); investigators were  
25  
26 masked to assignment before, but not after, randomization. All investigators were trained by the  
27  
28 coordinating centre and had to register in an investigator-database. Investigators, treating physicians  
29  
30 and the coordinator were unaware of outcomes during the study, as were they of all procalcitonin  
31  
32 measurements in the 'standard exposure' (control)-group.  
33  
34  
35

### 36 *Antibiotic therapy in the two arms*

37 The investigators enrolled participants and assigned the 'high exposure group' participants to the  
38  
39 intervention. In the 'standard exposure' group, the antimicrobial treatment was guided according to  
40  
41 current clinical guidelines<sup>14</sup>, based on clinical assessment, microbiology and radiology among other  
42  
43 parameters, as described elsewhere<sup>13</sup>

44 In the 'high exposure' group, the use of antimicrobial interventions was guided by the same clinical  
45  
46 guidelines as in the 'standard exposure' group to ascertain the best standard of care therapy for all  
47  
48 patients, and additionally antimicrobial interventions were initiated whenever procalcitonin levels  
49  
50 were not decreasing at a pre-defined pace ([supplementary figure 2](#)) and diagram D1 in the online  
51  
52 supplement where a site-adjusted local guideline is displayed.  
53  
54  
55  
56  
57  
58  
59  
60

### Measurements, data collection and follow-up

Blood samples for biomarker measurement were made daily in the intensive care unit, beginning immediately after randomization. The assay used was the Kryptor®-PCT. Organ failure and antibiotic exposure was followed up for until 28 days or death, as described<sup>13</sup>. Mortality was followed via the National Patient Register in which all deaths in Denmark are registered within 14 days. Good Clinical Practice guidelines were applied. The regional ethics board approved the protocol (H-KF-01-272-753).

### Statistical analysis

The primary endpoint was 'estimated GFR<60 ml/min/1.73 m<sup>2</sup>' and several analyses were made to explore this: 'days with estimated GFR<60 ml/min/1.73 m<sup>2</sup>', 'risk of estimated GFR<60 ml/min/1.73 m<sup>2</sup> on day 1-7'. Secondary endpoints were a) delta eGFR after starting/stopping a drug, b) RIFLE-criteria Risk 'R', Injury 'I' and Failure 'F' [www.adqi.net](http://www.adqi.net). Analyses for renal failure endpoints were divided into: I) dichotomous endpoints to explore whether renal failure emerged during therapy with the investigated antibiotics and II) quantitative endpoints to explore whether existing renal failure was prolonged during therapy. Dichotomous endpoints were: 1) RIFLE-criteria 'R', 'I' and 'F' [www.adqi.net](http://www.adqi.net), 2) 'ever' eGFR<30 or 60 ml/min/1.73m<sup>2</sup>, Other endpoints explored were 3) 'ever' blood-urea level ≥20 mmol/L and eGFR<30. Quantitative endpoints were based on the time lived with eGFR<30 or 60 ml/min/1.73m<sup>2</sup> and the day-to-day change in eGFR.

The multiple effects eGFR 'slope' analyses, were adjusted for the following variables: treatment arm ('high exposure' vs. 'standard exposure'), age (≥65 vs. <65 years), gender, baseline APACHE II score (≥20 vs. <20), degree of host response/infection at baseline (severe sepsis/septic shock vs. milder or no infection as defined<sup>15</sup>), the eGFR at initiation of the investigated antibiotic, and finally, whether the patient at baseline was considered to be 'surgical' or 'medical'.

1  
2  
3  
4  
5  
6  
7 Comparisons were made between treatment arms using Students t-tests (for normal distributed  
8 continuous data) and Mann-Whitney U-tests (for non-normally distributed continuous data). Chi-  
9 squared tests and logistic regression models were used to test categorical variables. Time-to-event  
10 analyses comparing the 'high exposure' group with the 'standard exposure' group were performed  
11 using Kaplan-Meier plots and Cox proportional hazards models. Interactions were explored  
12 whenever an interaction could be rationally expected according to background literature, for the  
13 multivariate models performed. Statistical analyses were performed using STATA Version 10.2,  
14 and SAS version 9.1. All reported p-values are 2-sided using a level of significance of 0.05.  
15  
16  
17  
18  
19  
20  
21  
22  
23

#### 24 **Sample size**

25  
26 ~~For the present hypothesis, two sample size calculations were performed; one for a chi-square for~~  
27 ~~equal proportions analysis for the originally randomized arms, and one for a multivariable logistic~~  
28 ~~regression analysis, both with a limit for type I error of 5% and a power to avoid type II error of~~  
29 ~~80%. For the chi-square analysis, using a premise of the endpoint occurring in 20% of patients in~~  
30 ~~the 'standard exposure' group and with 1200 patients randomized, a detection limit (one-sided) for~~  
31 ~~relative risk of 1.3 in the 'high exposure' group was established. A~~  
32 ~~For the multivariate approach~~  
33 ~~power calculation was made. The summed squared correlations ( $\Sigma\rho^2$ ) to the risk of the~~  
34 ~~antibiotic drug investigated, was set to 0.3. The frequency of the endpoint in the 'standard exposure'~~  
35 ~~group was set to 20% and, the sample size was set to 1200, were set as for the chi-square analysis~~  
36 ~~and the frequency of the exposure was set at 30%, which resulted in a detection limit for odds ratio~~  
37 ~~of  $\geq 1.5$  (or  $\leq 0.67$ ).~~  
38  
39  
40  
41  
42  
43  
44  
45  
46  
47  
48  
49  
50  
51  
52  
53  
54  
55  
56  
57  
58  
59  
60

## Results

### *Baseline characteristics*

Nine sites included 1200 persons between 09/01/06 and 02/06/09. Eighty-three percent of the patients were assessed by the investigator to have an infection at baseline and 81% of the patients suffered from chronic co-morbidity. [Supplementary table 1](#) ~~Table 1~~ briefly summarizes baseline characteristics. Mortality was comparable between the two groups, as reported<sup>13</sup>.

### *Follow-up*

Follow-up for renal measures during the 28-day study period was made on 9,348 days in the 'standard-exposure' group of 10,755 days alive and admitted to hospital (86.9%) vs. 9,866 of 11,380 days in the 'high exposure group' (86.7%). If time after discharge from hospital (where no S-creatinine values were determined) until day 28 was included, the percentage of days with assessment of renal failure was 71.2% (9,348/13,130 days) vs. 73.8% (9,866/13,377 days)."

### *Use of Antibiotics*

The antibiotics used most while admitted to the ICU were piperacillin/tazobactam, cefuroxim, meropenem and ciprofloxacin, and there was a substantial higher use of piperacillin/tazobactam and ciprofloxacin in the 'high exposure' arm ([supplementary table 2](#) ~~table 2~~). Vancomycin was used to a lesser extent in both groups and aminoglycosides and colistin were used rarely in both groups.

The median length of an antibiotic course was prolonged using the 'high exposure'-algorithm (6 days (IQR 3, 11) vs. 4 days (IQR 3, 10),  $p=0.004$ ).

### *Renal failure in the originally randomized study arms*

The % of days within day 1-28 with  $eGFR \leq 60$  ml/min/m<sup>2</sup> was 48% in the 'high exposure' arm vs. 43% in the 'standard exposure' arm,  $p<0.0001$ . Results in [table 13](#) are estimated eGFR values, based on actual measured S-creatinine values; results regarding days with eGFR were comparable if

using the 'last observation carried forward' approach (not shown). RIFLE-criterion 'R' occurred more often within day 1-28 in the 'high exposure' arm than the 'standard exposure' arm: 209 patients vs. 170 patients,  $p=0.02$ , as did blood urea levels exceeding 20 mmol/L: 253 (43.4%) vs. 217 (37.4%),  $p=0.04$ .

The frequency of renal failure on the last day of follow-up was comparable between the arms (table 2), underlining that the results depicted in table 13 reflect a temporary extension of duration of renal failure in the "high exposure group" and furthermore that this observation is not explained by premature discharge of renally incompetent patients in the 'standard exposure' arm.

#### *Glomerular Filtration Rate changes and exposure to certain antibiotics*

Comparison of the eGFR of all patients (both study arms) for the first ten days after starting on the most frequently used betalactam antibiotics showed that the slowest recovery of renal function was observed in patients on piperacillin/tazobactam as compared to patients on meropenem or cefuroxim (figure 13). A multiple effects model investigating the eGFR regression coefficient ('increase in eGFR') per day on these drugs confirmed that renal recovery was lowest in patients on piperacillin/tazobactam (figure 4table 3). Of note, renal recovery seems to be low in patients exposed to cefuroxim, but as displayed in fig. 13, this drug is given to patients with a relatively normal renal function (leaving few possibilities for 'recovery').

For the first five days following discontinuation of these drugs, adjusting for the same variables, eGFR increased at the highest rate in patients receiving piperacillin/tazobactam (table 3), 2.7 ml/min/1.73 m<sup>2</sup> [95% CI: 2.3–3.1 ml/min/1.73 m<sup>2</sup>]; meropenem, 0.2 ml/min/1.73 m<sup>2</sup> [–0.5–0.9]; cefuroxim, 0.0 ml/min/1.73 m<sup>2</sup> [–0.4–0.4].

The frequency of eGFR<60 ml/min/1.73 m<sup>2</sup> on day 7 (or at death or last follow-up day) in the trial was 523/1200 = 43.6%. This endpoint was investigated in a forward censored ( $p<0.1$ ) logistic

Formatted: Font: 12 pt

Formatted: Font: 12 pt

Formatted: Font: 12 pt

Formatted: English (U.K.)

Formatted: Font: 12 pt, English (U.K.)

Formatted: English (U.K.)

1  
2  
3  
4  
5  
6  
7 regression. As a sensitivity analysis a logistic regression model with forward censoring of variables  
8 was built, where the endpoint was 'eGFR<60 ml/min/1.73 m<sup>2</sup> at day seven from study entry'.  
9 Variables were included if they were associated with the endpoint with p<0.1). Patients who died or  
10 who were discharged from hospital before day seven were counted with their last eGFR  
11 measurement. Use of piperacillin/tazobactam and other frequently used beta-lactam drugs for at  
12 least three days within these first seven days, as well as known and suspected predictors of renal  
13 failure were explored in a multivariable logistic regression analysis. Five independent predictors of  
14 renal failure on day 7 were identified: Age above 65 years, APACHE II score >20, Charlson's co-  
15 morbidity score ≥2, estimated GFR at baseline and use of piperacillin/tazobactam for at least 3 days  
16 within the first 7 days (table 4) for at least three days within these first seven days was found to be  
17 an independent predictor of eGFR<60 ml/min/1.73 m<sup>2</sup> at day seven (OR: 1.6 [95% CI: 1.1—2.4]);  
18 whereas treatment with cefuroxim (OR: 1.2 [95% CI: 0.8—1.8]) or meropenem (OR: 0.9 [95% CI:  
19 0.5—1.4]) for three days or more were not predictors of this endpoint. The following modifications  
20 did not alter the signal of this analysis: 1) excluding all patients who died within the first seven  
21 days, 2) excluding all patients with invasive fungal infection on day 1-28, 3) combining the  
22 betalactam exposure with exposure to flour-quinolone exposure (data not shown) or 4) adding  
23 'Alert-procalcitonin' at baseline as a variable, did not alter the signal (data not shown).  
24  
25  
26  
27  
28  
29  
30  
31  
32  
33  
34  
35  
36  
37  
38  
39  
40

Formatted: Font: Not Bold

Formatted: Font: Not Bold

## Discussion

### Principal findings

41  
42  
43 We observed that the duration of renal failure is prolonged in critically ill patients randomized to  
44 receive high exposure to broad-spectrum antibiotics and escalated diagnostic work-up according to  
45 a biomarker-strategy, compared to patients randomized to receive standard care according to  
46 guidelines regarding use of antibiotics and diagnostics. This difference in renal function was mainly  
47  
48  
49  
50  
51  
52  
53  
54  
55  
56  
57  
58  
59  
60

1  
2  
3  
4  
5  
6  
7 confined to a prolongation of existing renal dysfunction, since there was only a moderate, although  
8 significant, difference in de novo acute renal failure.

9  
10 To our knowledge, this study provides the first [clinical substantive report evidence](#) to inform this  
11 critical issue within ICU medicine. Firstly, the study was a randomized, good clinical practice  
12 controlled trial with a high sample size for comparison of organ failure, and the patients' baseline  
13 characteristics in general and specifically regarding renal parameters, were comparable. Secondly,  
14 the rate of follow-up, although not complete for the entire period, was high and equal among the  
15 groups and the rate of renal failure on the last day of follow-up in the two groups was comparable.  
16 Thus, the observed increased risk of persistent renal failure in the "high-exposure group" is  
17 attributable to this intervention in some way.

18  
19 The intervention consisted of an increased number of culture samples, a proposed initiative to do  
20 further diagnostic imaging (no observed difference) and a rapid and aggressive antibiotic escalation  
21 with certain drugs, which was documented to be of substantial extent ([supplementary table 2](#)). As a  
22 moderate increase in microbiologic sampling would not cause renal failure, and since there was no  
23 observed increase in diagnostic imaging, these interventions seems implausible reasons to explain  
24 the observations depicted in table [13](#).

25  
26 This leaves us with the documented (~~table 2~~) escalation in use of piperacillin/tazobactam and  
27 ciprofloxacin as possible explanations. Before concluding, that the observed renal dysfunction was  
28 caused directly by one (or both) of these drugs, we wanted to exclude the possibility that the results  
29 had appeared because of a derived effect of an increase in fungal infections. Fungal infections have  
30 been linked to broad-spectrum antibiotics<sup>16</sup>, and renal failure is a well-known complication to some  
31 antifungals<sup>17</sup>. However, excluding all patients with invasive fungal infections did not alter the  
32 results.

33  
34 Based on these results, and after having excluded other potential explanations, we realized  
35  
36  
37  
38  
39  
40  
41  
42  
43  
44  
45  
46  
47  
48  
49  
50  
51  
52  
53  
54  
55  
56  
57  
58  
59  
60



1  
2  
3  
4  
5  
6  
7 that nephrotoxicity from piperacillin/tazobactam and/or ciprofloxacin was the most plausible  
8 explanation of the observed renal dysfunction. To further substantiate this, several analyses were  
9 conducted. A multiple effects model was built to examine the GFR in the days after administration  
10 of different frequently used drugs. This model included the five most often administered antibiotics,  
11 including piperacillin/tazobactam, meropenem, cefuroxim, ciprofloxacin and vancomycin along  
12 with other known and suspected causes of renal failure. In this model, the use of  
13 piperacillin/tazobactam was associated with a striking low rate of GFR-improvement, compared to  
14 the other drugs investigated. Intriguingly, this adverse effect appears to be reversible, since patients  
15 in whom, piperacillin/tazobactam was discontinued, had the fastest improvement in renal function  
16 as compared with patients on other antibiotic courses. Several sensitivity analyses were performed  
17 with findings consistent with this observation.  
18  
19  
20  
21  
22  
23  
24  
25  
26  
27  
28  
29

### 30 **Comparison with other studies**

31 Although clinical evidence regarding renal failure according to use of piperacillin/tazobactam in  
32 ICU patients has been limited, the influence of piperacillin on renal function has been investigated  
33 in healthy volunteers in laboratory experiments. In a cross-over experiment, the influence on drug  
34 clearance from concurrent administration of piperacillin and flucloxacillin was estimated<sup>18</sup>. The  
35 authors observed that flucloxacillin clearance was reduced to 45% [90% CI: 40 – 50%] when  
36 piperacillin was administered simultaneously, whereas piperacillin clearance was unaffected by  
37 concurrent flucloxacillin administration. Time-clearance slope modeling identified competitive  
38 inhibition of renal tubular secretion as the most likely explanation. Piperacillin-induced reduction of  
39 imipenem clearance<sup>19</sup> and of tazobactam clearance has also been found<sup>20</sup>, and a high correlation  
40 between creatinin clearance and piperacillin clearance has been documented<sup>21</sup>, and thus, it is  
41 plausible that piperacillin specifically causes nephrotoxicity.  
42  
43  
44  
45  
46  
47  
48  
49  
50  
51  
52  
53  
54  
55  
56  
57  
58  
59  
60

1  
2  
3  
4  
5  
6  
7 Additionally, the published randomized trials comparing piperacillin/tazobactam with other beta-  
8 lactam drugs in intensive care unit settings are scarce, underpowered for assessment of renal failure  
9 endpoints and do generally not address renal endpoints<sup>5-7</sup>. Trials from other settings: haematological  
10 patients, diabetes patients, and surgical settings do generally not investigate renal failure endpoints,  
11 and in the few (non-ICU) trials that do report kidney endpoints, the total frequency of these makes  
12 the power to avoid type II error very low (diagram D2, online [digital](#) supplement).  
13  
14  
15  
16  
17  
18  
19

### 20 **Strengths and weaknesses of the study**

21  
22 Although our study is performed on analyses from a large randomized good clinical practice  
23 controlled trial with a stringent methodology and a high level of follow-up, there are limitations that  
24 deserve mentioning: First, follow-up for organ-related measures was not complete, although we  
25 followed patients for all blood samples done in 1) the hospital, at which they were initially  
26 recruited, 2) other hospitals in Denmark, where we had electronic access to blood samples.  
27 However, patients who continued to suffer from renal failure when discharged from hospital, were  
28 out of reach for follow-up for their renal function. Of note, the fraction of patients with remaining  
29 renal failure at time of discharge was comparable between the two groups (table [24](#)), and hence it is  
30 unlikely that this lack of ability to ascertain renal outcome contributed to our main findings.  
31  
32  
33  
34  
35  
36  
37  
38  
39  
40

41 Second, eGFR may not be an accurate measure of creatinine clearance, as recently documented by  
42 Martin et al.<sup>22</sup>. However, even though this measure is not accurate to describe the creatinine  
43 clearance, changes in eGFR reflect changes in renal function, as validated, and is closely correlated  
44 to outcome<sup>23</sup>. Additionally, we found that eGFR<60 ml/min/1.73 m<sup>2</sup> on day 7 is a strong  
45 independent predictor of mortality.  
46  
47  
48  
49

50 Second~~Third~~, the study was a post hoc analysis using a previously published trial as material. We  
51 have tried to compensate for this by writing a detailed analysis-plan based on the hypotheses, we  
52  
53  
54  
55  
56  
57  
58  
59  
60

1  
2  
3  
4  
5  
6  
7 wanted to test, before analysis. Third, although the sample size was relatively large compared to  
8  
9 most other randomized trials in this setting, the sample size for these secondary analyses were based  
10  
11 on the assumption of 25% renal failure in the 'standard exposure group' and a relative risk of 1.25  
12  
13 in the 'high exposure group'. The observed numbers were 21% and 1.22 which calls for a slightly  
14  
15 higher sample size. However, the sample size needed to show the differences observed in the  
16  
17 multivariable analyses was far smaller, and since these analyses confirmed the main findings, we do  
18  
19 not think the results are due to chance.

20  
21 In this trial, for the first time ever to our knowledge, random allocation to high exposure to broad-  
22  
23 spectrum antibiotics in the intensive care unit has been systematically applied according to a  
24  
25 systematic randomized algorithm and this resulted in prolongation of renal failure. The results were  
26  
27 confirmed when excluding patients with fungal infections, and a multiple effects model revealed a  
28  
29 particularly low renal recovery in patients while piperacillin/tazobactam was administered and a  
30  
31 remarkable recovery when discontinuing this drug; a finding that was specific for this drug. Several  
32  
33 other crude and adjusted models likewise confirmed the findings. Finally, the results from this trial  
34  
35 are supported by human experimental studies.

## 36 37 **Conclusion**

38  
39 In conclusion, the use of piperacillin/tazobactam caused a delayed renal recovery in critically ill  
40  
41 patients, and renal function improved after discontinuation of the drug. However, the study is not  
42  
43 designed to investigate -de novo emergence of renal failure, since the lowest renal function is at  
44  
45 baseline in most patients. We cannot within the sample size and follow-up time of this trial establish  
46  
47 whether the use of piperacillin/tazobactam, in some cases cause~~s~~ persistent renal failure, and thus,  
48  
49 further research to explore this is warranted. We think this impact on renal function is more likely  
50  
51 caused by a toxic effect on the renal tubule than by a lack of effect towards the infection, since this  
52  
53  
54  
55  
56  
57  
58  
59  
60

1  
2  
3  
4  
5  
6  
7 drug is independently associated with a high chance of survival in other infected populations<sup>8</sup>, and  
8  
9 we must emphasize that our findings are strictly confined to critically ill patients.  
10

### 11 12 13 **Contributors**

14 JUJ designed the study, made the data collection tools, monitored data collection for the whole trial,  
15 wrote the statistical analysis plan, and drafted the paper. He is guarantor. JUJ, ZF and JK  
16 cleaned and analysed the data. JL, BL, LH, MHB, TM, MHA, KJT, JL, MS, HT, PS-J, AØL, DGS,  
17 NR, KT, PCF, KML, NED, MEJ, LR, CØ, ZF, JK and JG made input study design, data collection  
18 tools and analysis plan and on the manuscript. JUJ implemented the trial at the centers. All  
19  
20 members of the Procalcitonin And Survival Study (PASS) Group assisted in designing the trial.  
21  
22 The members of the PASS study group are as follows: Central Coordinating Centre - J.U. Jensen,  
23  
24 B. Lundgren, J. Grarup, M.L. Jakobsen, S. S. Reilev, M. Kofoed-Djursner, J. D. Lundgren;  
25  
26 Regional Coordinating Centres - Hvidovre - J. Løken, M. Steensen; Gentofte - T. Mohr, K.  
27  
28 Thornberg, K. Thormar; Hillerød - L.Hein, M. Bestle; Glostrup - D. Strange, A.Ø. Lauritsen;  
29  
30 Herlev - H. Tousi, P. Søm-Jensen; Roskilde - N. Reiter, N.E. Drenck; Skejby - M.H. Andersen, P.  
31  
32 Fjeldborg; Århus - K.M. Larsen; Data Management & Statistical Centre - Z. Fox, J. Kjær, D.  
33  
34 Kristensen; Procalcitonin Analysis & Logistics Centre - J.U.Jensen, B. Lundgren, M. B.  
35  
36 Rasmussen, C. S.v.Hallas, M. Zacho, J. Iversen, T. Leerbeck, M. Jeppesen, K.S. Hansen, K.B.  
37  
38 Jensen; Data and Safety Monitoring Board - H. Masur (Chair), J. Chastre, H. Schönheyder, C.  
39  
40 Pedersen; Clinical Microbiology Management – B. Lundgren, J. D. Knudsen, A. Friis-Møller, K.  
41  
42 Schønning, A. Lester, H. Westh, G. Lisby, J.K. Møller, B. Bruun, J.J. Christensen, C. Østergaard,  
43  
44 M. Arpi, K. Astvad, M.D. Bartels, J. Engberg, H. Fjeldsøe-Nielsen, U.S. Jensen; PASS Site Clinical  
45  
46 Investigators (numbers of recruited persons are in parentheses) - Glostrup (290) – L. Hein, T.  
47  
48 Mohr, D. G. Strange, P. L. Petersen, A. Ø. Lauritsen, S. Hougaard, T. Mantoni, L. Nebrich, A.  
49  
50 Bendtsen, L.H. Andersen, F. Børentzen, Andreas Eversbusch, B. Bømler, R. Martusevicius, T.  
51  
52  
53  
54  
55  
56  
57  
58  
59  
60

1  
2  
3  
4  
5  
6  
7 Nielsen. P.M. Bådstøløkken, C. Maschmann, U. Grevstad, P. Hallas, A. Lindhardt, T. Galle, K.  
8  
9 Graeser, E. Hohwu-Christensen, P. Gregersen, H.C. Boesen, L.M. Pedersen, K. Thiesen, L.C.  
10  
11 Hallengreen, I. Rye, J. Cordtz, K.R. Madsen, P.R.C. Kirkegaard, L. Findsen, L.H. Nielsen, D.H.  
12  
13 Pedersen, J.H. Andersen, C. Albrechtsen, A. Jacobsen, T. Jansen, A.G. Jensen, H.H. Jørgensen, M.  
14  
15 Vazin; Gentofte (209) – L. Lipsius, K. Thornberg, J. Nielsen, K. Thormar, M. Skielboe, B. Thage,  
16  
17 C. Thoft, M. Ulbjerg, E. Anderlo, M. Engsig, F. Hani, R.B. Jacobsen. L. Mulla, U. Skram; Herlev  
18  
19 (154) – H. Tousi, P. Sjøe-Jensen, T. Waldau, T. Faber, B. Andersen, I. Gillesberg, A. Christensen,  
20  
21 C. Hartmann, R. Albret, D.S. Dinesen, K. Gani, M. Ibsen; Hvidovre (148) – J. Løken, M. Steensen,  
22  
23 J.A. Petersen, P. Carl, E. Gade, D. Solevad, C. Heiring, M. Jørgensen, K. Ekelund, A. Afshari, N.  
24  
25 Hammer, M. Bitsch, J.S. Hansen, C. Wamberg, T.D. Clausen, R. Winkel, J. Huusom, D.L. Buck, U.  
26  
27 Grevstad, E. Aasvang, K. Lenz, P. Mellado, H. Karacan, J. Hidestål, J. Høgagard, J. Højbjerg, J.  
28  
29 Højlund, M. Johansen, S. Strande; Hillerød (138) – M. Bestle, S. Hestad, M. Østergaard, N.  
30  
31 Wesche, S.A. Nielsen, H. Christensen, H. Blom, C.H. Jensen K. Nielsen, N.G. Holler, K.A.  
32  
33 Jeppesen; Århus-Skejby (94) – M.H. Andersen, P. Fjeldborg, A. Vestergaard, O. Viborg, C.D.  
34  
35 Rossau; Roskilde (90) – N. Reiter, M. Glæmose, M.B.Wranér, C.B. Thomsen, B. Rasmussen, C.  
36  
37 Lund-Rasmussen, B. Bech, K. Bjerregaard, L. Spliid, L.L.W. Nielsen, N.E. Drenck; Århus-Centre  
38  
39 (63) – K.M. Larsen, M. Goldinger, D. Illum, C. Jessen, A. Christiansen, A. Berg, T. Elkman,  
40  
41 J.A.K. Pedersen, M. Simonsen; Bispebjerg (14) H. Joensen, H. Alstrøm, C. Svane, A. Engquist.  
42  
43 Supported by grants from the Danish Research Council, The Lundbeck Foundation, Research  
44  
45 Foundation for the Capital Region of Denmark, The Toyota Foundation, Brahms diagnostica (un-  
46  
47 restricted grant), The Harboe Foundation, The A.P. Møller Foundation and the Idella Foundation.  
48  
49 None of these had any influence on the design or conduct of the study; collection, management,  
50  
51 analysis, and interpretation of the data; nor the preparation, or approval of the manuscript. All  
52  
53 authors had full access to all of the data in the study and conjointly take responsibility for the  
54  
55 integrity of the data and the accuracy of the data analysis.  
56  
57  
58  
59  
60

**Funding**

Supported by grants from the Danish Research Council, The Lundbeck Foundation, Research Foundation for the Capital Region of Denmark, The Toyota Foundation, Brahms diagnostica (unrestricted grant), The Harboe Foundation, The A.P. Møller Foundation and the Idella Foundation. None of these had any influence on the design or conduct of the study; collection, management, analysis, and interpretation of the data; nor the preparation, or approval of the manuscript.

**Competing interests**

All authors have completed the Unified Competing Interest form at [www.icmje.org/coi\\_disclosure.pdf](http://www.icmje.org/coi_disclosure.pdf) (available on request from the corresponding author) and declare that the trial was funded mainly by the Danish State (Danish Research Council) and : all authors state that they have no relationships with companies that might have an interest in the submitted work in the previous 3 years; their spouses, partners, or children have no financial relationships that may be relevant to the submitted work; and all authors have no non-financial interests that may be relevant to the submitted work.

**Ethical approval**

The study was approved by the ethics committee for Copenhagen and Frederiksberg community (now Ethics Committee for the Capitol Region): H-KF-01-272-753. Patient consent: We received written consent from the patient or the next of kin for trial inclusion.

**Data sharing**

No additional data available.

**References**

1. Levy MM, Macias WL, Vincent JL, Russell JA, Silva E, Trzaskoma B, et al. Early changes in organ function predict eventual survival in severe sepsis. *Crit Care Med*. 2005; **33**(10): 2194-201.
2. Jia X, Malhotra A, Saeed M, Mark RG, Talmor D. Risk factors for ARDS in patients receiving mechanical ventilation for > 48 h. *Chest*. 2008; **133**(4): 853-61.

Field Code Changed

3. Rubenfeld GD, Caldwell E, Peabody E, Weaver J, Martin DP, Neff M, et al. Incidence and outcomes of acute lung injury. *N Engl J Med*. 2005; **353**(16): 1685-93.
4. Kane-Gill SL, Jacobi J, Rothschild JM. Adverse drug events in intensive care units: risk factors, impact, and the role of team care. *Crit Care Med*. 2010; **38**(6 Suppl): S83-9.
5. Brun-Buisson C, Sollet JP, Schweich H, Briere S, Petit C. Treatment of ventilator-associated pneumonia with piperacillin-tazobactam/amikacin versus ceftazidime/amikacin: a multicenter, randomized controlled trial. VAP Study Group. *Clin Infect Dis*. 1998; **26**(2): 346-54.
6. Alvarez-Lerma F, Insausti-Ordenana J, Jorda-Marcos R, Maravi-Poma E, Torres-Marti A, Nava J, et al. Efficacy and tolerability of piperacillin/tazobactam versus ceftazidime in association with amikacin for treating nosocomial pneumonia in intensive care patients: a prospective randomized multicenter trial. *Intensive Care Med*. 2001; **27**(3): 493-502.
7. Marra F, Reynolds R, Stiver G, Bryce E, Sleight K, Frighetto L, et al. Piperacillin/tazobactam versus imipenem: a double-blind, randomized formulary feasibility study at a major teaching hospital. *Diagn Microbiol Infect Dis*. 1998; **31**(2): 355-68.
8. Paul M, Yahav D, Bivas A, Fraser A, Leibovici L. Anti-pseudomonal beta-lactams for the initial, empirical, treatment of febrile neutropenia: comparison of beta-lactams. *Cochrane Database Syst Rev*. 2010; **11**: CD005197.
9. Reich G, Cornely OA, Sandherr M, Kubin T, Krause S, Einsele H, et al. Empirical antimicrobial monotherapy in patients after high-dose chemotherapy and autologous stem cell transplantation: a randomised, multicentre trial. *Br J Haematol*. 2005; **130**(2): 265-70.
10. Gomez L, Estrada C, Gomez I, Marquez M, Estany C, Marti JM, et al. Low-dose beta-lactam plus amikacin in febrile neutropenia: cefepime vs. piperacillin/tazobactam, a randomized trial. *Eur J Clin Microbiol Infect Dis*. 2010; **29**(4): 417-27.
11. Sato T, Kobayashi R, Yasuda K, Kaneda M, Iguchi A, Kobayashi K. A prospective, randomized study comparing ceftazidime with piperacillin-tazobactam plus ceftazidime as empirical therapy for febrile neutropenia in children with hematological disorders. *Pediatr Blood Cancer*. 2008; **51**(6): 774-7.
12. Bow EJ, Rotstein C, Noskin GA, Laverdiere M, Schwarzer AP, Segal BH, et al. A randomized, open-label, multicenter comparative study of the efficacy and safety of piperacillin-tazobactam and cefepime for the empirical treatment of febrile neutropenic episodes in patients with hematologic malignancies. *Clin Infect Dis*. 2006; **43**(4): 447-59.
13. Jensen JU, Hein L, Lundgren B, Bestle MH, Mohr TT, Andersen MH, et al. Procalcitonin-guided interventions against infections to increase early appropriate antibiotics and improve survival in the intensive care unit: A randomized trial. *Crit Care Med*. 2011.
14. Dellinger RP, Levy MM, Carlet JM, Bion J, Parker MM, Jaeschke R, et al. Surviving Sepsis Campaign: international guidelines for management of severe sepsis and septic shock: 2008. *Crit Care Med*. 2008; **36**(1): 296-327.
15. Levy MM, Fink MP, Marshall JC, Abraham E, Angus D, Cook D, et al. 2001 SCCM/ESICM/ACCP/ATS/SIS International Sepsis Definitions Conference. *Crit Care Med*. 2003; **31**(4): 1250-6.
16. Hebert C, Villaran R, Tolentino J, Best L, Boonlayangoor S, Pitrak D, et al. Prior antimicrobial exposure and the risk for bloodstream infection with fluconazole-non-susceptible *Candida* strains. *Scand J Infect Dis*. 2010; **42**(6-7): 506-9.
17. Sorkine P, Nagar H, Weinbroum A, Setton A, Israitel E, Scarlatt A, et al. Administration of amphotericin B in lipid emulsion decreases nephrotoxicity: results of a prospective, randomized, controlled study in critically ill patients. *Crit Care Med*. 1996; **24**(8): 1311-5.

Formatted: Danish

Formatted: Danish

Formatted: Danish

- 1  
2  
3  
4  
5  
6  
7 18. Landersdorfer CB, Kirkpatrick CM, Kinzig M, Bulitta JB, Holzgrabe U, Sorgel F.  
8 Inhibition of flucloxacillin tubular renal secretion by piperacillin. *Br J Clin Pharmacol*. 2008; **66**(5):  
9 648-59.
- 10 19. Saitoh H, Oda M, Gyotoku T, Kobayashi M, Fujisaki H, Sekikawa H. A beneficial  
11 interaction between imipenem and piperacillin possibly through their renal excretory process. *Biol*  
12 *Pharm Bull*. 2006; **29**(12): 2519-22.
- 13 20. Komuro M, Maeda T, Kakuo H, Matsushita H, Shimada J. Inhibition of the renal  
14 excretion of tazobactam by piperacillin. *J Antimicrob Chemother*. 1994; **34**(4): 555-64.
- 15 21. Aronoff GR, Sloan RS, Brier ME, Luft FC. The effect of piperacillin dose on  
16 elimination kinetics in renal impairment. *Eur J Clin Pharmacol*. 1983; **24**(4): 543-7.
- 17 22. Martin JH, Fay MF, Udy A, Roberts J, Kirkpatrick C, Ungerer J, et al. Pitfalls of using  
18 estimations of glomerular filtration rate in an intensive care population. *Intern Med J*. 2011.
- 19 23. Bagshaw SM, George C, Dinu I, Bellomo R. A multi-centre evaluation of the RIFLE  
20 criteria for early acute kidney injury in critically ill patients. *Nephrol Dial Transplant*. 2008; **23**(4):  
21 1203-10.
- 22  
23  
24  
25  
26  
27  
28  
29  
30  
31  
32  
33  
34  
35  
36  
37  
38  
39  
40  
41  
42  
43  
44  
45  
46  
47  
48  
49  
50  
51  
52  
53  
54  
55  
56  
57  
58  
59  
60





**Kidney failure related to broad-spectrum antibiotics in critically ill patients: secondary end point results from a 1200 patient randomized trial**

|                               |                                                                                                                                                                                                                                                                                                                                                                                                                                                                                                                                                                                                                                                                                                                                                                                                                                                                                                                                                                                                                                                                                                                                                                                                                                                                                                                                                                                                                                                                                                                                                                                                                                                                                                                                                                                                                                                                                                                                                                                                                                                                                                                                                                                                                                                                                                                       |
|-------------------------------|-----------------------------------------------------------------------------------------------------------------------------------------------------------------------------------------------------------------------------------------------------------------------------------------------------------------------------------------------------------------------------------------------------------------------------------------------------------------------------------------------------------------------------------------------------------------------------------------------------------------------------------------------------------------------------------------------------------------------------------------------------------------------------------------------------------------------------------------------------------------------------------------------------------------------------------------------------------------------------------------------------------------------------------------------------------------------------------------------------------------------------------------------------------------------------------------------------------------------------------------------------------------------------------------------------------------------------------------------------------------------------------------------------------------------------------------------------------------------------------------------------------------------------------------------------------------------------------------------------------------------------------------------------------------------------------------------------------------------------------------------------------------------------------------------------------------------------------------------------------------------------------------------------------------------------------------------------------------------------------------------------------------------------------------------------------------------------------------------------------------------------------------------------------------------------------------------------------------------------------------------------------------------------------------------------------------------|
| Journal:                      | <i>BMJ Open</i>                                                                                                                                                                                                                                                                                                                                                                                                                                                                                                                                                                                                                                                                                                                                                                                                                                                                                                                                                                                                                                                                                                                                                                                                                                                                                                                                                                                                                                                                                                                                                                                                                                                                                                                                                                                                                                                                                                                                                                                                                                                                                                                                                                                                                                                                                                       |
| Manuscript ID:                | bmjopen-2011-000635.R2                                                                                                                                                                                                                                                                                                                                                                                                                                                                                                                                                                                                                                                                                                                                                                                                                                                                                                                                                                                                                                                                                                                                                                                                                                                                                                                                                                                                                                                                                                                                                                                                                                                                                                                                                                                                                                                                                                                                                                                                                                                                                                                                                                                                                                                                                                |
| Article Type:                 | Research                                                                                                                                                                                                                                                                                                                                                                                                                                                                                                                                                                                                                                                                                                                                                                                                                                                                                                                                                                                                                                                                                                                                                                                                                                                                                                                                                                                                                                                                                                                                                                                                                                                                                                                                                                                                                                                                                                                                                                                                                                                                                                                                                                                                                                                                                                              |
| Date Submitted by the Author: | 09-Feb-2012                                                                                                                                                                                                                                                                                                                                                                                                                                                                                                                                                                                                                                                                                                                                                                                                                                                                                                                                                                                                                                                                                                                                                                                                                                                                                                                                                                                                                                                                                                                                                                                                                                                                                                                                                                                                                                                                                                                                                                                                                                                                                                                                                                                                                                                                                                           |
| Complete List of Authors:     | <p>Jensen, Jens-Ulrik; Faculty of Health Sciences, University of Copenhagen, Copenhagen HIV Programme; University Hospital of Copenhagen, Bispebjerg, Pulmonary Medicine (L)</p> <p>Hein, Lars; Copenhagen University Hospital Hillerød, Department of Anesthesia and Intensive Care ; Copenhagen University Hospital Glostrup, Department of Anesthesia and Intensive Care</p> <p>Lundgren, Bettina; University Hospital of Copenhagen Rigshospitalet, Diagnostic Centre</p> <p>Bestle, Morten; Copenhagen University Hospital Hillerød, Department of Anesthesia and Intensive Care</p> <p>Mohr, Thomas; Copenhagen University Hospital Gentofte, Department of Anesthesia and Intensive Care</p> <p>Andersen, Mads; Aarhus University Hospital in Skejby, Department of Anesthesia and Intensive Care</p> <p>Thornberg, Klaus; Copenhagen University Hospital Gentofte, Department of Anesthesia and Intensive Care</p> <p>Løken, Jesper; Copenhagen University Hospital Hvidovre, Department of Anesthesia and Intensive Care</p> <p>Steensen, Morten; Copenhagen University Hospital Hvidovre, Department of Anesthesia and Intensive Care</p> <p>Fox, Zoë; Royal Free Hospital School of Medicine in London, Research Department of Infection and Population Health; University of Copenhagen, Faculty of Health Sciences, Copenhagen HIV Programme</p> <p>Tousi, Hamid; Copenhagen University Hospital Herlev, Department of Anesthesia and Intensive Care</p> <p>Søe-Jensen, Peter; Copenhagen University Hospital Herlev, Department of Anesthesia and Intensive Care</p> <p>Lauritsen, Anne; Copenhagen University Hospital Glostrup, Department of Anesthesia and Intensive Care</p> <p>Strange, Ditte; Copenhagen University Hospital Glostrup, Department of Anesthesia and Intensive Care</p> <p>Reiter, Nanna; University Hospital in Roskilde, Department of Anesthesia and Intensive Care</p> <p>Thormar, Katrin; Copenhagen University Hospital Gentofte, Department of Anesthesia and Intensive Care</p> <p>Fjeldbord, Paul; Aarhus University Hospital in Skejby, Department of Anesthesia and Intensive Care</p> <p>Larsen, Kim; Aarhus University Hospital in Aarhus, Department of Anesthesia and Intensive Care</p> <p>Drenck, Niels-Erik; University Hospital in Roskilde, Department of</p> |

|                                 |                                                                                                                                                                                                                                                                                                                                                                                                                                                                                                                                                                                                                                                                                                    |
|---------------------------------|----------------------------------------------------------------------------------------------------------------------------------------------------------------------------------------------------------------------------------------------------------------------------------------------------------------------------------------------------------------------------------------------------------------------------------------------------------------------------------------------------------------------------------------------------------------------------------------------------------------------------------------------------------------------------------------------------|
|                                 | Anesthesia and Intensive Care<br>Østergaard, Christian; Copenhagen University Hospital Hvidovre, Clinical Microbiology<br>Johansen, Maria; University of Copenhagen, Faculty of Health Sciences, Copenhagen HIV Programme<br>Nielsen, Lene; University of Copenhagen, Faculty of Health Sciences, Copenhagen HIV Programme<br>Kjær, Jesper; University of Copenhagen, Faculty of Health Sciences, Copenhagen HIV Programme<br>Grarup, Jesper; University of Copenhagen, Faculty of Health Sciences, Copenhagen HIV Programme<br>Lundgren, Jens; University of Copenhagen, Faculty of Health Sciences, Copenhagen HIV Programme; Copenhagen University Hospital Rigshospitalet, Infectious Diseases |
| <b>Primary Subject Heading</b>: | Infectious diseases                                                                                                                                                                                                                                                                                                                                                                                                                                                                                                                                                                                                                                                                                |
| Secondary Subject Heading:      | Renal medicine, Intensive care, Patient-centred medicine, Pharmacology & therapeutics                                                                                                                                                                                                                                                                                                                                                                                                                                                                                                                                                                                                              |
| Keywords:                       | Adult intensive & critical care < ANAESTHETICS, Acute renal failure < NEPHROLOGY, Adverse events < THERAPEUTICS, Toxicity < THERAPEUTICS, Clinical trials < THERAPEUTICS                                                                                                                                                                                                                                                                                                                                                                                                                                                                                                                           |
|                                 |                                                                                                                                                                                                                                                                                                                                                                                                                                                                                                                                                                                                                                                                                                    |

SCHOLARONE™  
Manuscripts

Review only

1  
2  
3 Kidney failure related to broad-spectrum antibiotics in critically ill  
4  
5  
6 patients: secondary end point results from a 1200 patient randomized trial  
7

8  
9 Corresponding author Jens-Ulrik Jensen, Copenhagen HIV Programme, The Panum Institute,  
10  
11 Faculty of Health Sciences, University of Copenhagen, Blegdamsvej 3B, DK-2200 Copenhagen N,  
12  
13 [juj@cphiv.dk](mailto:juj@cphiv.dk)  
14

15 Jens Ulrik Jensen *medical doctor*<sup>1,2</sup>, Lars Hein *anaesthetist*<sup>3,4</sup>, Bettina Lundgren *centre director*,  
16  
17 *hospital diagnostic centre*<sup>2,5</sup>, Morten Heiberg Bestle *anaesthetist*<sup>4</sup>, Thomas Mohr *anaesthetist*<sup>6</sup>,  
18  
19 Mads Holmen Andersen *anaesthetist*<sup>7</sup>, Klaus Julius Thornberg *anaesthetist*<sup>6</sup>, Jesper Løken  
20  
21 *anaesthetist*<sup>8</sup>, Morten Steensen *anaesthetist*<sup>8</sup>, Zoe Fox *biostatistician*<sup>1,9</sup>, Hamid Tousi *anaesthetist*<sup>10</sup>,  
22  
23 Peter Søe-Jensen *anaesthetist*<sup>10</sup>, Anne Øberg Lauritsen *anaesthetist*<sup>3</sup>, Ditte Gry Strange  
24  
25 *anaesthetist*<sup>3</sup>, Nanna Reiter *anaesthetist*<sup>11</sup>, Katrin Thormar *anaesthetist*<sup>6</sup>, Paul Christian Fjeldborg  
26  
27 *anaesthetist*<sup>7</sup>, Kim Michael Larsen *anaesthetist*<sup>12</sup>, Niels-Erik Drenck *anaesthetist*<sup>11</sup> Maria Egede  
28  
29 Johansen *junior research associate*<sup>1</sup>, Lene Ryom *junior research executive*<sup>1</sup>, Christian Østergaard  
30  
31 *senior research executive*<sup>2,13</sup>, Jesper Kjær *database manager*<sup>1</sup>, Jesper Grarup *administrative leader*  
32  
33 <sup>1</sup>, Jens D. Lundgren *professor of infectious diseases*<sup>1,14</sup> of the The Procalcitonin And Survival  
34  
35 Study (PASS) Group\*.  
36  
37

38  
39  
40 <sup>1</sup>Copenhagen HIV Programme at the University of Copenhagen; <sup>2</sup>Department of Clinical  
41  
42 Microbiology at Copenhagen University Hospital Hvidovre; <sup>3</sup>Department of Anesthesia and  
43  
44 Intensive Care at Copenhagen University Hospital Glostrup; <sup>4</sup>Department of Anesthesia and  
45  
46 Intensive Care at Copenhagen University Hospital Hillerød; <sup>5</sup>Diagnostic Centre at Copenhagen  
47  
48 University Hospital Rigshospitalet; <sup>6</sup>Department of Anesthesia and Intensive Care at Copenhagen  
49  
50 University Hospital Gentofte; <sup>7</sup>Department of Anesthesia and Intensive Care at Aarhus University  
51  
52 Hospital in Skejby; <sup>8</sup>Department of Anesthesia and Intensive Care at Copenhagen University  
53  
54 Hospital Hvidovre; <sup>9</sup>Royal Free Hospital School of Medicine in London; <sup>10</sup>Department of  
55  
56  
57  
58  
59  
60

1  
2  
3 Anesthesia and Intensive Care at Copenhagen University Hospital Herlev; <sup>11</sup>Department of  
4  
5 Anesthesia and Intensive Care at Copenhagen University Hospital in Roskilde; <sup>12</sup>Department of  
6  
7 Anesthesia and Intensive Care at Aarhus University Hospital in Aarhus; <sup>13</sup>Department of Clinical  
8  
9 Microbiology at Copenhagen University Hospital Herlev; <sup>14</sup>Department of Infectious Diseases at  
10  
11 Copenhagen University Hospital Rigshospitalet. All except<sup>9</sup> are from Denmark. <sup>9</sup> is from England.

12  
13  
14 \*Participating investigators are listed in the appendix.

15  
16 Running Title: Broad-Spectrum Antibiotics and Renal Failure in Critically Ill Patients

17  
18 Keywords: Antibiotics – Renal Failure – Sepsis – Intensive Care  
19  
20

21  
22 **Copyright:** The Corresponding Author has the right to grant on behalf of all authors and does grant  
23  
24 on behalf of all authors, an exclusive licence (or non exclusive for government employees) on a  
25  
26 worldwide basis to the BMJ Publishing Group Ltd and its licensees , to permit this article (if  
27  
28 accepted) to be published in BMJ editions and any other BMJPG products and to exploit all  
29  
30 subsidiary rights, as set out in our licence.  
31  
32  
33  
34  
35  
36  
37  
38  
39  
40  
41  
42  
43  
44  
45  
46  
47  
48  
49  
50  
51  
52  
53  
54  
55  
56  
57  
58  
59  
60

## Abstract

Objectives: To explore whether a strategy of more intensive antibiotic therapy leads to emergence or prolongation of renal failure in intensive care patients.

Design: Secondary analysis from a randomized antibiotic strategy trial (the PASS study). The randomized arms were conserved from the primary trial for the main analysis.

Setting: Nine mixed surgical/medical intensive care units across Denmark.

Participants: 1200 adult intensive care patients, 18+ years, expected to stay +24 hours. Exclusion criteria: Bilirubin >40 mg/dL. Triglycerides >1000 mg/dL, Increased risk from blood sampling, pregnant/breast feeding and psychiatric patients.

Interventions: Patients were randomized to: guideline-based therapy ('standard-exposure'-arm), or to guideline-based therapy supplemented with antibiotic escalation whenever procalcitonin increased on daily measurements ('high-exposure'-arm).

Main outcome measures: Primary endpoint: estimated GFR<60 ml/min/1.73 m<sup>2</sup>. Secondary endpoints: a) delta eGFR after starting/stopping a drug, b) RIFLE criterion *Risk* "R", *Injury* 'I' and *Failure* 'F'. Analysis was by intention to treat.

Results: 28-day mortality was 31.8% and comparable (Jensen et al, CCM 2011). A total of 3672/7634 (48.1%) study days during follow-up in the 'high-exposure' vs. 3016/6949 (43.4%) in the 'standard-exposure'-arm were spent with eGFR <60 ml/min/1.73m<sup>2</sup>, p<0.001. In a multiple effects model, piperacillin/tazobactam was identified as causing the lowest rate of renal recovery of all antibiotics: 1.0 ml/min/1.73 m<sup>2</sup> per 24h while exposed to this drug [95% CI: 0.7 – 1.3 ml/min/1.73 m<sup>2</sup>/24h] vs. meropenem: 2.9 ml/min/1.73 m<sup>2</sup>/24h [2.5 – 3.3 ml/min/1.73 m<sup>2</sup>/24h]); after discontinuing piperacillin/tazobactam, the renal recovery rate increased: 2.7 ml/min/1.73 m<sup>2</sup> /24h [2.3 – 3.1 ml/min/1.73 m<sup>2</sup> /24h)]. eGFR<60 ml/min/1.73m<sup>2</sup> in the two groups at entry and at last day of follow-up was 57% vs. 55% and 41% vs. 39%, resp.

1  
2  
3 Conclusions: Piperacillin/tazobactam was identified as a cause of delayed renal recovery in  
4  
5 critically ill patients. This nephrotoxicity was not observed when using other beta-lactam  
6  
7 antibiotics.  
8

9  
10 Trial registration ClinicalTrials.gov identifier: NCT00271752.  
11

## 12 13 14 **Introduction**

15  
16  
17 Frequent complications to sepsis are organ failure, especially respiratory failure and renal failure<sup>1-3</sup>.  
18  
19 Critically ill patients are more vulnerable to organ-related drug toxicities than less severely ill  
20  
21 patients<sup>4</sup>. Randomized trials assessing safety of broad-spectrum antibiotics in intensive care settings  
22  
23 are generally scarce, do not have sufficient statistical power for assessing organ failure endpoints,  
24  
25 and do often not include defined kidney organ failure endpoints<sup>5-7</sup>. Data on renal failure endpoints  
26  
27 are also sparse in the published trials from other patient populations, and since the absolute risk of  
28  
29 renal failure is low for these patients, analyses may likely have been underpowered<sup>8-12</sup>.  
30  
31

32  
33 To our knowledge, randomized trials comparing ‘high exposure’ vs. ‘standard exposure to  
34  
35 antibiotics’ and specifically addressing whether these interventions affect the occurrence and  
36  
37 duration of kidney failure have not been done before in intensive care settings.  
38

39  
40 In this secondary analysis from a randomized trial, the PASS study<sup>13</sup>, we aimed to explore whether  
41  
42 a strategy of more intensive antibiotic therapy leads to adverse renal outcomes within 28 days after  
43  
44 recruitment.  
45

46  
47 In our study population (and often in severely infected ICU patients), a bacterial hit has resulted in  
48  
49 acute onset renal failure, and this bacterial hit (and related organ failure) is often the reason for ICU  
50  
51 admittance. In such situations, with the correct treatment of the underlying infection, we expect  
52  
53 renal function to recover. “Lack of recovery” is a non-desirable situation, which may be very  
54  
55 serious for the patient. We wanted to explore this, and realizing, RIFLE/AKIN could not capture  
56  
57  
58  
59  
60

1  
2  
3 this, we have used  $eGFR < 60 \text{ ml/min/1.73 m}^2$  as the primary endpoint and examined this from  
4  
5 different angles ( $eGFR < 60 \text{ ml/min/1.73 m}^2$  at day 7, days with  $\text{ml/min/1.73 m}^2$ ). The multiple  
6  
7 effects model was built to capture actual estimates of renal function improvement using different  
8  
9 antibiotics and adjusting for other known or suspected causes of renal dysfunction.  
10  
11 Secondly, if renal failure was observed from the 'high exposure' approach, to identify one or  
12  
13 several of the antibiotics used in this trial as the cause of such a renal failure.  
14

## 15 16 **Methods**

### 17 18 **Trial design and participants**

19  
20 *PASS* is a multicentre randomized controlled trial in Denmark 2006-9 in 1200 adult critically ill  
21  
22 patients, expected to stay in one of the nine participating mixed medical/surgical intensive care  
23  
24 units  $\geq 24$  hours; the CONSORT trial diagram is displayed in supplementary figure 1. Patients were  
25  
26 randomized 1:1 either to treatment according to international guidelines: 'standard exposure arm',  
27  
28 or to same guidelines but supplemented with daily drug-escalation initiated upon procalcitonin  
29  
30 increases ('high exposure'-arm); 28-day mortality was 31.8% and comparable between the two  
31  
32 groups, as reported<sup>13</sup>.  
33  
34

35  
36 To be eligible, patients had to be  $\geq 18$  years, enrolled within 24 hours of admission to the intensive  
37  
38 care unit and have an expected intensive care-admission length of  $\geq 24$  hours. Patients with known  
39  
40 bilirubin  $> 40 \text{ mg/dL}$  and triglycerides  $> 1000 \text{ mg/dL}$  (not suspensive) were not eligible (interference  
41  
42 with procalcitonin measurements), as were patients who were judged to be at an increased risk from  
43  
44 blood sampling. The inclusion criteria were broad since infection is frequent and often causes  
45  
46 complications in the patient group and to increase the external validity of the results. The person or  
47  
48 next of kin gave informed consent. The study protocol was approved by the regional ethics  
49  
50 committees in Denmark (H-KF-272-753) and adheres to the Helsinki declaration, revised in Seoul  
51  
52 2008.  
53  
54  
55  
56  
57  
58  
59  
60

1  
2  
3 In the present analyses we explored presence and duration of renal failure as well as change in renal  
4 function during the observed time. Endpoints are defined in *statistical analysis* below. Patients  
5 were followed until day 28. The primary trial protocol and the analysis plan is available in the  
6 online supplement. Analysis was by intention to treat: NCT00271752.  
7  
8  
9

### 10 11 **Randomization and masking**

12  
13 Randomization was performed 1:1 using a computerized algorithm created by the database manager  
14 (JK) with concealed block-size, pre-stratified for site of recruitment, initial APACHE-II and age  
15 (entered in an encrypted screening form in a password protected website); investigators were  
16 masked to assignment before, but not after, randomization. All investigators were trained by the  
17 coordinating centre and had to register in an investigator-database. Investigators, treating physicians  
18 and the coordinator were unaware of outcomes during the study, as were they of all procalcitonin  
19 measurements in the 'standard exposure' (control)-group.  
20  
21  
22  
23  
24  
25  
26  
27  
28  
29  
30  
31

### 32 **Antibiotic therapy in the two arms**

33  
34 The investigators enrolled participants and assigned the 'high exposure group' participants to the  
35 intervention. In the 'standard exposure' group, the antimicrobial treatment was guided according to  
36 current clinical guidelines<sup>14</sup>, based on clinical assessment, microbiology and radiology among other  
37 parameters, as described elsewhere<sup>13</sup>  
38  
39  
40  
41

42  
43 In the 'high exposure' group, the use of antimicrobial interventions was guided by the same clinical  
44 guidelines as in the 'standard exposure' group to ascertain the best standard of care therapy for all  
45 patients, and additionally antimicrobial interventions were initiated whenever procalcitonin levels  
46 were not decreasing at a pre-defined pace (supplementary figure 2) and diagram D1 in the online  
47 supplement where a site-adjusted local guideline is displayed.  
48  
49  
50  
51  
52  
53  
54  
55  
56  
57  
58  
59  
60



### Measurements, data collection and follow-up

Blood samples for biomarker measurement were made daily in the intensive care unit, beginning immediately after randomization. The assay used was the Kryptor®-PCT. Organ failure and antibiotic exposure was followed up for until 28 days or death, as described<sup>13</sup>. Mortality was followed via the National Patient Register in which all deaths in Denmark are registered within 14 days. Good Clinical Practice guidelines were applied. The regional ethics board approved the protocol (H-KF-01-272-753).

### Statistical analysis

The primary endpoint was 'estimated GFR<60 ml/min/1.73 m<sup>2</sup>' and several analyses were made to explore this: 'days with estimated GFR<60 ml/min/1.73 m<sup>2</sup>', 'risk of estimated GFR<60 ml/min/1.73 m<sup>2</sup> on day 1-7'. Secondary endpoints were a) delta eGFR after starting/stopping a drug, b) RIFLE-criteria *Risk* 'R', *Injury* 'I' and *Failure* 'F' [www.adqi.net](http://www.adqi.net). Since we explored exposure of antibiotics from baseline and forth (and not pre-ICU), in the RIFLE definition, the baseline creatinine was used (instead of an ideal eGFR). eGFR was calculated for every day. To not let this be influenced by hydration status, the baseline weight was used, and thus the relation between se-creatinine and eGFR was a first degree function for every patient. Other endpoints explored were 'ever' blood-urea level  $\geq 20$  mmol/L and eGFR<30.

The multiple effects eGFR 'slope' analyses, were adjusted for the following variables: treatment arm ('high exposure' vs. 'standard exposure'), age ( $\geq 65$  vs.  $< 65$  years), gender, baseline APACHE II score ( $\geq 20$  vs.  $< 20$ ), degree of host response/infection at baseline (severe sepsis/septic shock vs. milder or no infection as defined<sup>15</sup>), the eGFR at initiation of the investigated antibiotic, and finally, whether the patient at baseline was considered to be 'surgical' or 'medical'.

Comparisons were made between treatment arms using Students t-tests (for normal distributed continuous data) and Mann-Whitney U-tests (for non-normally distributed continuous data). Chi-squared tests and logistic regression models were used to test categorical variables. Time-to-event

1  
2  
3 analyses comparing the 'high exposure' group with the 'standard exposure' group were performed  
4  
5 using Kaplan-Meier plots and Cox proportional hazards models. Interactions were explored  
6  
7 whenever an interaction could be rationally expected according to background literature, for the  
8  
9 multivariate models performed. Statistical analyses were performed using STATA Version 10.2,  
10  
11 and SAS version 9.1. All reported p-values are 2-sided using a level of significance of 0.05.  
12  
13

### 14 15 16 **Sample size**

17  
18 A multivariate approach power calculation was made: The summed squared correlations ( $\Sigma\rho^2$ ) to  
19  
20 the risk of the antibiotic drug investigated, was set to 0.3. The frequency of the endpoint in the  
21  
22 'standard exposure' group was set to 20%, the sample size was set to 1200, and the frequency of the  
23  
24 exposure was set at 30%, which resulted in a detection limit for odds ratio of  $\geq 1.5$  (or  $\leq 0.67$ ).  
25  
26  
27  
28  
29

## 30 **Results**

### 31 32 **Baseline characteristics**

33  
34 Nine sites included 1200 persons between 09/01/06 and 02/06/09. Eighty-three percent of the  
35  
36 patients were assessed by the investigator to have an infection at baseline and 81% of the patients  
37  
38 suffered from chronic co-morbidity. Supplementary table 1 briefly summarizes baseline  
39  
40 characteristics. Mortality was comparable between the two groups, as reported<sup>13</sup>.  
41  
42  
43  
44  
45

### 46 **Follow-up**

47  
48 Follow-up for renal measures during the 28-day study period was made on 9,348 days in the  
49  
50 'standard-exposure' group of 10,755 days alive and admitted to hospital (86.9%) vs. 9,866 of  
51  
52 11,380 days in the 'high exposure group' (86.7%). If time after discharge from hospital (where no  
53  
54 S-creatinine values were determined) until day 28 was included, the percentage of days with  
55  
56 assessment of renal failure was 71.2% (9,348/13,130 days) vs. 73.8% (9,866/13,377 days)."  
57  
58  
59  
60

### Use of Antibiotics

The antibiotics used most while admitted to the ICU were piperacillin/tazobactam, cefuroxim, meropenem and ciprofloxacin, and there was a substantial higher use of piperacillin/tazobactam and ciprofloxacin in the ‘high exposure’ arm (supplementary table 2). Vancomycin was used to a lesser extent in both groups and aminoglycosides and colistin were used rarely in both groups.

The median length of an antibiotic course was prolonged using the ‘high exposure’-algorithm (6 days (IQR 3, 11) vs. 4 days (IQR 3, 10),  $p=0.004$ ).

### Renal failure in the originally randomized study arms

The % of days within day 1-28 with  $eGFR \leq 60$  ml/min/m<sup>2</sup> was 48% in the ‘high exposure’ arm vs. 43% in the ‘standard exposure’ arm,  $p<0.0001$ . Results in table 1 are estimated eGFR values, based on actual measured S-creatinine values; results regarding days with eGFR were comparable if using the ‘last observation carried forward’ approach (not shown). RIFLE-criterion ‘R’ occurred more often within day 1-28 in the ‘high exposure’ arm than the ‘standard exposure’ arm: 209 patients vs. 170 patients,  $p=0.02$ , as did blood urea levels exceeding 20 mmol/L: 253 (43.4%) vs. 217 (37.4%),  $p=0.04$ .

The frequency of renal failure on the last day of follow-up was comparable between the arms (table 2), underlining that the results depicted in table 1 reflect a temporary extension of duration of renal failure in the “high exposure group” and furthermore that this observation is not explained by premature discharge of renally incompetent patients in the ‘standard exposure’ arm.

### Glomerular Filtration Rate changes and exposure to certain antibiotics

Comparison of the eGFR of all patients (both study arms) for the first ten days after starting on the most frequently used betalactam antibiotics showed that the slowest recovery of renal function was

1  
2  
3 observed in patients on piperacillin/tazobactam as compared to patients on meropenem or  
4  
5 cefuroxim (figure 1). A multiple effects model investigating the eGFR regression coefficient  
6  
7 ('increase in eGFR') per day on these drugs confirmed that renal recovery was lowest in patients on  
8  
9 piperacillin/tazobactam (table 3). Of note, renal recovery seems to be low in patients exposed to  
10  
11 cefuroxim, but as displayed in fig. 1, this drug is given to patients with a relatively normal renal  
12  
13 function (leaving few possibilities for 'recovery').  
14

15  
16 For the first five days following discontinuation of these drugs, adjusting for the same variables,  
17  
18 eGFR increased at the highest rate in patients receiving piperacillin/tazobactam (table 3).  
19

20  
21 The frequency of  $eGFR < 60 \text{ ml/min/1.73 m}^2$  on day 7 (or at death or last follow-up day) in the trial  
22  
23 was  $523/1200 = 43.6\%$ . This endpoint was investigated in a forward censored ( $p < 0.1$ ) logistic  
24  
25 regression. Use of piperacillin/tazobactam and other frequently used beta-lactam drugs for at least  
26  
27 three days within these first seven days, as well as known and suspected predictors of renal failure  
28  
29 were explored in a multivariable logistic regression analysis. Five independent predictors of renal  
30  
31 failure on day 7 were identified: Age above 65 years, APACHE II score  $> 20$ , Charlson's co-  
32  
33 morbidity score  $\geq 2$ , estimated GFR at baseline and use of piperacillin/tazobactam for at least 3 days  
34  
35 within the first 7 days (table 4) Excluding all patients who died within the first seven days,  
36  
37 excluding all patients with invasive fungal infection on day 1-28, combining the betalactam  
38  
39 exposure with exposure to flour-quinolone exposure (data not shown) or 4) adding 'Alert-  
40  
41 procalcitonin' at baseline as a variable, did not alter the signal (data not shown). To validate the  
42  
43 endpoint as a predictor of mortality, a Cox regression was done;  $eGFR < 60 \text{ mL/min/1.73 m}^2$  on day  
44  
45 7 was found to be the strongest predictor of 'all cause mortality day 7-28' of all tested variables  
46  
47  
48 (Table T1, supplementary material).  
49  
50  
51

## 52 53 **Discussion**

### 54 55 **Principal findings**

56  
57  
58  
59  
60

1  
2  
3 We observed that the duration of renal failure is prolonged in critically ill patients randomized to  
4 receive high exposure to broad-spectrum antibiotics and escalated diagnostic work-up according to  
5 a biomarker-strategy, compared to patients randomized to receive standard care according to  
6 guidelines regarding use of antibiotics and diagnostics. This difference in renal function was mainly  
7 confined to a prolongation of existing renal dysfunction, since there was only a moderate, although  
8 significant, difference in de novo acute renal failure.  
9

10  
11 To our knowledge, this study provides the first clinical report to inform this critical issue within  
12 ICU medicine. Firstly, the study was a randomized, good clinical practice controlled trial with a  
13 high sample size for comparison of organ failure, and the patients' baseline characteristics in  
14 general and specifically regarding renal parameters, were comparable. Secondly, the rate of follow-  
15 up, although not complete for the entire period, was high and equal among the groups and the rate  
16 of renal failure on the last day of follow-up in the two groups was comparable. Thus, the observed  
17 increased risk of persistent renal failure in the "high-exposure group" is attributable to this  
18 intervention in some way.  
19

20  
21 The intervention consisted of an increased number of culture samples, a proposed initiative to do  
22 further diagnostic imaging (no observed difference) and a rapid and aggressive antibiotic escalation  
23 with certain drugs, which was documented to be of substantial extent (supplementary table 2). As a  
24 moderate increase in microbiologic sampling would not cause renal failure, and since there was no  
25 observed increase in diagnostic imaging, these interventions seems implausible reasons to explain  
26 the observations depicted in table 1.  
27

28  
29 This leaves us with the documented escalation in use of piperacillin/tazobactam and ciprofloxacin  
30 as possible explanations. Before concluding, that the observed renal dysfunction was caused  
31 directly by one (or both) of these drugs, we wanted to exclude the possibility that the results had  
32 appeared because of a derived effect of an increase in fungal infections. Fungal infections have been  
33 linked to broad-spectrum antibiotics<sup>16</sup>, and renal failure is a well-known complication to some  
34  
35  
36  
37  
38  
39  
40  
41  
42  
43  
44  
45  
46  
47  
48  
49  
50  
51  
52  
53  
54  
55  
56  
57  
58  
59  
60

1  
2  
3 antifungals<sup>17</sup>. However, excluding all patients with invasive fungal infections did not alter the  
4  
5 results.

6  
7 Based on these results, and after having excluded other potential explanations, we realized  
8  
9 that nephrotoxicity from piperacillin/tazobactam and/or ciprofloxacin was the most plausible  
10  
11 explanation of the observed renal dysfunction. To further substantiate this, several analyses were  
12  
13 conducted. A multiple effects model was built to examine the GFR in the days after administration  
14  
15 of different frequently used drugs. This model included the five most often administered antibiotics,  
16  
17 including piperacillin/tazobactam, meropenem, cefuroxim, ciprofloxacin and vancomycin along  
18  
19 with other known and suspected causes of renal failure. In this model, the use of  
20  
21 piperacillin/tazobactam was associated with a striking low rate of GFR-improvement, compared to  
22  
23 the other drugs investigated. Intriguingly, this adverse effect appears to be reversible, since patients  
24  
25 in whom, piperacillin/tazobactam was discontinued, had the fastest improvement in renal function  
26  
27 as compared with patients on other antibiotic courses. Several sensitivity analyses were performed  
28  
29 with findings consistent with this observation.  
30  
31  
32  
33  
34  
35

### 36 **Comparison with other studies**

37  
38 Although clinical evidence regarding renal failure according to use of piperacillin/tazobactam in  
39  
40 ICU patients has been limited, the influence of piperacillin on renal function has been investigated  
41  
42 in healthy volunteers in laboratory experiments. In a cross-over experiment, the influence on drug  
43  
44 clearance from concurrent administration of piperacillin and flucloxacillin was estimated<sup>18</sup>. The  
45  
46 authors observed that flucloxacillin clearance was reduced to 45% [90% CI: 40 – 50%] when  
47  
48 piperacillin was administered simultaneously, whereas piperacillin clearance was unaffected by  
49  
50 concurrent flucloxacillin administration. Time-clearance slope modeling identified competitive  
51  
52 inhibition of renal tubular secretion as the most likely explanation. Piperacillin-induced reduction of  
53  
54 imipenem clearance<sup>19</sup> and of tazobactam clearance has also been found<sup>20</sup>, and a high correlation  
55  
56  
57  
58  
59  
60

1  
2  
3 between creatinin clearance and piperacillin clearance has been documented<sup>21</sup>, and thus, it is  
4  
5 plausible that piperacillin specifically causes nephrotoxicity.  
6

7  
8 Additionally, the published randomized trials comparing piperacillin/tazobactam with other beta-  
9  
10 lactam drugs in intensive care unit settings are scarce, underpowered for assessment of renal failure  
11  
12 endpoints and do generally not address renal endpoints<sup>5-7</sup>. Trials from other settings: haematological  
13  
14 patients, diabetes patients, and surgical settings do generally not investigate renal failure endpoints,  
15  
16 and in the few (non-ICU) trials that do report kidney endpoints, the total frequency of these makes  
17  
18 the power to avoid type II error very low (diagram D2, online supplement).  
19

### 20 21 22 23 **Strengths and weaknesses of the study**

24  
25 Although our study is performed on analyses from a large randomized good clinical practice  
26  
27 controlled trial with a stringent methodology and a high level of follow-up, there are limitations that  
28  
29 deserve mentioning: First, follow-up for organ-related measures was not complete, although we  
30  
31 followed patients for all blood samples done in 1) the hospital, at which they were initially  
32  
33 recruited, 2) other hospitals in Denmark, where we had electronic access to blood samples.  
34  
35

36  
37 However, patients who continued to suffer from renal failure when discharged from hospital, were  
38  
39 out of reach for follow-up for their renal function. Of note, the fraction of patients with remaining  
40  
41 renal failure at time of discharge was comparable between the two groups (table 2), and hence it is  
42  
43 unlikely that this lack of ability to ascertain renal outcome contributed to our main findings.  
44  
45

46  
47 Second, eGFR may not be an accurate measure of creatinine clearance, as recently documented by  
48  
49 Martin et al.<sup>22</sup>. However, even though this measure is not accurate to describe the creatinine  
50  
51 clearance, changes in eGFR reflect changes in renal function, as validated, and is closely correlated  
52  
53 to outcome<sup>23</sup>. Additionally, since hydration can be a source of error, we used the baseline weight in  
54  
55  
56  
57  
58  
59  
60

1  
2  
3 the eGFR equation. Additionally, we found that  $eGFR < 60 \text{ ml/min/1.73 m}^2$  on day 7 is a strong  
4  
5 independent predictor of mortality.  
6

7  
8 Third, the RIFLE criteria used as secondary endpoint measures are not suitable to detect renal  
9  
10 failure from baseline and forth, since the reference is defined as the pre-morbid creatinine. Hence,  
11  
12 renal failure caused by exposure to antibiotics beginning at baseline, will not necessarily be  
13  
14 captured using these criteria. This was the reason for not using these as primary endpoints.  
15

16  
17 Forth, the study was a post hoc analysis using a previously published trial as material. We have  
18  
19 tried to compensate for this by writing a detailed analysis-plan based on the hypotheses, we wanted  
20  
21 to test, before analysis. Fifth, although the sample size was relatively large compared to most other  
22  
23 randomized trials in this setting, the sample size for these secondary analyses were based on the  
24  
25 assumption of 25% renal failure in the 'standard exposure group' and a relative risk of 1.25 in the  
26  
27 'high exposure group'. The observed numbers were 21% and 1.22 which calls for a slightly higher  
28  
29 sample size. However, the sample size needed to show the differences observed in the multivariable  
30  
31 analyses was far smaller, and since these analyses confirmed the main findings, we do not think the  
32  
33 results are due to chance.  
34  
35

36  
37 In this trial, for the first time ever to our knowledge, random allocation to high exposure to broad-  
38  
39 spectrum antibiotics in the intensive care unit has been systematically applied according to a  
40  
41 systematic algorithm and this resulted in prolongation of renal failure. The results were confirmed  
42  
43 when excluding patients with fungal infections, and a multiple effects model revealed a particularly  
44  
45 low renal recovery in patients while piperacillin/tazobactam was administered and a remarkable  
46  
47 recovery when discontinuing this drug; a finding that was specific for this drug. Several other crude  
48  
49 and adjusted models likewise confirmed the findings. Finally, the results from this trial are  
50  
51 supported by human experimental studies.  
52  
53  
54  
55

## 56 **Conclusion**

57  
58  
59  
60



1  
2  
3 In conclusion, the use of piperacillin/tazobactam caused a delayed renal recovery in critically ill  
4 patients, and renal function improved after discontinuation of the drug. However, the study is not  
5 designed to investigate *de novo* emergence of renal failure, since the lowest renal function is at  
6 baseline in most patients. The study was not designed to establish whether the use of  
7 piperacillin/tazobactam or other of the interventional drugs, in some cases cause persistent renal  
8 failure, and thus, further research to explore this is warranted. We think this impact on renal  
9 function is more likely caused by a – at least partially reversible - toxic effect on the renal tubule  
10 than by a lack of effect towards the infection, since this drug is independently associated with a high  
11 chance of survival in other infected populations<sup>8</sup>, and we must emphasize that our findings are  
12 strictly confined to critically ill patients.  
13  
14  
15  
16  
17  
18  
19  
20  
21  
22  
23  
24  
25  
26

### 27 **Contributors**

28  
29 JUJ designed the study, made the data collection tools, monitored data collection for the whole trial,  
30 wrote the statistical analysis plan, and drafted and the paper. He is guarantor. JUJ, ZF and JK  
31 cleaned and analysed the data. JL, BL, LH, MHB, TM, MHA, KJT, JL, MS, HT, PS-J, AØL, DGS,  
32 NR, KT, PCF, KML, NED, MEJ, LR, CØ, ZF, JK and JG made input study design, data collection  
33 tools and analysis plan and on the manuscript. JUJ implemented the trial at the centers. All  
34 members of the Procalcitonin And Survival Study (PASS) Group assisted in designing the trial.  
35  
36 The members of the PASS study group are as follows: Central Coordinating Centre - J.U. Jensen,  
37 B. Lundgren, J. Grarup, M.L. Jakobsen, S. S. Reilev, M. Kofoed-Djursner, J. D. Lundgren;  
38 Regional Coordinating Centres - Hvidovre - J. Løken, M. Steensen; Gentofte - T. Mohr, K.  
39 Thornberg, K. Thormar; Hillerød - L.Hein, M. Bestle; Glostrup - D. Strange, A.Ø. Lauritsen;  
40 Herlev - H. Tousi, P. Søre-Jensen; Roskilde - N. Reiter, N.E. Drenck; Skejby - M.H. Andersen, P.  
41 Fjeldborg; Århus - K.M. Larsen; Data Management & Statistical Centre - Z. Fox, J. Kjør, D.  
42 Kristensen; Procalcitonin Analysis & Logistics Centre - J.U.Jensen, B. Lundgren, M. B.  
43  
44  
45  
46  
47  
48  
49  
50  
51  
52  
53  
54  
55  
56  
57  
58  
59  
60

1  
2  
3 Rasmussen, C. S.v.Hallas, M. Zacho, J. Iversen, T. Leerbeck, M. Jeppesen, K.S. Hansen, K.B.  
4  
5 Jensen; Data and Safety Monitoring Board - H. Masur (Chair), J. Chastre, H. Schönheyder, C.  
6  
7 Pedersen; Clinical Microbiology Management – B. Lundgren, J. D. Knudsen, A. Friis-Møller, K.  
8  
9 Schönning, A. Lester, H. Westh, G. Lisby, J.K. Møller, B. Bruun, J.J. Christensen, C. Østergaard,  
10  
11 M. Arpi, K. Astvad, M.D. Bartels, J. Engberg, H. Fjeldsøe-Nielsen, U.S. Jensen; PASS Site Clinical  
12  
13 Investigators (numbers of recruited persons are in parentheses) - Glostrup (290) – L. Hein, T.  
14  
15 Mohr, D. G. Strange, P. L. Petersen, A. Ø. Lauritsen, S. Hougaard, T. Mantoni, L. Nebrich, A.  
16  
17 Bendtsen, L.H. Andersen, F. Bærentzen, Andreas Eversbusch, B. Bømler, R. Martusevicius, T.  
18  
19 Nielsen. P.M. Bådstøløkken, C. Maschmann, U. Grevstad, P. Hallas, A. Lindhardt, T. Galle, K.  
20  
21 Graeser, E. Hohwu-Christensen, P. Gregersen, H.C. Boesen, L.M. Pedersen, K. Thiesen, L.C.  
22  
23 Hallengreen, I. Rye, J. Cordtz, K.R. Madsen, P.R.C. Kirkegaard, L. Findsen, L.H. Nielsen, D.H.  
24  
25 Pedersen, J.H. Andersen, C. Albrechtsen, A. Jacobsen, T. Jansen, A.G. Jensen, H.H. Jørgensen, M.  
26  
27 Vazin; Gentofte (209) – L. Lipsius, K. Thornberg, J. Nielsen, K. Thormar, M. Skielboe, B. Thage,  
28  
29 C. Thoft, M. Uldbjerg, E. Anderlo, M. Engsig, F. Hani, R.B. Jacobsen. L. Mulla, U. Skram; Herlev  
30  
31 (154) – H. Tousi, P. Søe-Jensen, T. Waldau, T. Faber, B. Andersen, I. Gillesberg, A. Christensen,  
32  
33 C. Hartmann, R. Albret, D.S. Dinesen, K. Gani, M. Ibsen; Hvidovre (148) – J. Løken, M. Steensen,  
34  
35 J.A. Petersen, P. Carl, E. Gade, D. Solevad, C. Heiring, M. Jørgensen, K. Ekelund, A. Afshari, N.  
36  
37 Hammer, M. Bitsch, J.S. Hansen, C. Wamberg, T.D. Clausen, R. Winkel, J. Huusom, D.L. Buck, U.  
38  
39 Grevstad, E. Aasvang, K. Lenz, P. Mellado, H. Karacan, J. Hidestål, J. Høgagard, J. Højbjerg, J.  
40  
41 Højlund, M. Johansen, S. Strande; Hillerød (138) – M. Bestle, S. Hestad, M. Østergaard, N.  
42  
43 Wesche, S.A. Nielsen, H. Christensen, H. Blom, C.H. Jensen K. Nielsen, N.G. Holler, K.A.  
44  
45 Jeppesen; Århus-Skejby (94) – M.H. Andersen, P. Fjeldborg, A. Vestergaard, O. Viborg, C.D.  
46  
47 Rossau; Roskilde (90) – N. Reiter, M. Glæmose, M.B.Wranér, C.B. Thomsen, B. Rasmussen, C.  
48  
49 Lund-Rasmussen, B. Bech, K. Bjerregaard, L. Spliid, L.L.W. Nielsen, N.E. Drenck; Århus-Centre  
50  
51  
52  
53  
54  
55  
56  
57  
58  
59  
60

1  
2  
3 (63) – K.M. Larsen, M. Goldinger, D. Illum, C. Jessen, A. Christiansen, A. Berg, T. Elkmann,  
4  
5 J.A.K. Pedersen, M. Simonsen; Bispebjerg (14) H. Joensen, H. Alstrøm, C. Svane, A. Engquist.  
6  
7 Supported by grants from the Danish Research Council, The Lundbeck Foundation, Research  
8  
9 Foundation for the Capital Region of Denmark, The Toyota Foundation, Brahms diagnostica (un-  
10  
11 restricted grant), The Harboe Foundation, The A.P. Møller Foundation and the Idella Foundation.  
12  
13 None of these had any influence on the design or conduct of the study; collection, management,  
14  
15 analysis, and interpretation of the data; nor the preparation, or approval of the manuscript. All  
16  
17 authors had full access to all of the data in the study and conjointly take responsibility for the  
18  
19 integrity of the data and the accuracy of the data analysis.  
20  
21

### 22 23 **Funding**

24  
25 Supported by grants from the Danish Research Council, The Lundbeck Foundation, Research  
26  
27 Foundation for the Capital Region of Denmark, The Toyota Foundation, Brahms diagnostica (un-  
28  
29 restricted grant), The Harboe Foundation, The A.P. Møller Foundation and the Idella Foundation.  
30  
31 None of these had any influence on the design or conduct of the study; collection, management,  
32  
33 analysis, and interpretation of the data; nor the preparation, or approval of the manuscript.  
34  
35

### 36 37 **Competing interests**

38  
39 All authors have completed the Unified Competing Interest form at  
40  
41 [www.icmje.org/coi\\_disclosure.pdf](http://www.icmje.org/coi_disclosure.pdf) (available on request from the corresponding author) and declare  
42  
43 that the trial was funded mainly by the Danish State (Danish Research Council) and : all authors  
44  
45 state that they have no relationships with companies that might have an interest in the submitted  
46  
47 work in the previous 3 years; their spouses, partners, or children have no financial relationships that  
48  
49 may be relevant to the submitted work; and all authors have no non-financial interests that may be  
50  
51 relevant to the submitted work.  
52

### 53 54 **Ethical approval**

55  
56  
57  
58  
59  
60

The study was approved by the ethics committee for Copenhagen and Frederiksberg community (now Ethics Committee for the Capitol Region): H-KF-01-272-753. Patient consent: We received written consent from the patient or the next of kin for trial inclusion.

### Data sharing

No additional data available.

### References

1. Levy MM, Macias WL, Vincent JL, et al. Early changes in organ function predict eventual survival in severe sepsis. *Crit Care Med*. 2005; **33**(10): 2194-201.
2. Jia X, Malhotra A, Saeed M, et al. Risk factors for ARDS in patients receiving mechanical ventilation for > 48 h. *Chest*. 2008; **133**(4): 853-61.
3. Rubenfeld GD, Caldwell E, Peabody E, et al. Incidence and outcomes of acute lung injury. *N Engl J Med*. 2005; **353**(16): 1685-93.
4. Kane-Gill SL, Jacobi J, Rothschild JM. Adverse drug events in intensive care units: risk factors, impact, and the role of team care. *Crit Care Med*. 2010; **38**(6 Suppl): S83-9.
5. Brun-Buisson C, Sollet JP, Schweich H, et al. Treatment of ventilator-associated pneumonia with piperacillin-tazobactam/amikacin versus ceftazidime/amikacin: a multicenter, randomized controlled trial. VAP Study Group. *Clin Infect Dis*. 1998; **26**(2): 346-54.
6. Alvarez-Lerma F, Insausti-Ordenana J, Jorda-Marcos R, et al. Efficacy and tolerability of piperacillin/tazobactam versus ceftazidime in association with amikacin for treating nosocomial pneumonia in intensive care patients: a prospective randomized multicenter trial. *Intensive Care Med*. 2001; **27**(3): 493-502.
7. Marra F, Reynolds R, Stiver G, et al. Piperacillin/tazobactam versus imipenem: a double-blind, randomized formulary feasibility study at a major teaching hospital. *Diagn Microbiol Infect Dis*. 1998; **31**(2): 355-68.
8. Paul M, Yahav D, Bivas A, et al. Anti-pseudomonal beta-lactams for the initial, empirical, treatment of febrile neutropenia: comparison of beta-lactams. *Cochrane Database Syst Rev*. 2010; **11**: CD005197.
9. Reich G, Cornely OA, Sandherr M, et al. Empirical antimicrobial monotherapy in patients after high-dose chemotherapy and autologous stem cell transplantation: a randomised, multicentre trial. *Br J Haematol*. 2005; **130**(2): 265-70.
10. Gomez L, Estrada C, Gomez I, et al. Low-dose beta-lactam plus amikacin in febrile neutropenia: cefepime vs. piperacillin/tazobactam, a randomized trial. *Eur J Clin Microbiol Infect Dis*. 2010; **29**(4): 417-27.
11. Sato T, Kobayashi R, Yasuda K, et al. A prospective, randomized study comparing cefozopran with piperacillin-tazobactam plus ceftazidime as empirical therapy for febrile neutropenia in children with hematological disorders. *Pediatr Blood Cancer*. 2008; **51**(6): 774-7.
12. Bow EJ, Rotstein C, Noskin GA, et al. A randomized, open-label, multicenter comparative study of the efficacy and safety of piperacillin-tazobactam and cefepime for the empirical treatment of febrile neutropenic episodes in patients with hematologic malignancies. *Clin Infect Dis*. 2006; **43**(4): 447-59.

13. Jensen JU, Hein L, Lundgren B, et al. Procalcitonin-guided interventions against infections to increase early appropriate antibiotics and improve survival in the intensive care unit: A randomized trial. *Crit Care Med*. 2011.
14. Dellinger RP, Levy MM, Carlet JM, et al. Surviving Sepsis Campaign: international guidelines for management of severe sepsis and septic shock: 2008. *Crit Care Med*. 2008; **36**(1): 296-327.
15. Levy MM, Fink MP, Marshall JC, et al. 2001 SCCM/ESICM/ACCP/ATS/SIS International Sepsis Definitions Conference. *Crit Care Med*. 2003; **31**(4): 1250-6.
16. Hebert C, Villaran R, Tolentino J, et al. Prior antimicrobial exposure and the risk for bloodstream infection with fluconazole-non-susceptible *Candida* strains. *Scand J Infect Dis*. 2010; **42**(6-7): 506-9.
17. Sorkine P, Nagar H, Weinbroum A, et al. Administration of amphotericin B in lipid emulsion decreases nephrotoxicity: results of a prospective, randomized, controlled study in critically ill patients. *Crit Care Med*. 1996; **24**(8): 1311-5.
18. Landersdorfer CB, Kirkpatrick CM, Kinzig M, et al. Inhibition of flucloxacillin tubular renal secretion by piperacillin. *Br J Clin Pharmacol*. 2008; **66**(5): 648-59.
19. Saitoh H, Oda M, Gytoku T, et al. A beneficial interaction between imipenem and piperacillin possibly through their renal excretory process. *Biol Pharm Bull*. 2006; **29**(12): 2519-22.
20. Komuro M, Maeda T, Kakuo H, et al. Inhibition of the renal excretion of tazobactam by piperacillin. *J Antimicrob Chemother*. 1994; **34**(4): 555-64.
21. Aronoff GR, Sloan RS, Brier ME, et al. The effect of piperacillin dose on elimination kinetics in renal impairment. *Eur J Clin Pharmacol*. 1983; **24**(4): 543-7.
22. Martin JH, Fay MF, Udy A, et al. Pitfalls of using estimations of glomerular filtration rate in an intensive care population. *Intern Med J*. 2011.
23. Bagshaw SM, George C, Dinu I, et al. A multi-centre evaluation of the RIFLE criteria for early acute kidney injury in critically ill patients. *Nephrol Dial Transplant*. 2008; **23**(4): 1203-10.

**Table 1: Prevalence and duration of kidney organ failure ('Standard exposure' group vs. 'High exposure' group)**

|                                                                                        | 'Standard exposure' group<br>(N=596) | 'High exposure' group<br>(N=604) | p-value |
|----------------------------------------------------------------------------------------|--------------------------------------|----------------------------------|---------|
| <b>EstimatedGFR*:</b>                                                                  |                                      |                                  |         |
| N. days (% of days from day 1 to 28 with values):                                      |                                      |                                  |         |
| Moderately-severely impaired: (eGFR: $\leq 60$ mL/min/1.73 m <sup>2</sup> )            | 3016 (43.4%)                         | 3672 (48.1%)                     | <0.0001 |
| Severely impaired: (eGFR $\leq 30$ mL/min/1.73 m <sup>2</sup> )                        | 1445 (20.8%)                         | 1910 (25.0%)                     | <0.0001 |
| Severely impaired: (eGFR $\leq 30$ mL/min/1.73 m <sup>2</sup> ), days from day 1 to 14 | 984 (20.0%)                          | 1253 (23.5%)                     | <0.0001 |
| <b>'RIFLE' criteria, N patients (%) within day 1 to 28</b>                             |                                      |                                  |         |
| 'R' reached                                                                            | 170 (28.5%)                          | 209 (34.6%)                      | 0.02    |
| 'I' reached                                                                            | 75 (12.6%)                           | 92 (15.2%)                       | 0.19    |
| 'F' reached                                                                            | 121 (20.3%)                          | 150 (24.8%)                      | 0.06    |
| 'R' or death                                                                           | 298 (50.0%)                          | 327 (54.1%)                      | 0.15    |
| 'I' or death                                                                           | 234 (39.3%)                          | 252 (41.7%)                      | 0.39    |
| 'F' or death                                                                           | 270 (45.3%)                          | 287 (47.5%)                      | 0.44    |
| <b>Urea</b>                                                                            |                                      |                                  |         |
| Patients with a urea level ever $\geq 20$ mmol/L (day 1-28); N (%)                     | 217 (37.4%)                          | 253 (43.4%)                      | 0.04    |

\*eGFR was assessed using the Cockcroft and Gault method [Ref: Cockcroft DW, Gault MH.: Prediction of creatinine clearance from serum creatinine. Nephron 1976;16:31-41]. Actual measured creatinin values were used. If using the 'last observation carried forward' approach regarding creatinin measurement to take into account that patients who died in renal failure should be counted as such, did not change the signal or the statistics of these analyses. 'R':Risk, 'I': Injury, 'F': Failure. Presence of renal failure according to 'RIFLE' was assessed using the guidelines developed by the acute dialysis quality initiative ([www.adqi.net](http://www.adqi.net))

**Table 2: Prevalence of kidney organ failure on the last day of follow-up ('Standard exposure' group vs. 'High exposure' group)**

|                                                                                       | 'Standard exposure' group | 'High exposure' group | p-value |
|---------------------------------------------------------------------------------------|---------------------------|-----------------------|---------|
| <b>Survivors and patients who had last creatinine measured &gt;24 h before death:</b> | <b>(N=432)</b>            | <b>(N=438)</b>        |         |
| Renal failure (eGFR: $\leq 60$ mL/min/1.73 m <sup>2</sup> )                           | 119 (27.6%)               | 137 (31.3%)           | 0.23    |
| <b>Patients who died (with last creatinine measured within 24 h before death):</b>    | <b>(N=150)</b>            | <b>(N=145)</b>        |         |
| Renal failure (eGFR: $\leq 60$ mL/min/1.73 m <sup>2</sup> )                           | 105 (70.0%)               | 99 (68.3%)            | 0.83    |
| <b>All patients with creatinine measurements</b>                                      | <b>(N=582)</b>            | <b>(N=583)</b>        |         |
| Renal failure (eGFR: $\leq 60$ mL/min/1.73 m <sup>2</sup> )                           | 224 (38.5)                | 236 (40.5)            | 0.51    |

\*eGFR was assessed using the Cockcroft and Gault method [Ref: Cockcroft DW, Gault MH.: Prediction of creatinine clearance from serum creatinine. Nephron 1976;16:31-41]. Actual measured creatinin values were used.

1  
2  
3  
4  
5  
6  
7  
8  
9  
10  
11  
12  
13  
14  
15  
16  
17  
18  
19  
20  
21  
22  
23  
24  
25  
26  
27  
28  
29  
30  
31  
32  
33  
34  
35  
36  
37  
38  
39  
40  
41  
42  
43  
44  
45  
46  
47  
48  
49  
50  
51  
52  
53  
54  
55  
56  
57  
58  
59  
60

For peer review only



For peer review only

1  
2  
3  
4  
5  
6  
7  
8  
9  
10  
11  
12  
13  
14  
15  
16  
17  
18  
19  
20  
21  
22  
23  
24  
25  
26  
27  
28  
29  
30  
31  
32  
33  
34  
35  
36  
37  
38  
39  
40  
41  
42  
43  
44  
45  
46  
47  
48  
49

**Table 3. Multiple effects models investigating estimated GFR changes after starting and stopping beta-lactam antibiotics**

| Variable                       | Unadjusted analysis                            |                    | Multivariable analysis             |                    |         |
|--------------------------------|------------------------------------------------|--------------------|------------------------------------|--------------------|---------|
|                                | Regression coefficient<br>(95% CI)             | P-value            | Regression coefficient<br>(95% CI) | P-value            |         |
| <b>After starting the drug</b> |                                                |                    |                                    |                    |         |
| Piperacillin/tazobactam        | Per day more on piperacillin/tazobactam        | 1.39 (1.17, 1.60)  | <0.0001                            | 0.99 (0.71, 1.27)  | <0.0001 |
| Meropenem                      | Per day more on meropenem                      | 2.74 (2.39, 3.09)  | <0.0001                            | 2.86 (2.45, 3.28)  | <0.0001 |
| Cefuroxim                      | Per day more on cefuroxim                      | 1.91 (1.67, 2.16)  | <0.0001                            | 1.27 (0.90, 1.64)  | <0.0001 |
| <b>After stopping the drug</b> |                                                |                    |                                    |                    |         |
| Piperacillin/tazobactam        | Per day after stopping piperacillin/tazobactam | 2.79 (2.35, 3.24)  | <0.0001                            | 2.70 (2.26, 3.14)  | <0.0001 |
| Meropenem                      | Per day after stopping meropenem               | 0.20 (-0.51, 0.91) | 0.59                               | 0.17 (-0.52, 0.86) | 0.63    |
| Cefuroxim                      | Per day after stopping cefuroxim               | 0.13 (-0.25, 0.50) | 0.51                               | 0.01 (-0.35, 0.37) | 0.96    |

All multivariable analyses were adjusted for: treatment arm ('low exposure' vs. 'high exposure'), gender, age ( $\geq 65$  vs.  $< 65$  years), APACHE II score ( $\geq 20$  vs.  $< 20$ ), Clinically judged infection (severe sepsis/septic shock vs. milder or no infection), patient category (surgical vs. medical) and eGFR level at administration of the antibiotic, (1:  $< 30$  ml/min/1.73 m<sup>2</sup>, 2: 31-60 ml/min/1.73 m<sup>2</sup>, 3:  $> 60$  ml/min/1.73 m<sup>2</sup>).

**Table 4. Multivariable logistic regression: beta-lactam antibiotics and other risk variables vs. binary endpoint eGFR<60 ml/min/1.73m<sup>2</sup> on day 7.**

| Variable                                              | Unadjusted analysis    |         | Multivariable analysis |         |
|-------------------------------------------------------|------------------------|---------|------------------------|---------|
|                                                       | Odds ratio<br>(95% CI) | P-value | Odds ratio<br>(95% CI) | P-value |
| <b>Other variables</b>                                |                        |         |                        |         |
| Age (≥65 vs. <65 years)                               | 2.36 (1.86, 3.00)      | <0.0001 | 1.85 (1.31, 2.60)      | <0.0001 |
| APACHE II score (≥20 vs. <20)                         | 2.49 (1.90, 3.25)      | <0.0001 | 1.64 (1.12, 2.41)      | 0.01    |
| Severe sepsis/septic shock vs. milder or no infection | 2.02 (1.59, 2.56)      | <0.0001 | 1.16 (0.82, 1.66)      | 0.40    |
| Auto-immune disease (Y vs. N)                         | 1.31 (0.73, 2.33)      | 0.36    | NI                     | -       |
| Cancer (Y vs. N)                                      | 1.26 (0.88, 1.79)      | 0.21    | NI                     | -       |
| Charlson score (≥2 vs. <2)                            | 1.72 (1.35, 2.18)      | <0.0001 | 1.70 (1.21, 2.40)      | 0.002   |
| Surgical (Y vs. N)                                    | 1.16 (0.90, 1.50)      | 0.24    | NI                     | -       |
| Body Mass Index (≥25 vs. <25)                         | 1.57 (1.17, 2.12)      | 0.003   | 1.19 (0.78, 1.82)      | 0.41    |
| Gender (Male vs. Female)                              | 1.25 (0.99, 1.57)      | 0.06    | 1.28 (0.92, 1.78)      | 0.14    |
| eGFR level at baseline                                |                        |         |                        |         |
| >60 ml/min/1,73 m <sup>2</sup>                        | Ref                    | -       | Ref                    | -       |
| 31-60 ml/min/1,73 m <sup>2</sup>                      | 14.6 (10.2, 21.0)      | <0.0001 | 11.7 (8.0, 17.0)       | <0.0001 |
| <30 ml/min/1,73 m <sup>2</sup>                        | 81.1 (51.2, 128.5)     | <0.0001 | 65.9 (40.7, 106.6)     | <0.0001 |
| <b>Beta-lactam antibiotics</b>                        |                        |         |                        |         |
| Piperacillin/tazobactam (≥3 vs. <3 days)*             | 2.32 (1.82, 2.96)      | <0.0001 | 1.70 (1.18, 2.43)      | 0.004   |
| Meropenem (≥3 vs. <3 days)*                           | 0.99 (0.71, 1.37)      | 0.94    | NI                     | -       |
| Cefuroxim (≥3 vs. <3 days)*                           | 0.73 (0.57, 0.94)      | 0.01    | 1.24 (0.85, 1.80)      | 0.26    |

All variables entered in the multivariable analysis were adjusted for the other variables in this model. \*All beta-lactam drug exposures are (≥3 vs. <3 days within the first 7 days in the study). All variables with a p-value <0.2 were included in the multivariable model. NI: Not Included.

1  
2  
3  
4  
5  
6  
7  
8  
9  
10  
11  
12  
13  
14  
15  
16  
17  
18  
19  
20  
21  
22  
23  
24  
25  
26  
27  
28  
29  
30  
31  
32  
33  
34  
35  
36  
37  
38  
39  
40  
41  
42  
43  
44  
45  
46  
47  
48  
49

For peer review only

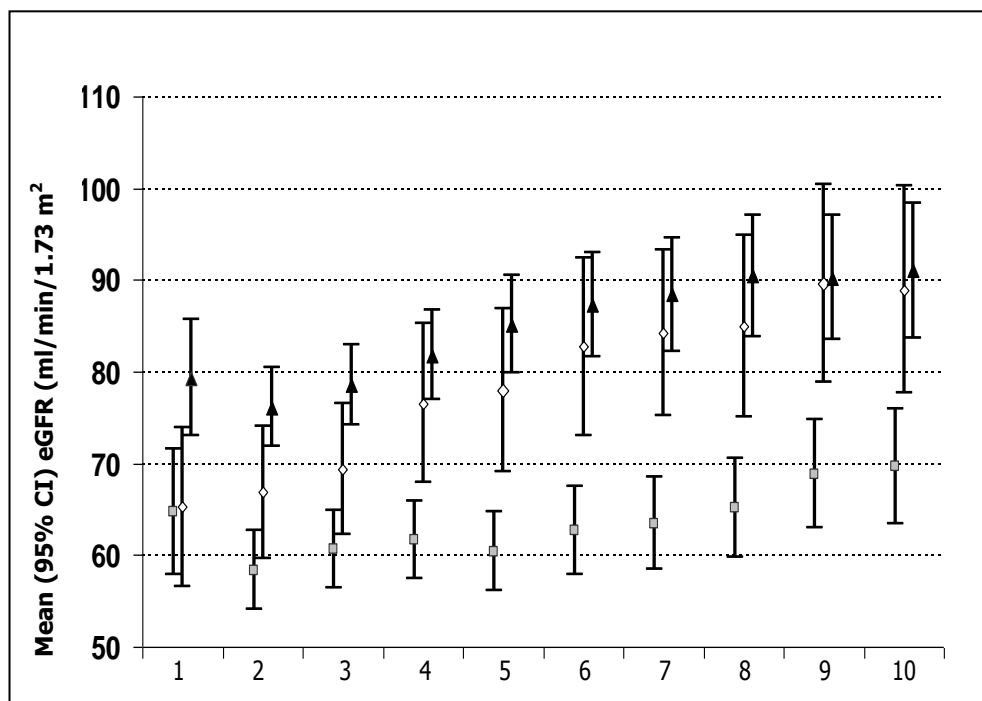

Figure 1. eGFR during ten days on cefuroxim, piperacillin/tazobactam and meropenem. ▲=cefuroxim; ■=piperacillin/tazobactam; ◇=meropenem.

Differences between eGFR in patients receiving piperacillin/tazobactam vs. meropenem: day 1 ( $p=0.78$ ), day 2 ( $p=0.18$ ), day 3 ( $p=0.09$ ), day 4 ( $p=0.008$ ), day 5 ( $p=0.001$ ), day 6 ( $p=0.001$ ), day 7 ( $p=0.0004$ ), day 8 ( $p=0.005$ ), day 9 ( $p=0.006$ ), day 10 ( $p=0.02$ ).

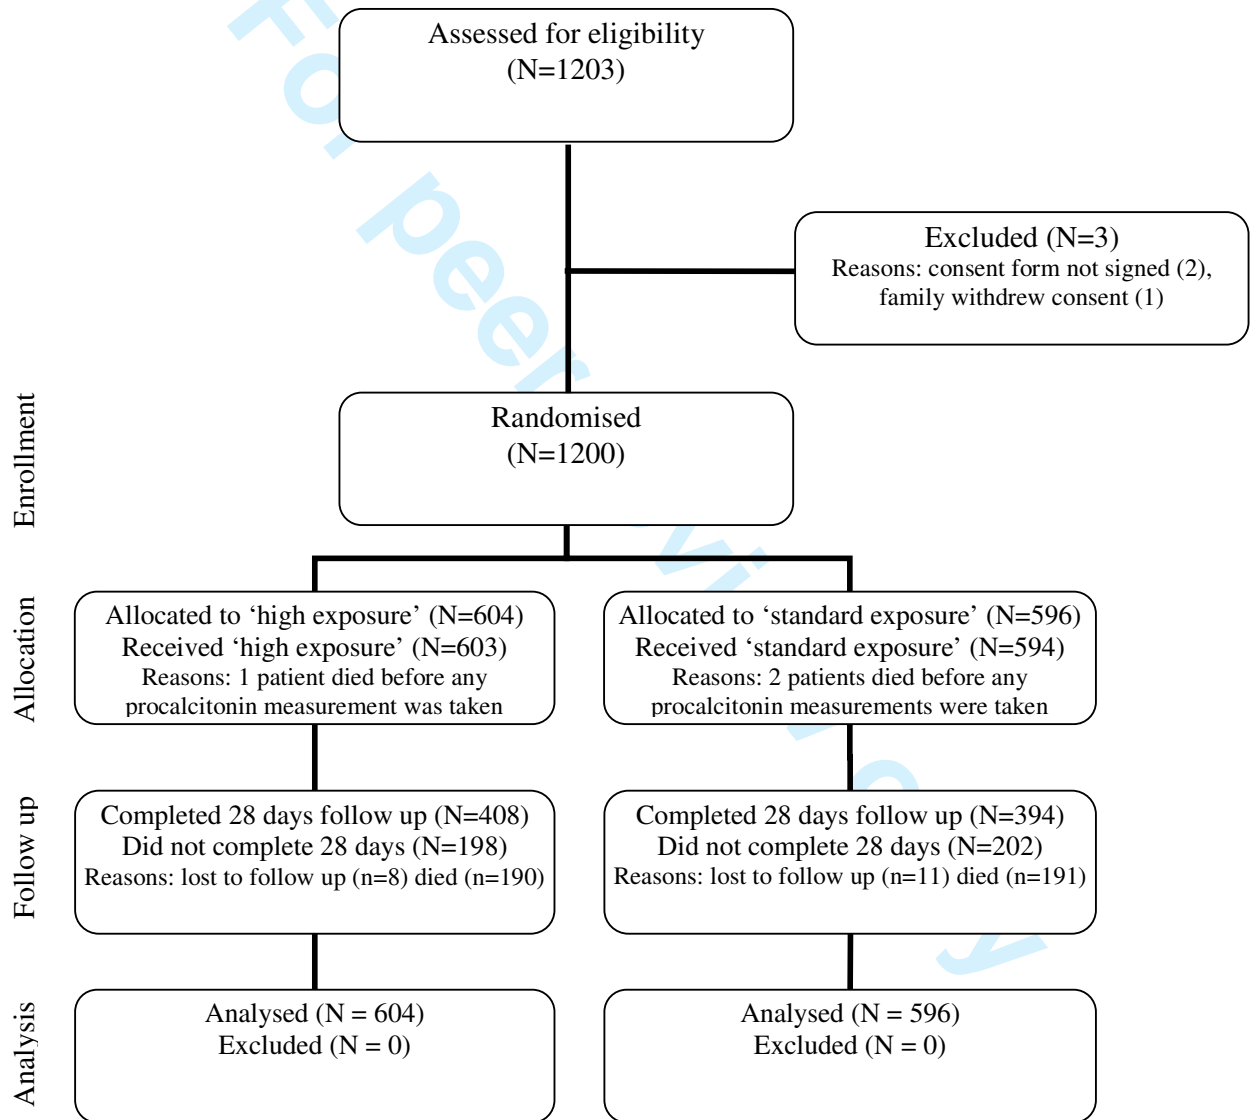

Supplementary Figure 1. Patient Flow Diagram of the trial



1  
2  
3  
4 Supplementary Figure 1. General principles of procalcitonin-guided intervention.  
5

6 At 'alert-procalcitonin' situation ( $\geq 1.0$  ng/ml and not decreasing by at least 10% from the previous day),  
7 interventions were obligatorily conducted according to an algorithm with specific instructions for  
8 intervention, which was adapted to the antimicrobial guidelines on the site. Antimicrobials were daily  
9 adjusted according to 1) present and previous procalcitonin values, 2) infectious state of the patient (clinical  
10 presentation, microbiology, radiology etc.) and 3) history of antimicrobial use. Procalcitonin-guided  
11 antimicrobial escalation was mandatory, except when 1) there was a clear contra-indication for administering  
12 it or 2) microbiology "explaining the infectious presentation of the patient" was announced (same date)  
13 leading to specific therapy. Standard-of-Care antimicrobial diagnostics and treatment was not waived in the  
14 'high exposure arm (nor the 'standard exposure' arm) to assure patient safety. According to the standard-of-  
15 care principle, all patients with septic shock were treated at the onset of hypotension with antimicrobials  
16 covering >95% of the causes of this condition in our hospitals. Awaiting procalcitonin results/low  
17 procalcitonin levels was not considered a plausible reason to withhold antimicrobial treatment. The treating  
18 physician was reminded daily via phone from the coordinating centre at each 'alert-procalcitonin' to  
19 intervene. In the 'standard exposure' arm, procalcitonin measurements were not available.  
20  
21  
22  
23  
24  
25  
26  
27  
28  
29  
30  
31  
32  
33  
34  
35  
36  
37  
38  
39  
40  
41  
42  
43  
44  
45  
46  
47  
48  
49  
50  
51  
52  
53  
54  
55  
56  
57  
58  
59  
60



**Supplementary Table 1. Baseline characteristics of the study participants.**

|                                                                                                                                                                                                                                                                                                                                                                                                                                                                                                                                                                                                                                                                                                                                                                                                                                                                                                                                        | 'Standard exposure'<br>group (n=596) | 'High exposure'<br>group (n=604) | Overall (n=1200)  |
|----------------------------------------------------------------------------------------------------------------------------------------------------------------------------------------------------------------------------------------------------------------------------------------------------------------------------------------------------------------------------------------------------------------------------------------------------------------------------------------------------------------------------------------------------------------------------------------------------------------------------------------------------------------------------------------------------------------------------------------------------------------------------------------------------------------------------------------------------------------------------------------------------------------------------------------|--------------------------------------|----------------------------------|-------------------|
| Age, years - median (IQR)                                                                                                                                                                                                                                                                                                                                                                                                                                                                                                                                                                                                                                                                                                                                                                                                                                                                                                              | 67 (58–75)                           | 67 (58–76)                       | 67 (58–76)        |
| Male sex – no. (%)                                                                                                                                                                                                                                                                                                                                                                                                                                                                                                                                                                                                                                                                                                                                                                                                                                                                                                                     | 333 (55.9%)                          | 330 (54.6%)                      | 663 (55.3%)       |
| Body Mass Index, kg/m <sup>2</sup> – median (IQR)                                                                                                                                                                                                                                                                                                                                                                                                                                                                                                                                                                                                                                                                                                                                                                                                                                                                                      | 24.7 (22.0–27.8)                     | 25.0 (22.5–28.7)                 | 24.8 (22.2–27.9)  |
| APACHE II Score - median (IQR)                                                                                                                                                                                                                                                                                                                                                                                                                                                                                                                                                                                                                                                                                                                                                                                                                                                                                                         | 18 (13–24)                           | 18 (13–25)                       | 18 (13–24)        |
| <b>Chronic co-morbidity* - no. (%)</b>                                                                                                                                                                                                                                                                                                                                                                                                                                                                                                                                                                                                                                                                                                                                                                                                                                                                                                 |                                      |                                  |                   |
| No chronic co-morbidities                                                                                                                                                                                                                                                                                                                                                                                                                                                                                                                                                                                                                                                                                                                                                                                                                                                                                                              | 102 (17.1)                           | 123 (20.4)                       | 225 (18.8)        |
| <b>Kidney function and electrolytes</b>                                                                                                                                                                                                                                                                                                                                                                                                                                                                                                                                                                                                                                                                                                                                                                                                                                                                                                |                                      |                                  |                   |
| Creatinin, µmol/L - median (IQR)                                                                                                                                                                                                                                                                                                                                                                                                                                                                                                                                                                                                                                                                                                                                                                                                                                                                                                       | 119 (78, 197)                        | 119 (75, 208)                    | 119 (76, 202)     |
| eGFR, mL/min/1.73m <sup>2</sup> – median (IQR)                                                                                                                                                                                                                                                                                                                                                                                                                                                                                                                                                                                                                                                                                                                                                                                                                                                                                         | 51.4 (29.2, 80.5)                    | 49.4 (25.4, 82.6)                | 50.2 (27.1, 81.5) |
| Carbamid, mmol/L - median (IQR)                                                                                                                                                                                                                                                                                                                                                                                                                                                                                                                                                                                                                                                                                                                                                                                                                                                                                                        | 10.3 (6.5, 17.0)                     | 10.6 (6.3, 18.1)                 | 10.5 (6.4, 17.4)  |
| Na <sup>+</sup> , mmol/l - median (IQR)                                                                                                                                                                                                                                                                                                                                                                                                                                                                                                                                                                                                                                                                                                                                                                                                                                                                                                | 138 (134, 141)                       | 137 (134, 141)                   | 138 (134, 141)    |
| K <sup>+</sup> , mmol/l - median (IQR)                                                                                                                                                                                                                                                                                                                                                                                                                                                                                                                                                                                                                                                                                                                                                                                                                                                                                                 | 4.0 (3.7, 4.4)                       | 4.0 (3.6, 4.5)                   | 4.0 (3.6, 4.4)    |
| pH - median (IQR)                                                                                                                                                                                                                                                                                                                                                                                                                                                                                                                                                                                                                                                                                                                                                                                                                                                                                                                      | 7.29 (7.21–7.39)                     | 7.29 (7.20–7.38)                 | 7.29 (7.20–7.38)  |
| Dialysis required, patients (%)                                                                                                                                                                                                                                                                                                                                                                                                                                                                                                                                                                                                                                                                                                                                                                                                                                                                                                        | 88 (14.8%)                           | 86 (14.2%)                       | 174 (14.5%)       |
| <b>Indicators of severity (non-renal)</b>                                                                                                                                                                                                                                                                                                                                                                                                                                                                                                                                                                                                                                                                                                                                                                                                                                                                                              |                                      |                                  |                   |
| Temperature, °C - median (IQR)                                                                                                                                                                                                                                                                                                                                                                                                                                                                                                                                                                                                                                                                                                                                                                                                                                                                                                         | 37.2 (36.4–38.0)                     | 37.3 (36.5–38.1)                 | 37.3 (36.4–38.0)  |
| Mean arterial pressure, mmHg - median (IQR)                                                                                                                                                                                                                                                                                                                                                                                                                                                                                                                                                                                                                                                                                                                                                                                                                                                                                            | 71 (60–84)                           | 72 (63–85)                       | 71 (62–84)        |
| Heart frequency - median (IQR)                                                                                                                                                                                                                                                                                                                                                                                                                                                                                                                                                                                                                                                                                                                                                                                                                                                                                                         | 100 (82–116)                         | 100 (84–117)                     | 100 (83–117)      |
| Need for vasopressor/inotropic drug† - n (%)                                                                                                                                                                                                                                                                                                                                                                                                                                                                                                                                                                                                                                                                                                                                                                                                                                                                                           | 315 (52.9)                           | 326 (53.4)                       | 641 (53.4)        |
| Mechanical ventilation used - n (%)                                                                                                                                                                                                                                                                                                                                                                                                                                                                                                                                                                                                                                                                                                                                                                                                                                                                                                    | 401 (67.3%)                          | 401 (66.4%)                      | 802 (66.8%)       |
| <b>Biomarkers</b>                                                                                                                                                                                                                                                                                                                                                                                                                                                                                                                                                                                                                                                                                                                                                                                                                                                                                                                      |                                      |                                  |                   |
| Alert-PCT § – no. (%)                                                                                                                                                                                                                                                                                                                                                                                                                                                                                                                                                                                                                                                                                                                                                                                                                                                                                                                  | 279 (47.0)                           | 312 (51.7)                       | 591 (49.4)        |
| Leukocytes, x10 <sup>9</sup> – median (IQR)                                                                                                                                                                                                                                                                                                                                                                                                                                                                                                                                                                                                                                                                                                                                                                                                                                                                                            | 13.0 (8.8–18.1)                      | 12.4 (8.0–18.1)                  | 12.8 (8.4–18.1)   |
| C-reactive protein, mg/L – median (IQR)                                                                                                                                                                                                                                                                                                                                                                                                                                                                                                                                                                                                                                                                                                                                                                                                                                                                                                | 131 (40–234)                         | 137 (40–253)                     | 135 (40–241)      |
| Interquartile range (IQR). Acute Physiology and Chronic Health Evaluation II score (APACHE II) ranges from 0 to 71. *Chronic co-morbidity: Earlier diagnosed via hospital admission: heart failure, lung disease, cancer, diabetes, alcohol abuse, chronic infection, neurological disease, renal diseases, liver disease, gastrointestinal disease, autoimmune disease, cancer and psychiatric disorders. †Vasopressors/inotropic drugs are considered to be epinephrine, nor-epinephrine, dopamine and dobutamine. ‡ Infections were rated according to the ACCP/SCCM definitions; investigators were trained in using them. §Alert-PCT: Procalcitonin-level not decreasing by at least 10% from the previous day and above 1.0 ng/ml. If only one measurement is available: Absolute procalcitonin-level above 1.0 ng/ml. A comprehensive baseline table is available in the primary publication from this material <sup>13</sup> . |                                      |                                  |                   |

**Supplementary Table 2. Consumption of antimicrobials during follow-up**

|                                                                       | Standard exposure<br>(n=596) | High exposure<br>(n=604) | p-value |
|-----------------------------------------------------------------------|------------------------------|--------------------------|---------|
| <b>Consumption of antimicrobials</b>                                  |                              |                          |         |
| Pip/tazo used within 28 days (DDD)                                    | 1893                         | 2925                     | -       |
| Proportion of days <sup>a</sup> followed where Pip/tazo was used      | 0.00 (0.00 – 0.33)           | 0.11 (0.00 – 0.56)       | <0.001  |
| Meropenem used within 28 days (DDD)                                   | 2174                         | 2480                     | -       |
| Proportion of days <sup>a</sup> followed where meropenem was used     | 0.00 (0.00 – 0.00)           | 0.00 (0.00 – 0.07)       | 0.23    |
| Cefuroxim used within 28 days (DDD)                                   | 4369                         | 3390                     | -       |
| Proportion of days <sup>a</sup> followed where cefuroxim was used     | 0.11 (0.00 – 0.39)           | 0.04 (0.00 – 0.29)       | <0.001  |
| Ciprofloxacin used within 28 days (DDD)                               | 6210                         | 8382                     | -       |
| Proportion of days <sup>a</sup> followed where ciprofloxacin was used | 0.21 (0.00 – 0.71)           | 0.33 (0.04 – 0.88)       | <0.001  |
| Number (%) ICU days spent with at least three antimicrobials          | 2721 (57.7%)                 | 3570 (65.5%)             | 0.002   |

ICU: Intensive care unit. <sup>a</sup>This comparison was made with complete follow-up for 28 days (if patients were discharged from ICU, they were followed for antimicrobial use in all hospital admissions in Denmark).

Pip/tazo: piperacillin/tazobactam. DDD: Defined Daily Dose administered within day 1-28. Parts of this table is also available in the primary publication on this material<sup>13</sup>. It is included in the present report since it is crucial for interpretation of the results.

1  
2  
3  
4  
5  
6  
7  
8  
9  
10  
11  
12  
13  
14  
15  
16  
17  
18  
19  
20  
21  
22  
23  
24  
25  
26  
27  
28  
29  
30  
31  
32  
33  
34  
35  
36  
37  
38  
39  
40  
41  
42  
43  
44  
45  
46  
47  
48  
49  
50  
51  
52  
53  
54  
55  
56  
57  
58  
59  
60

For peer review only

1  
2  
3  
4  
5  
6  
7  
8  
9  
10  
11  
12  
13  
14  
15  
16  
17  
18  
19  
20  
21  
22  
23  
24  
25  
26  
27  
28  
29  
30  
31  
32  
33  
34  
35  
36  
37  
38  
39  
40  
41  
42  
43  
44  
45  
46  
47  
48  
49

For peer review only

Supplementary table 3: Cox proportional hazards models investigating predictors of mortality after ten days

| Variable                                                                         | Unadjusted analysis      |            | Multivariable analysis   |            |
|----------------------------------------------------------------------------------|--------------------------|------------|--------------------------|------------|
|                                                                                  | Hazard ratio<br>(95% CI) | P-value    | Hazard ratio<br>(95% CI) | P-value    |
| Treatment arm ('High exposure vs. 'Standard exposure)                            | 0.97 (0.72, 1.31)        | 0.86       | 0.93 (0.69, 1.26)        | 0.63       |
| Hospital:                                                                        |                          |            |                          |            |
| 1                                                                                | Ref                      | 0.11       | Ref                      | 0.37       |
| 2                                                                                | 0.63 (0.19, 2.05)        |            | 0.50 (0.15, 1.66)        |            |
| 3                                                                                | 0.54 (0.17, 1.75)        |            | 0.49 (0.15, 1.63)        |            |
| 4                                                                                | 0.86 (0.26, 2.81)        |            | 0.65 (0.19, 2.21)        |            |
| 5                                                                                | 0.56 (0.16, 1.88)        |            | 0.45 (0.13, 1.56)        |            |
| 6                                                                                | 0.71 (0.21, 2.37)        |            | 0.63 (0.18, 2.12)        |            |
| 7                                                                                | 0.79 (0.23, 2.72)        |            | 0.66 (0.18, 2.40)        |            |
| 8                                                                                | 0.43 (0.11, 1.53)        |            | 0.34 (0.09, 1.26)        |            |
| 9                                                                                | 0.23 (0.05, 1.02)        |            | 0.27 (0.06, 1.26)        |            |
| Gender (Female vs. Male)                                                         | 0.80 (0.59, 1.08)        | 0.14       | 0.77 (0.57, 1.05)        | 0.10       |
| Age ( $\geq 65$ years vs. $< 65$ years)                                          | 1.96 (1.42, 2.69)        | $< 0.0001$ | 1.86 (1.34, 2.58)        | $< 0.0001$ |
| APACHE II score ( $\geq 20$ vs. $< 20$ )                                         | 1.77 (1.31, 2.39)        | $< 0.0001$ | 1.35 (0.98, 1.87)        | 0.07       |
| Infection at baseline (Severe Sepsis or septic shock vs Milder or no infection)  | 1.31 (0.97, 1.76)        | 0.08       | 1.17 (0.84, 1.64)        | 0.35       |
| Surgical patient (Yes vs. No)                                                    | 0.78 (0.57, 1.06)        | 0.11       | 0.76 (0.55, 1.05)        | 0.09       |
| Date recruited (01/01/08 to 02/06/09 vs. 09/01/06 to 31/12/07)                   | 1.11 (0.81, 1.53)        | 0.50       | 1.18 (0.84, 1.67)        | 0.34       |
| eGFR ever $< 30$ mL/min/1.73 m <sup>2</sup> over the first ten days (Yes vs. No) | 1.81 (1.34, 2.45)        | $< 0.0001$ | 1.47 (1.06, 2.04)        | 0.02       |

## Diagram D1 Example of the site-specific interventional algorithm, site 'Aarhus'

### The Procalcitonin And Survival Study (PASS) Intervention Algorithm, Site: Aarhus

IMPORTANT: All patients shall (at least) receive antimicrobial therapy covering "standard-of-care", i.e. if any existing guidelines or evidence for antimicrobial treatment indicate/ contra-indicate surgical and/or antibiotic treatment, then the patient should be treated according to this. Indicated treatment should never be left out because of a possibly low procalcitonin (PCT).

All (except for the above standing situations) patients in the "PCT intervention" group must have treatment according to the present guidelines, including interventions when procalcitonin is  $\geq 1,0$  ng/ml and "Alert"<sup>a</sup>.

Patients are categorized daily according to the PASS intervention categories, on the basis on the present and the previous PCT measurement (displayed as "Alert" or "Non-Alert" in the website). In correspondence with every category, a PASS-intervention is displayed below. The treatment is, adjusted according to new and relevant microbiology that "explains" the clinical picture

|                   |                                                                                                                                                                                                                                                        |
|-------------------|--------------------------------------------------------------------------------------------------------------------------------------------------------------------------------------------------------------------------------------------------------|
| <b>CATEGORY 1</b> | First PCT > 1,0 ng/ml, patient has not received antibiotics ( $\geq 1$ DDD <sup>b</sup> within 72 h)                                                                                                                                                   |
| <b>CATEGORY 2</b> | A) First PCT $\geq 1,0$ ng/ml, patient has received antibiotics ( $\geq$ DDD <sup>b</sup> within 72 h)<br>or<br>B) PCT "Alert" for 1 day after CAT 1, CAT 4 or CAT 5 has been started<br>or<br>C) PCT "Alert"*** from "start-sample" till next morning |
| <b>CATEGORY 3</b> | A) First PCT $\geq 1,0$ ng/ml, patient has received antibiotics ( $\geq$ DDD <sup>b</sup> within 72 h) and clinical suspicion of fungal infection or catheter related infection.<br>or<br>B) PCT "Alert" for 1 day after CAT 2 has been started        |
| <b>CATEGORY 4</b> | A) Start PCT < 1,0 ng/ml<br>or<br>B) "Non-Alert" PCT, but $\geq 1,0$ ng/ml.<br>or<br>C) PCT < 1,0 for 1-2 days                                                                                                                                         |
| <b>CATEGORY 5</b> | PCT < 1,0 ng/ml for 3 or more days.                                                                                                                                                                                                                    |

| Action            | Diagnostics                                                                                                                                                                                                                                                   | Surgery                                               | Antimicrobials <sup>c</sup>                                                                                                                                                                                                                                                                          |
|-------------------|---------------------------------------------------------------------------------------------------------------------------------------------------------------------------------------------------------------------------------------------------------------|-------------------------------------------------------|------------------------------------------------------------------------------------------------------------------------------------------------------------------------------------------------------------------------------------------------------------------------------------------------------|
| <b>CATEGORY 1</b> | <ul style="list-style-type: none"> <li>Blood culture</li> <li>Tracheal secretion</li> <li>Urine culture</li> <li>Culture from susp. source</li> <li>Diagnostic imaging of susp. source</li> </ul>                                                             | According to diagnostic imaging and clinical judgment | <ol style="list-style-type: none"> <li>Cefuroxim 1500 mg x 3 i.v. or Ampicillin 1g x 4 / 2 g x 3 i.v.</li> <li>Ciprofloxacin 400 mg x 2 i.v.</li> <li>Consider: Metronidazol 500 mg x 2 i.v.</li> </ol>                                                                                              |
| <b>CATEGORY 2</b> | <ul style="list-style-type: none"> <li>Blood culture</li> <li>Tracheal secretion</li> <li>Urine culture</li> <li>Culture from susp. source</li> <li>Diagnostic imaging of susp. source</li> </ul>                                                             | According to diagnostic imaging and clinical judgment | <ol style="list-style-type: none"> <li>Pip/Tazo<sup>d</sup> 4gx3 iv or Meropenem 1gx3 iv</li> <li>Ciprofloxacin 400 mg x 2 i.v.</li> <li>Metronidazol 500 mg x 2 i.v.</li> <li>Consider fungal infection: Fluconazole i.v. and cath. inf: Vancomycin, dosage acc.to. Se-Vanco<sup>e</sup></li> </ol> |
| <b>CATEGORY 3</b> | <ul style="list-style-type: none"> <li>Blood culture</li> <li>Tracheal secretion</li> <li>Urine culture</li> <li>Culture from susp. source</li> <li>Diagnostic imaging of susp. source</li> <li>Renewing oldest diagnostic imaging of susp. source</li> </ul> | According to diagnostic imaging and clinical judgment | <ol style="list-style-type: none"> <li>Pip/Tazo<sup>d</sup> 4gx3 iv or Meropenem 1gx3 iv</li> <li>Ciprofloxacin 400 mg x 2 i.v.</li> <li>Metronidazol 500 mg x 2 i.v.</li> <li>Fluconazol 400 mg x 2 i.v.</li> <li>Vancomycin, dosage acc.to. Se-Vanco<sup>e</sup></li> </ol>                        |
| <b>CATEGORY 4</b> | Nothing further                                                                                                                                                                                                                                               | Standard-of-care approach                             | Continue present treatment                                                                                                                                                                                                                                                                           |
| <b>CATEGORY 5</b> | Nothing further                                                                                                                                                                                                                                               | Standard-of-care approach                             | Re-consider the indication for antibiotics (standard-of-care principle)                                                                                                                                                                                                                              |

<sup>a</sup> 'Alert PCT' is defined as PCT-day1  $\geq$  PCT day 0 x 0.9. So a decrease in PCT from 11,2 ng/ ml to 10,5 ng/ ml is an "irrelevant decrease" and is defined as an "Alert" PCT. <sup>b</sup> DDD = Defined Daily Dosages). N.B.: The mentioned dosages are examples. Dosing regimen and frequency is prescribed according to the department guidelines (according to weight, kidney function, haemodialysis, Continuous dialysis etc.). <sup>c</sup> Antimicrobial spectrum covered can be broader than suggested (discretion of investigator). Administration of antimicrobials with a narrower spectrum on Alert-PCT days, should only take place when any antimicrobial treatment covering the suggested spectrum is contra-indicated and such a therapy should always be discussed and accepted by the coordinating centre. <sup>d</sup> Pip/Tazo: piperacillin/tazobactam. <sup>e</sup> Se-Vanco: serum-vancomycin measurements

**Diagram D2:**

**Meta-analysis of randomized trials using piperacillin-containing regimens exploring renal failure**

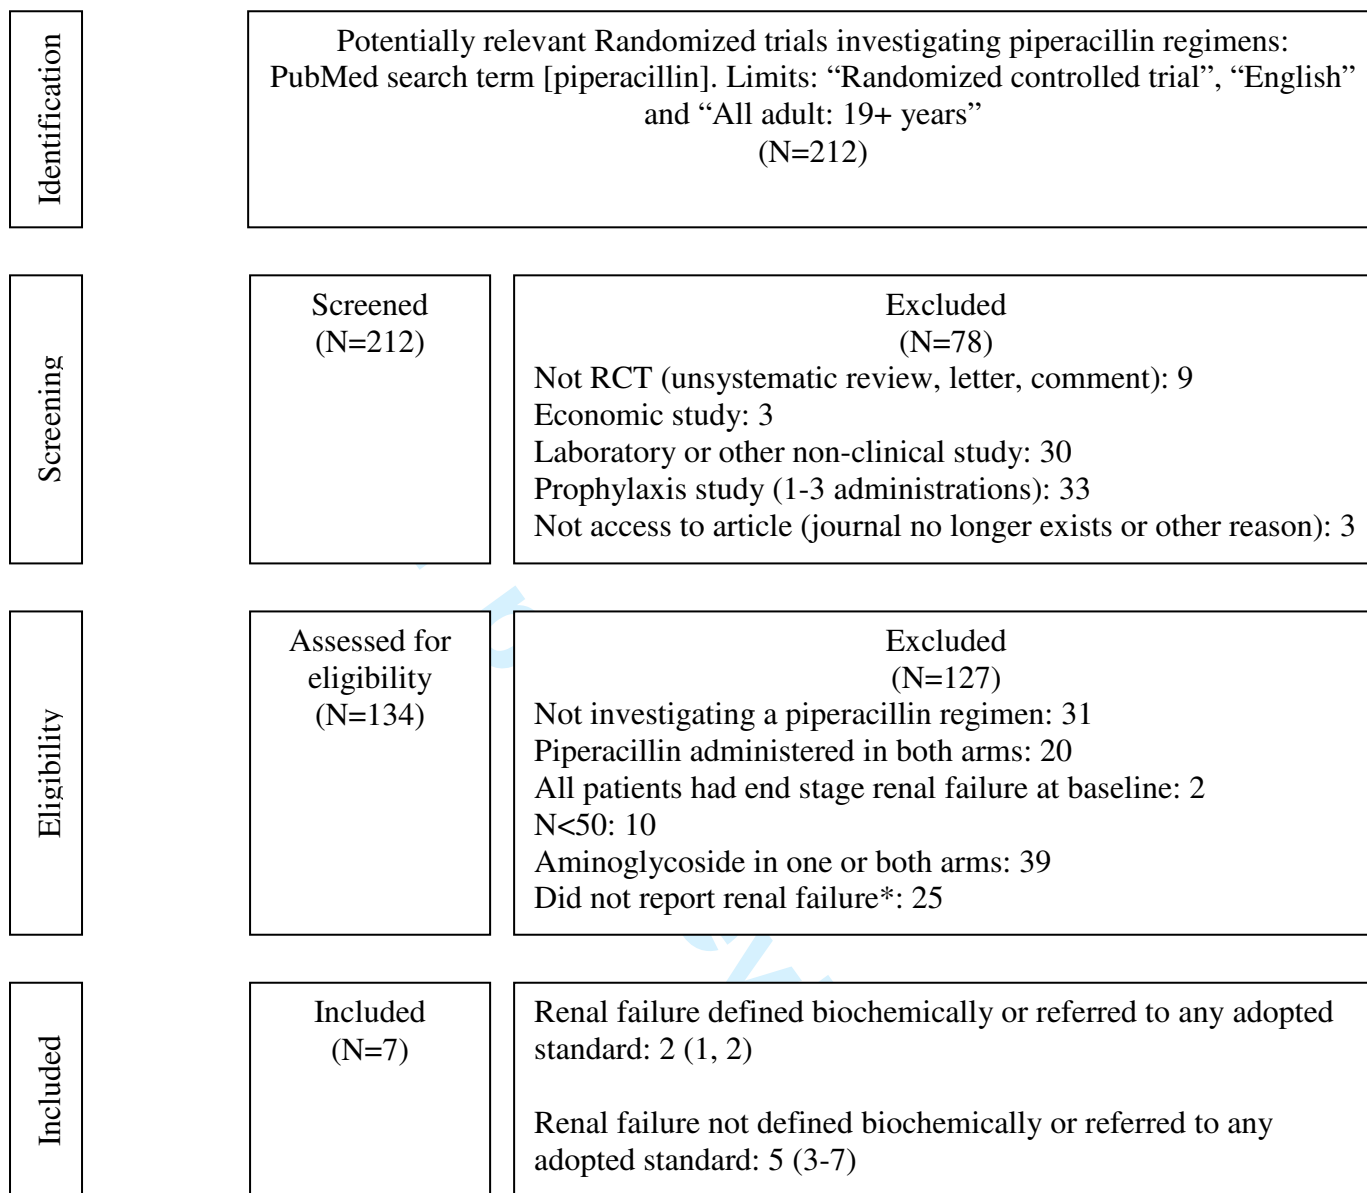

**Results:**

- In the initial identification phase, four ICU studies were found: They were excluded, since A) only a (non-defined) part of the patients received piperacillin(8), B) Both groups received piperacillin(9), C) one or both groups received aminoglycosides concomitantly(10, 11) .
- In the 7 (non-ICU) trials eventually included, 1592 episodes of therapy were observed.
- 21 cases of renal failure (not defined) occurred, corresponding to 1.3%.
- Hypothesizing, that the incidence of renal failure is 0.5% in non-piperacillin containing beta-lactam therapies, and aiming to find a risk increase to totally 1.5% (relative risk of 3.0), using conventional type I risk limit of 5% and a power of 80%, the sample size for such a trial investigating this should be approx. 3300 patients (non-ICU setting).
- In an ICU setting, the incidence of renal failure is often >20%. A trial of 1000 patients would be able to detect a risk increase to 28% (Relative risk:1.4) from e.g. piperacillin

\*All articles were reviewed for this. Additionally, in adobe documents with the search option (those not scanned), a search was made in each pdf document with search terms: “renal”, “kidney”, “nephro”, “creatinine” and “gfr”. More than the noted 25 of the articles did not report renal failure, however, if they fulfilled one or more of the other exclusion criteria, they were excluded because of this.

## References (for meta-analysis)

1. Anaissie EJ, Fainstein V, Bodey GP, et al. Randomized trial of beta-lactam regimens in febrile neutropenic cancer patients. *Am J Med.* 1988; 84: 581-9.
2. Winston DJ, Ho WG, Bruckner DA, et al. Beta-lactam antibiotic therapy in febrile granulocytopenic patients. A randomized trial comparing cefoperazone plus piperacillin, ceftazidime plus piperacillin, and imipenem alone. *Ann Intern Med.* 1991; 115: 849-59.
3. Schmitt DV, Leitner E, Welte T, et al. Piperacillin/tazobactam vs imipenem/cilastatin in the treatment of nosocomial pneumonia--a double blind prospective multicentre study. *Infection.* 2006; 34: 127-34.
4. Dela Pena AS, Asperger W, Kockerling F, et al. Efficacy and safety of ertapenem versus piperacillin-tazobactam for the treatment of intra-abdominal infections requiring surgical intervention. *J Gastrointest Surg.* 2006; 10: 567-74.
5. Philpott-Howard J, Burroughs A, Fisher N, et al. Piperacillin-tazobactam versus ciprofloxacin plus amoxicillin in the treatment of infective episodes after liver transplantation. *J Antimicrob Chemother.* 2003; 52: 993-1000.
6. Marra F, Reynolds R, Stiver G, et al. Piperacillin/tazobactam versus imipenem: a double-blind, randomized formulary feasibility study at a major teaching hospital. *Diagn Microbiol Infect Dis.* 1998; 31: 355-68.
7. Bohme A, Just-Nubling G, Bergmann L, et al. A randomized study of imipenem compared to cefotaxime plus piperacillin as initial therapy of infections in granulocytopenic patients. *Infection.* 1995; 23: 349-55.
8. Combes A, Luyt CE, Fagon JY, et al. Impact of piperacillin resistance on the outcome of Pseudomonas ventilator-associated pneumonia. *Intensive Care Med.* 2006; 32: 1970-8.
9. Rafati MR, Rouini MR, Mojtahedzadeh M, et al. Clinical efficacy of continuous infusion of piperacillin compared with intermittent dosing in septic critically ill patients. *Int J Antimicrob Agents.* 2006; 28: 122-7.
10. Alvarez-Lerma F, Insausti-Ordenana J, Jorda-Marcos R, et al. Efficacy and tolerability of piperacillin/tazobactam versus ceftazidime in association with amikacin for treating nosocomial pneumonia in intensive care patients: a prospective randomized multicenter trial. *Intensive Care Med.* 2001; 27: 493-502.
11. Brun-Buisson C, Sollet JP, Schweich H, et al. Treatment of ventilator-associated pneumonia with piperacillin-tazobactam/amikacin versus ceftazidime/amikacin: a multicenter, randomized controlled trial. VAP Study Group. *Clin Infect Dis.* 1998; 26: 346-54.



1  
2  
3  
4  
5  
6  
7  
8  
9  
10  
11  
12  
13  
14  
15  
16  
17  
18  
19  
20  
21  
22  
23  
24  
25  
26  
27  
28  
29  
30  
31  
32  
33  
34  
35  
36  
37  
38  
39  
40  
41  
42  
43  
44  
45  
46  
47  
48  
49

| Variable                                                     | Unadjusted analysis      |            | Multivariable analysis   |            |
|--------------------------------------------------------------|--------------------------|------------|--------------------------|------------|
|                                                              | Hazard ratio<br>(95% CI) | P-value    | Hazard ratio<br>(95% CI) | P-value    |
| Gender (Male vs. Female)                                     | 1.31 (0.99, 1.75)        | 0.06       | 1.30 (0.97, 1.73)        | 0.08       |
| Age ( $\geq 65$ years vs. $< 65$ years)                      | 1.90 (1.41, 2.55)        | $< 0.0001$ | 1.78 (1.31, 2.42)        | $< 0.0001$ |
| APACHE II score ( $\geq 25$ vs. $< 25$ )                     | 1.67 (1.24, 2.25)        | 0.001      | 1.29 (0.94, 1.76)        | 0.12       |
| Severe Sepsis/septic shock vs. Milder or no infection)       | 1.29 (0.97, 1.72)        | 0.08       | 1.31 (0.97, 1.76)        | 0.08       |
| Surgical patient (Yes vs. No)                                | 0.58 (0.41, 0.82)        | 0.002      | 0.54 (0.38, 0.77)        | 0.001      |
| Cancer (Yes vs. No)                                          | 1.19 (0.79, 1.79)        | 0.41       | NI                       | -          |
| Charlson score ( $\geq 2$ vs. $< 2$ )                        | 1.69 (1.28, 2.24)        | $< 0.0001$ | 1.68 (1.22, 2.30)        | 0.001      |
| eGFR $< 60$ mL/min/1.73 m <sup>2</sup> on day 7 (Yes vs. No) | 2.20 (1.66, 2.92)        | $< 0.0001$ | 2.29 (1.58, 3.34)        | $< 0.0001$ |

eGFR: estimated glomerular filtration rate; APACHE II: Acute Physiology And Chronic Health Evaluation II; NI: Not Included. Only patients who survived until day 7 were included in this analysis. Forward censoring was applied and variables with  $p < 0.2$  in the univariate analysis were entered into the multivariate model. If a creatinine measurement was not available on day 7, the last measured creatinine on day 1-6 was used. To not let hydration influence the eGFR estimations, baseline body weight was used for all daily eGFR estimations (so eGFR was a first degree function of measured creatinine for each patient). The analysis was stratified for baseline eGFR ( $< 30$  mL/min/1.73 m<sup>2</sup>, 30-60 mL/min/1.73 m<sup>2</sup>,  $> 60$  mL/min/1.73 m<sup>2</sup>). In a sensitivity analysis, not stratifying for baseline eGFR did not alter the signal.

# Protocol

**A randomised, single-blinded, multicentre trial to investigate if clinical management guided by daily standardised Procalcitonin measurements can reduce the mortality in critically ill patients**

**The Procalcitonin and Survival Study (PASS)**

**Version of protocol: 3.1**

**Date: December 2006**

**Intensive Care Units from many University Hospitals all over Denmark will participate:**

**Sponsor: Scientific:**

**Copenhagen HIV Programme (CHIP) 044, Hvidovre University Hospital, Denmark**

**: Economic: Danish Research Council (Danish State) and other independent research foundations**

**Protocol co-ordinator**

**Jens-Ulrik Stæhr Jensen**

H:S Hvidovre University Hospital

DK - 2650 Hvidovre

Denmark

Phone: +45 36 32 33 07

Fax: +45 36 47 33 40

E-mail: [koordinator@pass-studiet.dk](mailto:koordinator@pass-studiet.dk)

**INVESTIGATOR PROTOCOL AGREEMENT PAGE**

*THIS AGREEMENT IS EQUIVALENT TO A "SIGNED PROTOCOL"*

**The PASS Trial**

Name and qualifications of investigator:

*Name of Investigator:* \_\_\_\_\_

*Post held:* \_\_\_\_\_

*Clinical Centre:* \_\_\_\_\_

I agree:

- to assume responsibility for the proper conduct of the PASS Trial at this site.
- to conduct the trial in compliance with this protocol, any future amendments, and with any other trial conduct procedures provided.
- not to implement any deviations from or changes to the protocol without agreement from the sponsor and prior review and written approval from the Independent Ethics Committee (IEC), except where necessary to eliminate an immediate hazard to the subjects, or for administrative aspects of the trial (where permitted by all applicable regulatory requirements).
- that I am thoroughly familiar with the appropriate use of the Procalcitonin test and the interpretation of the test results, as described in this protocol, and any other information provided by the manufacturer of the test and by the PASS Coordinating centre.
- that I am aware of, and will comply with, "Good Clinical Practice" (ICH-GCP Guideline (CPMP/ICH/135/95, Directive 2001/20/EC)) and all applicable regulatory requirements.
- to ensure that all persons assisting me with the trial are adequately informed about the Procalcitonin test and interpretation and of their trial-related duties and functions as described in the protocol.

\_\_\_\_\_  
Signature of investigator

\_\_\_\_\_  
Date

*One signed copy each to be held by the Investigator and PASS Co-ordinating centre.*

**15/10/2007**

**TABLE OF CONTENTS**

|                                                                                                              |           |
|--------------------------------------------------------------------------------------------------------------|-----------|
| <b>PROTOCOL SUMMARY</b>                                                                                      | <b>5</b>  |
| <b>1 TRIAL BACKGROUND AND RATIONALE</b>                                                                      | <b>7</b>  |
| 1.1 Background                                                                                               | 7         |
| 1.2 Rationale - summary                                                                                      | 8         |
| 1.3 Procalcitonin analysing methods                                                                          | 9         |
| 1.4 Rationale for a 24 h interval between blood sampling                                                     | 10        |
| 1.5 Procalcitonin and immuno-compromised patients                                                            | 10        |
| 1.6 Studies on Procalcitonin biology and bacterial infection                                                 | 10        |
| 1.6.1 In vitro and animal studies                                                                            | 10        |
| 1.6.2 Human observational studies                                                                            | 11        |
| 1.6.3 Clinical trials                                                                                        | 11        |
| <b>2 TRIAL OBJECTIVES AND ENDPOINTS</b>                                                                      | <b>11</b> |
| 2.1 Trial Objectives                                                                                         | 11        |
| 2.2 Primary Objectives                                                                                       | 11        |
| 2.3 Secondary Objectives                                                                                     | 11        |
| 2.4 Trial Endpoint(s)                                                                                        | 12        |
| <b>3 INVESTIGATIONAL PLAN</b>                                                                                | <b>13</b> |
| 3.1 Trial Design                                                                                             | 13        |
| 3.2 Trial Population                                                                                         | 14        |
| 3.2.1 Inclusion Criteria                                                                                     | 14        |
| 3.2.2 Exclusion Criteria                                                                                     | 15        |
| 3.3 Treatment During Trial                                                                                   | 15        |
| 3.3.2 Change of PCT-guidance strategy during the trial                                                       | 18        |
| 3.3.2.1 Randomised PCT-guided interventions                                                                  | 18        |
| 3.3.2.2 The non-PCT guided interventions                                                                     | 18        |
| 3.3.3 Antimicrobial Drugs and Dosages                                                                        | 18        |
| 3.3.3.1 Overdose and Toxicity                                                                                | 19        |
| <b>4 MEASUREMENTS AND EVALUATION</b>                                                                         | <b>20</b> |
| 4.1 Time and Events Schedule                                                                                 | 20        |
| 4.1.1 Pre-entry Evaluations                                                                                  | 20        |
| 4.2 On Trial Evaluations                                                                                     | 22        |
| 4.3 Trial drugs                                                                                              | 24        |
| 4.3.1 Dosing Details                                                                                         | 24        |
| 4.3.2 Collection of Blood Samples for Daily Analysis                                                         | 24        |
| <b>5 DATA ANALYSIS METHODS</b>                                                                               | <b>26</b> |
| 5.1 Sample Size Determination                                                                                | 26        |
| 5.2 General Considerations                                                                                   | 26        |
| 5.2.1 Analysis Populations                                                                                   | 26        |
| 5.2.2 Interim Analysis                                                                                       | 27        |
| 5.2.3 Other Issues                                                                                           | 27        |
| 5.3 Efficacy                                                                                                 | 27        |
| 5.3.1 Primary Efficacy Endpoint                                                                              | 27        |
| 5.3.2 Secondary Efficacy Endpoint(s)                                                                         | 27        |
| 5.3.2.1 Other mortality assessments                                                                          | 27        |
| 5.3.3 Combined evaluation of mortality / occurrence of serious bacterial infection while admitted to the ICU | 28        |
| 5.4 Safety                                                                                                   | 29        |

|    |                    |                                                                                                                           |
|----|--------------------|---------------------------------------------------------------------------------------------------------------------------|
| 1  |                    |                                                                                                                           |
| 2  |                    |                                                                                                                           |
| 3  |                    |                                                                                                                           |
| 4  | <b>6</b>           | <b>ADVERSE EVENTS (AE) AND SERIOUS ADVERSE EVENTS (SAE) _____ 29</b>                                                      |
| 5  | 6.1                | Definition of an Adverse Event _____ <b>Fejl! Bogmærke er ikke defineret.</b>                                             |
| 6  | 6.1.2              | Definition of a Serious Adverse Event _____ <b>Fejl! Bogmærke er ikke defineret.</b>                                      |
| 7  | 6.1.3              | Protocol-specific Exemptions from the AE and SAE Definition _____ <b>Fejl! Bogmærke er ikke defineret.</b>                |
| 8  |                    |                                                                                                                           |
| 9  | 6.2                | Clinical Laboratory Abnormalities and Other Abnormal Assessments as AEs and SAEs <b>Fejl! Bogmærke er ikke defineret.</b> |
| 10 | 6.3                | Recording of the AEs and SAEs in the CRF _____ <b>Fejl! Bogmærke er ikke defineret.</b>                                   |
| 11 | 6.4                | Documenting AEs and SAEs _____ <b>Fejl! Bogmærke er ikke defineret.</b>                                                   |
| 12 | 6.5                | Follow-up of AEs and SAEs _____ <b>Fejl! Bogmærke er ikke defineret.</b>                                                  |
| 13 | 6.6                | Time-lines for reporting of SAEs _____ <b>Fejl! Bogmærke er ikke defineret.</b>                                           |
| 14 |                    |                                                                                                                           |
| 15 | <b>7</b>           | <b>TRIAL ADMINISTRATION _____ 30</b>                                                                                      |
| 16 |                    |                                                                                                                           |
| 17 | 7.1                | Data Collection _____ 30                                                                                                  |
| 18 | 7.2                | Regulatory and Ethical Considerations _____ 31                                                                            |
| 19 | 7.2.1              | Regulatory Authority Approval _____ 31                                                                                    |
| 20 | 7.2.2              | Ethics Approval _____ 31                                                                                                  |
| 21 | 7.2.3              | Subject Informed Consent _____ 31                                                                                         |
| 22 |                    |                                                                                                                           |
| 23 | 7.3                | Trial Monitoring _____ 32                                                                                                 |
| 24 | 7.4                | Quality Assurance _____ 33                                                                                                |
| 25 | 7.5                | Trial and Site Closure _____ 33                                                                                           |
| 26 | 7.6                | Records Retention _____ 34                                                                                                |
| 27 | 7.7                | Information Disclosure and Inventions _____ 34                                                                            |
| 28 | 7.7.1              | Confidentiality _____ 34                                                                                                  |
| 29 | 7.7.2              | Publication _____ 35                                                                                                      |
| 30 |                    |                                                                                                                           |
| 31 | 7.8                | Indemnification and Compensation for Injury _____ 35                                                                      |
| 32 |                    |                                                                                                                           |
| 33 | <b>8.</b>          | <b>REFERENCES _____ 36</b>                                                                                                |
| 34 | <b>9.</b>          | <b>APPENDICES _____ 43</b>                                                                                                |
| 35 |                    |                                                                                                                           |
| 36 | <b>Appendix 1:</b> | <b>The Declaration of Helsinki _____ 43</b>                                                                               |
| 37 | <b>Appendix 2:</b> | <b>Abbreviations _____ 44</b>                                                                                             |
| 38 | <b>Appendix 3:</b> | <b>Table of conversion factors for laboratory units _____ 45</b>                                                          |
| 39 | <b>Appendix 4:</b> | <b>Table of the used antibacterial and antifungal drugs _____ 48</b>                                                      |
| 40 |                    |                                                                                                                           |
| 41 |                    |                                                                                                                           |
| 42 |                    |                                                                                                                           |
| 43 |                    |                                                                                                                           |
| 44 |                    |                                                                                                                           |
| 45 |                    |                                                                                                                           |
| 46 |                    |                                                                                                                           |
| 47 |                    |                                                                                                                           |
| 48 |                    |                                                                                                                           |
| 49 |                    |                                                                                                                           |
| 50 |                    |                                                                                                                           |
| 51 |                    |                                                                                                                           |
| 52 |                    |                                                                                                                           |
| 53 |                    |                                                                                                                           |
| 54 |                    |                                                                                                                           |
| 55 |                    |                                                                                                                           |
| 56 |                    |                                                                                                                           |
| 57 |                    |                                                                                                                           |
| 58 |                    |                                                                                                                           |
| 59 |                    |                                                                                                                           |
| 60 |                    |                                                                                                                           |

**A randomised, single blinded, multicentre trial to evaluate whether daily Procalcitonin measurements and immediate diagnostic and therapeutic response on abnormal values and day-to-day changes can reduce the mortality of critically ill patients in the Intensive Care Unit.**

## The Procalcitonin And Survival Study (PASS)

### PROTOCOL SUMMARY

#### Inclusion:

Fulfilment of all of the following three criteria:

- 1 Male or female, aged  $\geq 18$  years of age.
- 2 Admitted to the participating intensive care units (ICU) at following hospitals: Hvidovre Hospital; Bispebjerg Hospital; Herlev Hospital; Glostrup Hospital; Gentofte Hospital; Hillerød Hospital; Roskilde Hospital; Århus University Hospital, Århus; Århus University Hospital, Skejby.
- 3 1) Ability to understand and provide written informed consent to participate in this trial,  
**or**  
2) Ability to understand and provide oral informed consent in presence of at least one impartial witness who should sign and personally date the consent form  
**or**  
3) The subjects legally acceptable representative can understand and provide written informed consent if the subject is not capable of this because of the present mental or physical condition of the subject.

#### Exclusion:

A subject will **NOT** be eligible for inclusion in this trial if any of the following criteria apply:

1. Subjects with known hyper-bilirubinaemia ( $>0.4$  mg/ ml) or hypertriglyceridaemia ( $>10$  g/l) since this can interfere with measurements. If subjects with unknown status on these points are included and have PCT measurements, the measuring-equipment will detect these conditions.
2. Subjects suffering from a blood disorder, where daily sampling of 7 ml of blood for maximally 28 days (210 ml distributed on 28 days) will be an inconvenience or a potential risk, which could compromise the safety of the subject.
3. Subjects who are pregnant or breast feeding

1  
2  
3  
4  
5  
6  
7 The *a priori* probability of surviving with the normal recommended diagnostics and treatment  
8 with the presently available means to detect infections and on the other hand the normal  
9 diagnostics and treatment together with daily Procalcitonin measurements and prompt clinical  
10 reaction should be equal.  
11  
12

13  
14  
15 **Randomisation:**

16  
17 Two arms (1:1), n = 500 per arm:

18  
19 Arm 1: Normal recommended diagnostics and treatment of infections in the intensive  
20 care unit (standard of care)  
21

22  
23 Arm 2: Normal recommended diagnostics and treatment of infections in the intensive  
24 care unit (standard of care) **and** Procalcitonin guided diagnostics and treatment of  
25 infection  
26  
27

28  
29 **Primary Trial Objective:** To address whether daily Procalcitonin measurements and immediate  
30 diagnostic and therapeutic response on abnormal values and day-to-day changes can reduce  
31 the mortality of critically ill patients in the ICU.  
32

33  
34 **Trial registration days:** Intensive Care Unit admission day, running routine registration of  
35 examinations and blood tests, day of discharge or death, day 28 after admission, day 60, 90,  
36 120 and 180 after discharge.  
37

38  
39 **Data collection:** The data collection will be simple and performed real time via fax.  
40  
41  
42  
43  
44  
45  
46  
47  
48  
49  
50  
51  
52  
53  
54  
55  
56  
57  
58  
59  
60

# 1 TRIAL BACKGROUND AND RATIONALE

## 1.1 Background

### 1.1.1 Sepsis and mortality in the Intensive Care Unit

Sepsis remains a major cause of mortality in critically ill patients admitted to the Intensive Care Unit (ICU)<sup>1-2</sup>. All-cause mortality during ICU admission ranges from 12.1% in non-infected patients to 43.9% in infected patients<sup>3</sup>. Patients who are discharged to other departments and later to their own home or an institution for rehabilitation, continue to have a high mortality (additionally 10-20%) for 20-30 days after ICU discharge<sup>4-7</sup>. Different explanations for this have been proposed. Among the most important are:

- 1) During ICU admission it becomes clear that further treatment lacks perspective for the patient (often chronic organ diseases and cancer diseases) and the patient is therefore discharged to the relevant department when discharge from the ICU is possible.
- 2) After discharge from the ICU the physical condition of the patient deteriorates because of a severe disease with a dismal prognosis and it is decided together with the patient and relatives that the patient should not be admitted to the ICU again.
- 3) Critically ill patients often have an immunological incompetence and therefore these patients are susceptible to serious infections. Additionally these infections often have an atypical course and thereby a delayed diagnosis. This immunological incompetence prevails some time after discharge from the ICU why the patient remains susceptible to infections for this period of time. There is a grave risk that these serious infections with an atypical course can be diagnosed late in the course and cause an increased risk of mortality for critically ill patients.

### 1.1.2 Procalcitonin and bacterial infections

In 1993 Assicot et al. reported that a high level of serum-Procalcitonin (PCT) was closely related to bacterial infection and seemingly correlated to the severity of the infection<sup>8</sup>. This finding has since been ascertained in many studies demonstrating high levels (2.0 ng/ml-50.0 ng/ml (-1500 ng/ml)) of PCT in patients with systemic bacterial infection, while low levels have consistently been found in patients with localised bacterial infections and viral infections<sup>9-16</sup>. Others have shown low PCT levels (and seldom up till maximally 3.0 ng/ml) in non-infected patients following surgery, trauma and myocardial infarction<sup>10, 17-21</sup>. Sensitivity and specificity for sepsis when PCT levels are above 5.0 ng/ml have been estimated to 80-90% and 85-100%, respectively, in the largest of these studies.

The PCT level starts decreasing within 24 h after surgery, trauma and myocardial infarction in non-infected patients in contrast to the C-reactive protein, which has a peak level 36-72 h after these events<sup>10-17-21</sup>.

Consequently, bacterial infection is suspected if PCT is increasing 24 h after surgery, trauma or myocardial infarction.

### 1.1.3 Procalcitonin kinetics, biochemistry and cellular biology

PCT is a 13 kDa, 116 amino acid polypeptide, initially described as a pro-hormone of Calcitonin, a



hormone in the calcium metabolism, which is produced in the medullary C-cells in the thyroid gland<sup>22-24</sup>.

Recent studies have shown that the PCT variant, which is related to infection is produced in other tissues (liver, kidney, muscle, fat)<sup>25-27</sup>

Kinetic studies with healthy humans and baboons have shown a rapid release of PCT within 2-6 hours after injection of bacteria or bacterial endotoxin. This time to release is significantly shorter than that of C-reactive protein (8-24 h). The plasma half life of PCT is approximately 24 h. PCT measurements in healthy, uninfected volunteers has been shown very low levels (<0.05 ng/ml)<sup>10,28-29</sup>.

#### 1.1.4 Procalcitonin-guided treatment and reduction in the use of antimicrobial agents

A recent study has demonstrated a reduced use of antimicrobial agents in patients with lower respiratory tract symptoms, when the treatment was guided by the initial PCT level<sup>30</sup>.

#### 1.1.5 Procalcitonin and risk of mortality

We have shown that a PCT increase after reaching a level of 1.0 ng/ml is an independent predictor of mortality in critically ill patients. Patients who did not reach a PCT level above 1.0 ng/ml had an all cause mortality risk of 4.7% while admitted in the ICU, compared to an all cause mortality of 19.1% for the whole population of ICU patients. Patients who reached a PCT value above 1.0 ng/ml who had a decreasing PCT the next day had a mortality risk of 18.9%, but patients who had an increasing PCT level after reaching 1.0 ng/ml had a mortality risk of 32.7%. This increase in mortality risk was significant for the entire follow-up period of 90 days<sup>31</sup>.

The mortality risk increased for every day the PCT increased. Taking in mind the close relation between PCT levels and bacterial infection, a large part of this mortality increase is (when PCT is increasing), to the best of the existing knowledge, attributable to uncontrolled bacterial infections. This is supported by the findings of the European Sepsis Group<sup>3</sup>.

The rapid release of PCT to the blood stream (2-6 h), when infection is progressing, makes acute detection of ongoing serious infection possible, hereby potentially reducing mortality in critically ill patients if treatment is guided acutely by PCT measurements.

## 1.2 Rationale - summary

Sepsis and complications to sepsis are major causes of mortality in critically ill patients<sup>1-2</sup>. Rapid treatment of sepsis is of crucial importance for survival of patients. In the ICU, the infectious status of the patient is often difficult to assess because symptoms cannot be expressed (unconscious or sedated patients) and signs may present atypically because of immunologic incompetence and masking by the drugs given and thermo-influencing-therapy, i.e. dialysis. Biological and biochemical markers of inflammation (WBC, C-reactive protein) may often be influenced by other parameters than infection, such as: trauma, surgery, other types of inflammation such as rheumatoid diseases (C-reactive protein) and gluco-corticosteroid treatment (WBC), and may be unacceptably slowly released after progression of an infection<sup>32-33</sup>. At the same time, lack of a relevant antimicrobial therapy in an early course of infection may be fatal for the patient.

1  
2  
3 For these reasons, in the clinical setting, it is often necessary to initiate or adjust antimicrobial  
4 therapy on an unsure ground and the relevant therapy may in some situations be delayed for  
5 important hours or even days. Specific and rapid markers of bacterial infection have been  
6 sought for use in the ICU. Mortality in critically ill patients increases gravely when Procalcitonin  
7 levels increase from day to day<sup>31</sup>. Low PCT levels have been shown to effectively rule out  
8 sepsis<sup>12</sup>.

9  
10  
11  
12  
13  
14 However, no randomised controlled trials have been conducted to show if mortality in critically ill  
15 patients can be reduced by using a strategy of daily standardised Procalcitonin measurements  
16 as an early detector of serious bacterial infection. Therefore evidence is presently not sufficient  
17 to introduce daily consecutive Procalcitonin measurements to guide the diagnostic and  
18 therapeutic management of patients admitted to the ICU .

19  
20  
21  
22  
23 The rationale for this trial is to assess the ability of daily Procalcitonin measurements to reduce  
24 the mortality of critically ill patients.

### 25 26 27 28 **1.3 Procalcitonin analysing methods**

29 There are four commercially available analysing methods for measuring blood levels of Procalcitonin, one  
30 semi-quantitative and three quantitative. Two of these are described below, the oldest and most used  
31 test, LUMITEST® BRAHMS /BRAHMS PCT LIA, and a newer fully automated test with a higher  
32 sensitivity, KRYPTOR® PCT BRAHMS. KRYPTOR® PCT BRAHMS will be used for all Procalcitonin  
33 analyses in this study<sup>34</sup>.

#### 34 35 36 37 38 **1.3.1 LUMITEST® BRAHMS /BRAHMS PCT LIA**

39 The oldest and so far most used quantitative test is LUMITEST® BRAHMS /BRAHMS PCT LIA.  
40 Analysis is made by a "sandwich" luminiscens immuno-assay with an anti-catacalcin coated tube:  
41 Anti-**Catacalcin** binds catacalcin in the patient sample and is hereby immobilised (catacalcin  
42 could otherwise interfere with the analysis).

43 Anti-**Calcitonin** antibody is marked with a luminescent *acridin*-derivative.

44 H<sub>2</sub>O<sub>2</sub> and NaOH are added and these react with the *acridin*-derivative which leads to the  
45 formation of *acridon* and this process is accompanied by transmission of light. The quantity of this  
46 light is proportional to the Procalcitonin concentration in the sample.

47 We have found a coefficient of variation (CV) in the measuring interval between 0.1 ng/ml-1.0  
48 ng/ml of 0.09-0.83 for this test. At PCT levels above 1.0 ng/ml, we found CV's of 0.008-0.065  
49 (range)<sup>37</sup>.

50 The manufacturer claims a *functional assay sensitivity* (CV<0.2) of 0.3 ng/ml.

#### 51 52 53 54 55 56 57 58 **1.3.2 KRYPTOR® PCT BRAHMS**

59 A new, and according to the manufacturer, more precise assay is the fully automated  
60 KRYPTOR® PCT BRAHMS. Procalcitonin is analysed using the analysing machine KRYPTOR®  
and fluids and utensils from the company BRAHMS diagnostica, Berlin. KRYPTOR® uses

TRACE technology (Time Resolved Amplified Cryptate Emission), which is a non-radiating transmission of energy. The transmission happens between two fluorescent compounds: Europium Cryptate (donor) and XL665 (acceptor). While the antigen-antibody complex is formed, a signal is measured.

The functional assay sensitivity (CV < 0.2) is according to the manufacturer 0.06 ng/ml for the KRYPTOR® test. In the relevant clinical interval (which has not quite been defined yet) the CV is 0.02-0.03 (product information).

- Studies concerning Procalcitonin have so far mainly been using LUMITEST® BRAHMS /BRAHMS PCT LIA.

#### 1.4 Rationale for a 24 h interval between blood sampling

Several studies have shown a half-life of Procalcitonin of 20-30 hours and Procalcitonin levels increase 2-6 h after bacterial products are presented in the blood stream<sup>10,28-29, 35</sup>. An important exception to this is patients suffering from severe uraemia, where the Procalcitonin half-life is prolonged, but it has been demonstrated, that Procalcitonin is removed by dialysis<sup>35</sup>. Studies concerning Procalcitonin and surgery have shown, that the Procalcitonin blood level is on a decreasing curve 24 h after major thoracic and abdominal surgery, except in infected patients<sup>17-21</sup>. In conclusion, a Procalcitonin level which is increasing 24 h after a therapy shift or after surgery suggests progression of infection.

#### 1.5 Procalcitonin and immuno-compromised patients

Markers and mediators of inflammation and infection are often dependent on a functioning immune system, which is able to produce the substance measured, e.g. WBC, TNF, different interleukins<sup>10,15,16, 36</sup>. It has been established that Procalcitonin is not dependent on blood cells and their mediators, and Procalcitonin is mainly produced by tissues like liver, kidney, muscle and fat<sup>25-28</sup>. In concordance with this, studies investigating Procalcitonin in neutropenic patients have found results comparable to those for immuno-competent patients<sup>36-41</sup>. A few studies regarding neutropenic patients that compared PCT levels to positive blood cultures have found a low sensitivity of the test for bacteriemia, but these studies lack clear definitions of virulence of different micro-organisms (e.g. Coagulase negative staphylococci vs. Gram negative rods) in their study designs<sup>40</sup>.

#### 1.6 Studies on Procalcitonin biology and bacterial infection

##### 1.6.1 In vitro and animal studies

In vitro studies have shown Procalcitonin to be an inducer of albumin synthesis in rat liver tissue measured on mRNA and protein synthesis. This was found to be opposite to TNF $\alpha$  and IL-6, these substances lowering albumin synthesis<sup>42</sup>. In a study of sepsis in baboons, low PCT was

found in non-infected subjects and high PCT in infected subjects, and PCT blood levels started increasing after 2 hours<sup>10</sup>. In another baboon model Procalcitonin incompetence was shown in an anhepatic subject<sup>28</sup>.

In a study of burn wound and *Pseudomonas aeruginosa* septicaemia in rats, a high correlation between endotoxin levels and PCT in blood was found<sup>43</sup>.

### 1.6.2 Human observational studies

Most of the present knowledge on Procalcitonin has been established by observational studies. Key-references are mentioned in paragraph 1.1 and 1.2

### 1.6.3 Clinical trials

Only few Randomized Controlled Trials regarding PCT-guided treatment have so far been published, one of special interest has used PCT-guided treatment (n=119+124) and has assessed the ability of this clinical strategy to reduce use of antimicrobial therapy in patients with suspected lower respiratory tract infection. A Relative Risk of 0.49 [95% CI 0.44-0.55] for antibiotic exposure was demonstrated, without any significant difference in culture growth from patient samples, quality of life, mortality, inflammatory parameters (temperature, C-reactive protein, WBC), number of days admitted and need for stay in intensive care unit. The study was designed to detect a 30 % difference with 95% stringency. However some of the mentioned endpoints do not occur in all patients, and in these cases (mortality, need for stay in ICU) it may be false to conclude, that there is no difference between groups within the chosen 30 % limit<sup>30</sup>. A very small study (n=12+13=25) has tried to investigate empiric prophylaxis with fluor-quinolone Ofloxacin in patients with abdominal aortic aneurism. However the sample size of this study does not justify any conclusions on this issue<sup>44</sup>.

## 2 TRIAL OBJECTIVES AND ENDPOINTS

### 2.1 Trial Objectives

### 2.2 Primary Objectives

To address whether immediate diagnostic and therapeutic initiatives guided by abnormal high and increasing values of Procalcitonin measured daily can reduce the mortality of critically ill patients in the ICU.

### 2.3 Secondary Objectives

1. To determine mortality of ICU patients at discharge from the ICU, at day 60,90, 120 and 180.

- 2.
  - 3.
  - 4.
  - 5.
  - 6.
  - 7.
  - 8.
  - 9.
  - 10.
  - 11.
  - 12.
  - 13.
  - 14.
  - 15.
  - 16.
  - 17.
  - 18.
  - 19.
  - 20.
  - 21.
  - 22.
  - 23.
  - 24.
  - 25.
  - 26.
  - 27.
  - 28.
  - 29.
  - 30.
  - 31.
  - 32.
  - 33.
  - 34.
  - 35.
  - 36.
  - 37.
  - 38.
  - 39.
  - 40.
  - 41.
  - 42.
  - 43.
  - 44.
  - 45.
  - 46.
  - 47.
  - 48.
  - 49.
  - 50.
  - 51.
  - 52.
  - 53.
  - 54.
  - 55.
  - 56.
  - 57.
  - 58.
  - 59.
  - 60.
2. To determine differences in prescription of antimicrobial therapy in the two arms.
  3. To determine the frequency of patients with complications to infection in the two arms, defined as; sepsis, severe sepsis, septic shock, disseminated intravascular coagulation, multi-organ dysfunction syndrome (MODS), coma (Glasgow Coma Scale), hypotension, respiratory insufficiency (ventilator treatment need), liver insufficiency, acute uremia (three times increase in baseline creatinine).
  4. APACHE II score
  5. Accumulated PCT increases over time
  6. To determine the number of diagnostic image procedures per day after enrolment in the trial in the two arms
  7. To determine the number of non-routine microbiological samples taken per day after enrolment in the trial in the two arms
  8. To determine the number of surgical procedures per day after enrolment in the trial in the two arms
  9. To determine the time to the first change in antimicrobial chemotherapy after admittance to the ICU in the two arms

## 2.4 Trial Endpoint(s)

### **Primary:**

Mortality at day 28 after admission to the ICU.

### **Secondary:**

1. Mortality while admitted to the ICU, Mortality at day 60, 90 and 180 after admission to the ICU
2. Defined day doses of antimicrobial therapy in each arm
3. Occurrence of sepsis, severe sepsis, septic shock, DIC. Assessment of Glasgow Coma Scale, measurement of Blood Pressure (systolic blood pressure < 90), days with artificial ventilation, Factor 2-7-9 < 0.7, creatinine (increase factor 3 from baseline), MODS.
4. SOFA score daily (Temperature, Mean Arterial Pressure, Heart Rate, Respiratory Rate, FIO<sub>2</sub>, HCO<sub>3</sub><sup>-</sup>, pH (arterial), Se- Na<sup>+</sup>, K<sup>+</sup>, Creatinine, Haematocrite, White Blood Count+ differential count, Glasgow Coma Scale).

5.  $AUC_{\text{Procalcitonin}}$  for the Procalcitonin-measuring group and for the control group.
6. Number of diagnostic images after admission to the ICU.
7. Number of non-routine microbiological sample taken after admittance to the ICU.
8. Number of surgical procedures during the trial
9. Time to the first change in antimicrobial chemotherapy after admittance to the ICU

### 3 INVESTIGATIONAL PLAN

#### 3.1 Trial Design

##### 3.1.1 Intervention

This is a randomised, single-blinded multicentre trial.

Approximately 1000 subjects admitted to an ICU in the participating University hospitals will be included. All patients included will receive the the standard recommended diagnostic and therapeutic procedures mandated at the particular ICU. Additionally, the patients will be randomised for:

1. No PCT guided diagnostics and treatment (i.e. the standard-of-care / **control arm**).

Or

2. Daily PCT measurements and protocol-specified additional diagnostic and/or therapeutic interventions guided by the PCT levels observed. High or increasing PCT levels will mandate such interventions (see section 3.3.1 for details of interventions)(the **PCT intervention arm**)

##### 3.1.2 Randomisation

The randomisation is performed by the PASS study centre and is stratified according to site, age and initial Acute Physiology And Chronic Health Evaluation II (APACHE II) score. For patients randomised to the PCT intervention arm, daily PCT levels are communicated to the team responsible for the clinical management together with a recommendation of what interventions the investigator team is expected to initiate based on the PCT measurement. In

1  
2  
3 the control arm, blood samples for PCT will be analysed simultaneously with samples from the  
4 PCT intervention arm, but results of these PCT analyses will remain blinded for the investigators  
5 until the study has been completed. The PCT measurements will be conducted daily as long as  
6 the patient is admitted to the ICU, but maximally 28 days from time of enrolment in this study.  
7  
8 While patients remain in the hospital, and after discharge from the ICU, samples will be  
9 collected for PCT determination but the samples will not be analysed real-time and hence the  
10 results will not be used to guide interventions outside the ICU, except if requested by the ICU  
11 investigator in conjunction with the discharge of the patient. Patients transferred from one ICU  
12 to another ICU, will remain in the trial provided that the receiving ICU also participates in this  
13 trial.  
14  
15  
16  
17  
18  
19  
20  
21  
22

## 23 3.2 Trial Population

### 24 3.2.1 Inclusion Criteria

25  
26  
27 A subject will be eligible for inclusion in this trial only if all of the following criteria apply:  
28  
29

- 30  
31 1 Male or female, aged  $\geq 18$  years of age.  
32  
33 2 Admitted to the participating intensive care units. Patients should be included within 24  
34 h. If a patient has not been included at this time, this patient cannot be included in the  
35 present admittance.  
36  
37 3 Subjects should in the investigator's opinion be likely to be admitted to the ICU for more  
38 than 24 h. Subjects should not be likely (<10%) to die or be discharged in this period of  
39 time  
40  
41 4 Ability to understand and provide written informed consent to participate in this trial,  
42  
43 **or**  
44  
45 Ability to understand and provide oral informed consent in presence of at least one  
46 impartial witness who should sign and personally date the consent form  
47  
48 **or**  
49  
50 The subjects legally acceptable representative can understand and provide written  
51 informed consent if the subject is not capable of this because of the present mental or  
52  
53  
54  
55  
56  
57  
58  
59  
60



### 3.2.2 Exclusion Criteria

A subject will **NOT** be eligible for inclusion in this trial if any of the following criteria apply:

4. Subjects with known hyper-bilirubinaemia (>0.4 mg/ ml) or hypertriglyceridaemia (>10 g/l) since this can interfere with measurements. If subjects with unknown status on these points are included and have PCT measurements, the measuring-equipment will detect these conditions.
5. Subjects suffering from a blood disorder, where daily sampling of 7 ml of blood for maximally 28 days (210 ml distributed on 28 days) will be an inconvenience or a potential risk, which could compromise the safety of the subject.

### 3.3 Treatment During Trial

The aim of the PCT guided treatment is to reduce time to relevant treatment of a serious infection and thereby to reduce the mortality. All subjects will receive the standard-of-care evaluations and therapeutic interventions recommended in the ICU at which the patient is admitted to. Subjects in the PCT measurement group will additionally receive expanded diagnostics and treatment should the PCT levels be found to high and/or increasing (see section 3.3.1 for definitions).

Access to results of PCT measurements of any kind (semi-quantitative or quantitative) at any time in the study period is not allowed for patients randomised to the control arm.

The PASS study group in collaboration with the PASS Steering Committee, will issue guidelines for the composition of the interventions that a high or increasing PCT level would mandate. Some variation between sites is acceptable, whereas all patients within a given ICU should follow that ICU's guidelines. The guidelines will be updated when new information becomes available. In the guidelines, there may be several alternatives indicated for a given situation. The investigator is not mandated to follow the guidelines.

#### 3.3.1 Procalcitonin levels and diagnostic and therapeutic consequences

The situation mandating additional interventions in the the PCT intervention arm is based on the following criteria:

- PCT levels  $\geq$  1.00 ng/ml

and



- The PCT level increases one day to the next or has an irrelevant decrease of < 10%

The daily assessment of PCT guided interventions will be as follows:

- Subjects with PCT levels  $\geq 1.00$  ng/ml based on the first determination after enrolment into the study will follow the principles for interventions as detailed below.
- Subjects with PCT levels  $\geq 1.00$  ng/ml and with a day (n) to day (n+1) PCT increase or a decrease of < 10% (irrelevant decrease) will follow the principles for interventions as detailed below.
  - Microbiology: blood cultures, airway cultures, urine cultures and samples from any other suspected foci.
  - Considerations of whether to perform diagnostic imaging: one or more of the following: Chest X-ray, Ultra-sonic examination of suspected focus, Computerised Tomography of relevant areas, Magnetic Resonance imaging of relevant areas, other imaging techniques.
  - Surgical drainage of possible un-drained foci
  - Antimicrobial therapy expansion. Treatment will be guided by any relevant findings: microbial or diagnostic imaging, or other findings. If focus and micro organism of infection is not clear steps will be:
    - 1) Empirical sepsis treatment
    - 2) Empirical sepsis treatment with anaerobic and gram positive coverage
    - 3) Empirical sepsis treatment with anaerobic and gram positive coverage and/ or fungal treatment
- Subjects with PCT levels < 1.00 ng/ml will continue to receive standard-of-care
- Subjects with PCT levels  $\geq 1.00$  ng/ml and with a day-to-day PCT decrease of  $\geq 10\%$  will continue to receive standard-of-care.

Precise guidelines for this (antimicrobial) treatment will be made specifically for every ICU in concordance with the local choices regarding antimicrobial agents. For PCT guided diagnostics and treatment algorithm, see Diagram 1:



### 3.3.2 Change of PCT-guidance strategy during the trial

#### 3.3.2.1 Randomised PCT-guided interventions

Subjects may **discontinue** the interventions initiated on the basis of PCT measurements only in case the benefit: risk ratio for these interventions is not acceptable to the treating physician. The specific concern will be collected.

#### 3.3.2.2 The non-PCT guided interventions

The recommended interventions based on other information than PCT measurements should always be instituted and continued when relevant from a clinical judgement.

#### 3.3.3 Antimicrobial Drugs and Dosages

All antimicrobial drugs prescribed on basis of an increasing PCT must be prescribed by the investigator or an intensive care physician, who has been sufficiently instructed in all aspects of the trial. The investigator must check for possible drug-drug interactions between any of the drugs prescribed guided by PCT changes and other agents that may be metabolised via the same enzyme systems or organs. To assist the investigator, information on this topic is included in the Manual of Operational Procedures. Also, the product label of each drug prescribed should be reviewed.

General principles that will be followed regarding antimicrobial therapy of sepsis are:

- Antimicrobial agents are prescribed, when possible, according to the resistance pattern of the causative microorganism.
- When the causative microorganism is not known, antimicrobial agents are prescribed according to knowledge of which microorganisms normally and possibly infect the suspected focus.
- When neither the microorganism nor the focus of infection is known, one or more broad spectrum antimicrobial agents are selected. If the effect is not sufficient, the spectrum of the used antimicrobial agents is additionally expanded, often with anaerobic active agents, gram positive active agents and antifungal agents. Conversely, if the effect is sufficient, the spectrum of used antimicrobial agents is narrowed according to knowledge of focus and causative microorganism.
- In empiric sepsis treatment, a combination of a  $\beta$ -lactam/ Carbapenem + a fluor-quinolone is chosen if not contra indicated in the specific subject. This treatment can be

1  
2  
3 supplemented with nitroimidazoles, glycopeptides, oxazolidinones and azoles. More  
4 specific treatment regimes are initiated and guided by findings regarding the causative  
5 microorganism and/or focus of infection.  
6  
7

8  
9 Dosages of antibiotics are decided according to the recommendations of the specific  
10 ICU.  
11

12  
13 The toxicity management guidelines detailed below refer to all components of the antimicrobial  
14 treatment used in the trial.  
15

### 16 17 18 19 **3.3.3.1 Overdose and Toxicity**

20 Antimicrobial agents may be interrupted because of the development of adverse events (AEs,  
21 see section 6.1 for definitions) at the discretion of the investigator and according to the severity  
22 of the AE. The dose of all antimicrobial drugs may be reduced, interrupted or reintroduced  
23 according to standard practice at the time, and depending on the severity of the AE.  
24  
25  
26

27  
28 Subjects who require a dose modification should be re-evaluated on a daily basis.  
29

30  
31 The investigator is responsible for taking appropriate precautions to ensure that the risk of  
32 developing toxicity is minimised, that the subject is monitored for the development of toxicity,  
33 and if such toxicities do occur, take appropriate action to minimise their effects.  
34  
35  
36  
37  
38  
39  
40  
41  
42  
43  
44  
45  
46  
47  
48  
49  
50  
51  
52  
53  
54  
55  
56  
57  
58  
59  
60

## 4 MEASUREMENTS AND EVALUATION

### 4.1 Time and Events Schedule

A flow chart showing the timing of trial procedures (Clinical and Laboratory) is shown in Table 1.

An initial pre-entry (screening) assessment for eligibility will be performed as soon as possible after the patient is admitted to the ICU. The patient should be randomised no later than 24 hours after the time of admission. Evaluations will then be carried out at entry (Day 1), and thereafter daily as long as the patients remains in the ICU. After discharge, the course of disease is collected in less detail and the survival status determined day 28, 60, 90 and 180 after enrolment in the trial.

#### 4.1.1 Pre-entry Evaluations

The site must obtain subject consent in the form of a written informed consent form prior to the initiation of **any** pre-entry procedures as outlined in this protocol. The consent form must be approved by the IEC of each participating site.

The pre-entry evaluation will be conducted the first day of the trial by an investigator in the ICU and will include an evaluation of whether the patient fulfils the requirements for enrolment in this trial (see section 3.2.2 and 3.2.3).

Subjects who fail to meet the entry criteria may not be re-screened for this protocol until 28 days after the failed pre-entry evaluation. Hence, enrolment of such patients will require that the patient is re-admitted to the ICU after at least 7 days outside of the ICU after the time of the first screening.

#### 4.1.2 Baseline (Day 1) Evaluations

The following evaluations should be performed at baseline (Day 1):

Note: For this trial, Baseline (Day 1) is defined as the day on which the subject has his/her first blood sample for PCT measurement. The following data are to be collected on day 1:

- Demography including date of birth, weight, height, and indication for admittance to the ICU
- Infections found in the subject in this hospital admission prior to admittance to the ICU.
- Present infection focus/ etiologic microorganism

- 1  
2  
3  
4  
5  
6  
7  
8  
9  
10  
11  
12  
13  
14  
15  
16  
17  
18  
19  
20  
21  
22  
23  
24  
25  
26  
27  
28  
29  
30  
31  
32  
33  
34  
35  
36  
37  
38  
39  
40  
41  
42  
43  
44  
45  
46  
47  
48  
49  
50  
51  
52  
53  
54  
55  
56  
57  
58  
59  
60
- APACHE II score (Temperature, Mean Arterial Pressure, Heart Rate, Respiratory Rate, FIO<sub>2</sub>, HCO<sub>3</sub><sup>-</sup>, pH (arterial), Se- Na<sup>+</sup>, K<sup>+</sup>, Creatinine, Haematocrite, White Blood Count+ differential count, Glasgow Coma Scale)
  - Current medical conditions
  - Pre-admittance daily function and health state:
 

|                      |                                                                                                                                                                                                                                                                                                              |
|----------------------|--------------------------------------------------------------------------------------------------------------------------------------------------------------------------------------------------------------------------------------------------------------------------------------------------------------|
| Professional career: | 1) Student, 2) Part time work, 3) Full time work,<br>4) Early retirement, 5) Retired                                                                                                                                                                                                                         |
| Health:              | 1) Congenital handicapped, 2) Acquired handicap,<br>3) Chronic disabling disease, 4) Chronic non-<br>disabling disease, 5) Healthy                                                                                                                                                                           |
| Self-supportance:    | 1) Lives in nursing home, 2) Lives in a flat<br>connected to a nursing home, 3) Own home with<br>external help ≥ once / day, 4) Own home with<br>external help < once daily, 5) Own home, no help<br>required                                                                                                |
| Hospital need:       | 1) ≥ 3 months admitted to a hospital/ last year, 2) 1-<br>3 months admitted to a hospital/ last year 3) 1-30<br>days admitted/ last year, 4) No admissions,<br>ambulatory visits ≥ 6/ last year, 5) No admissions,<br>ambulatory visits 1-5/ last year, 6) No admissions,<br>No ambulatory visits/ last year |
  - Adverse events/ other complications to treatment given in this hospital admission (ongoing clinical conditions at Day 1 shall be recorded in the “Adverse Event and Medical Condition Form” of the CRF at this time, regardless of the fact that such conditions may not subsequently be found to fulfil the definitions for an adverse event (see section 6.1))
  - Haematology: *haemoglobin, platelet count (WBC count mentioned as part of APACHE II)*
  - Clinical chemistry: Albumin, Bilirubin, Factor 2-7-9, Alanin Amino Transferase (ALAT)/ Aspartate Amino Transferase (ASAT), Alcaline Phosphatase, Creatinine, Carbamide, Na<sup>+</sup>, K<sup>+</sup>, Phosphate, Ca<sup>2+</sup>, C-reactive protein (some are also mentioned as part of APACHE II).

- Baseline PCT

The daily PCT determination is done real-time at the Department of Clinical Biochemical Department, Hvidovre Hospital, using the EC-approved measuring instruments and reagents. For each subject, the same methodology should be used throughout the trial period. The KRYPTOR® PCT BRAHMS sensitive assay is the accepted standard assay. Other licensed assays may be used instead if judged by the PASS steering committee to have a comparable performance compared to the indicated assay.

#### 4.2 On Trial Evaluations

On trial assessments will be completed at the following time-points unless otherwise specified:

While admitted to the ICU, the following information will be registered unless specified otherwise:

##### **Daily while patient is admitted to the ICU:**

- Clinical signs of new (nosocomial) infections
- Microbiological or radiological evidence of new (nosocomial) infection
- Defined Day Doses of antimicrobial chemotherapy
- APACHE II score (Temperature, Mean Arterial Pressure, Heart Rate, Respiratory Rate, FIO<sub>2</sub>, HCO<sub>3</sub><sup>-</sup>, pH (arterial), Se- Na<sup>+</sup>, K<sup>+</sup>, Creatinine, Haematocrite, White Blood Count+ differential count, Glasgow Coma Scale)
- Occurrence of sepsis, severe sepsis, septic shock, DIC. Assessment of Glasgow Coma Scale, measurement of Blood Pressure (systolic blood pressure < 90), days with artificial ventilation, Factor 2-7-9 < 0.7, creatinine (increase factor 3 from baseline), MODS.
- Adverse events/ other complications to treatment given in the ICU (ongoing clinical conditions at Day 1 shall be recorded in the “Adverse Event and Medical Condition Form” of the CRF at this time, regardless of the fact that such conditions may not subsequently be found to fulfil the definitions for an adverse event (see section 6.1))
- Haematology: haemoglobin, platelet count WBC (WBC count also mentioned as part of APACHE II)
- Clinical chemistry: Albumin, Bilirubin, Factor 2-7-9, Alanin Amino Transferase (ALAT)/ Aspartate Amino Transferase (ASAT), Alkaline Phosphatase, Creatinine, Carbamide, Na<sup>+</sup>, K<sup>+</sup>, Phosphate, Ca<sup>2+</sup>, C-reactive protein (some are also mentioned as part of APACHE II).

- Blood sample for PCT determination
- Diagnostic imaging procedures performed
- Non-routine microbiological sample taken
- Surgical procedures performed
- Change in antimicrobial chemotherapy

**At the day of discharge from ICU or day of death or later:**

- Mortality and time of death, and the cause hereof
- AUC<sub>Procalcitonin</sub> (at discharge from the ICU) (will remain blinded in the control arm)
- Discharge and post-discharge daily function and health state (obtained on day 30 and 180):

Professional career: 1) Student, 2) Part time work, 3) Full time work,  
4) Early retirement, 5) Retired

Health: 1) Congenital handicapped, 2) Acquired handicap,  
3) Chronic disabling disease, 4) Chronic non-  
disabling disease, 5) Healthy

Self-supportance: 1) Lives in nursing home, 2) Lives in a flat  
connected to a nursing home, 3) Own home with  
external help  $\geq$  once / day, 4) Own home with  
external help  $<$  once daily, 5) Own home, no help  
required.

Hospital need: 1)  $\geq$  3 months admitted to a hospital/ last year, 2) 1-  
3 months admitted to a hospital/ last year 3) 1-30  
days admitted/ last year, 4) No admissions,  
ambulatory visits  $\geq$  6/ last year, 5) No admissions,  
ambulatory visits 1-5/ last year, 6) No admissions,  
No ambulatory visits/ last year

**After discharge from ICU while patient is still admitted to hospital**

- Clinical signs of new (nosocomial) infections



- Microbiological or radiological evidence of new (nosocomial) infection
- Defined Day Doses of antimicrobial chemotherapy
- Current medical conditions (including acute organ failures)
- Diagnostic imaging procedures performed
- Surgical procedures performed
- Blood sample for PCT determination – done daily

### 4.3 Trial drugs

Drugs prescribed on basis of PCT levels and changes belong to following categories: Antibacterial chemotherapeutics and Antifungal chemotherapeutics. Drugs from these categories will also be prescribed for the control group (and in patients not included in the trial), when indicated from other findings than level/change of PCT. An exhaustive list of drugs, used in the participating ICU's (and thereby also in the trial subjects and controls) is given in appendix

#### 4.3.1 Dosing Details

The following details on dosing of all prescribed antimicrobials during the study period must be recorded in the "Medication form" in the CRF.

- Date of initial therapy
- Dose at each dosing change, together with reason for change
- Date of last dose of each agent
- Reason for discontinuation
- Date of resumption of therapy

#### 4.3.2 Collection of Blood Samples for Daily Analysis

Plasma from the PCT group and the control group will be collected early each morning (01.00 a.m.-06.00 a.m.) and will be transported to the Department of Clinical Microbiology Hvidovre Hospital, DK-2650 Hvidovre (or other laboratories, that can provide a PCT analysis real-time and with an analysing method which is approved by the PASS coordinating centre) and analysed immediately hereafter. The results from this analysis will be communicated via a

1  
2  
3 webbased cryptized licensed answering system every day to the Intensive Care Units for  
4 patients randomised to the PCT intervention arm or concealed for patients randomised to the  
5 control arm. Remaining material for the blood samples will hereafter be frozen for later analysis  
6 of other biochemical, biological and genetic markers (-80°C). Once the trial has been  
7 completed, the coupling of these samples to person-identifiers will be broken, and hence  
8 subsequent analyses done without any possibility to connect the results to individual persons  
9 involved in the trial. For detailed instructions regarding the collection, labelling, processing and  
10 transport of samples, see the Manual of Operational Procedures.

11  
12 It is the responsibility of the investigator (to be assisted by the courier service and PASS  
13 coordinating office) to ensure that all trial samples for transport are appropriately handled,  
14 packed and transported.

#### 23 24 **4.3.3 Genetic markers (PASS-sub-study)**

25  
26  
27 The PASS-sub-study has three aims: 1. quality assessment of the procalcitonin analyzes used  
28 in the PASS-Study, 2. to investigate the relation between levels of procalcitonin and other  
29 biomarkers and 3. to investigate if genetic markers can be used to gain an early knowledge of  
30 the course of critical illness.

31  
32  
33 To investigate this, we will use the remaining material from the blood samples collected for the  
34 PASS-Study. Blood plasma and DNA material will be frozen at minus 80 degrees Celcius. The  
35 PASS-Sub-study, therefore, will not mean any inconvenience for the study subjects and no  
36 additional blood sampling. This material will be kept in anonymous form for 5 years after the  
37 closure of the PASS-Study. Known hereditary diseases will not be examined.

38  
39  
40 Regarding 1.: In a randomly assigned set of blood samples, and additionally in samples that  
41 have shown extreme PCT values a double determination will be performed to assess the inter-  
42 assay variability.

43  
44  
45 Regarding 2.: Other biomarkers as interleukin-6 and soluble TNF- $\alpha$  receptor have been, and are  
46 still under assessment as predictive markers at sepsis and in other infectious diseases. In  
47 plasma, these and other markers will be analyzed after the closure of the PASS-Study to  
48 assess the value of these markers compared to PCT, also as prognostic markers.

49  
50  
51 Regarding 3.: Genetic polymorphisms (e.g. mannan-binding lectins, interleukins, complement,  
52 immunoglobulin receptor, Toll-like receptor 1-9, and Factor V Leiden) are related to the prognosis  
53 at sepsis and can, to some degree, identify patient groups with a high risk of a fatal course of  
54  
55  
56  
57  
58  
59  
60

the disease. An increasing number of international studies have during the latest years investigated the relation between the genetic disposition of patients and the course of infectious diseases, but often, these studies have been small and without sufficient statistical power to conclude on these issues.

The statistical power in investigating the relation between genetic polymorphisms and mortality in sepsis depends on the frequency of a certain allele, the mortality in the study population and the size of the population.

Directly applied on the study population of the PASS-Study with 1000 cases of sepsis (mortality ~25%) it will result in a 80 % statistical power to show a 2-fold increase in mortality for an allele that is found in 3% of the population. For alleles that are more frequent, we will be able to show less than a 2-fold increase in mortality. As an example of this, the homozygote forms of TNF- $\alpha$ , IL-1 $\beta$ , and PAI-1 have a frequency of 5, 7, and 14%, respectively. Heterozygote forms of TLR4 and factor V Leiden have a frequency of 9 and 7%.

## 5 DATA ANALYSIS METHODS

### 5.1 Sample Size Determination

The trial will randomise (1:1) 1,000 subjects into two treatment arms:

- 1: Control arm
- 2: The PCT guided intervention arm

With a sample size of 500 per group and an assumed mortality rate of 25% in the control group and 17.5 % in the PCT group there will be 80% probability that a negative result (Confirming the Null Hypothesis) is true. At the same time there will be < 5% probability of falsely declaring the alternative hypothesis correct. [Power 80%, stringency 5%]. Sample Size calculations via Dept. of Statistics, UCLA, California, USA.

### 5.2 General Considerations

#### 5.2.1 Analysis Populations

The primary population for analyses of the efficacy and safety data will be the intention to treat population, including all randomised subjects who have at least one blood sample made for PCT measurements.

Response to PCT guided diagnostic and therapeutic interventions will also be investigated descriptively by summary statistics for various sub-groups, e.g. gender, other demographic variables, Baseline APACHE II score, and pre-admittance health assessment.

### 5.2.2 Interim Analysis

Safety and efficacy data will be reviewed when 250, 500 and 750 subjects have completed the trial period (until discharge from the hospital or death, maximally 28 days), or at least every 6 th month, and assessments will be made by an independent Data and Safety Monitoring Board (DSMB). A cut-off date will be specified at this point and all treatment failure and adverse event data before this date will be used.

The Peto method of repeated significance testing will be used to test for treatment difference and a p-value of 0.001 will be used as the significance level at the interim analysis, giving a significance level of 0.05 for the final analysis once all patients have completed the trial.

Stopping the trial will not be based purely on a statistical decision but also on the recommendation of the DSMB.

### 5.2.3 Other Issues

All subjects will remain in the trial and be followed-up until day 180.

## 5.3 Efficacy

### 5.3.1 Primary Efficacy Endpoint

The primary efficacy analysis will be the comparison of the two treatment groups with respect to the incidence of mortality within 28 days after enrolment in the trial. Mortality is defined as all-cause mortality. Subjects not followed for the entire duration of the trial (i.e. lost to follow-up) will be counted as survivors. Very few patients will be lost to follow up for the primary endpoint, because of the Danish Central Person Register (CPR), where all deaths in Denmark are registered. Only subjects who permanently move their address to another country within 30 days after ICU admission can be lost to follow-up. The stratified log-rank test and Kaplan Meier estimates will be used.

### 5.3.2 Secondary Efficacy Endpoint(s)

#### 5.3.2.1 Other mortality assessments

The proportion of subjects, who survive to different points of time (at discharge, after 60, 90 and 180 days, counting after ICU admission). The log rank test and Kaplan-Meier estimates will be used. Differences in proportions of survivors will be assessed using the Mantel-Haenzel Chi Square test and Wilcoxon test. Subjects with missing mortality data will be classified as survivors.

### 5.3.2.2 Other parameters than mortality

- Defined day doses of antimicrobial therapy in each arm
- Occurrence of sepsis, severe sepsis, septic shock, DIC. Assessment of Glasgow Coma Scale, measurement of Blood Pressure (systolic blood pressure < 90), days with artificial ventilation, Factor 2-7-9 < 0.7, creatinine (increase factor 3 from baseline), MODS.
- SOFA score daily (Temperature, Mean Arterial Pressure, Heart Rate, Respiratory Rate, FIO<sub>2</sub>, HCO<sub>3</sub><sup>-</sup>, pH (arterial), Se- Na<sup>+</sup>, K<sup>+</sup>, Creatinine, Haematocrite, White Blood Count+ differential count, Glasgow Coma Scale).
- AUC<sub>Procalcitonin</sub> for the Procalcitonin-measuring group and for the control group.
- Number of diagnostic images after admission to the ICU.
- Number of non-routine microbiological sample taken after admittance to the ICU.
- Number of surgical procedures during the trial
- Time to the first change in antimicrobial chemotherapy after admittance to the ICU
- Occurrence of new clinically, microbiologically or radiologically diagnosed infections while admitted to the ICU
- Discharge and post-discharge daily function and health state

For endpoints that have normally distributed numbers, t-test will be used in assessment of statistical significance. If not normally distributed, Mantel-Haenzel Chi Square test and the Wilcoxon test, will be used.

Exploratory analysis of adjustments for possible confounders present at baseline for the analysis presented above will be performed using Cox proportional hazards and Logistic regression modelling (as appropriate).

### 5.3.3 Combined evaluation of mortality / occurrence of serious bacterial infection while admitted to the ICU

The proportion of patients who die during the trial period or who experience occurrence of a serious bacterial infection (sepsis, severe sepsis, septic shock, Disseminated Intravascular Coagulation (DIC) or Multi Organ Dysfunction Syndrome (MODS) (which ever came first) as a function of time since trial initiation. In this analysis, patients discontinuing the randomised treatment for other reasons before having failed in this analysis will be censored from the time of discontinuation.

#### 5.4 Safety

Adverse events will be tabulated by treatment group, maximum intensity, attributability to various antimicrobial agents and by seriousness. Treatment related adverse events that lead the subject to prematurely discontinue one or more of the originally prescribed antimicrobial agents will also be summarised.

Clinical chemistry and haematology results will be presented by summary statistics and quartile plots of measured results. Change from baseline for these results will also be presented.

Baseline is defined as the laboratory data collected at Day 1 (before the first blood sample for PCT analysis). Subjects must have both a baseline and an "on treatment" measurement to be included in the change from baseline analysis.

Treatment emergent toxicity grades will be presented for each graded laboratory parameter by treatment group. A graded toxicity is considered treatment emergent if it develops or increases in intensity, post Day 1. Treatments will include established and approved antimicrobial treatments, which are already used daily in the participating ICU's.

Concurrent medications and blood products will be summarised by randomised treatment group.

## 6 ADVERSE EVENTS (AE) AND SERIOUS ADVERSE EVENTS (SAE)

As mentioned other places in this protocol, the direct inconvenience for subjects in this study is sampling of 7 ml of whole blood daily in the same session as the routine blood samples are made, every morning. Therefore it is reasonable to expect that AE's and SAE's as a direct consequence of this blood sampling will not occur. Indirect AE's as a consequence of potential overly treatment are likewise not likely to occur according to the available literature on the issue, especially because the most striking result of the previously published RCT's is a reduction of antibiotic exposure in the PCT-guided group.

*All interventions, that are performed in this study are well-known, thoroughly tested and accepted treatments, so it does not seem reasonable to apply the same procedures for this study regarding AE's as e.g. a study where a new drug is to be assessed for safety (or effect)*

*Investigators will, however, have the opportunity to report events, that they find unexpected in the Case Report Form. In this part of the CRF, it is possible to classify unexpected events in groups of "relatedness" to the antimicrobial treatment as "no relation", "unlikely relation", "possibly related", "probably related" or "definitely related".*

### **Serious unexpected events or unexpected events**

Serious unexpected events and unexpected events, that can be related to the antimicrobial treatment will in both treatment groups be reported to the Danish Medicines Agency "Lægemiddelstyrelsen" according to the Danish legislation on this point

The primary and the secondary endpoints that are registered daily in the case report form are all *adverse events or serious adverse events, i.e. death, complications to sepsis, increased antibiotic exposition and prolonged hospital stay. These are registered routinely and daily in the part of the CRF dealing with effects of the treatments. All patients are at inclusion in the study threatened by potentially lethal illnesses.*

## **7 TRIAL ADMINISTRATION**

### **7.1 Data Collection**

Case Report Forms (CRF) will be provided for each subject by the PASS coordinating centre. All data on the CRFs must be entered legibly in black ink or typed, in Danish or English. Amendments and errors on the CRFs should not be erased, covered with correction fluid or completely crossed-out; rather, a single line should be drawn through the error and the correction initialled and dated by the investigator, authorised colleague or co-worker. An explanatory note for the change should also be written on the CRF. Any requested information which is not obtained or unanswerable should be identified by entering 'ND' (not done). An explanation must be documented for any missing data. CRFs must be completed regularly and should never bear the participant's name. Participants will be identified by initials, date of birth and subject trial number only.

The investigator (or a person appointed by the investigator) must sign and date a declaration on the CRF attesting to his/her responsibility for the quality of all data recorded and that the data represents a complete and accurate record of each subject's participation in the trial.

Details and procedures for the completion of the CRFs are specified in the Manual of Operational Procedures.

All trial CRFs will be plain paper copies – the original being the investigators copy. After completion of each page of the CRF, the investigator will send it by fax to the PASS coordinating centre. Pages will be reviewed and clarified in accordance with the protocol specific Review and Validation Manual. The data will be double entered (punched and verified) by separate data entry specialists to produce data files.



1  
2  
3 Identical validation checks will be performed on each database. Data failing any check will be  
4 flagged for output on a Data Clarification Report (DCR) and sent to the relevant investigator for  
5 resolution. In such cases the investigator is requested to sign and date any explanation or  
6 correction. On return, the database will be updated appropriately and the original DCR stored  
7 with the original CRF.  
8  
9

10  
11  
12 The database(s) will be subject to agreed Quality Control (QC) checks before authorisation. The  
13 data will be subsequently analysed according to the methods outlined in Section 5.  
14  
15

## 16 17 **7.2 Regulatory and Ethical Considerations**

### 18 19 **7.2.1 Regulatory Authority Approval**

20  
21 The co-ordinator (in collaboration with the PASS coordinating centre) will obtain approval from  
22 the appropriate regulatory agency prior to initiating the trial at a site.  
23  
24

25  
26 This trial will be conducted in accordance with ICH-GCP and all applicable regulations,  
27 including, where applicable, the Declaration of Helsinki, June 1964, as modified by 52nd WMA  
28 General Assembly, Edinburgh, Scotland, October 2000 (see Appendix 1).  
29  
30

### 31 32 **7.2.2 Ethics Approval**

33  
34 It is the investigator's responsibility to ensure that this protocol is reviewed and approved by the  
35 appropriate local Independent Ethics Committee (IEC). The IEC must also review and approve  
36 the site's informed consent form (ICF) and any other written information provided to the subject  
37 prior to any enrolment of subjects, and any advertisement that will be used for subject  
38 recruitment. The co-ordinator and/or the investigator must forward to the PASS coordinating  
39 centre copies of the IEC approval and the approved informed consent materials, which must be  
40 received by the PASS coordinating centre prior to the start of the trial.  
41  
42

43  
44 If, during the trial, it is necessary to amend either the protocol or the informed consent form, the  
45 co-ordinator and/or investigator will be responsible for ensuring the IEC reviews and approves  
46 these amended documents. IEC approval of the amended ICF must be obtained before new  
47 subjects consent to take part in the trial using this version of the form. Copies of the IEC  
48 approval of the amended ICF and the approved amended ICF must be forwarded to the PASS  
49 coordinating centre as soon as available.  
50  
51

### 52 53 **7.2.3 Subject Informed Consent**

54  
55 The investigator or his/her designee will inform the subject of all aspects pertaining to the  
56 subject's participation in the trial.  
57  
58



The process for obtaining subject informed consent will be in accordance with all applicable regulatory requirements. The investigator or his/her designee and the subject/ witness of an oral informed consent/ subjects legally acceptable representative must both sign and date the ICF before the subject can participate in the trial. Following types of informed consent can be accepted because of the nature of the ICU setting and the physical and/ or mental state of the subjects.

1) Ability to understand and provide written informed consent to participate in this trial,

or

2) Ability to understand and provide oral informed consent in presence of at least one impartial witness who should sign and personally date the consent form

or

3) The subjects legally acceptable representative can understand and provide written informed consent if the subject is not capable of this because of the present mental or physical condition of the subject.

The subject will receive a copy of the signed and dated form and the original will be retained in the site trial records. The decision regarding subject participation in the trial, that is made by the subject, is entirely voluntary. The investigator or his/her designee must emphasize to the subject that consent regarding trial participation may be withdrawn at any time without penalty or loss of benefits to which the subject is otherwise entitled.

If the ICF is amended during the trial, the investigator must follow all applicable regulatory requirements pertaining to approval of the amended ICF by the IEC and use of the amended form (including for ongoing subjects).

### 7.3 Trial Monitoring

In accordance with applicable regulations, good clinical practice (GCP), monitors will periodically contact the site, including conducting on-site visits. The extent, nature and frequency of on-site visits will be based on enrolment rate, the quality of the documents provided by the site, consistency of follow-up of the patients according to this protocol.

During these contacts, the monitor will:

- check and assess the progress of the trial

## Procalcitonin and Survival Study (PASS)

- review trial data collected
- conduct Source Document Verification
- identify any issues and address their resolution

This will be done in order to verify that the:

- data are authentic, accurate, and complete
- safety and rights of subjects are being protected
- trial is conducted in accordance with the currently approved protocol (and any amendments), GCP, and all applicable regulatory requirements

The investigator agrees to allow the monitor direct access to all relevant documents and to allocate his/her time and the time of his/her staff to the monitor to discuss findings and any relevant issues.

In addition to contacts during the trial, the monitor will also contact the site prior to the start of the trial to discuss the protocol and data collection procedures with site personnel.

At trial closure, monitors will also conduct all activities as indicated in Section 7.5, Trial and Site Closure.

#### **7.4 Quality Assurance**

At its discretion, the PASS coordinating centre may conduct a quality assurance audit of this trial. If such an audit occurs, the investigator agrees to allow the auditor direct access to all relevant documents and to allocate his/her time and the time of his/her staff to the auditor to discuss findings and any relevant issues. A guideline for audit is available at the PASS coordinating centre.

In addition, regulatory agencies may conduct a regulatory inspection of this trial. If such an inspection occurs, the investigator agrees to allow the inspector direct access to all relevant documents and to allocate his/her time and the time of his/her staff to the inspector to discuss findings and any relevant issues.

#### **7.5 Trial and Site Closure**

Upon completion of the trial, the following activities, when applicable, must be conducted by the monitor in conjunction with the investigator, as appropriate:

- return of all trial data to the PASS coordinating centre

- data clarifications and/or resolutions
- review of site trial records for completeness
- shipment of stored samples to assay laboratory

In addition, the steering committee reserves the right to temporarily suspend or prematurely discontinue this trial either at a single site or at all sites at any time and for any reason. If such action is taken, selected members of the PASS steering committee and/or the PASS coordinating centre will discuss this with the Investigator (including the reasons for taking such action) at that time. The PASS coordinating centre will promptly inform all other investigators conducting the trial if the trial is suspended or terminated for safety reasons. The investigators will inform their local/regional/national regulatory authorities (as appropriate) of the suspension or termination of the trial and the reason(s) for the action. If required by applicable regulations, the investigator must inform the IEC promptly and provide the reason for the suspension or termination.

If the trial is prematurely discontinued, all trial data must be returned to the PASS coordinating centre.

## 7.6 Records Retention

In accordance with applicable regulatory requirements, following closure of the trial, the investigator will maintain a copy of all site trial records in a safe and secure location. The PASS coordinating centre will inform the investigator of the time period for retaining these records in order to comply with applicable regulatory requirements.

## 7.7 Information Disclosure and Inventions

### 7.7.1 Confidentiality

The investigator and other trial site personnel will keep confidential any information provided by the co-ordinating centre (including this protocol) related to this trial and all data and records generated in the course of conducting the trial, and will not use the information, data, or records for any purpose other than conducting the trial. These restrictions do not apply to: (1) information which becomes publicly available through no fault of the investigator or trial site personnel; (2) information which it is necessary to disclose in confidence to an IEC solely for the evaluation of the trial; or (3) information which it is necessary to disclose in order to provide appropriate medical care to a trial subject.

### 7.7.2 Publication

The findings from this trial is intended to be published in peer-reviewed journals. The steering committee decides whether abstracts are to be submitted to conferences, and how the results are distributed if more than one manuscript is to be drafted.

**Authorship:** The trial group as a whole will appear in an appendix in all published manuscripts. Co-authors are selected after a fair evaluation of primarily number of patients entered in to the trial and the level of involvement in the drafting of the manuscript. Providing that several manuscripts are to be drafted, a fair rotation among the participating clinical sites of co-authorship slots will be done taking in to consideration the number of patients enrolled.

### 7.8 Indemnification and Compensation for Injury

The insurance that covers liability in relation to patient care in Denmark, *Patientforsikringen* will cover all liability aspects of the conduct of this trial<sup>45-46</sup>.

## 8. REFERENCES

- 1: Garnacho-Montero J, Garcia-Garmendia JL, Barrero-Almodovar A, Jimenez-Jimenez FJ, Perez-Paredes C, Ortiz-Leyba C. Impact of adequate empirical antibiotic therapy on the outcome of patients admitted to the intensive care unit with sepsis. *Crit Care Med* 2003;3:2742-51.
- 2: Alberti C, Brun-Buisson C, Burchardi H, Martin C, Goodman S, Artigas A, Sicignano A, Palazzo M, Moreno R, Boulme R, Lepage E, Le Gall R. Epidemiology of sepsis and infection in ICU patients from an international multicentre cohort study. *Intensive Care Med.* 2002 Feb;28(2):108-21. Epub 2001 Dec 04.
- 3: Alberti C, Brun-Buisson C, Goodman SV, et al. European Sepsis Group. Influence of systemic inflammatory response syndrome and sepsis on outcome of critically ill infected patients. *Am J Respir Crit Care Med* 2003;168:77-84. Epub 2003 Apr 17.
4. Azoulay E, Alberti C, Legendre I, Brun Buisson C, Le Gall JR. Post-ICU mortality in critically ill infected patients: an international study. *Intensive Care Med.* 2004 Nov 4; [Epub ahead of print]
5. Iapichino G, Morabito A, Mistraretti G, Ferla L, Radrizzani D, Reis Miranda D. Determinants of post-intensive care mortality in high-level treated critically ill patients. *Intensive Care Med.* 2003 Oct;29(10):1751-6. Epub 2003 Aug 16.
6. Moreno R, Miranda DR, Matos R, Feveireiro T. Mortality after discharge from intensive care: the impact of organ system failure and nursing workload use at discharge. *Intensive Care Med.* 2001 Jun;27(6):999-1004.
7. Azoulay E, Adrie C, De Lassence A, Pochard F, Moreau D, Thiery G, Cheval C, Moine P, Garrouste-Orgeas M, Alberti C, Cohen Y, Timsit JF. Determinants of postintensive care unit mortality: a prospective multicenter study. *Crit Care Med.* 2003 Feb;31(2):428-32.
- 8: Assicot M, Gendrel D, Carsin H, Raymond J, Guilbaud J, Bohuon C. High serum procalcitonin concentrations in patients with sepsis and infection. *Lancet* 1993;341:515-8.
9. Ittner L, Born W, Rau B, Steinbach G, Fischer JA. Circulating procalcitonin and cleavage products in septicaemia compared with medullary thyroid carcinoma. *Eur J Endocrinol.* 2002 Dec;147(6):727-31.
10. Redl H, Schlag G, Togel E, Assicot M, Bohuon C. Procalcitonin release patterns in a baboon model of trauma and sepsis: relationship to cytokines and neopterin. *Crit Care Med.* 2000 Nov;28(11):3659-63.
11. Nijsten MW, Olinga P, The TH, de Vries EG, Koops HS, Groothuis GM, Limburg PC, ten Duis HJ, Moshage H, Hoekstra HJ, Bijzet J, Zwaveling JH. Procalcitonin behaves as a fast responding acute phase protein in vivo and in vitro. *Crit Care Med.* 2000 Feb;28(2):458-61.
12. Chirouze C, Schuhmacher H, Rabaud C, Gil H, Khayat N, Estavoyer JM, May T, Hoen B. Low serum procalcitonin level accurately predicts the absence of bacteremia in adult patients with acute fever. *Clin Infect Dis.* 2002 Jul 15;35(2):156-61. Epub 2002 Jun 17.
13. Reny JL, Vuagnat A, Ract C, Benoit MO, Safar M, Fagon JY. Diagnosis and follow-up of infections in intensive care patients: value of C-reactive protein compared with other clinical and biological variables. *Crit Care Med.* 2002 Mar;30(3):529-35.
14. Balci C, Sungurtekin H, Gurses E, Sungurtekin U, Kaptanoglu B. Usefulness of procalcitonin for diagnosis of sepsis in the intensive care unit. *Crit Care.* 2003 Feb;7(1):85-90. Epub 2002 Oct 30.
15. Hatherill M, Tibby SM, Turner C, Ratnavel N, Murdoch IA. Procalcitonin and cytokine levels: relationship to organ failure and mortality in pediatric septic shock. *Crit Care Med.* 2000 Jul;28(7):2591-4.
16. Hatherill M, Tibby SM, Sykes K, Turner C, Murdoch IA. Diagnostic markers of infection: comparison of procalcitonin with C reactive protein and leucocyte count. *Arch Dis Child.* 1999 Nov;81(5):417-21.

- 1  
2  
3  
4  
5  
6  
7  
8  
9  
10  
11  
12  
13  
14  
15  
16  
17  
18  
19  
20  
21  
22  
23  
24  
25  
26  
27  
28  
29  
30  
31  
32  
33  
34  
35  
36  
37  
38  
39  
40  
41  
42  
43  
44  
45  
46  
47  
48  
49  
50  
51  
52  
53  
54  
55  
56  
57  
58  
59  
60
- 17: Meisner M, Rauschmayer C, Schmidt J, et al. Early increase of procalcitonin after cardiovascular surgery in patients with postoperative complications. *Intensive Care Med* 2002;28:1094-102. Epub 2002 Jul 06.
- 18: Adamik B, Kubler-Kielb J, Golebiowska B, Gamian A, Kubler A. Effect of sepsis and cardiac surgery with cardiopulmonary bypass on plasma level of nitric oxide metabolites, neopterin, and procalcitonin: correlation with mortality and postoperative complications. *Intensive Care Med* 2000;26:1259-67.
- 19: Lindberg M, Hole A, Johnsen H, et al. Reference intervals for procalcitonin and C-reactive protein after major abdominal surgery. *Scand J Clin Lab Invest* 2002;62:189-94.
- 21: Aouifi A, Piriou V, Blanc P, et al. Effect of cardiopulmonary bypass on serum procalcitonin and C-reactive protein concentrations. *Br J Anaesth.* 1999;83:602-7.
- 22: Conlon JM, Grimelius L, Thim L. Structural characterization of a high-molecular-mass form of calcitonin [procalcitonin-(60-116)-peptide] and its corresponding N-terminal flanking peptide [procalcitonin-(1-57)-peptide] in a human medullary thyroid carcinoma. *Biochem J* 1988;256:245-50.
- 23: Birnbaum RS, Mahoney WC, Burns DM, O'Neil JA, Miller RE, Roos BA. Identification of procalcitonin in a rat medullary thyroid carcinoma cell line. *J Biol Chem* 1984;259:2870-4.
- 24: Jacobs JW, Lund PK, Potts JT Jr, Bell NH, Habener JF. Procalcitonin is a glycoprotein. *J Biol Chem* 1981;256:2803-7.
- 25: Becker KL, Nylen ES, White JC, Muller B, Snider RH Jr. Clinical review 167: Procalcitonin and the calcitonin gene family of peptides in inflammation, infection, and sepsis: a journey from calcitonin back to its precursors. *J Clin Endocrinol Metab.* 2004 Apr;89(4):1512-25. Review. No abstract available.
- 26: Linscheid P, Seboek D, Nylen ES, Langer I, Schlatter M, Becker KL, Keller U, Muller B. In vitro and in vivo calcitonin I gene expression in parenchymal cells: a novel product of human adipose tissue. *Endocrinology.* 2003 Dec;144(12):5578-84. Epub 2003 Aug 21.
- 27: Linscheid P, Seboek D, Schaer DJ, Zulewski H, Keller U, Muller B. Expression and secretion of procalcitonin and calcitonin gene-related peptide by adherent monocytes and by macrophage-activated adipocytes. *Crit Care Med.* 2004 Aug;32(8):1715-21.
- 28: Meisner M, Muller V, Khakpour Z, Toegel E, Redl H. Induction of procalcitonin and proinflammatory cytokines in an anhepatic baboon endotoxin shock model. *Shock* 2003;19:187-90.
- 29: Dandona P, Nix D, Wilson MF, et al. Procalcitonin increase after endotoxin injection in normal subjects. *J Clin Endocrinol Metab* 1994;79:1605-8.
- 30: Christ-Crain M, Jaccard-Stolz D, Bingisser R, Gencay MM, Huber PR, Tamm M, Muller B. Effect of procalcitonin-guided treatment on antibiotic use and outcome in lower respiratory tract infections: cluster-randomised, single-blinded intervention trial. *Lancet.* 2004 Feb 21;363(9409):600-7.
- 31: Jensen J, Heslet L, Jensen TH, Espersen K, Steffensen P, Tvede M. Procalcitonin increase identifies critically ill patients at high risk of mortality. Submitted 26. January 2005.
- 32: Vesentini S, Bassi C, Talamini G, Cavallini G, Campedelli A, Pederzoli P. Prospective comparison of C-reactive protein level, Ranson score and contrast-enhanced computed tomography in the prediction of septic complications of acute pancreatitis. *Br J Surg* 1993;80:755-7.
- 33: Reny JL, Vuagnat A, Ract C, Benoit MO, Safar M, Fagon JY. Diagnosis and follow-up of infections in intensive care patients: value of C-reactive protein compared with other clinical and biological variables. *Crit Care Med* 2002;30:529-35.
34. Assay Characteristics, BRAHMS diagnostica, Hennigsdorf, Germany.
- 35: Meisner M, Lohs T, Huettemann E, Schmidt J, Hueller M, Reinhart K. The plasma elimination rate and urinary secretion of procalcitonin in patients with normal and impaired renal function. *Eur J Anaesthesiol.* 2001 feb;18(2):79-87.

- 1  
2  
3 36 Fleischhack G, Kambeck I, Cipic D, Hasan C, Bode U. Procalcitonin in paediatric cancer patients: its diagnostic  
4 relevance is superior to that of C-reactive protein, interleukin 6, interleukin 8, soluble interleukin 2 receptor and  
5 soluble tumour necrosis factor receptor II. *Br J Haematol*. 2000 Dec;111(4):1093-102.  
6  
7 37: von Lilienfeld-Toal M, Dietrich MP, Glasmacher A, Lehmann L, Breig P, Hahn C, Schmidt-Wolf IG, Marklein G,  
8 Schroeder S, Stuber F. Markers of bacteremia in febrile neutropenic patients with haematological malignancies:  
9 procalcitonin and IL-6 are more reliable than C-reactive protein. *Eur J Clin Microbiol Infect Dis*. 2004 Jul;23(7):  
10 539-44. Epub 2004 Jun 22.  
11  
12 38: Giamarellos-Bourboulis EJ, Grecka P, Poulakou G, Anargyrou K, Katsilambros N, Giamarellou H. Assessment  
13 of procalcitonin as a diagnostic marker of underlying infection in patients with febrile neutropenia. *Clin Infect Dis*.  
14 2001 Jun 15;32(12):1718-25. Epub 2001 May 21.  
15  
16 39: Persson L, Engervall P, Magnuson A, Vikerfors T, Soderquist B, Hansson LO, Tidefelt U. Use of inflammatory  
17 markers for early detection of bacteraemia in patients with febrile neutropenia. *Scand J Infect Dis*. 2004;36(5):365-  
18 71.  
19  
20 40: Giamarellou H, Giamarellos-Bourboulis EJ, Repoussis P, Galani L, Anagnostopoulos N, Grecka P, Lubos D,  
21 Aoun M, Athanassiou K, Bouza E, Devigili E, Krcmery V, Menichetti F, Panaretou E, Papageorgiou E, Plachouras  
22 D. Potential use of procalcitonin as a diagnostic criterion in febrile neutropenia: experience from a multicentre study.  
23 *Clin Microbiol Infect*. 2004 Jul;10(7):628-33.  
24  
25 41: Barnes C, Ignjatovic V, Newall F, Carlin J, Ng F, Hamilton S, Ashley D, Waters K, Monagle P. Change in serum  
26 procalcitonin (deltaPCT) predicts the clinical outcome of children admitted with febrile neutropenia. *Br J Haematol*.  
27 2002 Sep;118(4):1197-8. No abstract available.  
28  
29 42: Odamaki M, Kato A, Kumagai H, Hishida A. Counter-regulatory effects of procalcitonin and indoxyl sulphate on  
30 net albumin secretion by cultured rat hepatocytes. *Nephrol Dial Transplant*. 2004 Apr;19(4):797-804.  
31  
32 43: Nakae H, Inaba H, Endo S. Usefulness of procalcitonin in *Pseudomonas* burn wound sepsis model. *Tohoku J*  
33 *Exp Med*. 1999 Jul;188(3):271-3.  
34  
35 44: Holzheimer RG. Oral antibiotic prophylaxis can influence the inflammatory response in aortic aneurysm repair:  
36 results of a randomized clinical study. *J Chemother*. 2003 Apr;15(2):157-64.  
37  
38 45. Danish Law regulation 1997-03-24 nr. 228 about patient insurance  
39  
40 46. [www.patientforsikringen.dk](http://www.patientforsikringen.dk)  
41  
42  
43  
44  
45  
46  
47  
48  
49  
50  
51  
52  
53  
54  
55  
56  
57  
58  
59  
60



**Table 1: Clinical and laboratory Evaluations**

| Evaluation                                   | Day<br>(screening & baseline) |                              | Day (counting after admission<br>to ICU)<br>(follow-up) |    |    |    |     |
|----------------------------------------------|-------------------------------|------------------------------|---------------------------------------------------------|----|----|----|-----|
|                                              | 1                             | Day=Dis-<br>charge/<br>death | 28                                                      | 30 | 60 | 90 | 180 |
| Informed Consent                             | X                             |                              |                                                         |    |    |    |     |
| Entry Criteria                               | X                             |                              |                                                         |    |    |    |     |
| Demography                                   | X                             |                              |                                                         |    |    |    |     |
| APACHE II                                    | X                             | X                            |                                                         |    |    |    |     |
| Infections during this<br>hospital admission | X                             |                              |                                                         |    |    |    |     |
| Current medical conditions                   | X                             | X                            |                                                         |    |    |    |     |
| State of daily function and<br>health        | X                             |                              |                                                         | X  |    |    | X   |
| Mortality                                    |                               | (X)                          | X                                                       |    | X  | X  | X   |
| Baseline PCT                                 | X                             |                              |                                                         |    |    |    |     |
| AUC <sub>procalcitonin</sub>                 |                               | X                            |                                                         |    |    |    |     |
| Concurrent Medications <sup>a</sup>          | X                             | X                            |                                                         | X  | X  | X  | X   |
| Haematology                                  | X                             | X                            |                                                         |    |    |    |     |
| Clinical chemistry                           | X                             | X                            |                                                         |    |    |    |     |
| Adverse events                               | X <sup>a</sup>                | X                            |                                                         |    |    |    |     |
| Serious Adverse Events                       | X <sup>a</sup>                | X                            |                                                         | X  | X  | X  | X   |

a Adverse events and serious adverse events are registered daily



1  
2  
3  
4  
5  
6  
7  
8  
9  
10  
11  
12  
13  
14  
15  
16  
17  
18  
19  
20  
21  
22  
23  
24  
25  
26  
27  
28  
29  
30  
31  
32  
33  
34  
35  
36  
37  
38  
39  
40  
41  
42  
43  
44  
45  
46  
47  
48  
49  
50  
51  
52  
53  
54  
55  
56  
57  
58  
59  
60

For peer review only

## 9. APPENDICES

### Appendix 1

#### Declaration of Helsinki

### WORLD MEDICAL ASSOCIATION DECLARATION OF HELSINKI

#### Ethical Principles for Medical Research Involving Human Subjects

Adopted by the 18th WMA General Assembly

Helsinki, Finland, June 1964

and amended by the

29th WMA General Assembly, Tokyo, Japan, October 1975

35th WMA General Assembly, Venice, Italy, October 1983

41st WMA General Assembly, Hong Kong, September 1989

48th WMA General Assembly, Somerset West, Republic of South Africa, October 1996

and the

52nd WMA General Assembly, Edinburgh, Scotland, October 2000

#### A. INTRODUCTION

1. The World Medical Association has developed the Declaration of Helsinki as a statement of ethical principles to provide guidance to physicians and other participants in medical research involving human subjects. Medical research involving human subjects includes research on identifiable human material or identifiable data.
2. It is the duty of the physician to promote and safeguard the health of the people. The physician's knowledge and conscience are dedicated to the fulfillment of this duty.
3. The Declaration of Geneva of the World Medical Association binds the physician with the words, "The health of my patient will be my first consideration," and the International Code of Medical Ethics declares that, "A physician shall act only in the patient's interest when providing medical care which might have the effect of weakening the physical and mental condition of the patient."
4. Medical progress is based on research which ultimately must rest in part on experimentation involving human subjects.
5. In medical research on human subjects, considerations related to the well-being of the human subject should take precedence over the interests of science and society.
6. The primary purpose of medical research involving human subjects is to improve prophylactic, diagnostic and therapeutic procedures and the understanding of the aetiology and pathogenesis of disease. Even the best proven prophylactic, diagnostic, and therapeutic methods must continuously be challenged through research for their effectiveness, efficiency, accessibility and quality.
7. In current medical practice and in medical research, most prophylactic, diagnostic and therapeutic procedures involve risks and burdens.
8. Medical research is subject to ethical standards that promote respect for all human beings and protect their health and rights. Some research populations are vulnerable and need special protection. The particular needs of the economically and medically disadvantaged must be recognized. Special attention is also required for those who cannot give or refuse consent for themselves, for those who may be subject to giving consent under duress, for those who will not benefit personally from the research and for those for whom the research is combined with care.
9. Research Investigators should be aware of the ethical, legal and regulatory requirements for research on human subjects in their own countries as well as applicable international requirements. No national ethical, legal or regulatory requirement should be allowed to reduce or eliminate any of the protections for human subjects set forth in this Declaration.

**B. BASIC PRINCIPLES FOR ALL MEDICAL RESEARCH**

10. It is the duty of the physician in medical research to protect the life, health, privacy, and dignity of the human subject.
11. Medical research involving human subjects must conform to generally accepted scientific principles, be based on a thorough knowledge of the scientific literature, other relevant sources of information, and on adequate laboratory and, where appropriate, animal experimentation.
12. Appropriate caution must be exercised in the conduct of research which may affect the environment, and the welfare of animals used for research must be respected.
13. The design and performance of each experimental procedure involving human subjects should be clearly formulated in an experimental protocol. This protocol should be submitted for consideration, comment, guidance, and where appropriate, approval to a specially appointed ethical review committee, which must be independent of the investigator, the sponsor or any other kind of undue influence. This independent committee should be in conformity with the laws and regulations of the country in which the research experiment is performed. The committee has the right to monitor ongoing trials. The researcher has the obligation to provide monitoring information to the committee, especially any serious adverse events. The researcher should also submit to the committee, for review, information regarding funding, sponsors, institutional affiliations, other potential conflicts of interest and incentives for subjects.
14. The research protocol should always contain a statement of the ethical considerations involved and should indicate that there is compliance with the principles enunciated in this Declaration.
15. Medical research involving human subjects should be conducted only by scientifically qualified persons and under the supervision of a clinically competent medical person. The responsibility for the human subject must always rest with a medically qualified person and never rest on the subject of the research, even though the subject has given consent.
16. Every medical research project involving human subjects should be preceded by careful assessment of predictable risks and burdens in comparison with foreseeable benefits to the subject or to others. This does not preclude the participation of healthy volunteers in medical research. The design of all studies should be publicly available.
17. Physicians should abstain from engaging in research projects involving human subjects unless they are confident that the risks involved have been adequately assessed and can be satisfactorily managed. Physicians should cease any investigation if the risks are found to outweigh the potential benefits or if there is conclusive proof of positive and beneficial results.
18. Medical research involving human subjects should only be conducted if the importance of the objective outweighs the inherent risks and burdens to the subject. This is especially important when the human subjects are healthy volunteers.
19. Medical research is only justified if there is a reasonable likelihood that the populations in which the research is carried out stand to benefit from the results of the research.
20. The subjects must be volunteers and informed participants in the research project.
21. The right of research subjects to safeguard their integrity must always be respected. Every precaution should be taken to respect the privacy of the subject, the confidentiality of the patient's information and to minimize the impact of the study on the subject's physical and mental integrity and on the personality of the subject.
22. In any research on human beings, each potential subject must be adequately informed of the aims, methods, sources of funding, any possible conflicts of interest, institutional affiliations of the researcher, the anticipated benefits and potential risks of the study and the discomfort it may entail. The subject should be informed of the right to abstain from participation in the study or to withdraw consent to participate at any time without reprisal. After ensuring that the subject has understood the information, the physician should then obtain the subject's freely-given informed consent, preferably in writing. If the consent cannot be obtained in writing, the non-written consent must be formally documented and witnessed.
23. When obtaining informed consent for the research project the physician should be particularly cautious if the subject is in a dependent relationship with the physician or may consent under duress. In that case the informed consent should be obtained by a well-informed physician who is not engaged in the investigation and who is completely independent of this relationship.
24. For a research subject who is legally incompetent, physically or mentally incapable of giving consent or is a legally incompetent minor, the investigator must obtain

## Procalcitonin and Survival Study (PASS)

- 1  
2  
3 informed consent from the legally authorized  
4 representative in accordance with applicable law. These  
5 groups should not be included in research unless the  
6 research is necessary to promote the health of the  
7 population represented and this research cannot instead  
8 be performed on legally competent persons.  
9
- 10 25. When a subject deemed legally incompetent, such as a  
11 minor child, is able to give assent to decisions about  
12 participation in research, the investigator must obtain that  
13 assent in addition to the consent of the legally authorized  
14 representative.  
15
- 16 26. Research on individuals from whom it is not possible to  
17 obtain consent, including proxy or advance consent,  
18 should be done only if the physical/mental condition that  
19 prevents obtaining informed consent is a necessary  
20 characteristic of the research population. The specific  
21 reasons for involving research subjects with a condition  
22 that renders them unable to give informed consent should  
23 be stated in the experimental protocol for consideration  
24 and approval of the review committee. The protocol  
25 should state that consent to remain in the research  
26 should be obtained as soon as possible from the  
27 individual or a legally authorized surrogate.  
28
- 29 27. Both authors and publishers have ethical obligations. In  
30 publication of the results of research, the investigators are  
31 obliged to preserve the accuracy of the results. Negative  
32 as well as positive results should be published or  
33 otherwise publicly available. Sources of funding,  
34 institutional affiliations and any possible conflicts of  
35 interest should be declared in the publication. Reports of  
36 experimentation not in accordance with the principles laid  
37 down in this Declaration should not be accepted for  
38 publication.  
39  
40  
41  
42  
43  
44  
45  
46  
47  
48  
49  
50  
51  
52  
53  
54  
55  
56  
57  
58  
59  
60

**C. ADDITIONAL PRINCIPLES FOR MEDICAL RESEARCH COMBINED WITH MEDICAL CARE**

28. The physician may combine medical research with medical care, only to the extent that the research is justified by its potential prophylactic, diagnostic or therapeutic value. When medical research is combined with medical care, additional standards apply to protect the patients who are research subjects.
29. The benefits, risks, burdens and effectiveness of a new method should be tested against those of the best current prophylactic, diagnostic, and therapeutic methods. This does not exclude the use of placebo, or no treatment, in studies where no proven prophylactic, diagnostic or therapeutic method exists.
30. At the conclusion of the study, every patient entered into the study should be assured of access to the best proven prophylactic, diagnostic and therapeutic methods identified by the study.
31. The physician should fully inform the patient which aspects of the care are related to the research. The refusal of a patient to participate in a study must never interfere with the patient-physician relationship.
32. In the treatment of a patient, where proven prophylactic, diagnostic and therapeutic methods do not exist or have been ineffective, the physician, with informed consent from the patient, must be free to use unproven or new prophylactic, diagnostic and therapeutic measures, if in the physician's judgement it offers hope of saving life, re-establishing health or alleviating suffering. Where possible, these measures should be made the object of research, designed to evaluate their safety and efficacy. In all cases, new information should be recorded and, where appropriate, published. The other relevant guidelines of this Declaration should be followed.

## Appendix 2: Abbreviations

|    |                               |                                                          |
|----|-------------------------------|----------------------------------------------------------|
| 1  |                               |                                                          |
| 2  |                               |                                                          |
| 3  |                               |                                                          |
| 4  |                               |                                                          |
| 5  |                               |                                                          |
| 6  |                               |                                                          |
| 7  | <b>AE</b>                     | <b>Adverse Event (AE)</b>                                |
| 8  | <b>ALAT</b>                   | <b>Alanine Aminotransferase (SGOT)</b>                   |
| 9  |                               |                                                          |
| 10 | <b>APACHE II</b>              | <b>Acute Physiology And Chronic Health Evaluation II</b> |
| 11 |                               |                                                          |
| 12 | <b>ASAT</b>                   | <b>Aspartate Aminotransferase (SGPT)</b>                 |
| 13 |                               |                                                          |
| 14 | <b>CDC</b>                    | <b>Centers for Disease Control</b>                       |
| 15 | <b>CRF</b>                    | <b>Case Report Form</b>                                  |
| 16 |                               |                                                          |
| 17 | <b>DDD</b>                    | <b>Defined Day Doses</b>                                 |
| 18 | <b>DIC</b>                    | <b>Disseminated Intravascular Coagulation</b>            |
| 19 |                               |                                                          |
| 20 | <b>DSMB</b>                   | <b>Data Safety Monitoring Board</b>                      |
| 21 | <b>ICU</b>                    | <b>Intensive Care Unit</b>                               |
| 22 |                               |                                                          |
| 23 | <b>IEC</b>                    | <b>Independent Ethics Committee</b>                      |
| 24 |                               |                                                          |
| 25 |                               |                                                          |
| 26 | <b>IL-6</b>                   | <b>Interleukin 6</b>                                     |
| 27 |                               |                                                          |
| 28 | <b>MODS</b>                   | <b>Multi Organ Dysfunction Syndrome</b>                  |
| 29 |                               |                                                          |
| 30 |                               |                                                          |
| 31 | <b>PASS</b>                   | <b>Procalcitonin and Survival Study</b>                  |
| 32 | <b>PCT</b>                    | <b>Procalcitonin</b>                                     |
| 33 |                               |                                                          |
| 34 | <b>SAE</b>                    | <b>Serious Adverse Event</b>                             |
| 35 |                               |                                                          |
| 36 | <b>TNF<math>\alpha</math></b> | <b>Tumor Necrosis Factor <math>\alpha</math></b>         |
| 37 |                               |                                                          |
| 38 | <b>WBC</b>                    | <b>White Blood cell Count</b>                            |
| 39 |                               |                                                          |
| 40 |                               |                                                          |
| 41 |                               |                                                          |
| 42 |                               |                                                          |
| 43 |                               |                                                          |
| 44 |                               |                                                          |
| 45 |                               |                                                          |
| 46 |                               |                                                          |
| 47 |                               |                                                          |
| 48 |                               |                                                          |
| 49 |                               |                                                          |
| 50 |                               |                                                          |
| 51 |                               |                                                          |
| 52 |                               |                                                          |
| 53 |                               |                                                          |
| 54 |                               |                                                          |
| 55 |                               |                                                          |
| 56 |                               |                                                          |
| 57 |                               |                                                          |
| 58 |                               |                                                          |
| 59 |                               |                                                          |
| 60 |                               |                                                          |

**Appendix 3: Table of conversion factors for laboratory units**

| TEST                           | CONVENTIONAL         |        | SI                               |        |
|--------------------------------|----------------------|--------|----------------------------------|--------|
|                                | Unit                 | Factor | Unit                             | Factor |
| Haemoglobin                    | g/dl                 | 0,6206 | mmol/l                           | 1,61   |
| Platelets                      | Thou/mm <sup>3</sup> | 0,001  | <sup>a</sup> x10 <sup>9</sup> /l | 1000   |
| Hyponatraemia<br>(↓ Sodium)    | mEq/l                | 1,0    | mmol/l                           | 1,0    |
| Hypernatraemia<br>(↑ Sodium)   | mEq/l                | 1,0    | mmol/l                           | 1,0    |
| Hypokalaemia<br>(↓ Potassium)  | mEq/l                | 1,0    | mmol/l                           | 1,0    |
| Hyperkalaemia<br>(↑ Potassium) | mEq/l                | 1,0    | mmol/l                           | 1,0    |
| Hypoglycaemia<br>(↓ Glucose)   | mg/dl                | 0,0555 | mmol/l                           | 18,0   |
| Hyperglycaemia<br>(↑ Glucose)  | mg/dl                | 0,0555 | mmol/l                           | 18,0   |
| Hypocalcaemia<br>(↓ Calcium)   | mg/dl                | 0,2495 | mmol/l                           | 4,0    |
| Hypercalcaemia<br>(↑ Calcium)  | mg/dl                | 0,2495 | mmol/l                           | 4,0    |

<sup>a</sup> No SI unit

For example: Haemoglobin 9,5 g/dl - multiply by factor 0,6206 → 5,9 mmol/l

## Appendix 4: Table with the used antibacterial and antifungal drugs used in the 6 participating Intensive Care Units.

| Generic name                | Comercial name (s)                                                            |
|-----------------------------|-------------------------------------------------------------------------------|
| Benzyl-Penicillin           | Penicillin"Leo", Penicillin"Rosco" Benzyl-Penicillin"Panpharma"               |
| Phenoxymethyl-Penicillin    | Calcipen ®, Pancillin ®, Primcillin ®, Rocilin ®, Vepicombin ®"DAK"           |
| Dicloxacillin               | Dicillin ®, Diclocil ®                                                        |
| Flucloxacillin              | Heracillin                                                                    |
| Amoxicillin                 | Amoxicillin"NM", Flemoxin Solutab ®, Imacillin ®, Imadrax ®,                  |
| Amoxicillin+Clavulanic Acid | Bioclavid, Bioclavid Forte, Spektramox ®                                      |
| Ampicillin                  | Ampicillin"Vepidan", Doktacillin, Pentrexyl ®                                 |
| Piperacillin                | Ivacin ®, Pipril                                                              |
| Piperacillin+Tazobactam     | Tazocin ®                                                                     |
| Pivampicillin               | Pondocillin ®                                                                 |
| Pivmecillinam/ Mecillinam   | Selexid ®                                                                     |
| Cefalexin                   | Keflex ®                                                                      |
| Cefalotin                   | Keflin ®                                                                      |
| Cefepim                     | Maxipime ®                                                                    |
| Cefotaxim                   | Claforan ®                                                                    |
| Ceftazidim                  | Fortum ®                                                                      |
| Ceftriaxon                  | Rocephalin ®                                                                  |
| Cefuroxim                   | Zinacef, Cefuroxim Stragen, Zinnat ®                                          |
| Aztreonam                   | Azactam ®                                                                     |
| Meropenem                   | Meronem ®                                                                     |
| Imipenem+cilastatin         | Tienam ®                                                                      |
| Azithromycin                | Zitromax ®                                                                    |
| Clarithromycin              | Klacid ®, Klacid ® Uno, Klaricid, Zeclar                                      |
| Erythromycin                | Abboticin ®, Abboticin ® Novum, Erycin ®, Escumycin, Hexabotin ®              |
| Roxithromycin               | Surlid ®, Forimycin ®, Roximstad, Roxithromycin"Copyfarm", Roxithromycin"UNP" |
| Doxycyclin                  | Vibradox ®                                                                    |
| Lymecyclin                  | Tetralysal ®                                                                  |
| Oxytetracyclin              | Oxytetral ®                                                                   |
| Tetracyclin                 | Tetracyclin"AL", Tetracyclin"DAK", Tetracyclin"SAD"                           |

|                              |                                                                                                                                                                                             |
|------------------------------|---------------------------------------------------------------------------------------------------------------------------------------------------------------------------------------------|
| Gentamicin                   | Garamycin ®, Gentacoll ®, Hexamycin, Septopal, Septopal Mini                                                                                                                                |
| Netilmicin                   | Netilyn                                                                                                                                                                                     |
| Tobramycin                   | Nebcina ®, Tobi ®                                                                                                                                                                           |
| Moxifloxacin                 | Avelox                                                                                                                                                                                      |
| Ciprofloxacin                | Ciproxin ®, Cifin, Ciprofloxacin“1A Farma”, Ciprofloxacin“2K Pharma”, Ciprofloxacin“Alpharma”, Ciprofloxacin“Biochemie”, Ciprofloxacin“Gea”, Ciprofloxacin“Ratiopharm”, Sancipro, Sibunar ® |
| Ofloxacin                    | Tarivid ®                                                                                                                                                                                   |
| Norfloxacin                  | Zoroxin ®                                                                                                                                                                                   |
| Methenamin                   | Haiprex                                                                                                                                                                                     |
| Nitrofurantoin               | Nitrofurantoin“DAK”, Nitrofurantoin“SAD”                                                                                                                                                    |
| Sulfamethizol                | Lucosil ®, Sulfametizol“SAD”, Sulfametizol“Ophtha”                                                                                                                                          |
| Trimethoprim                 | Monotrim ®, Trimethoprim“1A Farma”, Trimopan                                                                                                                                                |
| Sulfamethoxazol+Trimethoprim | Sulfamethoxazol+Trimethoprim“SAD”, Sulfotrim ®                                                                                                                                              |
| Clindamycin                  | Dalacin ®                                                                                                                                                                                   |
| Colistin                     | Colimycin                                                                                                                                                                                   |
| Teicoplanin                  | Targocid ®                                                                                                                                                                                  |
| Vancomycin                   | Vancocin, Vancomycin“Abbott”, Vancomycin“Alpharma”                                                                                                                                          |
| Fusidinsyre                  | Fucidin ®                                                                                                                                                                                   |
| Linezolid                    | Zyvoxid ®                                                                                                                                                                                   |
| Metronidazol                 | Flagyl ®, Metronidazol“Alpharma”, Metronidazol“DAK”, Metronidazol“SAD”                                                                                                                      |
| Amphotericin B               | Abelcet, AmBisome, Fungizone                                                                                                                                                                |
| Caspofungin                  | Cancidas ®                                                                                                                                                                                  |
| Fluconazol                   | Conasol, Diflucan ®, Fluconazol“Alpharma”, Fluconazol“Copyfarm”, Fluconazol“Nycomed”, Fluconazol“Ratiopharm”, Fluconazol“Stada”, Fungal ®, Fungustatin                                      |
| Flucytosin                   | Ancotil                                                                                                                                                                                     |
| Ketoconazol                  | Nizoral ®                                                                                                                                                                                   |
| Voriconazol                  | Vfend                                                                                                                                                                                       |
| Ethambutol                   | Myambutol ®                                                                                                                                                                                 |
| Isoniacid                    | Isoniacid“OBA”                                                                                                                                                                              |
| Pyrazinamid                  | Pyrazinamid“Medic”, Pyrazinamid“SAD”                                                                                                                                                        |
| Rifabutin                    | Rifabutin“Pharmacia”                                                                                                                                                                        |
| Rifampicin                   | Rimactan ®                                                                                                                                                                                  |



**PASS-II**

25<sup>th</sup> Aug 2010

**Antibiotics and Renal Organ Failure – secondary endpoints from the Procalcitonin And Survival Study - analysis plan**

**1. Consort Flow Diagram (done in PASS-1)**



Trial profile.

**2. Baseline characteristics**

Table 1: Baseline characteristics

|                                                                  | Standard-of-care-only | Procalcitonin-guided | Overall          |
|------------------------------------------------------------------|-----------------------|----------------------|------------------|
|                                                                  | <u>n=596</u>          | <u>n=604</u>         | <u>n=1200</u>    |
| Age (Yr.) Median (IQR)                                           | 67 (58–75)            | 67 (58–76)           | 67 (58–76)       |
| Male sex – no. (%)                                               | 333 (55.9%)           | 330 (54.6%)          | 663 (55.3%)      |
| Body Mass Index – Median kg/m <sup>2</sup> (IQR)                 | 24.7 (22.0–27.8)      | 25.0 (22.5–28.7)     | 24.8 (22.2–27.9) |
| APACHE II Score - Median (IQR)                                   | 18 (13–24)            | 18 (13–25)           | 18 (13–24)       |
| Surgical patient – no. (%)                                       | 260 (43.6)            | 227 (37.6)           | 487 (40.6)       |
| <b>Chronic co-morbidity* - no. (%)</b>                           |                       |                      |                  |
| No chronic co-morbidities                                        | 102 (17.1)            | 123 (20.4)           | 225 (18.8)       |
| 1 chronic co-morbidities                                         | 279 (46.8)            | 257 (42.6)           | 536 (44.7)       |
| 2 chronic co-morbidities                                         | 173 (29.0)            | 171 (28.3)           | 344 (28.7)       |
| ≥3 chronic co-morbidities                                        | 42 (7.1)              | 53 (8.8)             | 95 (7.9)         |
| <b>Acute illness/reason for admittance to ICU – no. (%)</b>      |                       |                      |                  |
| Central nervous system incl. Unconsciousness                     | 78 (13.1)             | 101 (16.7)           | 179 (14.9)       |
| Respiratory failure                                              | 422 (70.8)            | 410 (67.9)           | 832 (69.3)       |
| Circulatory failure                                              | 263 (44.1)            | 257 (42.6)           | 520 (43.3)       |
| Gastro-intestinal disease                                        | 128 (21.5)            | 96 (15.9)            | 224 (18.7)       |
| Renal disease                                                    | 81 (13.6)             | 103 (17.1)           | 184 (15.3)       |
| Post-operative complications                                     | 123 (20.6)            | 106 (17.6)           | 229 (19.1)       |
| Trauma                                                           | 113 (19.0)            | 106 (17.6)           | 219 (18.3)       |
| Other                                                            | 68 (11.4)             | 57 (9.4)             | 125 (10.4)       |
| <b>Indicators of severity</b>                                    |                       |                      |                  |
| Temperature, °C (median (IQR), n=1136)                           | 37.3 (36.3–38.1)      | 37.4 (36.4–38.3)     | 37.3 (36.3–38.2) |
| Mean arterial pressure, mmHg (median (IQR) n=1195)               | 71 (60–84)            | 72 (63–85)           | 71 (62–84)       |
| Heart frequency (median (IQR) n=1197)                            | 100 (82–116)          | 100 (84–117)         | 100 (83–117)     |
| Need for vasopressor/inotropic drug <sup>†</sup> (% , n=1200)    | 315 (52.9)            | 326 (53.4)           | 641 (53.4)       |
| PaO <sub>2</sub> /PaCO <sub>2</sub> ratio (median (IQR), n=1178) | 1.85 (1.27–2.62)      | 1.82 (1.29–2.53)     | 1.83 (1.28–2.59) |
| pH (median (IQR) n=1185)                                         | 7.29 (7.21–7.39)      | 7.29 (7.20–7.38)     | 7.29 (7.20–7.38) |
| Mechanical ventilation used (% , n=1200)                         | 401 (67.3%)           | 401 (66.4%)          | 802 (66.8%)      |
| Creatinine μmol/L (median (IQR) n=1167)                          | 119 (78–197)          | 119 (75–208)         | 119 (76–202)     |
| Dialysis required (% , n=1200)                                   | 88 (14.8%)            | 86 (14.2%)           | 174 (14.5)       |
| Bilirubin, μmol/L (median (IQR) n=1109)                          | 10 (6–17)             | 10 (5–18)            | 10 (5–17)        |
| <b>Infection, clinical assessment ‡ – no. (%)</b>                |                       |                      |                  |
| No infection                                                     | 118 (19.8)            | 86 (14.2)            | 204 (17.0)       |
| Localized infection or Sepsis                                    | 266 (44.6)            | 271 (44.9)           | 537 (44.8)       |
| Severe sepsis/ septic Shock                                      | 212 (35.6)            | 247 (40.9)           | 459 (38.3)       |
| <b>Site of infection § – no. (%)</b>                             |                       |                      |                  |
| CNS                                                              | 12 (2.0)              | 35 (5.8)             | 47 (3.9)         |
| Respiratory                                                      | 292 (50.0)            | 324 (53.6)           | 616 (51.3)       |
| Gastrointestinal                                                 | 149 (25.0)            | 145 (24.0)           | 294 (24.5)       |
| Urinary                                                          | 28 (4.7)              | 42 (7.0)             | 70 (5.8)         |
| Other                                                            | 52 (8.7)              | 41 (6.8)             | 93 (7.8)         |
| <b>Biomarkers</b>                                                |                       |                      |                  |
| Alert-PCT    – no. (%)                                           | 279 (47.0)            | 312 (51.7)           | 591 (49.4)       |
| Leukocytes, x10 <sup>9</sup> – median (IQR)                      | 13.0 (8.8–18.1)       | 12.4 (8.0–18.1)      | 12.8 (8.4–18.1)  |
| C-reactive protein, mg/L – median (IQR)                          | 152 (54–266)          | 161 (56–271)         | 157 (56–271)     |

1 Interquartile range (IQR). Acute Physiology and Chronic Health Evaluation II score (APACHE II) ranges from 0 to 71. \*Chronic co-  
2 morbidity: Earlier diagnosed via hospital admission: heart failure, lung disease, cancer, diabetes, alcohol abuse, chronic infection,  
3 neurological disease, renal diseases, liver disease, gastro-intestinal disease, autoimmune disease, cancer and psychiatric disorders.  
4 Acute illness: persons can have several. 'Other' includes liver disease, haemorrhage, haematological disease and poisoning.  
5 †Vasopressors/inotropic drugs are considered to be epinephrine, nor-epinephrine, dopamine and dobutamine. ‡ Infections were rated  
6 according to the ACCP/SCCM definitions; investigators were trained in using them. § Site of infection: patients can have more than  
7 one. ||Alert-PCT: Procalcitonin-level not decreasing by at least 10% from the previous day and above 1.0 ng/ml. If only one  
8 measurement is available: Absolute procalcitonin-level above 1.0 ng/ml.  
9  
10  
11

12 **Table 1. Baseline characteristics of the study participants.**  
13  
14  
15  
16  
17  
18  
19  
20  
21  
22  
23  
24  
25  
26  
27  
28  
29  
30  
31  
32  
33  
34  
35  
36  
37  
38  
39  
40  
41  
42  
43  
44  
45  
46  
47  
48  
49  
50  
51  
52  
53  
54  
55  
56  
57  
58  
59  
60

For peer review only

Table 2: Follow up characteristics

| Follow up measurement                                                                                                                                                                                                       | Control group<br>(N=596) | PCT-guided group<br>(N=604) | Overall<br>(n=1200) |
|-----------------------------------------------------------------------------------------------------------------------------------------------------------------------------------------------------------------------------|--------------------------|-----------------------------|---------------------|
| Patients followed and alive for 28 days (N., %)                                                                                                                                                                             |                          |                             |                     |
| Patients followed for 28 days (incl. those who died in the first 28 days)<br>(N., %)                                                                                                                                        |                          |                             |                     |
| Status at 28 days (n = ):<br>Alive<br>Dead                                                                                                                                                                                  |                          |                             |                     |
| Days spent in ICU      Median (IQR) (as in PASS-I)                                                                                                                                                                          |                          |                             |                     |
| Days spent in Danish hospital within 28 days      Median (IQR)                                                                                                                                                              |                          |                             |                     |
| Patients with a complete 28 day follow up for respiratory failure (mech. Vent., PaO <sub>2</sub> and FiO <sub>2</sub> )                                                                                                     |                          |                             |                     |
| Days followed within 28 days for respiratory failure (mech. Vent, PaO <sub>2</sub> and FiO <sub>2</sub> ) of total days in trial ((denom. = 604 x 28) this can be drawn from the admission list in combination w. database) |                          |                             |                     |
| Patients with 28 day follow up for renal failure (dialysis – same as prev.)                                                                                                                                                 |                          |                             |                     |
| Days followed within 28 days for renal failure ( <u>dialysis</u> ) of total days in trial (denominator = 604 x 28 and 596 x 28 days) (same as prev.)                                                                        |                          |                             |                     |
| Patients with 28 day follow up for renal failure (eGFR)                                                                                                                                                                     |                          |                             |                     |
| Days followed within 28 days for renal failure ( <u>eGFR</u> ) of total days in trial (denominator = 604 x 28 and 596 x 28 days)                                                                                            |                          |                             |                     |
| Patients with 28 day follow up for Platelets                                                                                                                                                                                |                          |                             |                     |
| Patients with 28 day follow up for Bilirubin                                                                                                                                                                                |                          |                             |                     |
| Patients with 28 day follow up for antibiotic consumption                                                                                                                                                                   |                          |                             |                     |

n\*s refers to the total number of patients who had follow up for 28 days.

**28-day follow up is: Follow up until death within 28 days OR until day 28. For respiratory failure follow up is done for all ICU admissions. For renal failure, follow up is done for all dialysis treatment (ICU+other dialysis competent hospital units) and for all creatinine and carbamide measurements performed within 28 days (ICU + non-ICU admissions). For platelets and bilirubin, follow up is done for all measurements performed within 28 days (ICU + non-ICU admissions)**

**STRATIFICATION (\*S) / test for interaction: (regarding the below analyses in Section 2 + 3)**

1. Age (limit initially 65 y, if significant interaction, more age groups)
2. APACHE II score (limit initially 20, if significant interaction, more APACHE II groups,
3. Site 1-9.
4. Severe Sepsis/septic Shock vs. Milder or No infection at Baseline
5. Calendar date of inclusion into PASS. Recruited: 9<sup>th</sup> Jan 2006 – 31<sup>st</sup> December 2007 (~430 patients) vs. 1<sup>st</sup> of Jan 2008 – 2<sup>nd</sup> of June 2009 (~770 patients).
6. Surgical patient / medical patient [Surgical = All patients with mark in Baseline “B6”, or “B12” or marked “Yes” in “L”]
7. Gender

## **SECTION 2. Exposure – Antibiotic usage**

Follow up: All patients were followed up regarding antibiotic consumption: 1) In the ICU in the primary PASS-CRF, 2) All ICU-surviving patients, not staying in the ICU for 28 days, were followed up for antibiotic consumption in the non-ICU, they were discharged to after ICU.

General: The aims of these analyses are to investigate the impact of performing PCT-guided empiric antibiotic interventions according to a progressive algorithm on the consumption of antibiotics. This is to be illustrated by analyses exploring 1) spectrum, 2) quantity and 3) duration of therapy in the two arms.

### **The aim is:**

- a) To investigate the difference in exposure in general to antibiotics in the two arms of the PASS trial and more specifically to broad-spectrum antibiotics.

### **This is done in the following analyses (PCT vs. Control):**

- 1) The total number of days within the 28 day follow-up period with any antibiotic treatment (or proportion of follow-up time): [Not done Yet]
- 2) The total consumption of any antibiotic in weight (grams within 28 days) [Not done Yet]
- 3) The total consumption per ICU day of any antimicrobial [DONE]
- 4) The total consumption of betalactam drugs active against most Extended Spectrum Beta-lactamases and wild-type *Pseudomonas aeruginosa* (a. Meropenem and other pseudomonas active carbapenems, OR b. Piperacillin/tazobactam OR c. 4.generation Cephalosporins). [or proportion of days in these treatments] [Not done Yet]
- 5) The total no. of days within the 28-day follow up period with treatment with any flour-quinolone (ciprofloxacin, moxifloxacin and others) [or proportion of days in these treatments] [Not done Yet]
- 6) The total no. of days within the 28-day follow up period with treatment with any glycopeptide (Vancomycin, Teicoplanin) [or proportion of days in these treatments] [Not done Yet]
- 7) The total no. of days within the 28-day follow up period with treatment with fluconazole [or proportion of days in these treatments] [Not done Yet]

### **Consumption of antimicrobials in the intensive care unit**

|                                                                       |                    |                    |                      |        |
|-----------------------------------------------------------------------|--------------------|--------------------|----------------------|--------|
| Length of antimicrobial treatment in ICU, days (median, IQR)          | 4 (3– 10)          | 6 (3– 11)          | -                    | 0.001  |
| Quantity of antimicrobials administered per ICU day (g) (median, IQR) | 6.7g (4.5g– 12.5g) | 8.6g (5.3g– 13.7g) | -                    | <0.001 |
| Number (%) ICU days spent with at least three antimicrobials          | 2721 (57.7%)       | 3570 (65.5%)       | -7.9% (-9.7%– -6.0%) | 0.002  |

\*Counted from the time of sampling. Only samples later to become positive. Cultures with coagulase negative staphylococci, corynebacteria and propionebacteria are not included. † Including localised infection, mild sepsis, severe sepsis and septic shock.

p-values for the number of days spent with each factor were generated by testing the proportion of intensive care days spent with each factor using non-parametric tests. ICU: Intensive care unit

**Table 3. Antibiotic consumption**

**Admission time within 28 days**

1. Number of days admitted to hospital within 28 days after recruitment. Median + IQR. (PCT vs. Control)

**Subgroup Analysis: Total use of Antimicrobial chemotherapy**

1. Total antibiotic prescription days (all AMCs received, where all AMCs are weighted equally and summed per day, e.g.:→ possible to have e.g. 30 prescription days in 10 days ICU)

**Table 3: Number of AMCs received per day (over all days)**

|                                     | PCT-arm | Control-arm | P-value |
|-------------------------------------|---------|-------------|---------|
| AMC total (N,. %)                   |         |             |         |
| Recruited 09/01/06 – 31/12/07       |         |             |         |
| Recruited 01/01/08 – 02/06/09       |         |             |         |
| Age <65 years                       |         |             |         |
| Age ≥65 years                       |         |             |         |
| APACHE II <20                       |         |             |         |
| APACHE II ≥20                       |         |             |         |
| Bispebjerg                          |         |             |         |
| Gentofte                            |         |             |         |
| Glostrup                            |         |             |         |
| Herlev                              |         |             |         |
| Hillerød                            |         |             |         |
| Hvidovre                            |         |             |         |
| Roskilde                            |         |             |         |
| Skejby                              |         |             |         |
| Århus                               |         |             |         |
| Severe Sepsis or septic shock at BL |         |             |         |
| Milder or no infection at BL        |         |             |         |
| Surgical patient                    |         |             |         |
| Non-surgical patient                |         |             |         |
| Gender                              |         |             |         |

**MICROBIOLOGY**

Follow up: All patients were followed up via the electronic registers at the microbiologic depts., who service the PASS-ICU's regarding all microbiologic samples performed from baseline and until 28 days after. Data have been merged in the PASS-database.

**Table 4:** Number of culture samples performed within 28-days from randomisation [Not done Yet – JU handles this]

| Intervention                   |                | PCT arm<br>N = | Control Arm<br>N = | P-value |
|--------------------------------|----------------|----------------|--------------------|---------|
| <b>Microbiology:</b>           | <b>N., (%)</b> |                |                    |         |
| <b>Blood Cultures</b>          | N. Yes, (%)    |                |                    |         |
| <b>Urine Cultures</b>          | N. Yes, (%)    |                |                    |         |
| <b>Airway Cultures</b>         | N. Yes, (%)    |                |                    |         |
| <b>Samples from other foci</b> | N. Yes, (%)    |                |                    |         |



## **SECTION 3a: Estimating the degree of Organ Failure (OF)**

Follow up: All patients were followed up regarding respiratory failure (mech. Vent + physiologic parameters) and renal failure at 1) the PASS-ICU where the patient was recruited in the primary PASS-crf, 2) regarding mech. Ventilation and physiologic parameters and renal failure at any other PASS-ICU within the 28 day period (when patients were discharged to such an ICU, 3) in the case that a patient was discharged within the 28 day period to a non-PASS ICU (seldom), follow up was made for mech. Vent. and physiologic parameters and renal failure in hospitals "Rigshospitalet" and "Bispebjerg", since only very few ICU days were spent at any other ICU within the 28 day period (48 days of approx 9900 days = approx 0.5%).

The purpose of these analyses is to explore in detail, the quantity of the occurrence of secondary endpoints in the PASS-trial, especially respiratory organ failure and renal organ failure.

Genuine hypothesis: High usage of broad spectrum antibiotics as used in the PASS trial, results in substantially reduced organ function (respiratory, renal and liver) and compromised coagulation and a likewise substantially increased time with manifest organ failure as defined clinically (need for organ support) AND biochemically/physiologically (measured objective parameters).

**NB: Analyzes are summarized in the table 5 below**

time)

### **A. Renal Failure:**

- a. Median/ Mean eGFR for day1 – day10
- b. Median/ Mean eGFR for day11 – day28
- c. Median/Mean eGFR for day1 – day28 (a+b) [eGFR on days in columns in a figure and AUC for the columns]
- d. Median/Mean Carbamide for day1- day10
- e. Median/ Mean Carbamide for day11 – day28
- f. Median/Mean Carbamide for day1 – day28 (a+b) [Carbamide level on days in columns in a figure and AUC for the columns]
- g. Median/Mean Platelet count for day 1-28 [[platelet on days in columns in a figure and AUC for the columns]
- h. Median/Mean Bilirubin [Bilirubin on days in columns in a figure and AUC for the columns]
- i. No. of days within 28 days with eGFR < 60 ml/min/1.73 m<sup>2</sup>
- j. No. of days within day1 – day10 with eGFR < 60 ml/min/1.73 m<sup>2</sup>
- k. No. of days within day1 – day10 with dialysis
- l. No. of days within day11 – day28 with dialysis
- m. No. of days within day1 – day28 with dialysis

C + F+ G + H are all part of one figure with 4 panels.

Explanations: A: Dialysis:

Patients are categorized on days with ND or NA as dialysis=0, since this means patient has been discharged to home. All admissions within 28 days have been drawn from the central hospital register (Green System) and all admissions at dialysis capable departments have been followed up with dialysis.

B: eGFR:

In the ICU, patients are categorized with a new eGFR every day (done in PASS).

Patients are categorized on the basis of their status of eGFR on the last day of ICU. This status is kept until a creatinine measurement is done (on which day the status is changed to a new eGFR). This status is then kept until the next time creatinine is measured – and so forth.

In this way every day from 1 – 28 is given an eGFR status.

**In summary, the same principle is used:** From day 1, the first time a creatinine is measured, a eGFR is calculated. Next time the patient has a creatinine measurement, the patient is re-categorized with a new eGFR. That eGFR is kept until the next creatinine measurement etc.

**Table 5. Prevalence and duration of organ failure and other severe disturbances (PCT vs. Control)**

|                                                                                                                                                                     | PCT arm<br>(n = ) | Control<br>Arm<br>(n = ) | P-<br>value |
|---------------------------------------------------------------------------------------------------------------------------------------------------------------------|-------------------|--------------------------|-------------|
| <b>Kidney Failure</b> mL/min/1.73 m <sup>2</sup> (N. days, % of total days):<br>Normal: GFR > 90<br>Mildly impaired: 60–89<br>Moderately/severely impaired: GFR <60 |                   |                          |             |
| <b>Kidney Failure</b> Median/ Mean eGFR for day1 – day10                                                                                                            |                   |                          |             |
| <b>Kidney Failure</b> Median/ Mean eGFR for day11 – day28                                                                                                           |                   |                          |             |
| <b>Kidney Failure</b> Median/Mean eGFR for day1 – day28 (a+b)                                                                                                       |                   |                          |             |
| <b>Kidney Failure</b> Median/Mean Carbamide for day1- day10                                                                                                         |                   |                          |             |
| <b>Kidney Failure</b> Median/ Mean Carbamide for day11 – day28                                                                                                      |                   |                          |             |
| <b>Kidney Failure</b> No. of days within 28 days with eGFR < 60 ml/min/1.73 m <sup>2</sup>                                                                          |                   |                          |             |
| <b>Kidney Failure</b> No. of days within day1 – day10 with eGFR < 60 ml/min/1.73 m <sup>2</sup>                                                                     |                   |                          |             |
| <b>Kidney Failure</b> No. of days within day1 – day10 with dialysis                                                                                                 |                   |                          |             |
| <b>Kidney Failure</b> No. of days within day11 – day28 with dialysis                                                                                                |                   |                          |             |
| <b>Kidney Failure</b> No. of days within day1 – day28 with dialysis                                                                                                 |                   |                          |             |

Table with summarized analyses.

## **SECTION 3b: Attempting to explain the reason for organ failure (if OF is confirmed in section 3a)**

## Antimicrobial toxic explanation

Genuine hypotheses:

- 1) High Exposure (at least 5 or at least 10 days) to a certain combination of antibiotics (Pip/Tazo+Cipro OR Meropenem + Cipro OR Pip/Tazo + Vanco OR Meropenem + Vanco) causes OF

For 2-6: Estimate accumulated risk for day 1, 2, 3 etc. separately in both PCT group and control group.

- 2) Treatment for more than 4 days with Pip/Tazo causes OF (also 10 days)
- 3) Treatment for more than 4 days with Ciprofloxacin causes OF (also 10 days)
- 4) Treatment for more than 4 days with Meropenem causes OF (also 10 days)
- 5) Treatment for more than 4 days with Vancomycin causes OF (also 10 days)
- 6) Treatment for more than 4 days with Cefuroxim causes OF (also 10 days)

For the below analyses two composite endpoints are used for the Pulmonary/renal OF:

- 1) **Organ failure endpoint A:** Clinical Organ Failure judgment: Endpoint=1 for any day with dialysis. If both are present, Endpoint=2. Results are presented as "Clinical Organ Failure Days"
- 2) **Organ failure endpoint B:** Objective Organ failure measures: Endpoint =1 for any day with eGFR <30, repeated with <60 ml/min/1,73 m<sup>2</sup>. "Objective Organ Failure Days"

Analyses:

### A. Objective Organ failure endpoint:

As above, 1) – 6).

- 1) Analyze the median "Objective Organ Failure Days" to occur from "P-T treatment day 5" until 10 days later (counting endpoints for next 10 days). Censor at death.
- 2) Analyze the median "Objective Organ Failure Days" to occur from "Meropenem treatment day 5" until 10 days later (counting endpoints for next 10 days). Censor at death

### B. Multiple Effects models:

Regarding renal dysfunction: Analyze renal recovery in eGFR progression per day on different drugs day 1-10 (Meropenem / Piperacillin-tazobactam / Ciprofloxacin / Cefuroxim), control for other known predictors of renal failure. Additionally after discontinuation of these drugs.

## Sensitivity analyzes: Cox or Logistic Regression ?

Endpoint: Binary endpoint. To be defined according to the median number of organ failure days within 10 days after exposure for 5 days.

Endpoint 1a: [ $>$ median number of “clinical organ failure days”]

Endpoint 1b: [ $>$ median number of “clinical organ failure days”+2 days]

Endpoint 2a: [ $>$ median number of “objective organ failure days”]

Endpoint 2b: [ $>$ median number of “objective organ failure days”+2 days]

Risk variables to be entered:

- a. Treatment for  $\geq 4$  days with Pip/tazo
- b. Treatment for  $\geq 4$  days with Meropenem
- c. Treatment for  $\geq 4$  days with Ciprofloxacin
- d. Treatment for  $\geq 4$  days with Vancomycin
- e. Treatment for  $\geq 4$  days with Pip/tazo + Ciprofloxacin (all 4 days)
- f. Treatment for  $\geq 4$  days with Meropenem + Ciprofloxacin (all 4 days)
- g. Treatment for  $\geq 4$  days with Pip/tazo + Vancomycin (all 4 days)
- h. Treatment for  $\geq 4$  days with Meropenem + Ciprofloxacin (all 4 days)
- i. Treatment for  $\geq 4$  days with Meropenem + Vancomycin (all 4 days)
- j. APACHE II  $\geq 20$
- k. Age  $\geq 65$
- l. Surgical patient
- m. Severe sepsis/septic shock

NB: Treatment count start days 1 – 13 (so 5 days complete on day 5 – 18).

Patients with pauses in the administration of  $\geq 1$  day  $\rightarrow$  exclude

Only count the first administration

Endpoints:

“Clinical Organ Failure Days” and “Objective Organ Failure Days” both as defined above

$\rightarrow$ Transformed to Binary endpoint:

Endpoint 1a: [ $>$ median number of “clinical organ failure days”]

Endpoint 2a: [ $>$ median number of “objective organ failure days”]

(as above in the sensitivity analysis)

1  
2 PASS-II, organ failure – authors,  
3 Forfattere  
4  
5 Chip: JU+JDL+LRN  
6  
7 KMA Hvh/Diacenter: BEL  
8  
9  
10 Glostrup: Mulige: Asger, Anne, Ditte  
11  
12 Hvh: Mulige: Peder C, Jesper, Morten  
13  
14 Herlev: Mulige: Peter, Hamid, Tina  
15  
16 Gentofte: Mulige: Thomas, Katrin  
17  
18 Hillerød: Mulige: Morten, Lars, Kristian A?  
19  
20  
21 Roskilde: Mulige : Niels-Erik  
22  
23 Århus: Mulige: Kim + Mads  
24  
25 Skejby: Mulige: Paul  
26  
27  
28  
29  
30  
31  
32  
33  
34  
35  
36  
37  
38  
39  
40  
41  
42  
43  
44  
45  
46  
47  
48  
49  
50  
51  
52  
53  
54  
55  
56  
57  
58  
59  
60

CONSORT 2010 checklist of information to include when reporting a randomised trial\*

| Section/Topic             | Item No | Checklist item                                                                                                                            | Reported on page No     |
|---------------------------|---------|-------------------------------------------------------------------------------------------------------------------------------------------|-------------------------|
| <b>Title and abstract</b> |         |                                                                                                                                           |                         |
|                           | 1a      | Identification as a randomised trial in the title                                                                                         | 1                       |
|                           | 1b      | Structured summary of trial design, methods, results, and conclusions (for specific guidance see CONSORT for abstracts <sup>21 31</sup> ) | 3                       |
| <b>Introduction</b>       |         |                                                                                                                                           |                         |
| Background and objectives | 2a      | Scientific background and explanation of rationale                                                                                        | 4                       |
|                           | 2b      | Specific objectives or hypotheses                                                                                                         | 4                       |
| <b>Methods</b>            |         |                                                                                                                                           |                         |
| Trial design              | 3a      | Description of trial design (such as parallel, factorial) including allocation ratio                                                      | 5                       |
|                           | 3b      | Important changes to methods after trial commencement (such as eligibility criteria), with reasons                                        | -                       |
| Participants              | 4a      | Eligibility criteria for participants                                                                                                     | 5                       |
|                           | 4b      | Settings and locations where the data were collected                                                                                      | 1,5,15                  |
| Interventions             | 5       | The interventions for each group with sufficient details to allow replication, including how and when they were actually administered     | 6 + fig. 2 + Diagram D1 |
| Outcomes                  | 6a      | Completely defined pre-specified primary and secondary outcome measures, including how and when they were assessed                        | 6-7                     |
|                           | 6b      | Any changes to trial outcomes after the trial commenced, with reasons                                                                     | -                       |
| Sample size               | 7a      | How sample size was determined                                                                                                            | 7-8                     |
|                           | 7b      | When applicable, explanation of any interim analyses and stopping guidelines                                                              | -                       |
| Randomisation:            |         |                                                                                                                                           |                         |
| Sequence generation       | 8a      | Method used to generate the random allocation sequence                                                                                    | 5                       |
|                           | 8b      | Type of randomisation; details of any restriction (such as blocking and block size)                                                       | 5                       |

| Section/Topic                                        | Item No | Checklist item                                                                                                                                                                              | Reported on page No        |
|------------------------------------------------------|---------|---------------------------------------------------------------------------------------------------------------------------------------------------------------------------------------------|----------------------------|
| Allocation concealment mechanism                     | 9       | Mechanism used to implement the random allocation sequence (such as sequentially numbered containers), describing any steps taken to conceal the sequence until interventions were assigned | 5                          |
| Implementation                                       | 10      | Who generated the random allocation sequence, who enrolled participants, and who assigned participants to interventions                                                                     | 6                          |
| Blinding                                             | 11a     | If done, who was blinded after assignment to interventions (for example, participants, care providers, those assessing outcomes) and how                                                    | 6                          |
|                                                      | 11b     | If relevant, description of the similarity of interventions                                                                                                                                 | 6                          |
| Statistical methods                                  | 12a     | Statistical methods used to compare groups for primary and secondary outcomes                                                                                                               | 6-7                        |
|                                                      | 12b     | Methods for additional analyses, such as subgroup analyses and adjusted analyses                                                                                                            | 6-7                        |
| <b>Results</b>                                       |         |                                                                                                                                                                                             |                            |
| Participant flow (a diagram is strongly recommended) | 13a     | For each group, the numbers of participants who were randomly assigned, received intended treatment, and were analysed for the primary outcome                                              | Figure 1 (CONSORT diagram) |
|                                                      | 13b     | For each group, losses and exclusions after randomisation, together with reasons                                                                                                            | Figure 1 (CONSORT diagram) |
| Recruitment                                          | 14a     | Dates defining the periods of recruitment and follow-up                                                                                                                                     | 8                          |
|                                                      | 14b     | Why the trial ended or was stopped                                                                                                                                                          | 8                          |
| Baseline data                                        | 15      | A table showing baseline demographic and clinical characteristics for each group                                                                                                            | Table 1                    |
| Numbers analysed                                     | 16      | For each group, number of participants (denominator) included in each analysis and whether the analysis was by original assigned groups                                                     | 8-9, table 3 +table 4      |
| Outcomes and estimation                              | 17a     | For each primary and secondary outcome, results for each group, and the estimated effect                                                                                                    |                            |

| Section/Topic            | Item No | Checklist item                                                                                                                            | Reported on page No             |
|--------------------------|---------|-------------------------------------------------------------------------------------------------------------------------------------------|---------------------------------|
|                          |         | size and its precision (such as 95% confidence interval)                                                                                  | 9-10 + table 2, 3, 4 + fig. 3+4 |
|                          | 17b     | For binary outcomes, presentation of both absolute and relative effect sizes is recommended                                               | Abstract + p.                   |
| Ancillary analyses       | 18      | Results of any other analyses performed, including subgroup analyses and adjusted analyses, distinguishing pre-specified from exploratory | Table 3, fig. 3+4, p 10.        |
| Harms                    | 19      | All important harms or unintended effects in each group (for specific guidance see CONSORT for harms <sup>28</sup> )                      | Table 3+4, p. 10-11, fig. 3+4   |
| <b>Discussion</b>        |         |                                                                                                                                           |                                 |
| Limitations              | 20      | Trial limitations, addressing sources of potential bias, imprecision, and, if relevant, multiplicity of analyses                          | 13                              |
| Generalisability         | 21      | Generalisability (external validity, applicability) of the trial findings                                                                 | 13                              |
| Interpretation           | 22      | Interpretation consistent with results, balancing benefits and harms, and considering other relevant evidence                             | 10-14                           |
| <b>Other information</b> |         |                                                                                                                                           |                                 |
| Registration             | 23      | Registration number and name of trial registry                                                                                            | 4-5                             |
| Protocol                 | 24      | Where the full trial protocol can be accessed, if available                                                                               | 5                               |
| Funding                  | 25      | Sources of funding and other support (such as supply of drugs), role of funders                                                           | 16                              |

\*We strongly recommend reading this statement in conjunction with the CONSORT 2010 Explanation and Elaboration<sup>13</sup> for important clarifications on all the items. If relevant, we also recommend reading CONSORT extensions for cluster randomised trials,<sup>11</sup> non-inferiority and equivalence trials,<sup>12</sup> non-pharmacological treatments,<sup>32</sup> herbal interventions,<sup>33</sup> and pragmatic trials.<sup>34</sup> Additional extensions are forthcoming: for those and for up to date references relevant to this checklist, see [www.consort-statement.org](http://www.consort-statement.org).



1  
2  
3 Kidney failure related to broad-spectrum antibiotics in critically ill  
4  
5  
6 patients: secondary end point results from a 1200 patient randomized trial  
7

8  
9 Corresponding author Jens-Ulrik Jensen, Copenhagen HIV Programme, The Panum Institute,  
10  
11 Faculty of Health Sciences, University of Copenhagen, Blegdamsvej 3B, DK-2200 Copenhagen N,  
12  
13 [juj@cphiv.dk](mailto:juj@cphiv.dk)

14  
15 Jens Ulrik Jensen *medical doctor*<sup>1,2</sup>, Lars Hein *anaesthetist*<sup>3,4</sup>, Bettina Lundgren *centre director*,  
16  
17 *hospital diagnostic centre*<sup>2,5</sup>, Morten Heiberg Bestle *anaesthetist*<sup>4</sup>, Thomas Mohr *anaesthetist*<sup>6</sup>,  
18  
19 Mads Holmen Andersen *anaesthetist*<sup>7</sup>, Klaus Julius Thornberg *anaesthetist*<sup>6</sup>, Jesper Løken  
20  
21 *anaesthetist*<sup>8</sup>, Morten Steensen *anaesthetist*<sup>8</sup>, Zoe Fox *biostatistician*<sup>1,9</sup>, Hamid Tousi *anaesthetist*<sup>10</sup>,  
22  
23 Peter Søre-Jensen *anaesthetist*<sup>10</sup>, Anne Øberg Lauritsen *anaesthetist*<sup>3</sup>, Ditte Gry Strange  
24  
25 *anaesthetist*<sup>3</sup>, Nanna Reiter *anaesthetist*<sup>11</sup>, Katrin Thormar *anaesthetist*<sup>6</sup>, Paul Christian Fjeldborg  
26  
27 *anaesthetist*<sup>7</sup>, Kim Michael Larsen *anaesthetist*<sup>12</sup>, Niels-Erik Drenck *anaesthetist*<sup>11</sup> Maria Egede  
28  
29 Johansen *junior research associate*<sup>1</sup>, Lene Ryom *junior research executive*<sup>1</sup>, Christian Østergaard  
30  
31 *senior research executive*<sup>2,13</sup>, Jesper Kjær *database manager*<sup>1</sup>, Jesper Grarup *administrative leader*  
32  
33 <sup>1</sup>, Jens D. Lundgren *professor of infectious diseases*<sup>1,14</sup> of the The Procalcitonin And Survival  
34  
35 Study (PASS) Group\*.  
36  
37

38  
39 <sup>1</sup>Copenhagen HIV Programme at the University of Copenhagen; <sup>2</sup>Department of Clinical  
40  
41 Microbiology at Copenhagen University Hospital Hvidovre; <sup>3</sup>Department of Anesthesia and  
42  
43 Intensive Care at Copenhagen University Hospital Glostrup; <sup>4</sup>Department of Anesthesia and  
44  
45 Intensive Care at Copenhagen University Hospital Hillerød; <sup>5</sup>Diagnostic Centre at Copenhagen  
46  
47 University Hospital Rigshospitalet; <sup>6</sup>Department of Anesthesia and Intensive Care at Copenhagen  
48  
49 University Hospital Gentofte; <sup>7</sup>Department of Anesthesia and Intensive Care at Aarhus University  
50  
51 Hospital in Skejby; <sup>8</sup>Department of Anesthesia and Intensive Care at Copenhagen University  
52  
53 Hospital Hvidovre; <sup>9</sup>Royal Free Hospital School of Medicine in London; <sup>10</sup>Department of  
54  
55  
56  
57  
58  
59  
60

1  
2  
3 Anesthesia and Intensive Care at Copenhagen University Hospital Herlev; <sup>11</sup>Department of  
4  
5 Anesthesia and Intensive Care at Copenhagen University Hospital in Roskilde; <sup>12</sup>Department of  
6  
7 Anesthesia and Intensive Care at Aarhus University Hospital in Aarhus; <sup>13</sup>Department of Clinical  
8  
9 Microbiology at Copenhagen University Hospital Herlev; <sup>14</sup>Department of Infectious Diseases at  
10  
11 Copenhagen University Hospital Rigshospitalet. All except<sup>9</sup> are from Denmark. <sup>9</sup> is from England.

12  
13  
14 \*Participating investigators are listed in the appendix.

15  
16 Running Title: Broad-Spectrum Antibiotics and Renal Failure in Critically Ill Patients

17  
18 Keywords: Antibiotics – Renal Failure – Sepsis – Intensive Care  
19

20  
21  
22 **Copyright:** The Corresponding Author has the right to grant on behalf of all authors and does grant  
23  
24 on behalf of all authors, an exclusive licence (or non exclusive for government employees) on a  
25  
26 worldwide basis to the BMJ Publishing Group Ltd and its licensees , to permit this article (if  
27  
28 accepted) to be published in BMJ editions and any other BMJPG products and to exploit all  
29  
30 subsidiary rights, as set out in our licence.  
31  
32  
33  
34  
35  
36  
37  
38  
39  
40  
41  
42  
43  
44  
45  
46  
47  
48  
49  
50  
51  
52  
53  
54  
55  
56  
57  
58  
59  
60

## Abstract

Objectives: To explore whether a strategy of more intensive antibiotic therapy leads to emergence or prolongation of renal failure in intensive care patients.

Design: Secondary analysis from a randomized antibiotic strategy trial (the PASS study). The randomized arms were conserved from the primary trial for the main analysis.

Setting: Nine mixed surgical/medical intensive care units across Denmark.

Participants: 1200 adult intensive care patients, 18+ years, expected to stay +24 hours. Exclusion criteria: Bilirubin >40 mg/dL. Triglycerides >1000 mg/dL, Increased risk from blood sampling, pregnant/breast feeding and psychiatric patients.

Interventions: Patients were randomized to: guideline-based therapy ('standard-exposure'-arm), or to guideline-based therapy supplemented with antibiotic escalation whenever procalcitonin increased on daily measurements ('high-exposure'-arm).

Main outcome measures: Primary endpoint: estimated GFR<60 ml/min/1.73 m<sup>2</sup>. Secondary endpoints: a) delta eGFR after starting/stopping a drug, b) RIFLE criterion *Risk* "R", *Injury* "I" and *Failure* "F". Analysis was by intention to treat.

Results: 28-day mortality was 31.8% and comparable (Jensen et al, CCM 2011). A total of 3672/7634 (48.1%) study days during follow-up in the 'high-exposure' vs. 3016/6949 (43.4%) in the 'standard-exposure'-arm were spent with eGFR <60 ml/min/1.73m<sup>2</sup>, p<0.001. In a multiple effects model, piperacillin/tazobactam was identified as causing the lowest rate of renal recovery of all antibiotics: 1.0 ml/min/1.73 m<sup>2</sup> per 24h while exposed to this drug [95% CI: 0.7 – 1.3 ml/min/1.73 m<sup>2</sup>/24h] vs. meropenem: 2.9 ml/min/1.73 m<sup>2</sup>/24h [2.5 – 3.3 ml/min/1.73 m<sup>2</sup>/24h]); after discontinuing piperacillin/tazobactam, the renal recovery rate increased: 2.7 ml/min/1.73 m<sup>2</sup> /24h [2.3 – 3.1 ml/min/1.73 m<sup>2</sup> /24h]). eGFR<60 ml/min/1.73m<sup>2</sup> in the two groups at entry and at last day of follow-up was 57% vs. 55% and 41% vs. 39%, resp.

1  
2  
3 Conclusions: Piperacillin/tazobactam was identified as a cause of delayed renal recovery in  
4  
5 critically ill patients. This nephrotoxicity was not observed when using other beta-lactam  
6  
7 antibiotics.  
8

9  
10 Trial registration ClinicalTrials.gov identifier: NCT00271752.  
11

## 12 13 14 **Introduction**

15  
16  
17 Frequent complications to sepsis are organ failure, especially respiratory failure and renal failure<sup>1-3</sup>.  
18  
19 Critically ill patients are more vulnerable to organ-related drug toxicities than less severely ill  
20  
21 patients<sup>4</sup>. Randomized trials assessing safety of broad-spectrum antibiotics in intensive care settings  
22  
23 are generally scarce, do not have sufficient statistical power for assessing organ failure endpoints,  
24  
25 and do often not include defined kidney organ failure endpoints<sup>5-7</sup>. Data on renal failure endpoints  
26  
27 are also sparse in the published trials from other patient populations, and since the absolute risk of  
28  
29 renal failure is low for these patients, analyses may likely have been underpowered<sup>8-12</sup>.  
30  
31

32  
33 To our knowledge, randomized trials comparing ‘high exposure’ vs. ‘standard exposure to  
34  
35 antibiotics’ and specifically addressing whether these interventions affect the occurrence and  
36  
37 duration of kidney failure have not been done before in intensive care settings.  
38

39  
40 In this secondary analysis from a randomized trial, the PASS study<sup>13</sup>, we aimed to explore whether  
41  
42 a strategy of more intensive antibiotic therapy leads to adverse renal outcomes within 28 days after  
43  
44 recruitment.  
45

46  
47 In our study population (and often in severely infected ICU patients), a bacterial hit has resulted in  
48  
49 acute onset renal failure, and this bacterial hit (and related organ failure) is often the reason for ICU  
50  
51 admittance. In such situations, with the correct treatment of the underlying infection, we expect  
52  
53 renal function to recover. “Lack of recovery” is a non-desirable situation, which may be very  
54  
55 serious for the patient. We wanted to explore this, and realizing, RIFLE/AKIN could not capture  
56  
57  
58  
59  
60

1  
2  
3 this, we have used  $eGFR < 60 \text{ ml/min/1.73 m}^2$  as the primary endpoint and examined this from  
4  
5 different angles ( $eGFR < 60 \text{ ml/min/1.73 m}^2$  at day 7, days with  $\text{ml/min/1.73 m}^2$ ). The multiple  
6  
7 effects model was built to capture actual estimates of renal function improvement using different  
8  
9 antibiotics and adjusting for other known or suspected causes of renal dysfunction.  
10  
11 Secondly, if renal failure was observed from the 'high exposure' approach, to identify one or  
12  
13 several of the antibiotics used in this trial as the cause of such a renal failure.  
14

## 15 16 **Methods**

### 17 18 **Trial design and participants**

19  
20 *PASS* is a multicentre randomized controlled trial in Denmark 2006-9 in 1200 adult critically ill  
21  
22 patients, expected to stay in one of the nine participating mixed medical/surgical intensive care  
23  
24 units  $\geq 24$  hours; the CONSORT trial diagram is displayed in supplementary figure 1. Patients were  
25  
26 randomized 1:1 either to treatment according to international guidelines: 'standard exposure arm',  
27  
28 or to same guidelines but supplemented with daily drug-escalation initiated upon procalcitonin  
29  
30 increases ('high exposure'-arm); 28-day mortality was 31.8% and comparable between the two  
31  
32 groups, as reported<sup>13</sup>.  
33  
34

35  
36 To be eligible, patients had to be  $\geq 18$  years, enrolled within 24 hours of admission to the intensive  
37  
38 care unit and have an expected intensive care-admission length of  $\geq 24$  hours. Patients with known  
39  
40 bilirubin  $> 40 \text{ mg/dL}$  and triglycerides  $> 1000 \text{ mg/dL}$  (not suspensive) were not eligible (interference  
41  
42 with procalcitonin measurements), as were patients who were judged to be at an increased risk from  
43  
44 blood sampling. The inclusion criteria were broad since infection is frequent and often causes  
45  
46 complications in the patient group and to increase the external validity of the results. The person or  
47  
48 next of kin gave informed consent. The study protocol was approved by the regional ethics  
49  
50 committees in Denmark (H-KF-272-753) and adheres to the Helsinki declaration, revised in Seoul  
51  
52 2008.  
53  
54  
55  
56  
57  
58  
59  
60

1  
2  
3 In the present analyses we explored presence and duration of renal failure as well as change in renal  
4 function during the observed time. Endpoints are defined in *statistical analysis* below. Patients  
5 were followed until day 28. The primary trial protocol and the analysis plan is available in the  
6 online supplement. Analysis was by intention to treat: NCT00271752.  
7  
8  
9

### 10 11 **Randomization and masking**

12  
13 Randomization was performed 1:1 using a computerized algorithm created by the database manager  
14 (JK) with concealed block-size, pre-stratified for site of recruitment, initial APACHE-II and age  
15 (entered in an encrypted screening form in a password protected website); investigators were  
16 masked to assignment before, but not after, randomization. All investigators were trained by the  
17 coordinating centre and had to register in an investigator-database. Investigators, treating physicians  
18 and the coordinator were unaware of outcomes during the study, as were they of all procalcitonin  
19 measurements in the 'standard exposure' (control)-group.  
20  
21  
22  
23  
24  
25  
26  
27  
28  
29  
30  
31

### 32 **Antibiotic therapy in the two arms**

33  
34 The investigators enrolled participants and assigned the 'high exposure group' participants to the  
35 intervention. In the 'standard exposure' group, the antimicrobial treatment was guided according to  
36 current clinical guidelines<sup>14</sup>, based on clinical assessment, microbiology and radiology among other  
37 parameters, as described elsewhere<sup>13</sup>  
38  
39  
40  
41  
42

43 In the 'high exposure' group, the use of antimicrobial interventions was guided by the same clinical  
44 guidelines as in the 'standard exposure' group to ascertain the best standard of care therapy for all  
45 patients, and additionally antimicrobial interventions were initiated whenever procalcitonin levels  
46 were not decreasing at a pre-defined pace (supplementary figure 2) and diagram D1 in the online  
47 supplement where a site-adjusted local guideline is displayed.  
48  
49  
50  
51  
52  
53  
54  
55  
56  
57  
58  
59  
60

### Measurements, data collection and follow-up

Blood samples for biomarker measurement were made daily in the intensive care unit, beginning immediately after randomization. The assay used was the Kryptor®-PCT. Organ failure and antibiotic exposure was followed up for until 28 days or death, as described<sup>13</sup>. Mortality was followed via the National Patient Register in which all deaths in Denmark are registered within 14 days. Good Clinical Practice guidelines were applied. The regional ethics board approved the protocol (H-KF-01-272-753).

### Statistical analysis

The primary endpoint was 'estimated GFR<60 ml/min/1.73 m<sup>2</sup>' and several analyses were made to explore this: 'days with estimated GFR<60 ml/min/1.73 m<sup>2</sup>', 'risk of estimated GFR<60 ml/min/1.73 m<sup>2</sup> on day 1-7'. Secondary endpoints were a) delta eGFR after starting/stopping a drug, b) RIFLE-criteria *Risk* 'R', *Injury* 'I' and *Failure* 'F' [www.adqi.net](http://www.adqi.net). Since we explored exposure of antibiotics from baseline and forth (and not pre-ICU), in the RIFLE definition, the baseline creatinine was used (instead of an ideal eGFR). eGFR was calculated for every day. To not let this be influenced by hydration status, the baseline weight was used, and thus the relation between se-creatinine and eGFR was a first degree function for every patient. Other endpoints explored were 'ever' blood-urea level  $\geq 20$  mmol/L and eGFR<30.

The multiple effects eGFR 'slope' analyses, were adjusted for the following variables: treatment arm ('high exposure' vs. 'standard exposure'), age ( $\geq 65$  vs. <65 years), gender, baseline APACHE II score ( $\geq 20$  vs. <20), degree of host response/infection at baseline (severe sepsis/septic shock vs. milder or no infection as defined<sup>15</sup>), the eGFR at initiation of the investigated antibiotic, and finally, whether the patient at baseline was considered to be 'surgical' or 'medical'.

Comparisons were made between treatment arms using Students t-tests (for normal distributed continuous data) and Mann-Whitney U-tests (for non-normally distributed continuous data). Chi-squared tests and logistic regression models were used to test categorical variables. Time-to-event

1  
2  
3 analyses comparing the 'high exposure' group with the 'standard exposure' group were performed  
4  
5 using Kaplan-Meier plots and Cox proportional hazards models. Interactions were explored  
6  
7 whenever an interaction could be rationally expected according to background literature, for the  
8  
9 multivariate models performed. Statistical analyses were performed using STATA Version 10.2,  
10  
11 and SAS version 9.1. All reported p-values are 2-sided using a level of significance of 0.05.  
12  
13

### 14 15 16 **Sample size**

17  
18 A multivariate approach power calculation was made: The summed squared correlations ( $\Sigma\rho^2$ ) to  
19  
20 the risk of the antibiotic drug investigated, was set to 0.3. The frequency of the endpoint in the  
21  
22 'standard exposure' group was set to 20%, the sample size was set to 1200, and the frequency of the  
23  
24 exposure was set at 30%, which resulted in a detection limit for odds ratio of  $\geq 1.5$  (or  $\leq 0.67$ ).  
25  
26  
27  
28  
29

## 30 **Results**

### 31 32 **Baseline characteristics**

33  
34 Nine sites included 1200 persons between 09/01/06 and 02/06/09. Eighty-three percent of the  
35  
36 patients were assessed by the investigator to have an infection at baseline and 81% of the patients  
37  
38 suffered from chronic co-morbidity. Supplementary table 1 briefly summarizes baseline  
39  
40 characteristics. Mortality was comparable between the two groups, as reported<sup>13</sup>.  
41  
42  
43  
44  
45

### 46 **Follow-up**

47  
48 Follow-up for renal measures during the 28-day study period was made on 9,348 days in the  
49  
50 'standard-exposure' group of 10,755 days alive and admitted to hospital (86.9%) vs. 9,866 of  
51  
52 11,380 days in the 'high exposure group' (86.7%). If time after discharge from hospital (where no  
53  
54 S-creatinine values were determined) until day 28 was included, the percentage of days with  
55  
56 assessment of renal failure was 71.2% (9,348/13,130 days) vs. 73.8% (9,866/13,377 days)."  
57  
58  
59  
60



### Use of Antibiotics

The antibiotics used most while admitted to the ICU were piperacillin/tazobactam, cefuroxim, meropenem and ciprofloxacin, and there was a substantial higher use of piperacillin/tazobactam and ciprofloxacin in the 'high exposure' arm (supplementary table 2). Vancomycin was used to a lesser extent in both groups and aminoglycosides and colistin were used rarely in both groups.

The median length of an antibiotic course was prolonged using the 'high exposure'-algorithm (6 days (IQR 3, 11) vs. 4 days (IQR 3, 10),  $p=0.004$ ).

### Renal failure in the originally randomized study arms

The % of days within day 1-28 with  $eGFR \leq 60$  ml/min/m<sup>2</sup> was 48% in the 'high exposure' arm vs. 43% in the 'standard exposure' arm,  $p<0.0001$ . Results in table 1 are estimated eGFR values, based on actual measured S-creatinine values; results regarding days with eGFR were comparable if using the 'last observation carried forward' approach (not shown). RIFLE-criterion 'R' occurred more often within day 1-28 in the 'high exposure' arm than the 'standard exposure' arm: 209 patients vs. 170 patients,  $p=0.02$ , as did blood urea levels exceeding 20 mmol/L: 253 (43.4%) vs. 217 (37.4%),  $p=0.04$ .

The frequency of renal failure on the last day of follow-up was comparable between the arms (table 2), underlining that the results depicted in table 1 reflect a temporary extension of duration of renal failure in the "high exposure group" and furthermore that this observation is not explained by premature discharge of renally incompetent patients in the 'standard exposure' arm.

### Glomerular Filtration Rate changes and exposure to certain antibiotics

Comparison of the eGFR of all patients (both study arms) for the first ten days after starting on the most frequently used betalactam antibiotics showed that the slowest recovery of renal function was

1  
2  
3 observed in patients on piperacillin/tazobactam as compared to patients on meropenem or  
4  
5 cefuroxim (figure 1). A multiple effects model investigating the eGFR regression coefficient  
6  
7 ('increase in eGFR') per day on these drugs confirmed that renal recovery was lowest in patients on  
8  
9 piperacillin/tazobactam (table 3). Of note, renal recovery seems to be low in patients exposed to  
10  
11 cefuroxim, but as displayed in fig. 1, this drug is given to patients with a relatively normal renal  
12  
13 function (leaving few possibilities for 'recovery').  
14

15  
16 For the first five days following discontinuation of these drugs, adjusting for the same variables,  
17  
18 eGFR increased at the highest rate in patients receiving piperacillin/tazobactam (table 3).  
19

20  
21 The frequency of  $eGFR < 60 \text{ ml/min/1.73 m}^2$  on day 7 (or at death or last follow-up day) in the trial  
22  
23 was  $523/1200 = 43.6\%$ . This endpoint was investigated in a forward censored ( $p < 0.1$ ) logistic  
24  
25 regression. Use of piperacillin/tazobactam and other frequently used beta-lactam drugs for at least  
26  
27 three days within these first seven days, as well as known and suspected predictors of renal failure  
28  
29 were explored in a multivariable logistic regression analysis. Five independent predictors of renal  
30  
31 failure on day 7 were identified: Age above 65 years, APACHE II score  $> 20$ , Charlson's co-  
32  
33 morbidity score  $\geq 2$ , estimated GFR at baseline and use of piperacillin/tazobactam for at least 3 days  
34  
35 within the first 7 days (table 4) Excluding all patients who died within the first seven days,  
36  
37 excluding all patients with invasive fungal infection on day 1-28, combining the betalactam  
38  
39 exposure with exposure to flour-quinolone exposure (data not shown) or 4) adding 'Alert-  
40  
41 procalcitonin' at baseline as a variable, did not alter the signal (data not shown). To validate the  
42  
43 endpoint as a predictor of mortality, a Cox regression was done; eGFR  $< 60 \text{ mL/min/1.73 m}^2$  on day  
44  
45 7 was found to be the strongest predictor of 'all cause mortality day 7-28' of all tested variables  
46  
47 (Table T1, supplementary material).  
48  
49  
50  
51

## 52 53 Discussion

### 54 55 Principal findings

56  
57  
58  
59  
60

1  
2  
3 We observed that the duration of renal failure is prolonged in critically ill patients randomized to  
4 receive high exposure to broad-spectrum antibiotics and escalated diagnostic work-up according to  
5 a biomarker-strategy, compared to patients randomized to receive standard care according to  
6 guidelines regarding use of antibiotics and diagnostics. This difference in renal function was mainly  
7 confined to a prolongation of existing renal dysfunction, since there was only a moderate, although  
8 significant, difference in de novo acute renal failure.  
9

10  
11 To our knowledge, this study provides the first clinical report to inform this critical issue within  
12 ICU medicine. Firstly, the study was a randomized, good clinical practice controlled trial with a  
13 high sample size for comparison of organ failure, and the patients' baseline characteristics in  
14 general and specifically regarding renal parameters, were comparable. Secondly, the rate of follow-  
15 up, although not complete for the entire period, was high and equal among the groups and the rate  
16 of renal failure on the last day of follow-up in the two groups was comparable. Thus, the observed  
17 increased risk of persistent renal failure in the "high-exposure group" is attributable to this  
18 intervention in some way.  
19

20  
21 The intervention consisted of an increased number of culture samples, a proposed initiative to do  
22 further diagnostic imaging (no observed difference) and a rapid and aggressive antibiotic escalation  
23 with certain drugs, which was documented to be of substantial extent (supplementary table 2). As a  
24 moderate increase in microbiologic sampling would not cause renal failure, and since there was no  
25 observed increase in diagnostic imaging, these interventions seems implausible reasons to explain  
26 the observations depicted in table 1.  
27

28  
29 This leaves us with the documented escalation in use of piperacillin/tazobactam and ciprofloxacin  
30 as possible explanations. Before concluding, that the observed renal dysfunction was caused  
31 directly by one (or both) of these drugs, we wanted to exclude the possibility that the results had  
32 appeared because of a derived effect of an increase in fungal infections. Fungal infections have been  
33 linked to broad-spectrum antibiotics<sup>16</sup>, and renal failure is a well-known complication to some  
34  
35  
36  
37  
38  
39  
40  
41  
42  
43  
44  
45  
46  
47  
48  
49  
50  
51  
52  
53  
54  
55  
56  
57  
58  
59  
60

1  
2  
3 antifungals<sup>17</sup>. However, excluding all patients with invasive fungal infections did not alter the  
4  
5 results.

6  
7 Based on these results, and after having excluded other potential explanations, we realized  
8  
9 that nephrotoxicity from piperacillin/tazobactam and/or ciprofloxacin was the most plausible  
10  
11 explanation of the observed renal dysfunction. To further substantiate this, several analyses were  
12  
13 conducted. A multiple effects model was built to examine the GFR in the days after administration  
14  
15 of different frequently used drugs. This model included the five most often administered antibiotics,  
16  
17 including piperacillin/tazobactam, meropenem, cefuroxim, ciprofloxacin and vancomycin along  
18  
19 with other known and suspected causes of renal failure. In this model, the use of  
20  
21 piperacillin/tazobactam was associated with a striking low rate of GFR-improvement, compared to  
22  
23 the other drugs investigated. Intriguingly, this adverse effect appears to be reversible, since patients  
24  
25 in whom, piperacillin/tazobactam was discontinued, had the fastest improvement in renal function  
26  
27 as compared with patients on other antibiotic courses. Several sensitivity analyses were performed  
28  
29 with findings consistent with this observation.  
30  
31  
32  
33  
34  
35

### 36 **Comparison with other studies**

37  
38 Although clinical evidence regarding renal failure according to use of piperacillin/tazobactam in  
39  
40 ICU patients has been limited, the influence of piperacillin on renal function has been investigated  
41  
42 in healthy volunteers in laboratory experiments. In a cross-over experiment, the influence on drug  
43  
44 clearance from concurrent administration of piperacillin and flucloxacillin was estimated<sup>18</sup>. The  
45  
46 authors observed that flucloxacillin clearance was reduced to 45% [90% CI: 40 – 50%] when  
47  
48 piperacillin was administered simultaneously, whereas piperacillin clearance was unaffected by  
49  
50 concurrent flucloxacillin administration. Time-clearance slope modeling identified competitive  
51  
52 inhibition of renal tubular secretion as the most likely explanation. Piperacillin-induced reduction of  
53  
54 imipenem clearance<sup>19</sup> and of tazobactam clearance has also been found<sup>20</sup>, and a high correlation  
55  
56  
57  
58  
59  
60

1  
2  
3 between creatinin clearance and piperacillin clearance has been documented<sup>21</sup>, and thus, it is  
4  
5 plausible that piperacillin specifically causes nephrotoxicity.  
6

7  
8 Additionally, the published randomized trials comparing piperacillin/tazobactam with other beta-  
9  
10 lactam drugs in intensive care unit settings are scarce, underpowered for assessment of renal failure  
11  
12 endpoints and do generally not address renal endpoints<sup>5-7</sup>. Trials from other settings: haematological  
13  
14 patients, diabetes patients, and surgical settings do generally not investigate renal failure endpoints,  
15  
16 and in the few (non-ICU) trials that do report kidney endpoints, the total frequency of these makes  
17  
18 the power to avoid type II error very low (diagram D2, online supplement).  
19

### 20 21 22 23 **Strengths and weaknesses of the study**

24  
25 Although our study is performed on analyses from a large randomized good clinical practice  
26  
27 controlled trial with a stringent methodology and a high level of follow-up, there are limitations that  
28  
29 deserve mentioning: First, follow-up for organ-related measures was not complete, although we  
30  
31 followed patients for all blood samples done in 1) the hospital, at which they were initially  
32  
33 recruited, 2) other hospitals in Denmark, where we had electronic access to blood samples.  
34  
35

36  
37 However, patients who continued to suffer from renal failure when discharged from hospital, were  
38  
39 out of reach for follow-up for their renal function. Of note, the fraction of patients with remaining  
40  
41 renal failure at time of discharge was comparable between the two groups (table 2), and hence it is  
42  
43 unlikely that this lack of ability to ascertain renal outcome contributed to our main findings.  
44  
45

46  
47 Second, eGFR may not be an accurate measure of creatinine clearance, as recently documented by  
48  
49 Martin et al.<sup>22</sup>. However, even though this measure is not accurate to describe the creatinine  
50  
51 clearance, changes in eGFR reflect changes in renal function, as validated, and is closely correlated  
52  
53 to outcome<sup>23</sup>. Additionally, since hydration can be a source of error, we used the baseline weight in  
54  
55

1  
2  
3 the eGFR equation. Additionally, we found that eGFR<60 ml/min/1.73 m<sup>2</sup> on day 7 is a strong  
4 independent predictor of mortality.  
5

6  
7 Third, the RIFLE criteria used as secondary endpoint measures are not suitable to detect renal  
8 failure from baseline and forth, since the reference is defined as the pre-morbid creatinine. Hence,  
9 renal failure caused by exposure to antibiotics beginning at baseline, will not necessarily be  
10 captured using these criteria. This was the reason for using these as secondary endpoints.  
11  
12

13  
14 ForthThird, the study was a post hoc analysis using a previously published trial as material. We  
15 have tried to compensate for this by writing a detailed analysis-plan based on the hypotheses, we  
16 wanted to test, before analysis. FifthThird, although the sample size was relatively large compared  
17 to most other randomized trials in this setting, the sample size for these secondary analyses were  
18 based on the assumption of 25% renal failure in the 'standard exposure group' and a relative risk of  
19 1.25 in the 'high exposure group'. The observed numbers were 21% and 1.22 which calls for a  
20 slightly higher sample size. However, the sample size needed to show the differences observed in  
21 the multivariable analyses was far smaller, and since these analyses confirmed the main findings,  
22 we do not think the results are due to chance.  
23  
24

25  
26  
27  
28  
29  
30  
31  
32  
33  
34  
35  
36  
37  
38  
39  
40  
41  
42  
43  
44  
45  
46  
47  
48  
49  
50  
51  
52  
53  
54  
55  
56  
57  
58  
59  
60

In this trial, for the first time ever to our knowledge, random allocation to high exposure to broad-spectrum antibiotics in the intensive care unit has been systematically applied according to a systematic algorithm and this resulted in prolongation of renal failure. The results were confirmed when excluding patients with fungal infections, and a multiple effects model revealed a particularly low renal recovery in patients while piperacillin/tazobactam was administered and a remarkable recovery when discontinuing this drug; a finding that was specific for this drug. Several other crude and adjusted models likewise confirmed the findings. Finally, the results from this trial are supported by human experimental studies.

## Conclusion

1  
2  
3 In conclusion, the use of piperacillin/tazobactam caused a delayed renal recovery in critically ill  
4 patients, and renal function improved after discontinuation of the drug. However, the study is not  
5 designed to investigate *de novo* emergence of renal failure, since the lowest renal function is at  
6  
7 baseline in most patients. ~~We cannot within the sample size and follow-up time of this trial~~The  
8  
9 study was not designed to establish whether the use of piperacillin/tazobactam or other of the  
10  
11 interventional drugs, in some cases causes persistent renal failure, and thus, further research to  
12  
13 explore this is warranted. We think this impact on renal function is more likely caused by a - at  
14  
15 least partially reversible - toxic effect on the renal tubule than by a lack of effect towards the  
16  
17 infection, since this drug is independently associated with a high chance of survival in other  
18  
19 infected populations<sup>8</sup>, and we must emphasize that our findings are strictly confined to critically ill  
20  
21 patients.  
22  
23  
24  
25  
26  
27  
28  
29

### Contributors

30  
31  
32 JUJ designed the study, made the data collection tools, monitored data collection for the whole trial,  
33  
34 wrote the statistical analysis plan, and drafted and the paper. He is guarantor. JUJ, ZF and JK  
35  
36 cleaned and analysed the data. JL, BL, LH, MHB, TM, MHA, KJT, JL, MS, HT, PS-J, AØL, DGS,  
37  
38 NR, KT, PCF, KML, NED, MEJ, LR, CØ, ZF, JK and JG made input study design, data collection  
39  
40 tools and analysis plan and on the manuscript. JUJ implemented the trial at the centers. All  
41  
42 members of the Procalcitonin And Survival Study (PASS) Group assisted in designing the trial.  
43  
44 The members of the PASS study group are as follows: Central Coordinating Centre - J.U. Jensen,  
45  
46 B. Lundgren, J. Grarup, M.L. Jakobsen, S. S. Reilev, M. Kofoed-Djursner, J. D. Lundgren;  
47  
48 Regional Coordinating Centres - Hvidovre - J. Løken, M. Steensen; Gentofte - T. Mohr, K.  
49  
50 Thornberg, K. Thormar; Hillerød - L.Hein, M. Bestle; Glostrup - D. Strange, A.Ø. Lauritsen;  
51  
52 Herlev - H. Tousi, P. Søre-Jensen; Roskilde - N. Reiter, N.E. Drenck; Skejby - M.H. Andersen, P.  
53  
54 Fjeldborg; Århus - K.M. Larsen; Data Management & Statistical Centre - Z. Fox, J. Kjær, D.  
55  
56  
57  
58  
59  
60

1  
2  
3 Kristensen; Procalcitonin Analysis & Logistics Centre - J.U.Jensen, B. Lundgren, M. B.  
4  
5 Rasmussen, C. S.v.Hallas, M. Zacho, J. Iversen, T. Leerbeck, M. Jeppesen, K.S. Hansen, K.B.  
6  
7 Jensen; Data and Safety Monitoring Board - H. Masur (Chair), J. Chastre, H. Schönheyder, C.  
8  
9 Pedersen; Clinical Microbiology Management – B. Lundgren, J. D. Knudsen, A. Friis-Møller, K.  
10  
11 Schønning, A. Lester, H. Westh, G. Lisby, J.K. Møller, B. Bruun, J.J. Christensen, C. Østergaard,  
12  
13 M. Arpi, K. Astvad, M.D. Bartels, J. Engberg, H. Fjeldsøe-Nielsen, U.S. Jensen; PASS Site Clinical  
14  
15 Investigators (numbers of recruited persons are in parentheses) - Glostrup (290) – L. Hein, T.  
16  
17 Mohr, D. G. Strange, P. L. Petersen, A. Ø. Lauritsen, S. Hougaard, T. Mantoni, L. Nebrich, A.  
18  
19 Bendtsen, L.H. Andersen, F. Bærentzen, Andreas Eversbusch, B. Bømler, R. Martusevicius, T.  
20  
21 Nielsen. P.M. Bådstøløkken, C. Maschmann, U. Grevstad, P. Hallas, A. Lindhardt, T. Galle, K.  
22  
23 Graeser, E. Hohwu-Christensen, P. Gregersen, H.C. Boesen, L.M. Pedersen, K. Thiesen, L.C.  
24  
25 Hallengreen, I. Rye, J. Cordtz, K.R. Madsen, P.R.C. Kirkegaard, L. Findsen, L.H. Nielsen, D.H.  
26  
27 Pedersen, J.H. Andersen, C. Albrechtsen, A. Jacobsen, T. Jansen, A.G. Jensen, H.H. Jørgensen, M.  
28  
29 Vazin; Gentofte (209) – L. Lipsius, K. Thornberg, J. Nielsen, K. Thormar, M. Skielboe, B. Thage,  
30  
31 C. Thoft, M. Uldbjerg, E. Anderlo, M. Engsig, F. Hani, R.B. Jacobsen. L. Mulla, U. Skram; Herlev  
32  
33 (154) – H. Tousi, P. Sjøe-Jensen, T. Waldau, T. Faber, B. Andersen, I. Gillesberg, A. Christensen,  
34  
35 C. Hartmann, R. Albret, D.S. Dinesen, K. Gani, M. Ibsen; Hvidovre (148) – J. Løken, M. Steensen,  
36  
37 J.A. Petersen, P. Carl, E. Gade, D. Solevad, C. Heiring, M. Jørgensen, K. Ekelund, A. Afshari, N.  
38  
39 Hammer, M. Bitsch, J.S. Hansen, C. Wamberg, T.D. Clausen, R. Winkel, J. Huusom, D.L. Buck, U.  
40  
41 Grevstad, E. Aasvang, K. Lenz, P. Mellado, H. Karacan, J. Hidestål, J. Høgagard, J. Højbjerg, J.  
42  
43 Højlund, M. Johansen, S. Strande; Hillerød (138) – M. Bestle, S. Hestad, M. Østergaard, N.  
44  
45 Wesche, S.A. Nielsen, H. Christensen, H. Blom, C.H. Jensen K. Nielsen, N.G. Holler, K.A.  
46  
47 Jeppesen; Århus-Skejby (94) – M.H. Andersen, P. Fjeldborg, A. Vestergaard, O. Viborg, C.D.  
48  
49 Rossau; Roskilde (90) – N. Reiter, M. Glæmose, M.B.Wranér, C.B. Thomsen, B. Rasmussen, C.  
50  
51 Lund-Rasmussen, B. Bech, K. Bjerregaard, L. Spliid, L.L.W. Nielsen, N.E. Drenck; Århus-Centre  
52  
53  
54  
55  
56  
57  
58  
59  
60



1  
2  
3 (63) – K.M. Larsen, M. Goldinger, D. Illum, C. Jessen, A. Christiansen, A. Berg, T. Elkmann,  
4  
5 J.A.K. Pedersen, M. Simonsen; Bispebjerg (14) H. Joensen, H. Alstrøm, C. Svane, A. Engquist.  
6  
7 Supported by grants from the Danish Research Council, The Lundbeck Foundation, Research  
8  
9 Foundation for the Capital Region of Denmark, The Toyota Foundation, Brahms diagnostica (un-  
10  
11 restricted grant), The Harboe Foundation, The A.P. Møller Foundation and the Idella Foundation.  
12  
13 None of these had any influence on the design or conduct of the study; collection, management,  
14  
15 analysis, and interpretation of the data; nor the preparation, or approval of the manuscript. All  
16  
17 authors had full access to all of the data in the study and conjointly take responsibility for the  
18  
19 integrity of the data and the accuracy of the data analysis.  
20  
21

### 22 23 **Funding**

24  
25 Supported by grants from the Danish Research Council, The Lundbeck Foundation, Research  
26  
27 Foundation for the Capital Region of Denmark, The Toyota Foundation, Brahms diagnostica (un-  
28  
29 restricted grant), The Harboe Foundation, The A.P. Møller Foundation and the Idella Foundation.  
30  
31 None of these had any influence on the design or conduct of the study; collection, management,  
32  
33 analysis, and interpretation of the data; nor the preparation, or approval of the manuscript.  
34  
35

### 36 37 **Competing interests**

38  
39 All authors have completed the Unified Competing Interest form at  
40  
41 [www.icmje.org/coi\\_disclosure.pdf](http://www.icmje.org/coi_disclosure.pdf) (available on request from the corresponding author) and declare  
42  
43 that the trial was funded mainly by the Danish State (Danish Research Council) and : all authors  
44  
45 state that they have no relationships with companies that might have an interest in the submitted  
46  
47 work in the previous 3 years; their spouses, partners, or children have no financial relationships that  
48  
49 may be relevant to the submitted work; and all authors have no non-financial interests that may be  
50  
51 relevant to the submitted work.  
52

### 53 54 **Ethical approval**

The study was approved by the ethics committee for Copenhagen and Frederiksberg community (now Ethics Committee for the Capitol Region): H-KF-01-272-753. Patient consent: We received written consent from the patient or the next of kin for trial inclusion.

### Data sharing

No additional data available.

### References

1. Levy MM, Macias WL, Vincent JL, Russell JA, Silva E, Trzaskoma B, et al. Early changes in organ function predict eventual survival in severe sepsis. *Crit Care Med*. 2005; **33**(10): 2194-201.
2. Jia X, Malhotra A, Saeed M, Mark RG, Talmor D. Risk factors for ARDS in patients receiving mechanical ventilation for > 48 h. *Chest*. 2008; **133**(4): 853-61.
3. Rubenfeld GD, Caldwell E, Peabody E, Weaver J, Martin DP, Neff M, et al. Incidence and outcomes of acute lung injury. *N Engl J Med*. 2005; **353**(16): 1685-93.
4. Kane-Gill SL, Jacobi J, Rothschild JM. Adverse drug events in intensive care units: risk factors, impact, and the role of team care. *Crit Care Med*. 2010; **38**(6 Suppl): S83-9.
5. Brun-Buisson C, Sollet JP, Schweich H, Briere S, Petit C. Treatment of ventilator-associated pneumonia with piperacillin-tazobactam/amikacin versus ceftazidime/amikacin: a multicenter, randomized controlled trial. VAP Study Group. *Clin Infect Dis*. 1998; **26**(2): 346-54.
6. Alvarez-Lerma F, Insausti-Ordenana J, Jorda-Marcos R, Maravi-Poma E, Torres-Marti A, Nava J, et al. Efficacy and tolerability of piperacillin/tazobactam versus ceftazidime in association with amikacin for treating nosocomial pneumonia in intensive care patients: a prospective randomized multicenter trial. *Intensive Care Med*. 2001; **27**(3): 493-502.
7. Marra F, Reynolds R, Stiver G, Bryce E, Sleigh K, Frighetto L, et al. Piperacillin/tazobactam versus imipenem: a double-blind, randomized formulary feasibility study at a major teaching hospital. *Diagn Microbiol Infect Dis*. 1998; **31**(2): 355-68.
8. Paul M, Yahav D, Bivas A, Fraser A, Leibovici L. Anti-pseudomonal beta-lactams for the initial, empirical, treatment of febrile neutropenia: comparison of beta-lactams. *Cochrane Database Syst Rev*. 2010; **11**: CD005197.
9. Reich G, Cornely OA, Sandherr M, Kubin T, Krause S, Einsele H, et al. Empirical antimicrobial monotherapy in patients after high-dose chemotherapy and autologous stem cell transplantation: a randomised, multicentre trial. *Br J Haematol*. 2005; **130**(2): 265-70.
10. Gomez L, Estrada C, Gomez I, Marquez M, Estany C, Marti JM, et al. Low-dose beta-lactam plus amikacin in febrile neutropenia: cefepime vs. piperacillin/tazobactam, a randomized trial. *Eur J Clin Microbiol Infect Dis*. 2010; **29**(4): 417-27.
11. Sato T, Kobayashi R, Yasuda K, Kaneda M, Iguchi A, Kobayashi K. A prospective, randomized study comparing cefozopran with piperacillin-tazobactam plus ceftazidime as empirical therapy for febrile neutropenia in children with hematological disorders. *Pediatr Blood Cancer*. 2008; **51**(6): 774-7.
12. Bow EJ, Rotstein C, Noskin GA, Laverdiere M, Schwarzer AP, Segal BH, et al. A randomized, open-label, multicenter comparative study of the efficacy and safety of piperacillin-tazobactam and cefepime for the empirical treatment of febrile neutropenic episodes in patients with hematologic malignancies. *Clin Infect Dis*. 2006; **43**(4): 447-59.

13. Jensen JU, Hein L, Lundgren B, Bestle MH, Mohr TT, Andersen MH, et al. Procalcitonin-guided interventions against infections to increase early appropriate antibiotics and improve survival in the intensive care unit: A randomized trial. *Crit Care Med*. 2011.
14. Dellinger RP, Levy MM, Carlet JM, Bion J, Parker MM, Jaeschke R, et al. Surviving Sepsis Campaign: international guidelines for management of severe sepsis and septic shock: 2008. *Crit Care Med*. 2008; **36**(1): 296-327.
15. Levy MM, Fink MP, Marshall JC, Abraham E, Angus D, Cook D, et al. 2001 SCCM/ESICM/ACCP/ATS/SIS International Sepsis Definitions Conference. *Crit Care Med*. 2003; **31**(4): 1250-6.
16. Hebert C, Villaran R, Tolentino J, Best L, Boonlayangoor S, Pitrak D, et al. Prior antimicrobial exposure and the risk for bloodstream infection with fluconazole-non-susceptible *Candida* strains. *Scand J Infect Dis*. 2010; **42**(6-7): 506-9.
17. Sorkine P, Nagar H, Weinbroum A, Setton A, Israilit E, Scarlatt A, et al. Administration of amphotericin B in lipid emulsion decreases nephrotoxicity: results of a prospective, randomized, controlled study in critically ill patients. *Crit Care Med*. 1996; **24**(8): 1311-5.
18. Landersdorfer CB, Kirkpatrick CM, Kinzig M, Bulitta JB, Holzgrabe U, Sorgel F. Inhibition of flucloxacillin tubular renal secretion by piperacillin. *Br J Clin Pharmacol*. 2008; **66**(5): 648-59.
19. Saitoh H, Oda M, Gytoku T, Kobayashi M, Fujisaki H, Sekikawa H. A beneficial interaction between imipenem and piperacillin possibly through their renal excretory process. *Biol Pharm Bull*. 2006; **29**(12): 2519-22.
20. Komuro M, Maeda T, Kakuo H, Matsushita H, Shimada J. Inhibition of the renal excretion of tazobactam by piperacillin. *J Antimicrob Chemother*. 1994; **34**(4): 555-64.
21. Aronoff GR, Sloan RS, Brier ME, Luft FC. The effect of piperacillin dose on elimination kinetics in renal impairment. *Eur J Clin Pharmacol*. 1983; **24**(4): 543-7.
22. Martin JH, Fay MF, Udy A, Roberts J, Kirkpatrick C, Ungerer J, et al. Pitfalls of using estimations of glomerular filtration rate in an intensive care population. *Intern Med J*. 2011.
23. Bagshaw SM, George C, Dinu I, Bellomo R. A multi-centre evaluation of the RIFLE criteria for early acute kidney injury in critically ill patients. *Nephrol Dial Transplant*. 2008; **23**(4): 1203-10.
