# Supplementary figures and images for: Kidney failure related to broad-spectrum antibiotics in critically ill patients: secondary end point results from a 1200 patient randomised trial
Source: PubMed Central journal article supplement — BMJ Open. 2012 Mar 11;2(2):e000635. doi: 10.1136/bmjopen-2011-000635 (PMC3307126; doi:10.1136/bmjopen-2011-000635), 2012-03-11

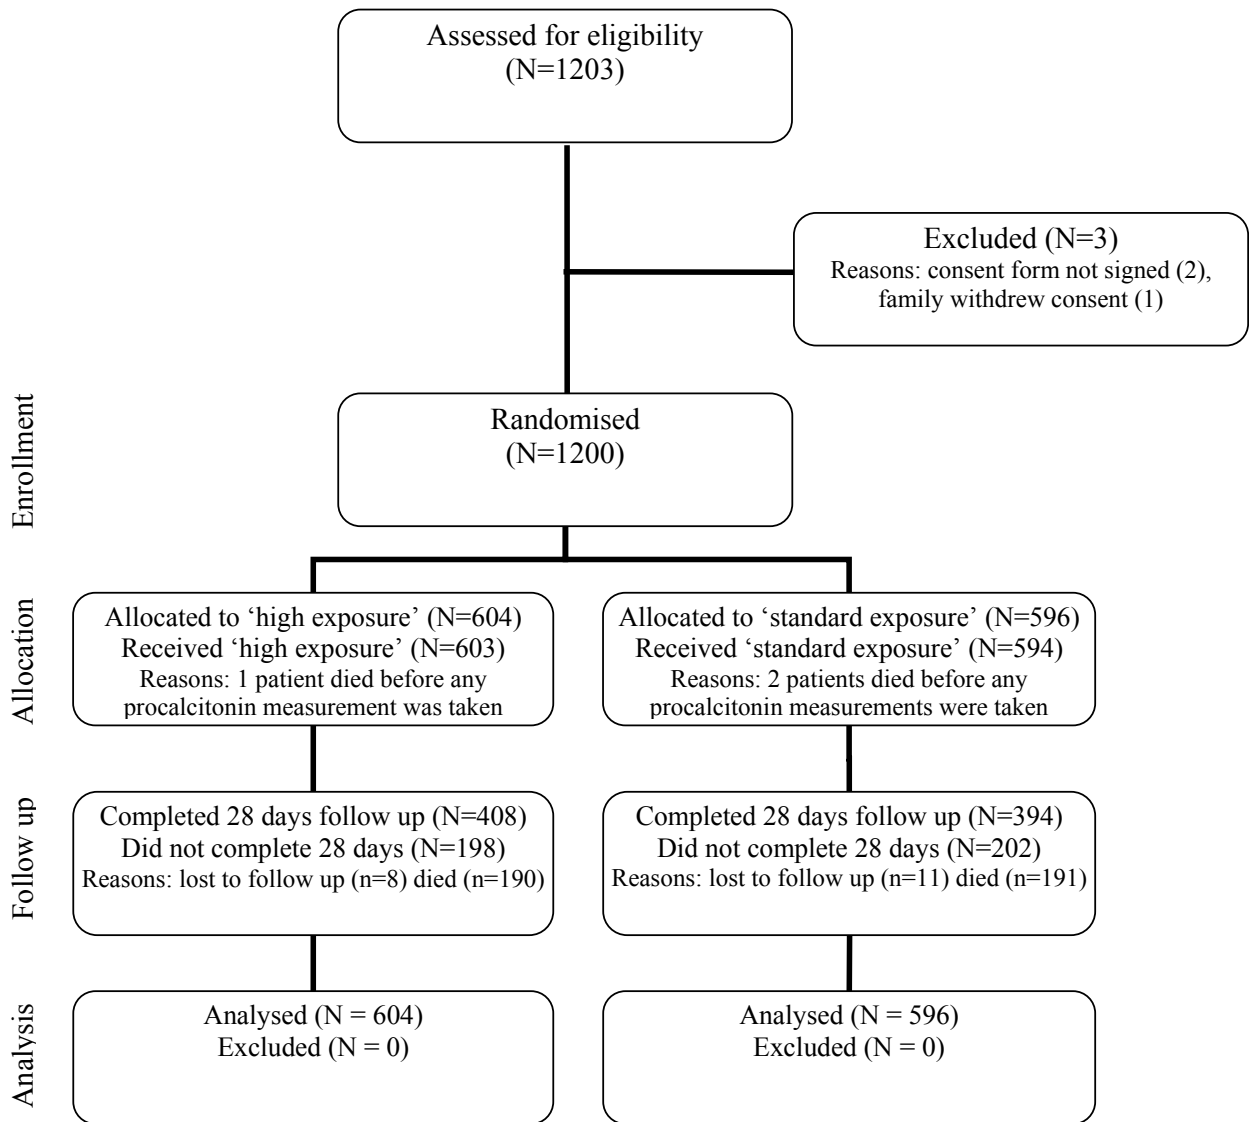

Supplementary Figure 1. Patient Flow Diagram of the trial

Supplement: bmjopen-2011-000635-s7.pdf [file bmjopen-2011-000635-s7.pdf]
